# Supplementary material for: MEDEA: analysis of transcription factor binding motifs in accessible chromatin
Source: HighWire-hosted journal article supplement (doi:10.1101/gr.260877.120), 2020-05-01
Supplement: Supplemental_Fig_S1.pdf [file Supplemental_Fig_S1.pdf]

AUROC  
with  
GENRE

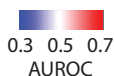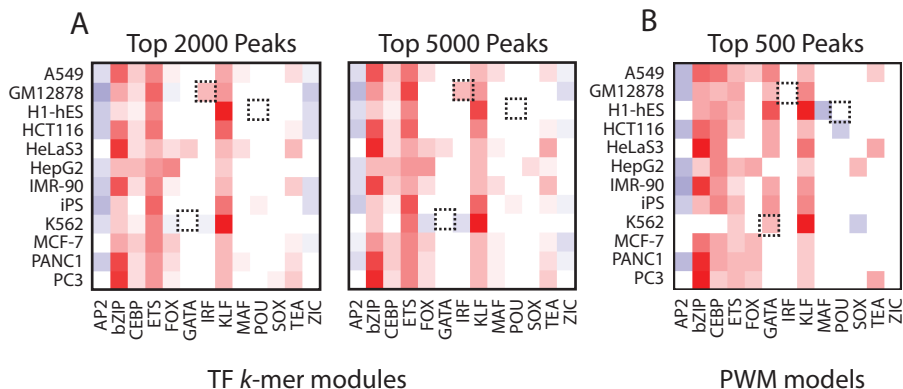

MEDEA

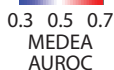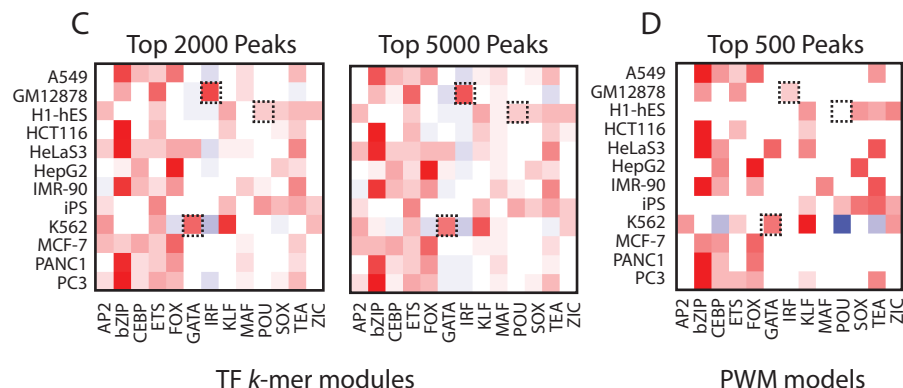

Supplemental Figure S1

**Supplemental Figure S1: AUROC values for motif enrichment patterns are robust to the number of DNase-seq peaks and to the specificity models. (A)** AUROC analysis as in **Fig. 1A**, but performed by using the indicated number of top peaks by signal value, instead of the top 500 peaks. **(B)** AUROC analysis as in **Fig. 1A**, but performed by using Position Weight Matrices for a characteristic TF of the TF family (Benchmarking motifs in **Supplemental Table S1.4**). **(C)** MEDEA AUROC analysis as in **Fig. 2B**, but performed by using the indicated number of top peaks by signal value, instead of the top 500 peaks. **(D)** MEDEA AUROC analysis as in **Fig. 2B**, but performed by using Position Weight Matrices for a characteristic TF of the TF family (Benchmarking motifs in **Supplemental Table S1.4**).
