# Supplementary material for: MEDEA: analysis of transcription factor binding motifs in accessible chromatin
Source: HighWire-hosted journal article supplement (doi:10.1101/gr.260877.120), 2020-05-01
Supplement: Supplemental_Fig_S2.pdf [file Supplemental_Fig_S2.pdf]

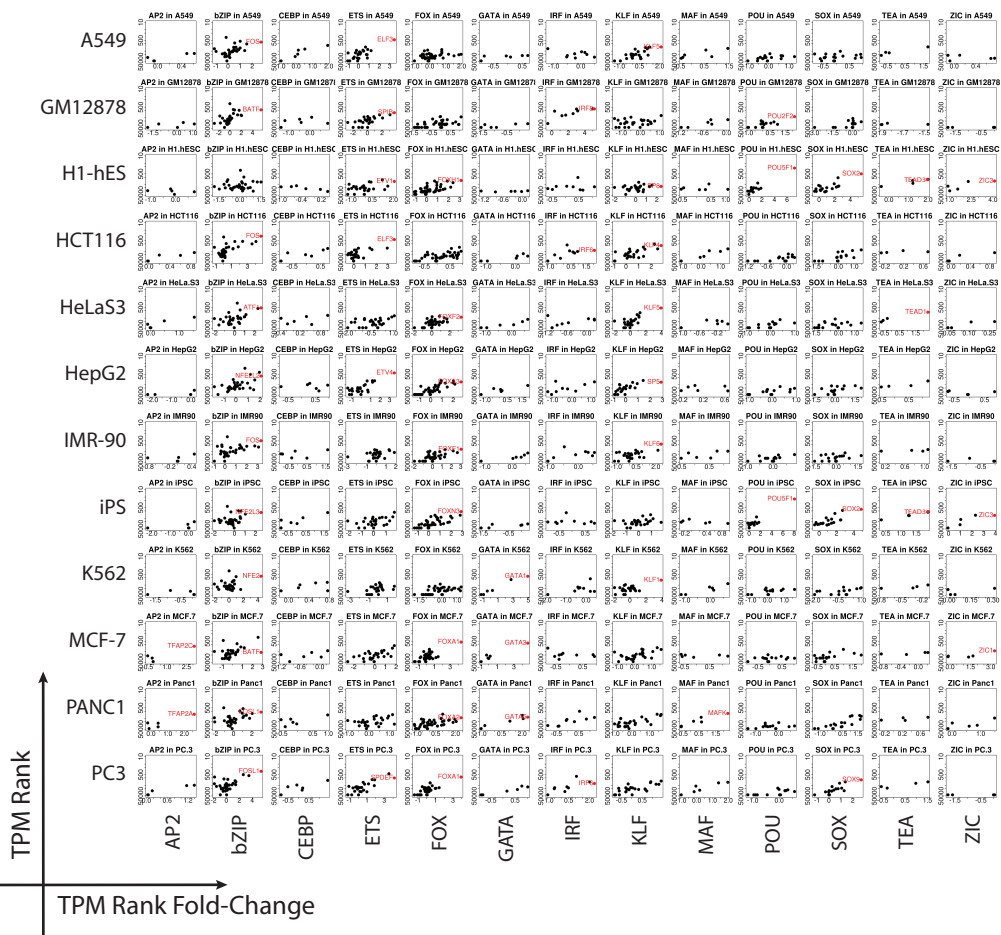

Supplemental Figure S2

**Supplemental Figure S2: Cell-type-dependent expression and up-regulation of TFs sorted by families.** For each member in the indicated TF families, TPM rank (y-axis) and TPM rank fold-change (x-axis) in the indicated cell types. TPM rank is an indication of the TF's level of expression. TPM rank fold-change is relative to the median TPM rank value of the same TF in the other cell types and is used as an estimate of cell-type-specific expression up-regulation. The values and names of the most up-regulated TFs (if beyond 2 fold-change) are shown in red. The plots for IRF in GM12878, POU in H1-hES, and GATA in K562 are also used in the right insets of **Fig. 1B**.
