# Supplementary material for: MEDEA: analysis of transcription factor binding motifs in accessible chromatin
Source: HighWire-hosted journal article supplement (doi:10.1101/gr.260877.120), 2020-05-01
Supplement: Supplemental_Fig_S3.pdf [file Supplemental_Fig_S3.pdf]

**Supplemental Figure S3: Chromatin landscapes of 4 gene loci differentially regulated and dynamically accessible in the cell lines considered in this study.** The indicated genomic profiles are from ENCODE data uploaded in the UCSC Genome Browser. Regions with CTCF ChIP-seq peaks and other housekeeping chromatin binder motifs over all cell lines will likely not give cell-type-specific motif enrichment and should be excluded from further analysis. Downstream analyses should focus on differentially accessible regions, like the **(A)** *ALB* locus in HepG2 cells, **(B)** *IL6* locus in HeLaS3 and K562 cells, **(C)** *NANOG* locus in H1-hES cells, **(D)** and *IGF2* locus in HepG2 and H1-hES cells.
