# Supplementary material for: MEDEA: analysis of transcription factor binding motifs in accessible chromatin
Source: HighWire-hosted journal article supplement (doi:10.1101/gr.260877.120), 2020-05-01
Supplement: Supplemental_Fig_S4.pdf [file Supplemental_Fig_S4.pdf]

# Series of MEDEA filtered peaks

\* = Median Value = MEDEA AUROC

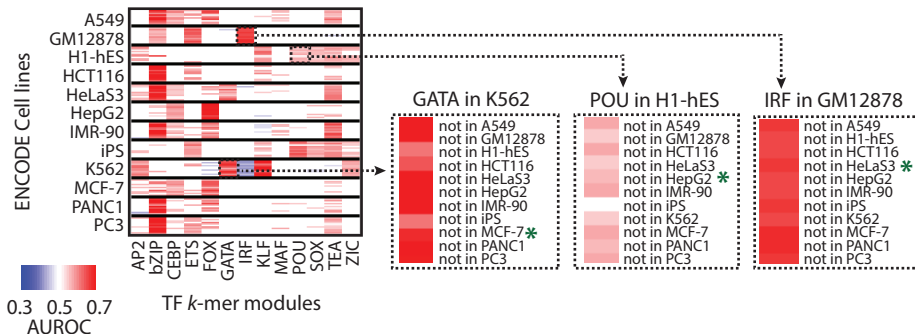

Supplemental Figure S4

**Supplemental Figure S4: MEDEA filtering creates for each input set a series of pairwise subtractions against a reference set of different cell types.** The AUROCs of the indicated 13 *k*-mer modules for each series of the 11 sets of MEDEA-filtered peaks, which were obtained by contrasting the DNase-seq peaks of an input cell type with the DNase-seq peaks of the other 11 cell lines in our reference set (**Methods**). Each bar depicts the AUROC of a MEDEA-filtered peak set. GATA in K562, POU in H1-hES, and IRF in GM12878 are highlighted (as in **Fig. 1A**) and magnified on the right insets, where the median value of each series is marked by a green asterisk. These median values are used in the rest of the analysis to robustly characterize the overall MEDEA enrichment of a motif in a cell type and are presented in **Fig. 2B**.
