# Supplementary material for: MEDEA: analysis of transcription factor binding motifs in accessible chromatin
Source: HighWire-hosted journal article supplement (doi:10.1101/gr.260877.120), 2020-05-01
Supplement: Supplemental_Fig_S5.pdf [file Supplemental_Fig_S5.pdf]

A

Default AME-MEME

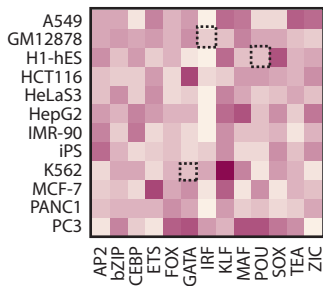

TF PWM motifs

B

HOMER Default

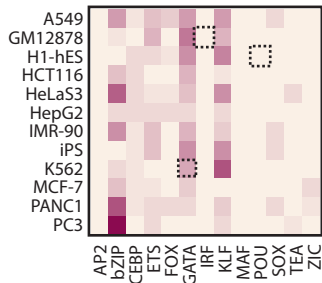

TF PWM motifs

C

AME-MEME with  
ENCODE-DREAM  
background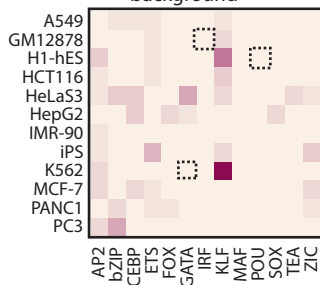

TF PWM motifs

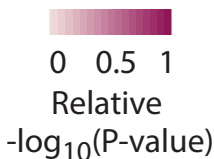

Supplemental Figure S5

**Supplemental Figure S5: Motif enrichment patterns for AME and HOMER.** To compare MEDEA with other state-of-the-art tools, (**A, C**) AME from the MEME suite and (**B**) findMotifsGenome.pl from the HOMER suite were used to calculate the motif enrichment of the indicated PWMs within the benchmarking ENCODE DNase-seq datasets. The upper panels use the default backgrounds of each tool (dinucleotide shuffle and GC-matching followed by autonormalization, respectively) while the bottom panel uses the ENCODE-DREAM DNase-seq datasets as a statistical background (the median value is shown) (**Methods**). Both these tools give P-values as output, which were subsequently  $-\log_{10}$  transformed and normalized to the maximum value per plot for easier comparison between tools.
