# Supplementary material for: MEDEA: analysis of transcription factor binding motifs in accessible chromatin
Source: HighWire-hosted journal article supplement (doi:10.1101/gr.260877.120), 2020-05-01
Supplement: Supplemental_Fig_S7.pdf [file Supplemental_Fig_S7.pdf]

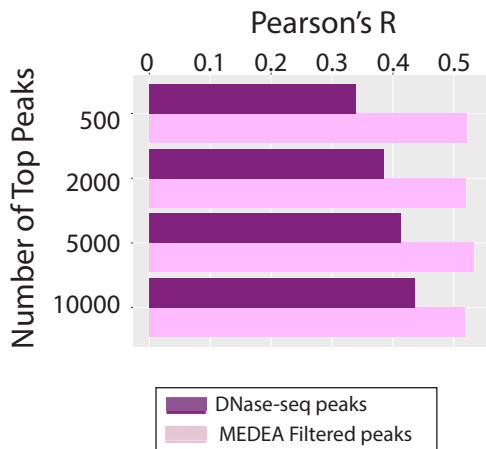

Supplemental Figure S7

**Supplemental Figure S7: MEDEA filtering improves TF motif correlation to TF up-regulation independently of the number of considered top peaks.** Barplot for the correlation coefficient (Pearson's R) between TF up-regulation and motif enrichment obtained either with or without MEDEA filtering (pink and purple bars, respectively) for the indicated amount of top accessibility peaks. Barplots associated to top 500 peaks are the same as "AUROC with GENRE" and "MEDEA" in **Fig. 2F**.
