# Supplementary material for: MEDEA: analysis of transcription factor binding motifs in accessible chromatin
Source: HighWire-hosted journal article supplement (doi:10.1101/gr.260877.120), 2020-05-01
Supplement: Supplemental_Fig_S8.pdf [file Supplemental_Fig_S8.pdf]

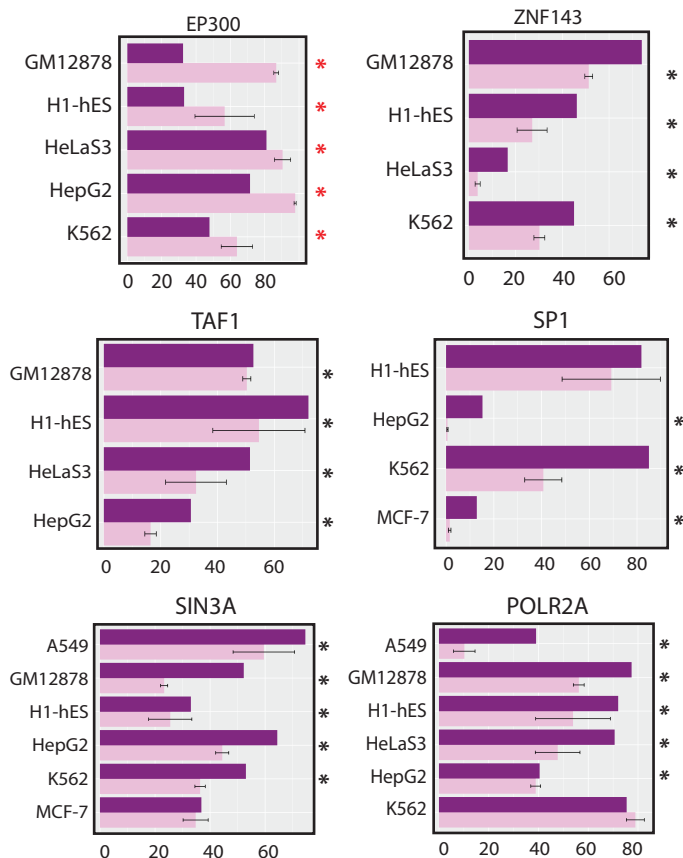

Accessible peaks overlapping with ChIP-seq peaks (%)

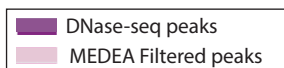

\* Significant Decrease ( $P < 0.01$ )

\* Significant Increase ( $P < 0.01$ )

Supplemental Figure S8

**Supplemental Figure S8: MEDEA filtering sorts out accessible peaks associated with general transcriptional co-activators and chromatin binders.** Similar to **Fig. 3A**, percentages of either the best 500 unfiltered DNase-seq peaks (purple bars) or the best 500 MEDEA-filtered DNase-seq peaks (pink bars, mean and SD within each MEDEA-filtered series is presented) that overlap with TF ChIP-seq peaks for the indicated chromatin binding factors (**Methods**). ChIP-seq datasets were obtained from ENCODE (**Supplemental Table S1.1**).
