# Supplementary material for: MEDEA: analysis of transcription factor binding motifs in accessible chromatin
Source: HighWire-hosted journal article supplement (doi:10.1101/gr.260877.120), 2020-05-01
Supplement: Supplemental_Fig_S9.pdf [file Supplemental_Fig_S9.pdf]

# A H1-hESC - Myers - [ENCSR000BIT](#) TCF12

1.  
436 / 500  
1.4e-412  
CCAGGTGT

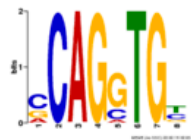

TCF12 Motif

2.  
100 / 500  
7.4e-91  
TTTTGTTATGCAAAT

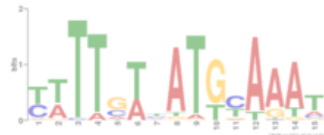

POU5F1 Motif

# B GM12878 - Weissman - [ENCSR000EYV](#) JUND

2.  
122 / 500  
2.0e-42  
TGAGTCAT

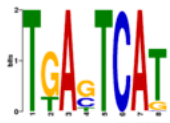

JUN motif

3.  
69 / 500  
1.1e-18  
AAGAACTGAAA

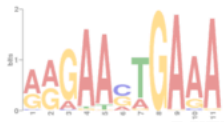

SPI1-IRF motif

# GM12878 - Myers - [ENCSR000BKB](#) Mef2A

1.  
484 / 500  
2.0e-459  
TGCTATTTTGAAT

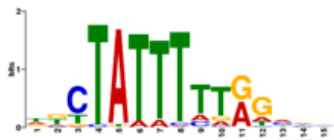

MEF motif

2.  
129 / 500  
1.1e-65  
GGAAGTAAAG

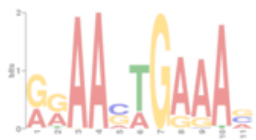

SPI1-IRF motif

# C K562 - Snyder - [ENCSR000EGN](#) JUND

1.  
412 / 500  
6.7e-817  
AGGATGACTCATCGG

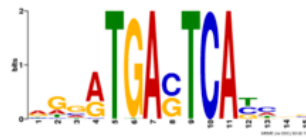

JUN motif

5.  
110 / 500  
3.6e-22  
CAGATAAG

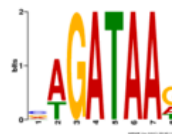

GATA motif

# K562 - Myers - [ENCSR000BRS](#) NR2F2

1.  
397 / 500  
1.1e-282  
ACAGATAAGG

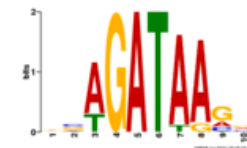

GATA motif

2.  
343 / 500  
7.3e-138  
AAGGTCAG

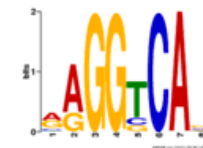

NR motif

3.  
219 / 500  
7.4e-31  
GCAGCTGT

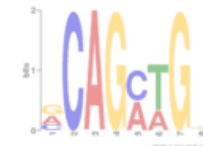

E-BOX/TAL  
motif

**Supplemental Figure S9: FactorBook analysis of motif enrichment.** For the indicated combinations of TFs and cell types, which had a mean fold-change of DFP overlap in MEDEA-filtered peaks above 2 (**Fig. 3B**), we checked the motif enrichment predicted by FactorBook (<http://www.factorbook.org/human/chipseq/tf/>) in the associated ChIP-seq peaks. The panels collect the enriched motifs that show the predicted specificity of either the ChIPed factors or other lineage specifiers. Transparent panels indicate that the enriched motifs were not found significantly centered toward the peak summits.
