# Supplementary material for: MEDEA: analysis of transcription factor binding motifs in accessible chromatin
Source: HighWire-hosted journal article supplement (doi:10.1101/gr.260877.120), 2020-05-01
Supplement: Supplemental_Fig_S10.pdf [file Supplemental_Fig_S10.pdf]

A

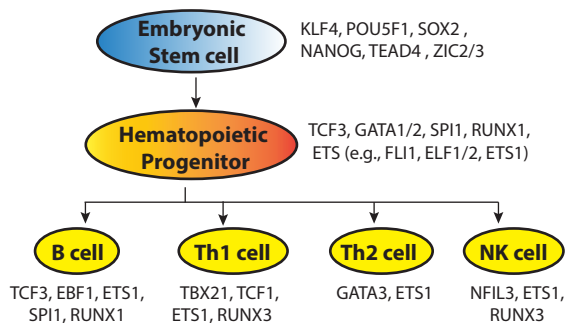

B

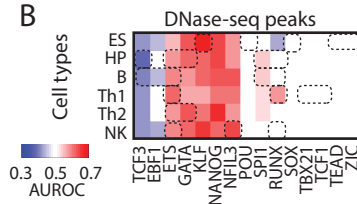

C

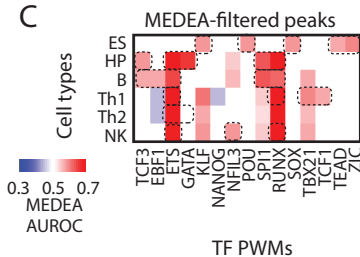

Supplemental Figure S10

**Supplemental Figure S10: MEDEA motif enrichment recapitulates the hematopoietic lineage differentiation in primary cells.** (A) Scheme of TFs that have been characterized as regulators in the considered cell types during hematopoiesis. (B-C) Heatmap of motif enrichment for lineage regulators in hematopoietic differentiation. In accessible regions of the indicated cell types (**Supplemental Table S1.3**), enrichment for the indicated PWMs (Lymphoid Lineage motifs in **Supplemental Table S1.4**) were calculated either by (B) using Glossary with GENRE for AUROC implementation similarly to **Fig. 1A**, or by (C) using MEDEA (filtering and AUROC), similarly to **Fig. 2B**.
