# Supplementary material for: MEDEA: analysis of transcription factor binding motifs in accessible chromatin
Source: HighWire-hosted journal article supplement (doi:10.1101/gr.260877.120), 2020-05-01
Supplement: Supplemental_Fig_S11.pdf [file Supplemental_Fig_S11.pdf]

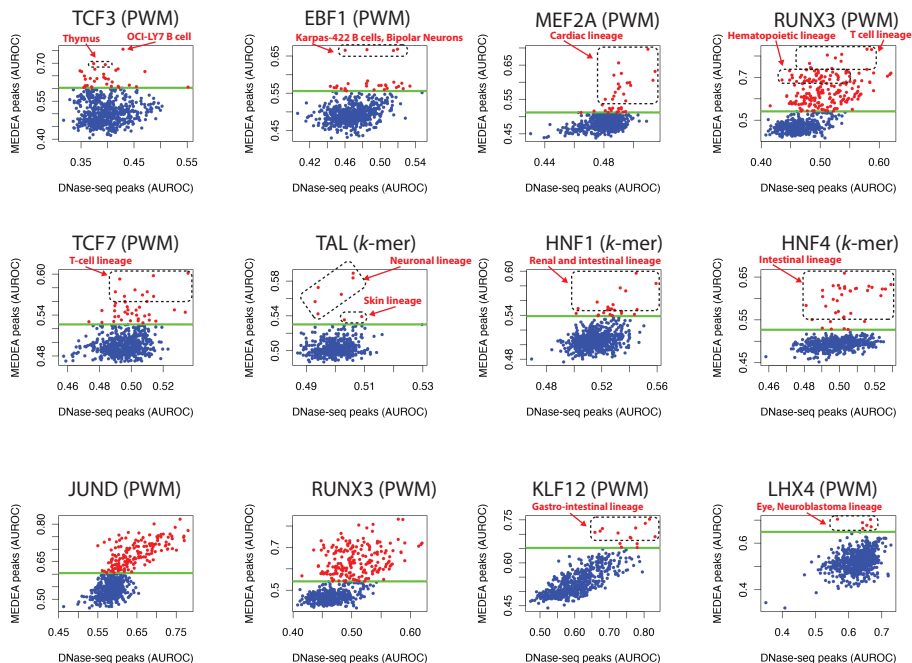

Supplemental Figure S11

**Supplemental Figure S11: Sorting the explorative AUROC distribution in high and low pools of enrichment for each motif.** Similar to **Fig. 4B** for the indicated specificity models. Red points depict “high pool” (**Supplemental Table S3.3**) of the MEDEA AUROC values distinguished by using a threshold set at 3 deviations above the MEDEA AUROC median (green line, **Supplemental Table S3.2, Methods**). Blue points represent “low pool”. Representative cell types associated to clusters in the high pool are also presented in red with dotted black boxes indicating their AUROC values.
