# Supplementary material for: MEDEA: analysis of transcription factor binding motifs in accessible chromatin
Source: HighWire-hosted journal article supplement (doi:10.1101/gr.260877.120), 2020-05-01
Supplement: Supplemental_Fig_S13.pdf [file Supplemental_Fig_S13.pdf]

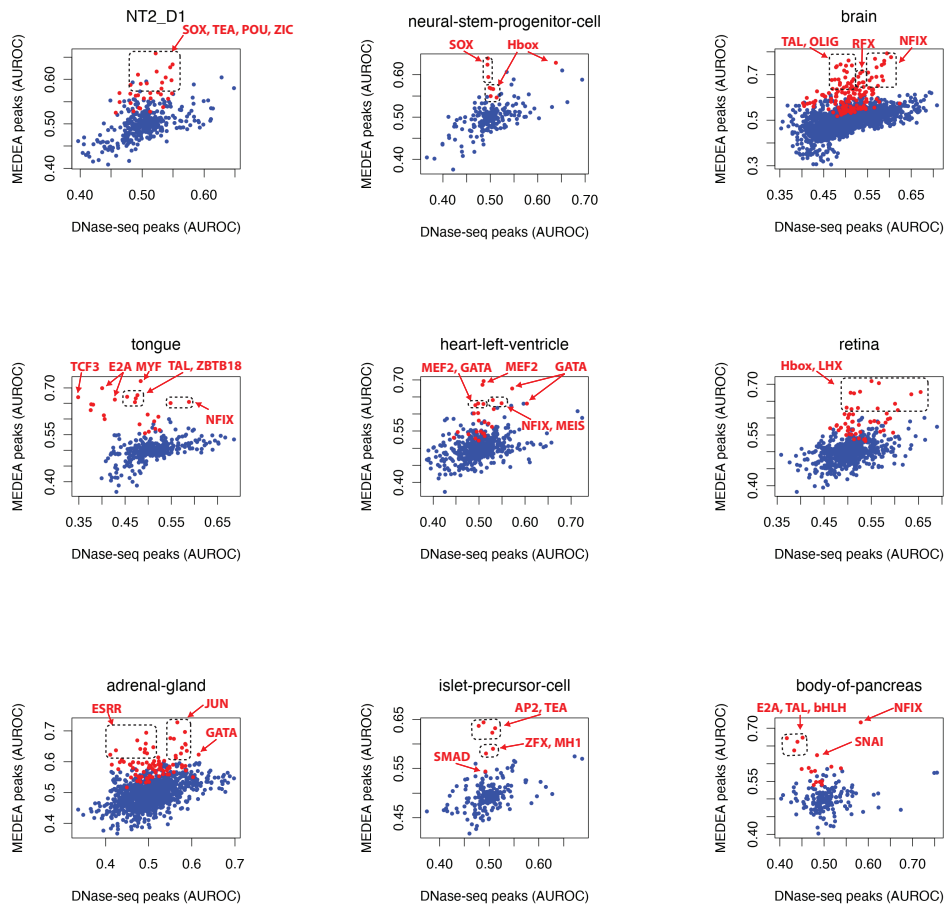

Supplemental Figure S13

**Supplemental Figure S13: Rearranging the explorative AUROC high and low pools by cell type.** Similar to **Fig. 4D** for the indicated cell types. Red and blue points depict “high pool” and “low pool” according to the motif-based thresholds (**Methods**). Motifs found in the high pools are indicated in red.
