# Supplementary material for: MEDEA: analysis of transcription factor binding motifs in accessible chromatin
Source: HighWire-hosted journal article supplement (doi:10.1101/gr.260877.120), 2020-05-01
Supplement: Supplemental_Fig_S14.pdf [file Supplemental_Fig_S14.pdf]

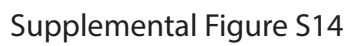

**Supplemental Figure S14: Clustering analysis of MEDEA enriched motifs in ENCODE datasets reveal the TF regulatory patterns behind cellular differentiation (labelled).** The same 2-dimensional hierarchical clustering presented in **Fig. 5** and labelled with all the TF motifs and cell types analyzed.
