# Supplementary material for: MEDEA: analysis of transcription factor binding motifs in accessible chromatin
Source: HighWire-hosted journal article supplement (doi:10.1101/gr.260877.120), 2020-05-01
Supplement: Supplemental_Table_S1.xlsx [file Supplemental_Table_S1.xlsx]

## Sheet: S1.1 Benchmarking
Supplemental Table S1.1: Benchmarking. Accession file IDs used in this study for the benchmarking of MEDEA (Figures 1-3, 6, Supplemental Figures S1-S2, S4-8, S15)
Experiment Type	Cell Type	Accession ID
DNase-seq	A549	ENCFF001WDB
DNase-seq	A549	ENCFF001WDC
DNase-seq	GM12878	ENCFF001WFT
DNase-seq	GM12878	ENCFF001WFU
DNase-seq	H1-hESC	ENCFF050KLL
DNase-seq	H1-hESC	ENCFF065XPI
DNase-seq	HCT116	ENCFF001WIJ
DNase-seq	HCT116	ENCFF001WIK
DNase-seq	HeLa-S3	ENCFF692NCU
DNase-seq	HeLa-S3	ENCFF686YQV
DNase-seq	HepG2	ENCFF873IZM
DNase-seq	HepG2	ENCFF638QYQ
DNase-seq	IMR90	ENCFF043JFY
DNase-seq	IMR90	ENCFF991PVJ
DNase-seq	iPSC	ENCFF779LNR
DNase-seq	K562	ENCFF121EHW
DNase-seq	K562	ENCFF355WGC
DNase-seq	MCF-7	ENCFF001WPV
DNase-seq	MCF-7	ENCFF001WPW
DNase-seq	Panc1	ENCFF001WRT
DNase-seq	Panc1	ENCFF001WRU
DNase-seq	PC-3	ENCFF517MGK
DNase-seq	PC-3	ENCFF648RFL
DNase-seq BAM	A549	ENCFF001CLE
DNase-seq BAM	A549	ENCFF001CLJ
DNase-seq BAM	GM12878	ENCFF001CTZ
DNase-seq BAM	GM12878	ENCFF001CUI
DNase-seq BAM	H1-hESC	ENCFF294YVG
DNase-seq BAM	H1-hESC	ENCFF923SKV
DNase-seq BAM	HCT116	ENCFF001DBR
DNase-seq BAM	HCT116	ENCFF001DBX
DNase-seq BAM	HeLa-S3	ENCFF680YMH
DNase-seq BAM	HeLa-S3	ENCFF326UIF
DNase-seq BAM	HepG2	ENCFF344SJX
DNase-seq BAM	HepG2	ENCFF770GHF
DNase-seq BAM	IMR90	ENCFF876IHU
DNase-seq BAM	IMR90	ENCFF830EHR
DNase-seq BAM	iPSC	ENCFF052FAL
DNase-seq BAM	K562	ENCFF441RET
DNase-seq BAM	K562	ENCFF271LGJ
DNase-seq BAM	MCF-7	ENCFF001DYE
DNase-seq BAM	MCF-7	ENCFF001DYM
DNase-seq BAM	Panc1	ENCFF001EDO
DNase-seq BAM	Panc1	ENCFF001EDP
DNase-seq BAM	PC-3	ENCFF477SYF
DNase-seq BAM	PC-3	ENCFF482KXU
FAIRE-seq	HeLa-S3	ENCFF001UYM
FAIRE-seq	A549	ENCFF001UXY
FAIRE-seq	GM12878	ENCFF001UYE
FAIRE-seq	HepG2	ENCFF001UYN
FAIRE-seq	H1-hESC	ENCFF001UYJ
FAIRE-seq	K562	ENCFF001UYS
FAIRE-seq	MCF-7	ENCFF001UYW
ATAC-seq	A549	ENCFF348ZZP
ATAC-seq	A549	ENCFF550DRF
ATAC-seq	A549	ENCFF801YCD
ATAC-seq	GM12878	GSE47753
ATAC-seq	K562	GSM2695560
ATAC-seq	K562	GSM2695561
ATAC-seq	K562	GSM2695562
ATAC-seq	H9-hESC	GSE92279
scATAC-seq	GM12878	GSE65360
scATAC-seq	H1-hESC	GSE65360
scATAC-seq	K562	GSE65360
DNase-seq REF	A549	syn6176257
DNase-seq REF	GM12878	syn6176258
DNase-seq REF	H1-hESC	syn6176248
DNase-seq REF	HCT116	syn6176255
DNase-seq REF	HeLa-S3	syn6176254
DNase-seq REF	HepG2	syn6176250
DNase-seq REF	IMR90	syn6176251
DNase-seq REF	iPSC	syn6283047
DNase-seq REF	K562	syn6176252
DNase-seq REF	MCF-7	syn6176253
DNase-seq REF	Panc1	syn6176256
DNase-seq REF	PC-3	syn6276943
RNA-seq	A549	syn6176347
RNA-seq	A549	syn6176349
RNA-seq	GM12878	syn6176330
RNA-seq	GM12878	syn6176339
RNA-seq	H1-hESC	syn6182245
RNA-seq	H1-hESC	syn6182238
RNA-seq	HCT116	syn6176335
RNA-seq	HCT116	syn6176331
RNA-seq	HeLa-S3	syn6176346
RNA-seq	HeLa-S3	syn6176344
RNA-seq	HepG2	syn6176340
RNA-seq	HepG2	syn6176351
RNA-seq	IMR90	syn6176352
RNA-seq	IMR90	syn6176333
RNA-seq	iPSC	syn6235613
RNA-seq	iPSC	syn6235599
RNA-seq	K562	syn6176334
RNA-seq	K562	syn6176338
RNA-seq	MCF-7	syn6176332
RNA-seq	MCF-7	syn6176353
RNA-seq	Panc1	syn6176348
RNA-seq	Panc1	syn6176341
RNA-seq	PC-3	syn6235729
RNA-seq	PC-3	syn6235587
H3K4me1 ChIP-seq	A549	ENCFF872XNX
H3K4me1 ChIP-seq	A549	ENCFF209CGO
H3K4me1 ChIP-seq	A549	ENCFF276ZZL
H3K4me1 ChIP-seq	GM12878	ENCFF921LKB
H3K4me1 ChIP-seq	H1-hESC	ENCFF834NWA
H3K4me1 ChIP-seq	HCT116	ENCFF505EDN
H3K4me1 ChIP-seq	HeLa-S3	ENCFF162RSB
H3K4me1 ChIP-seq	HepG2	ENCFF428FAW
H3K4me1 ChIP-seq	IMR-90	ENCFF830JTY
H3K4me1 ChIP-seq	iPSC	ENCFF485HSK
H3K4me1 ChIP-seq	K562	ENCFF183UQD
H3K4me1 ChIP-seq	MCF-7	ENCFF674BKS
H3K4me1 ChIP-seq	Panc1	ENCFF266XIG
H3K4me1 ChIP-seq	PC-3	ENCFF160ODC
H3K27ac ChIP-seq	A549	ENCFF981LQL
H3K27ac ChIP-seq	A549	ENCFF319QRW
H3K27ac ChIP-seq	A549	ENCFF462ISY
H3K27ac ChIP-seq	GM12878	ENCFF816AHV
H3K27ac ChIP-seq	H1-hESC	ENCFF335JSA
H3K27ac ChIP-seq	HCT116	ENCFF590YIB
H3K27ac ChIP-seq	HeLa-S3	ENCFF144EOJ
H3K27ac ChIP-seq	HepG2	ENCFF825NBZ
H3K27ac ChIP-seq	IMR-90	ENCFF678QLP
H3K27ac ChIP-seq	iPSC	ENCFF631JHU
H3K27ac ChIP-seq	K562	ENCFF044JNJ
H3K27ac ChIP-seq	MCF-7	ENCFF132IWN
H3K27ac ChIP-seq	Panc1	ENCFF526BJR
H3K27ac ChIP-seq	PC-3	ENCFF487YGN
CTCF ChIP-seq	A549	ENCFF300IYQ
CTCF ChIP-seq	GM12878	ENCFF710VEH
CTCF ChIP-seq	GM23338	ENCFF760HUV
CTCF ChIP-seq	H1-hESC	ENCFF093VEE
CTCF ChIP-seq	HCT116	ENCFF364QXM
CTCF ChIP-seq	HeLa-S3	ENCFF768OPK
CTCF ChIP-seq	HepG2	ENCFF237OKO
CTCF ChIP-seq	IMR90	ENCFF453XKM
CTCF ChIP-seq	K562	ENCFF738TKN
CTCF ChIP-seq	MCF-7	ENCFF414FWV
CTCF ChIP-seq	Panc1	ENCFF450CNK
CTCF ChIP-seq	PC-3	ENCFF258RWN
EP300 ChIP-seq	GM12878	ENCFF222XPQ
EP300 ChIP-seq	H1-hESC	ENCFF843SYD
EP300 ChIP-seq	HeLa-S3	ENCFF784YVX
EP300 ChIP-seq	HepG2	ENCFF547POU
EP300 ChIP-seq	K562	ENCFF549TYR
POLR2A ChIP-seq	A549	ENCFF002DAE
POLR2A ChIP-seq	GM12878	ENCFF120VUT
POLR2A ChIP-seq	H1-hESC	ENCFF468LYO
POLR2A ChIP-seq	HeLa-S3	ENCFF417LLT
POLR2A ChIP-seq	HepG2	ENCFF992LSQ
POLR2A ChIP-seq	K562	ENCFF947KPB
SIN3A ChIP-seq	A549	ENCFF172VGB
SIN3A ChIP-seq	GM12878	ENCFF778DJD
SIN3A ChIP-seq	H1-hESC	ENCFF820OMK
SIN3A ChIP-seq	HepG2	ENCFF786HHN
SIN3A ChIP-seq	K562	ENCFF191MPD
SIN3A ChIP-seq	MCF-7	ENCFF580NQL
SP1 ChIP-seq	H1-hESC	ENCFF317TBZ
SP1 ChIP-seq	HepG2	ENCFF573ALP
SP1 ChIP-seq	K562	ENCFF300XUA
SP1 ChIP-seq	MCF-7	ENCFF193MKL
TAF1 ChIP-seq	GM12878	ENCFF544NRC
TAF1 ChIP-seq	H1-hESC	ENCFF202SNU
TAF1 ChIP-seq	HeLa-S3	ENCFF305QDB
TAF1 ChIP-seq	HepG2	ENCFF345GZF
ZNF143 ChIP-seq	GM12878	ENCFF544NXC
ZNF143 ChIP-seq	H1-hESC	ENCFF964BYN
ZNF143 ChIP-seq	HeLa-S3	ENCFF002CTP
ZNF143 ChIP-seq	K562	ENCFF114IWY

## Sheet: S1.2 Explorative Analysis
Supplemental Table S1.2: Explorative Analysis. Accession file IDs for the DNase-seq datasets used in this study for the explorative analyses (Figures 4-5 and Supplemental Figures S11-14)
Experiment Type	Cell Type	Accession ID
DNase-seq	GM04504	ENCFF486BHM
DNase-seq	GM04504	ENCFF287SCA
DNase-seq	MCF-7 Treated	ENCFF843TIA
DNase-seq	MCF-7 Treated	ENCFF050MBM
DNase-seq	HepG2	ENCFF767JPZ
DNase-seq	HepG2	ENCFF910QEB
DNase-seq	muscle of trunk	ENCFF836ETB
DNase-seq	T-helper 2 cell	ENCFF481KKG
DNase-seq	brain	ENCFF528GDM
DNase-seq	pulmonary artery endothelial cell	ENCFF897JBO
DNase-seq	spleen	ENCFF587YNA
DNase-seq	lung	ENCFF735APJ
DNase-seq	lung	ENCFF818WPF
DNase-seq	right lung	ENCFF134ZJK
DNase-seq	psoas muscle	ENCFF523BCF
DNase-seq	cardiovascular progenitor cell Treated	ENCFF836DBU
DNase-seq	cardiovascular progenitor cell Treated	ENCFF090WJW
DNase-seq	adrenal gland	ENCFF829ZEZ
DNase-seq	GM04503	ENCFF452WOT
DNase-seq	GM04503	ENCFF553BZD
DNase-seq	muscle of back	ENCFF261BTV
DNase-seq	thymus	ENCFF961JXL
DNase-seq	adrenal gland	ENCFF352HSZ
DNase-seq	iris pigment epithelial cell	ENCFF272LQP
DNase-seq	iris pigment epithelial cell	ENCFF231PPP
DNase-seq	right lung	ENCFF036PGY
DNase-seq	left lung	ENCFF663LIJ
DNase-seq	left kidney	ENCFF360YZY
DNase-seq	keratinocyte	ENCFF566JBQ
DNase-seq	keratinocyte	ENCFF894LMB
DNase-seq	GM12864	ENCFF097IKA
DNase-seq	muscle of back	ENCFF397QTB
DNase-seq	muscle of back	ENCFF474MZJ
DNase-seq	right kidney	ENCFF653DQL
DNase-seq	placenta	ENCFF128BFZ
DNase-seq	HeLa-S3	ENCFF526VFR
DNase-seq	HeLa-S3	ENCFF006OZN
DNase-seq	stomach	ENCFF447UPF
DNase-seq	heart	ENCFF805BEX
DNase-seq	fibroblast of dermis	ENCFF445GCV
DNase-seq	fibroblast of dermis	ENCFF178BEG
DNase-seq	stomach	ENCFF877XCF
DNase-seq	muscle of leg	ENCFF401SKP
DNase-seq	muscle of arm	ENCFF588SBI
DNase-seq	placenta	ENCFF502POZ
DNase-seq	placenta	ENCFF421EQO
DNase-seq	renal cortex interstitium	ENCFF718DFS
DNase-seq	renal cortex interstitium	ENCFF295UQG
DNase-seq	IMR-90	ENCFF895BJS
DNase-seq	heart	ENCFF358VDV
DNase-seq	A549	ENCFF475BVB
DNase-seq	A549	ENCFF470VZX
DNase-seq	muscle of arm	ENCFF996VLV
DNase-seq	muscle of arm	ENCFF888NOP
DNase-seq	lung	ENCFF274FLT
DNase-seq	ovary	ENCFF883WWT
DNase-seq	T-cell	ENCFF168YQF
DNase-seq	muscle of arm	ENCFF837KHA
DNase-seq	muscle of back	ENCFF171JLD
DNase-seq	spinal cord	ENCFF162HDT
DNase-seq	iPS DF 19.11	ENCFF779LNR
DNase-seq	fibroblast of skin of left biceps	ENCFF837VPM
DNase-seq	left lung	ENCFF289XNF
DNase-seq	stomach	ENCFF738QCO
DNase-seq	heart	ENCFF590FZJ
DNase-seq	fibroblast of skin of left quadriceps	ENCFF488SRU
DNase-seq	large intestine	ENCFF663DTX
DNase-seq	LNCaP clone FGC	ENCFF452EGS
DNase-seq	LNCaP clone FGC	ENCFF806PZH
DNase-seq	stomach	ENCFF701IYS
DNase-seq	large intestine	ENCFF679HWR
DNase-seq	fibroblast of skin of abdomen	ENCFF045KGY
DNase-seq	CD14-positive monocyte	ENCFF424GPY
DNase-seq	right lung	ENCFF428OZI
DNase-seq	glomerular endothelial cell	ENCFF993TCA
DNase-seq	glomerular endothelial cell	ENCFF927KUT
DNase-seq	left lung	ENCFF233TRB
DNase-seq	foreskin fibroblast	ENCFF811FJV
DNase-seq	T-helper 1 cell	ENCFF195KNE
DNase-seq	thymus	ENCFF601PAY
DNase-seq	kidney	ENCFF743APB
DNase-seq	kidney	ENCFF384SLZ
DNase-seq	thyroid gland	ENCFF852FLF
DNase-seq	right renal cortex interstitium	ENCFF585XKV
DNase-seq	stomach	ENCFF087QAV
DNase-seq	MCF-7	ENCFF158BBA
DNase-seq	MCF-7	ENCFF382GKE
DNase-seq	brain	ENCFF457XYZ
DNase-seq	right lung	ENCFF975JLM
DNase-seq	stomach	ENCFF122TCQ
DNase-seq	stomach	ENCFF941HUI
DNase-seq	trophoblast cell	ENCFF941ZRQ
DNase-seq	lung	ENCFF391BRB
DNase-seq	brain	ENCFF230WCV
DNase-seq	testis	ENCFF843ZSC
DNase-seq	heart	ENCFF327HDP
DNase-seq	muscle of leg	ENCFF347YCV
DNase-seq	heart	ENCFF007RSQ
DNase-seq	muscle of arm	ENCFF311LCN
DNase-seq	left kidney	ENCFF531XHH
DNase-seq	right lung	ENCFF104JWY
DNase-seq	neural progenitor cell	ENCFF572AAL
DNase-seq	neural progenitor cell	ENCFF230SPN
DNase-seq	CD1c-positive myeloid dendritic cell	ENCFF267VKD
DNase-seq	CD1c-positive myeloid dendritic cell	ENCFF096NVD
DNase-seq	dermis blood vessel endothelial cell	ENCFF419NYS
DNase-seq	dermis blood vessel endothelial cell	ENCFF045UNP
DNase-seq	hematopoietic multipotent progenitor cell	ENCFF866SPM
DNase-seq	L1-S8R	ENCFF782LZX
DNase-seq	L1-S8R	ENCFF713OZX
DNase-seq	lung microvascular endothelial cell	ENCFF446FTN
DNase-seq	lung microvascular endothelial cell	ENCFF957JQC
DNase-seq	H9	ENCFF025CIA
DNase-seq	muscle of trunk	ENCFF448DSH
DNase-seq	brain pericyte	ENCFF972QQK
DNase-seq	brain	ENCFF322ZNH
DNase-seq	right kidney	ENCFF276TVG
DNase-seq	small intestine	ENCFF321LTV
DNase-seq	mesodermal cell Treated	ENCFF604XDM
DNase-seq	spinal cord	ENCFF753RBC
DNase-seq	fibroblast of the conjunctiva	ENCFF272AFT
DNase-seq	fibroblast of the conjunctiva	ENCFF764ODA
DNase-seq	lung	ENCFF744LRT
DNase-seq	left lung	ENCFF690DRM
DNase-seq	right lung	ENCFF664QUB
DNase-seq	stomach	ENCFF640UDN
DNase-seq	thymus	ENCFF061UBG
DNase-seq	H1	ENCFF807SXP
DNase-seq	H1	ENCFF810YLL
DNase-seq	M059J	ENCFF238GMN
DNase-seq	M059J	ENCFF767GYT
DNase-seq	placenta	ENCFF602BHS
DNase-seq	thymus	ENCFF189LKP
DNase-seq	hindlimb muscle	ENCFF903ULR
DNase-seq	CMK	ENCFF437IAA
DNase-seq	heart	ENCFF926JFU
DNase-seq	Panc1	ENCFF367WMG
DNase-seq	Panc1	ENCFF553OYG
DNase-seq	kidney	ENCFF515FKC
DNase-seq	left lung	ENCFF827RCC
DNase-seq	heart	ENCFF871GML
DNase-seq	fibroblast of skin of upper back	ENCFF469AJE
DNase-seq	fibroblast of skin of left quadriceps	ENCFF474QAJ
DNase-seq	fibroblast of skin of right biceps	ENCFF382NHI
DNase-seq	non-pigmented ciliary epithelial cell	ENCFF105ETE
DNase-seq	non-pigmented ciliary epithelial cell	ENCFF699EKS
DNase-seq	large intestine	ENCFF416JUZ
DNase-seq	fibroblast of peridontal ligament	ENCFF620HKT
DNase-seq	fibroblast of peridontal ligament	ENCFF089IWT
DNase-seq	T-cell	ENCFF133ILP
DNase-seq	common myeloid progenitor, CD34-positive	ENCFF024DAR
DNase-seq	renal cortex interstitium	ENCFF354AEP
DNase-seq	renal cortex interstitium	ENCFF645BDW
DNase-seq	cardiac fibroblast	ENCFF653KYK
DNase-seq	cardiac fibroblast	ENCFF528ZJQ
DNase-seq	lung	ENCFF251ZXX
DNase-seq	muscle of leg	ENCFF542RWT
DNase-seq	kidney	ENCFF871HXB
DNase-seq	small intestine	ENCFF559HGO
DNase-seq	CD8-positive, alpha-beta T cell	ENCFF512IML
DNase-seq	muscle of leg	ENCFF020LII
DNase-seq	HS-27A	ENCFF932FKV
DNase-seq	left kidney	ENCFF629LQR
DNase-seq	kidney	ENCFF313UXI
DNase-seq	right lung	ENCFF857LHK
DNase-seq	kidney	ENCFF744IAP
DNase-seq	CD4-positive, alpha-beta T cell	ENCFF703UHS
DNase-seq	lung	ENCFF243LFH
DNase-seq	ovary	ENCFF498QOJ
DNase-seq	muscle of back	ENCFF355JBS
DNase-seq	mesenchymal stem cell	ENCFF745UXV
DNase-seq	muscle of arm	ENCFF611CTG
DNase-seq	renal cortex interstitium	ENCFF027SVR
DNase-seq	iPS DF 19.7	ENCFF897BWH
DNase-seq	large intestine	ENCFF920DDN
DNase-seq	common myeloid progenitor, CD34-positive	ENCFF171LSI
DNase-seq	large intestine	ENCFF276FKY
DNase-seq	large intestine	ENCFF794IVB
DNase-seq	fibroblast of skin of right quadriceps	ENCFF191HPU
DNase-seq	CD14-positive monocyte	ENCFF063IUG
DNase-seq	heart	ENCFF053SED
DNase-seq	bronchial epithelial cell	ENCFF546QUZ
DNase-seq	bronchial epithelial cell	ENCFF338GII
DNase-seq	thymus	ENCFF880KWE
DNase-seq	common myeloid progenitor, CD34-positive	ENCFF059VUS
DNase-seq	stomach	ENCFF933ABR
DNase-seq	muscle of back	ENCFF785PSO
DNase-seq	common myeloid progenitor, CD34-positive	ENCFF854EJY
DNase-seq	brain	ENCFF560YBU
DNase-seq	T-helper 17 cell	ENCFF483RJF
DNase-seq	adrenal gland	ENCFF094AUJ
DNase-seq	foreskin melanocyte	ENCFF838FGZ
DNase-seq	fibroblast of skin of scalp	ENCFF594OFO
DNase-seq	heart	ENCFF086KUU
DNase-seq	CD8-positive, alpha-beta T cell	ENCFF566SXQ
DNase-seq	fibroblast of pulmonary artery	ENCFF385ZNB
DNase-seq	fibroblast of pulmonary artery	ENCFF417VBX
DNase-seq	left lung	ENCFF794AMB
DNase-seq	right lung	ENCFF245TMF
DNase-seq	NT2/D1	ENCFF506YRM
DNase-seq	NT2/D1	ENCFF366XFZ
DNase-seq	renal cortex interstitium	ENCFF341ZYC
DNase-seq	thyroid gland	ENCFF665WNI
DNase-seq	renal pelvis	ENCFF966PVO
DNase-seq	renal pelvis	ENCFF407GRH
DNase-seq	astrocyte of the spinal cord	ENCFF674LBB
DNase-seq	astrocyte of the spinal cord	ENCFF452BSD
DNase-seq	right kidney	ENCFF186VEE
DNase-seq	pancreas	ENCFF897PRD
DNase-seq	muscle of back	ENCFF847WTW
DNase-seq	CD14-positive monocyte	ENCFF815GDP
DNase-seq	common myeloid progenitor, CD34-positive	ENCFF450BGX
DNase-seq	small intestine	ENCFF564SMU
DNase-seq	CD8-positive, alpha-beta T cell	ENCFF926OPP
DNase-seq	GM12865	ENCFF745COY
DNase-seq	GM12865	ENCFF004PBJ
DNase-seq	left kidney	ENCFF755CVA
DNase-seq	left lung	ENCFF986LLS
DNase-seq	common myeloid progenitor, CD34-positive	ENCFF856BCY
DNase-seq	lung	ENCFF230CHA
DNase-seq	left lung	ENCFF986ZJB
DNase-seq	small intestine	ENCFF442AYJ
DNase-seq	left renal pelvis	ENCFF132BIV
DNase-seq	heart	ENCFF193PBQ
DNase-seq	kidney	ENCFF732RRW
DNase-seq	right lung	ENCFF046QJY
DNase-seq	left lung	ENCFF945DQY
DNase-seq	forelimb muscle	ENCFF850STV
DNase-seq	small intestine	ENCFF599BMR
DNase-seq	renal cortex interstitium	ENCFF718CUQ
DNase-seq	large intestine	ENCFF494EIC
DNase-seq	neural stem progenitor cell	ENCFF687UQV
DNase-seq	brain	ENCFF207IYJ
DNase-seq	muscle of arm	ENCFF332PPZ
DNase-seq	common myeloid progenitor, CD34-positive	ENCFF110CYC
DNase-seq	placenta	ENCFF880QTT
DNase-seq	renal pelvis	ENCFF386RDS
DNase-seq	left renal cortex interstitium	ENCFF206SZY
DNase-seq	left renal cortex interstitium	ENCFF947VSW
DNase-seq	placenta	ENCFF005DMK
DNase-seq	renal pelvis	ENCFF041XBL
DNase-seq	muscle of arm	ENCFF099MBG
DNase-seq	common myeloid progenitor, CD34-positive	ENCFF929VDK
DNase-seq	CD4-positive, alpha-beta T cell	ENCFF191WFG
DNase-seq	HAP-1	ENCFF953MDZ
DNase-seq	HAP-1	ENCFF665MFK
DNase-seq	hematopoietic multipotent progenitor cell	ENCFF570PDT
DNase-seq	stomach	ENCFF516KID
DNase-seq	NAMALWA Treated	ENCFF878HVG
DNase-seq	NAMALWA Treated	ENCFF710SFP
DNase-seq	iPS DF 6.9	ENCFF530BVP
DNase-seq	fibroblast of skin of scalp	ENCFF163TAJ
DNase-seq	fibroblast of mammary gland	ENCFF387KMX
DNase-seq	fibroblast of mammary gland	ENCFF042ALK
DNase-seq	AG04449	ENCFF308QOO
DNase-seq	AG04449	ENCFF973CKA
DNase-seq	placenta	ENCFF564VUG
DNase-seq	fibroblast of skin of upper back	ENCFF073TWU
DNase-seq	muscle of back	ENCFF797QID
DNase-seq	foreskin keratinocyte	ENCFF719FAT
DNase-seq	muscle of arm	ENCFF338NUC
DNase-seq	right lung	ENCFF136FZU
DNase-seq	left kidney	ENCFF614ZJX
DNase-seq	adrenal gland	ENCFF582VIH
DNase-seq	T-cell	ENCFF216NXR
DNase-seq	small intestine	ENCFF692AJW
DNase-seq	stomach	ENCFF637ZID
DNase-seq	MCF-7	ENCFF846DFL
DNase-seq	MCF-7	ENCFF078RSH
DNase-seq	large intestine	ENCFF555ZGP
DNase-seq	muscle of leg	ENCFF630VNL
DNase-seq	epithelial cell of prostate	ENCFF608WCU
DNase-seq	epithelial cell of prostate	ENCFF238YWY
DNase-seq	kidney	ENCFF729VHV
DNase-seq	spinal cord	ENCFF038VGE
DNase-seq	stomach	ENCFF490TJL
DNase-seq	B cell	ENCFF581UTE
DNase-seq	B cell	ENCFF263YRO
DNase-seq	muscle of arm	ENCFF715BDS
DNase-seq	muscle of trunk	ENCFF562NMD
DNase-seq	HCT116	ENCFF175RBN
DNase-seq	HCT116	ENCFF228YKV
DNase-seq	epithelial cell of proximal tubule	ENCFF218MZJ
DNase-seq	epithelial cell of proximal tubule	ENCFF231GLQ
DNase-seq	right renal pelvis	ENCFF033GXT
DNase-seq	right lung	ENCFF344IND
DNase-seq	fibroblast of the aortic adventitia	ENCFF990HMA
DNase-seq	fibroblast of the aortic adventitia	ENCFF904WZA
DNase-seq	T-helper 2 cell	ENCFF852NHM
DNase-seq	common myeloid progenitor, CD34-positive	ENCFF388FUA
DNase-seq	left kidney	ENCFF476LDM
DNase-seq	common myeloid progenitor, CD34-positive	ENCFF365IGK
DNase-seq	dermis blood vessel endothelial cell	ENCFF614FYH
DNase-seq	dermis blood vessel endothelial cell	ENCFF780DOD
DNase-seq	small intestine	ENCFF941FIK
DNase-seq	spinal cord	ENCFF789TOW
DNase-seq	heart	ENCFF797TTK
DNase-seq	muscle of arm	ENCFF991WDM
DNase-seq	adrenal gland	ENCFF319ZSH
DNase-seq	hepatocyte	ENCFF999DAS
DNase-seq	hepatocyte	ENCFF978ZAH
DNase-seq	brain	ENCFF103UPI
DNase-seq	uterus	ENCFF438AUW
DNase-seq	muscle of back	ENCFF414BFO
DNase-seq	thymus	ENCFF959FMP
DNase-seq	stomach	ENCFF962TZR
DNase-seq	thymus	ENCFF984RKH
DNase-seq	right renal cortex interstitium	ENCFF251NTZ
DNase-seq	renal cortex interstitium	ENCFF248VSR
DNase-seq	CD4-positive, alpha-beta T cell	ENCFF023ZMS
DNase-seq	muscle of back	ENCFF191JLB
DNase-seq	CD4-positive, alpha-beta T cell	ENCFF338UFC
DNase-seq	T-helper 1 cell	ENCFF654MRJ
DNase-seq	T-helper 1 cell	ENCFF012QDX
DNase-seq	muscle of leg	ENCFF572RTJ
DNase-seq	muscle of leg	ENCFF609KNI
DNase-seq	left renal pelvis	ENCFF504EOC
DNase-seq	lung microvascular endothelial cell	ENCFF165ZIA
DNase-seq	lung microvascular endothelial cell	ENCFF460ZFL
DNase-seq	small intestine	ENCFF722CYJ
DNase-seq	fibroblast of skin of left biceps	ENCFF336MQK
DNase-seq	thymus	ENCFF947RDC
DNase-seq	left lung	ENCFF059HII
DNase-seq	muscle of arm	ENCFF523TKA
DNase-seq	cardiac fibroblast	ENCFF957GSL
DNase-seq	cardiac fibroblast	ENCFF092IXN
DNase-seq	left lung	ENCFF130KKE
DNase-seq	large intestine	ENCFF805JKJ
DNase-seq	large intestine	ENCFF196VQQ
DNase-seq	muscle of leg	ENCFF319CPJ
DNase-seq	muscle of back	ENCFF081UUE
DNase-seq	foreskin melanocyte	ENCFF331ODX
DNase-seq	large intestine	ENCFF811USD
DNase-seq	foreskin fibroblast	ENCFF169THH
DNase-seq	natural killer cell	ENCFF133YNT
DNase-seq	left kidney	ENCFF311ACF
DNase-seq	right kidney	ENCFF468OWC
DNase-seq	muscle of leg	ENCFF470QNA
DNase-seq	right kidney	ENCFF119HGJ
DNase-seq	B cell	ENCFF403PJS
DNase-seq	adrenal gland	ENCFF525FRH
DNase-seq	muscle of leg	ENCFF659BCP
DNase-seq	muscle of arm	ENCFF172LKJ
DNase-seq	renal cortex interstitium	ENCFF131FBL
DNase-seq	placenta	ENCFF166VSZ
DNase-seq	retinal pigment epithelial cell	ENCFF248RWN
DNase-seq	retinal pigment epithelial cell	ENCFF915CHV
DNase-seq	pancreas	ENCFF735JRV
DNase-seq	muscle of back	ENCFF284MUO
DNase-seq	left renal pelvis	ENCFF276XHO
DNase-seq	renal pelvis	ENCFF293PGI
DNase-seq	renal cortex interstitium	ENCFF998JMX
DNase-seq	lung	ENCFF357EZI
DNase-seq	small intestine	ENCFF751OEX
DNase-seq	SK-N-MC	ENCFF192DXB
DNase-seq	SK-N-MC	ENCFF888JLF
DNase-seq	muscle of back	ENCFF540HZS
DNase-seq	stomach	ENCFF208QNH
DNase-seq	left renal cortex interstitium	ENCFF307XDO
DNase-seq	heart	ENCFF874KUM
DNase-seq	muscle of back	ENCFF583HUF
DNase-seq	BE2C	ENCFF147CSC
DNase-seq	BE2C	ENCFF954RNY
DNase-seq	stomach	ENCFF199RXV
DNase-seq	kidney	ENCFF330CNE
DNase-seq	common myeloid progenitor, CD34-positive	ENCFF725QIG
DNase-seq	common myeloid progenitor, CD34-positive	ENCFF743UIM
DNase-seq	fibroblast of lung	ENCFF331SYD
DNase-seq	fibroblast of lung	ENCFF681UOZ
DNase-seq	small intestine	ENCFF063OCF
DNase-seq	right renal cortex interstitium	ENCFF108GEI
DNase-seq	muscle of back	ENCFF284QST
DNase-seq	trophoblast cell	ENCFF533MFM
DNase-seq	trophoblast cell	ENCFF855CMV
DNase-seq	right kidney	ENCFF216UBC
DNase-seq	stomach	ENCFF360CCE
DNase-seq	lung	ENCFF712AKP
DNase-seq	testis	ENCFF012QTD
DNase-seq	GM12878	ENCFF097LEF
DNase-seq	GM12878	ENCFF273MVV
DNase-seq	kidney	ENCFF056MTI
DNase-seq	muscle of leg	ENCFF674ZTX
DNase-seq	right kidney	ENCFF286LLG
DNase-seq	placenta	ENCFF557HFW
DNase-seq	placenta	ENCFF181GIN
DNase-seq	heart	ENCFF833JBU
DNase-seq	brain	ENCFF530CGM
DNase-seq	right renal pelvis	ENCFF374BCD
DNase-seq	renal pelvis	ENCFF535KCZ
DNase-seq	right kidney	ENCFF610JVS
DNase-seq	iPS DF 4.7	ENCFF270BAF
DNase-seq	foreskin keratinocyte	ENCFF637CAJ
DNase-seq	transverse colon	ENCFF161NFM
DNase-seq	large intestine	ENCFF058ACJ
DNase-seq	brain	ENCFF722OVO
DNase-seq	renal cortical epithelial cell	ENCFF659MOZ
DNase-seq	renal cortical epithelial cell	ENCFF583YED
DNase-seq	muscle of arm	ENCFF307VFD
DNase-seq	left kidney	ENCFF567LLQ
DNase-seq	H7	ENCFF520HRA
DNase-seq	H7	ENCFF870MCD
DNase-seq	right kidney	ENCFF254ICV
DNase-seq	large intestine	ENCFF523ZGF
DNase-seq	muscle of arm	ENCFF326SSU
DNase-seq	foreskin fibroblast	ENCFF090PQC
DNase-seq	foreskin fibroblast	ENCFF032LRL
DNase-seq	renal pelvis	ENCFF449PAL
DNase-seq	dermis blood vessel endothelial cell	ENCFF823QRP
DNase-seq	dermis blood vessel endothelial cell	ENCFF084LGH
DNase-seq	CD4-positive, alpha-beta T cell	ENCFF109RSW
DNase-seq	HL-60	ENCFF185LPE
DNase-seq	HL-60	ENCFF505KHS
DNase-seq	CD8-positive, alpha-beta T cell	ENCFF663INK
DNase-seq	renal cortex interstitium	ENCFF051UGM
DNase-seq	cardiac muscle cell Treated	ENCFF664DCZ
DNase-seq	cardiac muscle cell Treated	ENCFF097RTD
DNase-seq	renal pelvis	ENCFF436EPI
DNase-seq	spinal cord	ENCFF817OHQ
DNase-seq	brain	ENCFF375XEP
DNase-seq	left renal pelvis	ENCFF352EVQ
DNase-seq	muscle of leg	ENCFF579QTP
DNase-seq	adrenal gland	ENCFF215UXZ
DNase-seq	right renal pelvis	ENCFF652KUN
DNase-seq	right renal pelvis	ENCFF360OCL
DNase-seq	EL	ENCFF153SDP
DNase-seq	EL	ENCFF513DVK
DNase-seq	left renal cortex interstitium	ENCFF531SWI
DNase-seq	renal pelvis	ENCFF012SAA
DNase-seq	small intestine	ENCFF917YWY
DNase-seq	choroid plexus epithelial cell	ENCFF719FXT
DNase-seq	choroid plexus epithelial cell	ENCFF512IPA
DNase-seq	skeletal muscle cell	ENCFF203SSC
DNase-seq	thymus	ENCFF711IJR
DNase-seq	mesendoderm	ENCFF456VYF
DNase-seq	muscle of leg	ENCFF230WVU
DNase-seq	muscle of arm	ENCFF711VFJ
DNase-seq	thyroid gland	ENCFF116OFN
DNase-seq	GM23248	ENCFF959RZS
DNase-seq	GM23248	ENCFF665HCW
DNase-seq	natural killer cell	ENCFF840ZTK
DNase-seq	B cell	ENCFF159HJV
DNase-seq	SK-N-DZ Treated	ENCFF768WKW
DNase-seq	SK-N-DZ Treated	ENCFF865LCY
DNase-seq	fibroblast of villous mesenchyme	ENCFF311UAO
DNase-seq	fibroblast of villous mesenchyme	ENCFF221FPW
DNase-seq	renal pelvis	ENCFF372NZP
DNase-seq	GM23338	ENCFF146IFL
DNase-seq	GM23338	ENCFF810HAS
DNase-seq	SK-MEL-5	ENCFF600JNF
DNase-seq	SK-MEL-5	ENCFF862XVF
DNase-seq	T-cell	ENCFF547UCK
DNase-seq	large intestine	ENCFF413NVW
DNase-seq	NB4	ENCFF041CSB
DNase-seq	NB4	ENCFF925ZDU
DNase-seq	CD8-positive, alpha-beta T cell	ENCFF109VIJ
DNase-seq	HFF-Myc	ENCFF842ESG
DNase-seq	HFF-Myc	ENCFF393CAW
DNase-seq	WI38 Treated	ENCFF582GQG
DNase-seq	WI38 Treated	ENCFF267YMX
DNase-seq	ELR	ENCFF899ISV
DNase-seq	ELR	ENCFF304NJX
DNase-seq	WI38	ENCFF314TNS
DNase-seq	WI38	ENCFF369ALL
DNase-seq	dermis microvascular lymphatic vessel endothelial cell	ENCFF734QSB
DNase-seq	dermis microvascular lymphatic vessel endothelial cell	ENCFF878LVP
DNase-seq	transverse colon	ENCFF484TLE
DNase-seq	KBM-7	ENCFF384AQH
DNase-seq	KBM-7	ENCFF499HUD
DNase-seq	Karpas-422	ENCFF911FIA
DNase-seq	Karpas-422	ENCFF365XCB
DNase-seq	myotube	ENCFF704WQC
DNase-seq	myotube	ENCFF854VIP
DNase-seq	OCI-LY7	ENCFF260PQV
DNase-seq	OCI-LY7	ENCFF696LIK
DNase-seq	amniotic epithelial cell	ENCFF316LBU
DNase-seq	amniotic epithelial cell	ENCFF727SDN
DNase-seq	bronchial epithelial cell Treated	ENCFF552CWN
DNase-seq	bronchial epithelial cell Treated	ENCFF661YBX
DNase-seq	AG09309	ENCFF952FSO
DNase-seq	AG09309	ENCFF034CJK
DNase-seq	bipolar neuron Treated	ENCFF950DMO
DNase-seq	bipolar neuron Treated	ENCFF524XCQ
DNase-seq	cardiac muscle cell	ENCFF156RTG
DNase-seq	cardiac muscle cell	ENCFF862ZMZ
DNase-seq	PC-9	ENCFF040AJP
DNase-seq	PC-9	ENCFF364RGE
DNase-seq	hematopoietic multipotent progenitor cell Treated	ENCFF721SJU
DNase-seq	hematopoietic multipotent progenitor cell Treated	ENCFF733JSK
DNase-seq	transverse colon	ENCFF562ESR
DNase-seq	hematopoietic multipotent progenitor cell	ENCFF241GBQ
DNase-seq	hematopoietic multipotent progenitor cell	ENCFF986DGM
DNase-seq	hematopoietic multipotent progenitor cell Treated	ENCFF495SEM
DNase-seq	hematopoietic multipotent progenitor cell Treated	ENCFF822FIY
DNase-seq	upper lobe of left lung	ENCFF121XJN
DNase-seq	body of pancreas	ENCFF706BCL
DNase-seq	WERI-Rb-1	ENCFF040LTQ
DNase-seq	WERI-Rb-1	ENCFF362PAJ
DNase-seq	stomach	ENCFF241TQC
DNase-seq	heart right ventricle	ENCFF687FIQ
DNase-seq	heart right ventricle	ENCFF250FRA
DNase-seq	adrenal gland	ENCFF179WUI
DNase-seq	islet precursor cell	ENCFF103OZQ
DNase-seq	prostate gland	ENCFF391OGO
DNase-seq	right atrium auricular region	ENCFF918YIN
DNase-seq	thyroid gland	ENCFF666SXY
DNase-seq	ovary	ENCFF173CIO
DNase-seq	right atrium auricular region	ENCFF364XUA
DNase-seq	naive thymus-derived CD4-positive, alpha-beta T cell	ENCFF602XCK
DNase-seq	brain	ENCFF303THQ
DNase-seq	brain	ENCFF331KXA
DNase-seq	vagina	ENCFF538ASZ
DNase-seq	stomach	ENCFF229RBJ
DNase-seq	stomach	ENCFF104PLB
DNase-seq	stomach	ENCFF543NNF
DNase-seq	liver	ENCFF286LYP
DNase-seq	heart left ventricle	ENCFF939RCS
DNase-seq	right lobe of liver	ENCFF752PFI
DNase-seq	tibial artery	ENCFF378BUF
DNase-seq	ascending aorta	ENCFF603RPR
DNase-seq	kidney	ENCFF403LQM
DNase-seq	kidney	ENCFF288VDM
DNase-seq	omental fat pad	ENCFF914GVC
DNase-seq	Peyer's patch	ENCFF732XMH
DNase-seq	coronary artery	ENCFF021ZDC
DNase-seq	breast epithelium	ENCFF336OGZ
DNase-seq	esophagus squamous epithelium	ENCFF197ZNE
DNase-seq	endothelial cell of umbilical vein	ENCFF330HEK
DNase-seq	endothelial cell of umbilical vein	ENCFF097KBE
DNase-seq	tibial nerve	ENCFF424BYY
DNase-seq	spleen	ENCFF609AWS
DNase-seq	gastrocnemius medialis	ENCFF758SYE
DNase-seq	foreskin fibroblast	ENCFF479KXR
DNase-seq	foreskin fibroblast	ENCFF329APP
DNase-seq	transverse colon	ENCFF142WAA
DNase-seq	Peyer's patch	ENCFF055ZSF
DNase-seq	AG10803	ENCFF062LRW
DNase-seq	AG10803	ENCFF964MRO
DNase-seq	epithelial cell of esophagus	ENCFF527EJQ
DNase-seq	epithelial cell of esophagus	ENCFF184TWB
DNase-seq	astrocyte of the cerebellum	ENCFF819ZIM
DNase-seq	astrocyte of the cerebellum	ENCFF057PEY
DNase-seq	endodermal cell	ENCFF222SCR
DNase-seq	endodermal cell	ENCFF073TCP
DNase-seq	brain microvascular endothelial cell	ENCFF833HUK
DNase-seq	brain microvascular endothelial cell	ENCFF224NMM
DNase-seq	AG04450	ENCFF991QFJ
DNase-seq	AG04450	ENCFF911OBG
DNase-seq	AG09319	ENCFF507FBF
DNase-seq	AG09319	ENCFF413SVK
DNase-seq	fibroblast of lung	ENCFF644XOI
DNase-seq	fibroblast of lung	ENCFF334RSR
DNase-seq	HFFc6	ENCFF931JXH
DNase-seq	HFFc6	ENCFF643IDL
DNase-seq	Jurkat clone E61	ENCFF304GVP
DNase-seq	Jurkat clone E61	ENCFF688ZSR
DNase-seq	HS-5	ENCFF331SCZ
DNase-seq	lung	ENCFF169QJZ
DNase-seq	lung	ENCFF547ZRE
DNase-seq	stomach	ENCFF151DGI
DNase-seq	tibial artery	ENCFF861DSY
DNase-seq	placenta	ENCFF655ZJF
DNase-seq	smooth muscle cell of the brain vasculature	ENCFF788MXD
DNase-seq	smooth muscle cell of the brain vasculature	ENCFF268UJI
DNase-seq	kidney	ENCFF215RET
DNase-seq	kidney	ENCFF050XEY
DNase-seq	brain	ENCFF218ZFS
DNase-seq	brain	ENCFF904HGV
DNase-seq	kidney epithelial cell	ENCFF752VHK
DNase-seq	kidney epithelial cell	ENCFF358CBP
DNase-seq	astrocyte	ENCFF399UZY
DNase-seq	astrocyte	ENCFF803JHO
DNase-seq	fibroblast of gingiva	ENCFF063MTX
DNase-seq	fibroblast of gingiva	ENCFF741BMK
DNase-seq	Caco-2	ENCFF541GPX
DNase-seq	Caco-2	ENCFF929UQL
DNase-seq	eye	ENCFF984RUT
DNase-seq	eye	ENCFF720MLF
DNase-seq	BJ	ENCFF169SUG
DNase-seq	BJ	ENCFF824OPX
DNase-seq	dermis microvascular lymphatic vessel endothelial cell	ENCFF606XQS
DNase-seq	dermis microvascular lymphatic vessel endothelial cell	ENCFF366UHV
DNase-seq	CD14-positive monocyte	ENCFF289XSM
DNase-seq	skeletal muscle myoblast	ENCFF962IGI
DNase-seq	skeletal muscle myoblast	ENCFF223UWR
DNase-seq	K562	ENCFF623AFX
DNase-seq	T-helper 2 cell	ENCFF420UQF
DNase-seq	T-helper 2 cell	ENCFF144XMY
DNase-seq	astrocyte of the hippocampus	ENCFF698ZFJ
DNase-seq	astrocyte of the hippocampus	ENCFF662JPI
DNase-seq	heart	ENCFF830NSD
DNase-seq	heart	ENCFF422GYH
DNase-seq	retina	ENCFF015ULH
DNase-seq	retina	ENCFF402DMO
DNase-seq	heart left ventricle	ENCFF409QXF
DNase-seq	heart left ventricle	ENCFF520HKD
DNase-seq	retina	ENCFF828VUZ
DNase-seq	retina	ENCFF679MSO
DNase-seq	upper lobe of left lung	ENCFF271JAF
DNase-seq	lower leg skin	ENCFF011JIY
DNase-seq	tibial nerve	ENCFF694IEM
DNase-seq	Daoy	ENCFF221FND
DNase-seq	Daoy	ENCFF948FCS
DNase-seq	mammary epithelial cell	ENCFF672BMB
DNase-seq	mammary epithelial cell	ENCFF757LPN
DNase-seq	stromal cell of bone marrow	ENCFF254WCU
DNase-seq	stromal cell of bone marrow	ENCFF547MHR
DNase-seq	cardiac myoblast Treated	ENCFF652LBV
DNase-seq	lung	ENCFF625XNX
DNase-seq	tongue	ENCFF259KDP
DNase-seq	tongue	ENCFF814UZW

## Sheet: S1.3 Lymphoid Lineage
Supplemental Table S1.3: Lymphoid lineage. Accession file IDs of DNase-seq datasets used in this study for the analysis of the hematopoietic lineage (Supplemental Figure S10)
Experiment Type	Cell Type	Accession ID
DNase-seq	Bcell	ENCFF159HJV
DNase-seq	Bcell	ENCFF403PJS
DNase-seq	CM	ENCFF156RTG
DNase-seq	CM	ENCFF862ZMZ
DNase-seq	H1-hESC	ENCFF050KLL
DNase-seq	H1-hESC	ENCFF065XPI
DNase-seq	hemaMPP	ENCFF241GBQ
DNase-seq	hemaMPP	ENCFF986DGM
DNase-seq	natKiller	ENCFF133YNT
DNase-seq	natKiller	ENCFF675NXI
DNase-seq	Th1	ENCFF012QDX
DNase-seq	Th1	ENCFF654MRJ
DNase-seq	Th2	ENCFF481KKG
DNase-seq	Th2	ENCFF852NHM

## Sheet: S1.4 Motifs
Supplemental Table S1.4: TF Motifs. Accession file IDs for the PWMs used in this study.
Experiment Type	TF	Accession ID
Benchmarking	TFAP2A	M5912
Benchmarking	JUND	M0320
Benchmarking	CEBPB	M5314
Benchmarking	ELF1	M5373
Benchmarking	FOXA2	M0729
Benchmarking	GATA6	M0782
Benchmarking	IRF4	M5573
Benchmarking	KLF12	M6040
Benchmarking	MAFB	M0321
Benchmarking	POU3F4	M5739
Benchmarking	SOX4	M1578
Benchmarking	TEAD1	M5904
Benchmarking	ZIC1	M5963
Explorative	AR	M1456
Explorative	BCL6b	M0391
Explorative	CDX2	M5313
Explorative	CEBPB	M5314
Explorative	CPEB1	M5322
Explorative	CTCF	M5331
Explorative	E2F1	M5350
Explorative	EBF1	M5364
Explorative	ELF1	M5373
Explorative	ESR1	M5403
Explorative	ESR2	M6219
Explorative	FLI1	M5431
Explorative	FOXA2	M0729
Explorative	FOXB1	M5438
Explorative	GATA6	M0782
Explorative	GCM1	M5484
Explorative	GLI2	M5489
Explorative	GRHL1	M5498
Explorative	HIC2	M5512
Explorative	HINFP	M5513
Explorative	HLF	M5516
Explorative	HNF4A	M5524
Explorative	HOXD9	M6035
Explorative	HSF4	M5567
Explorative	ID4	M5571
Explorative	IRF4	M5573
Explorative	IRX2	M5581
Explorative	IRX5	M5582
Explorative	ISL2	M5583
Explorative	JUND	M0320
Explorative	KLF12	M6040
Explorative	LHX4	M6041
Explorative	MAFB	M0321
Explorative	MEF2A	M5615
Explorative	MEF2B	M5616
Explorative	MEIS2	M0965
Explorative	MESP1	M5627
Explorative	MYBL1	M5645
Explorative	MYF6	M0210
Explorative	NEUROG2	M5653
Explorative	NFATC2	M1518
Explorative	NFIA	M5661
Explorative	NFIX	M5665
Explorative	NFKB1	M5668
Explorative	NRF1	M5688
Explorative	OLIG1	M5690
Explorative	ONECUT	M5694
Explorative	OTX1	M5699
Explorative	P53	M6105
Explorative	PAX5	M4705
Explorative	PHOX2B	M5715
Explorative	POU3F4	M5739
Explorative	PRDM1	M5749
Explorative	PRDM3	M1861
Explorative	PRDM4	M5750
Explorative	PROX1	M5753
Explorative	RFX4	UP00056 primary
Explorative	RFX4	UP00056 secondary
Explorative	RUNX3	M5792
Explorative	RXRG	M1440
Explorative	SETBP1	M0130
Explorative	SFPI1	M5863
Explorative	SMAD3	M5808
Explorative	SMARCE1	M1582
Explorative	SNAI2	M5809
Explorative	SOX4	M1578
Explorative	STAT1	M1955
Explorative	TBX5	M1627
Explorative	TCF3	M5900
Explorative	TCF7	M6099
Explorative	TEAD1	M5904
Explorative	TERF2	M1358
Explorative	TFAP2A	M5912
Explorative	TFCP2	M5928
Explorative	THRA	M6521
Explorative	TWIST2	M0177
Explorative	USF2	M0225
Explorative	VDR	M5946
Explorative	VENTX	M0896
Explorative	VENTX	M5947
Explorative	XBP1	M5952
Explorative	YY1	M5954
Explorative	ZBED1	M5958
Explorative	ZBTB12	M0433
Explorative	ZBTB18	M5968
Explorative	ZBTB1	M0413
Explorative	ZBTB3	M0442
Explorative	ZBTB49	M5959
Explorative	ZBTB7A	M5960
Explorative	ZIC1	M5963
Explorative	ZKSCAN3	M5971
Explorative	ZNF143	M4484
Explorative	ZNF143	M5966
Explorative	ZNF202	M0404
Explorative	ZNF232	M5967
Explorative	ZNF263	M0397
Explorative	ZNF354C	M1950
Explorative	ZNF524	M5974
Explorative	ZNF784	M5980
Lymphoid Lineage	E2A	M5900
Lymphoid Lineage	EBF1	M5364
Lymphoid Lineage	ELF1	M5373
Lymphoid Lineage	GATA6	M0782
Lymphoid Lineage	KLF12	M6040
Lymphoid Lineage	Nanog	M0926
Lymphoid Lineage	NFIL3	M5663
Lymphoid Lineage	POU5F1	M1959
Lymphoid Lineage	PU.1	M5863
Lymphoid Lineage	RUNX3	M5792
Lymphoid Lineage	SOX4	M1578
Lymphoid Lineage	TBX21	M5890
Lymphoid Lineage	TCF7	M6099
Lymphoid Lineage	TEAD1-4	M5904
Lymphoid Lineage	ZIC1	M5963
