# Supplementary material for: MEDEA: analysis of transcription factor binding motifs in accessible chromatin
Source: HighWire-hosted journal article supplement (doi:10.1101/gr.260877.120), 2020-05-01
Supplement: Supplemental_Table_S2.xlsx [file Supplemental_Table_S2.xlsx]

## Sheet: S2 DNase-seq Benchmarking
Supplemental Table S2: Percentage of input peaks required for best 500 peaks after MEDEA filtering.
Percentage of benchmarking DNase-seq peaks needed to get 500 peaks after MEDEA reference set subtraction
		ENCODE-DREAM DNase-seq reference set
		A549	GM12878	H1-hESC	HCT116	HeLa-S3	HepG2	IMR90	iPSC	K562	MCF-7	Panc1	PC-3	medians
Benchmarking DNase-seq dataset	A549	N/A	0.0230851	0.023761	0.0590936	0.0986913	0.0598045	0.077867	0.0260567	0.0338177	0.104565	0.0822719	0.108177	0.0598045
	GM12878	0.0500741	N/A	0.048164	0.0483425	0.0489673	0.048521	0.0576075	0.0501098	0.0647125	0.0559294	0.0509131	0.0543942	0.0501098
	H1-hESC	0.101831	0.0854492	N/A	0.0985758	0.082698	0.0974969	0.0969575	0.633532	0.09845	0.111271	0.0914011	0.0988815	0.09845
	HCT116	0.12602	0.0401381	0.0380303	N/A	0.130494	0.0692887	0.0949749	0.0400933	0.0536932	0.107229	0.106826	0.186889	0.0949749
	HeLa-S3	0.0406415	0.00760586	0.00759098	0.0204138	N/A	0.0141252	0.0274317	0.00846171	0.0105381	0.0354171	0.0219097	0.0447868	0.0204138
	HepG2	0.0249037	0.0110769	0.0115165	0.0146112	0.0155508	N/A	0.0154732	0.0124303	0.0136371	0.0248433	0.0151112	0.0174989	0.0151112
	IMR90	0.0757551	0.0250575	0.0242949	0.0478964	0.0686691	0.0404082	N/A	0.025432	0.0327537	0.0559531	0.0658125	0.0920071	0.0478964
	iPSC	0.013173	0.0114126	0.132024	0.0124605	0.0113781	0.013007	0.0134911	N/A	0.0129758	0.0150681	0.0118622	0.0129551	0.0129758
	K562	0.0765765	0.0761633	0.0895375	0.0844075	0.0742383	0.0747221	0.0764858	0.0996765	N/A	0.0822104	0.0654297	0.0794187	0.0765765
	MCF-7	0.0187782	0.00907545	0.0110805	0.0160462	0.0176936	0.0151609	0.0134666	0.0119482	0.0109808	N/A	0.0142112	0.0430908	0.0142112
	Panc1	0.196348	0.0363037	0.0311506	0.115903	0.144105	0.0730382	0.163458	0.0337023	0.0482337	0.129606	N/A	0.247133	0.115903
	PC-3	0.0242573	0.00672869	0.00658623	0.0210025	0.0290956	0.0111232	0.0249312	0.00685472	0.00842183	0.0301476	0.0247997	N/A	0.0210025
