# Supplementary material for: MEDEA: analysis of transcription factor binding motifs in accessible chromatin
Source: HighWire-hosted journal article supplement (doi:10.1101/gr.260877.120), 2020-05-01
Supplement: Supplemental_Table_S3.xlsx [file Supplemental_Table_S3.xlsx]

## Sheet: S3.1 AUROC Values
Supplemental Table S3.1: AUROC values for the analysis of 610 ENCODE DNase-seq datasets. All the Motif-Datasets combinations in the left panel of Figure 4A.
ENCODE ID	Cell Type	Motif	Motif Type	AUROC of Unfiltered Peaks	AUROC of MEDEA-filtered peaks	AUROC difference
ENCFF973CKA	AG04449	bZIP	kmer	0.620444	0.614288	-0.006156
ENCFF034CJK	AG09309	bZIP	kmer	0.607314	0.601762	-0.005552
ENCFF316LBU	amniotic-epithelial-cell	bZIP	kmer	0.614824	0.614624	-0.0002
ENCFF727SDN	amniotic-epithelial-cell	bZIP	kmer	0.610556	0.622118	0.011562
ENCFF399UZY	astrocyte	bZIP	kmer	0.667652	0.64431	-0.023342
ENCFF399UZY	astrocyte	NR2E	kmer	0.611356	0.604464	-0.006892
ENCFF803JHO	astrocyte	bZIP	kmer	0.63131	0.66402	0.03271
ENCFF159HJV	B-cell	ETS	kmer	0.631392	0.69352	0.062128
ENCFF263YRO	B-cell	ETS	kmer	0.625996	0.657626	0.03163
ENCFF403PJS	B-cell	ETS	kmer	0.629772	0.68687	0.057098
ENCFF581UTE	B-cell	KLF	kmer	0.751148	0.635182	-0.115966
ENCFF824OPX	BJ	bZIP	kmer	0.625522	0.63951	0.013988
ENCFF224NMM	brain-microvascular-endothelial-cell	bZIP	kmer	0.691446	0.718576	0.02713
ENCFF224NMM	brain-microvascular-endothelial-cell	NR2E	kmer	0.612264	0.623308	0.011044
ENCFF833HUK	brain-microvascular-endothelial-cell	bZIP	kmer	0.694436	0.710204	0.015768
ENCFF833HUK	brain-microvascular-endothelial-cell	NR2E	kmer	0.628834	0.629396	0.000562
ENCFF336OGZ	breast-epithelium	KLF	kmer	0.740544	0.606188	-0.134356
ENCFF338GII	bronchial-epithelial-cell	bZIP	kmer	0.69526	0.68773	-0.00753
ENCFF546QUZ	bronchial-epithelial-cell	bZIP	kmer	0.70764	0.688262	-0.019378
ENCFF546QUZ	bronchial-epithelial-cell	NR2E	kmer	0.634734	0.621014	-0.01372
ENCFF541GPX	Caco-2	E2F_zfC2H2	kmer	0.61913	0.606752	-0.012378
ENCFF541GPX	Caco-2	KLF	kmer	0.705736	0.686596	-0.01914
ENCFF929UQL	Caco-2	E2F_zfC2H2	kmer	0.620782	0.615242	-0.00554
ENCFF929UQL	Caco-2	KLF	kmer	0.73903	0.673326	-0.065704
ENCFF528ZJQ	cardiac-fibroblast	bZIP	kmer	0.610782	0.703046	0.092264
ENCFF653KYK	cardiac-fibroblast	bZIP	kmer	0.714234	0.69998	-0.014254
ENCFF653KYK	cardiac-fibroblast	CEBP	kmer	0.613344	0.628666	0.015322
ENCFF653KYK	cardiac-fibroblast	NR2E	kmer	0.63387	0.63009	-0.00378
ENCFF652LBV	cardiac-myoblast	KLF	kmer	0.690888	0.622734	-0.068154
ENCFF063IUG	CD14-positive-monocyte	bZIP	kmer	0.65556	0.677572	0.022012
ENCFF063IUG	CD14-positive-monocyte	ETS	kmer	0.641592	0.722474	0.080882
ENCFF289XSM	CD14-positive-monocyte	ETS	kmer	0.629216	0.728776	0.09956
ENCFF424GPY	CD14-positive-monocyte	bZIP	kmer	0.677842	0.67198	-0.005862
ENCFF424GPY	CD14-positive-monocyte	ETS	kmer	0.675356	0.757434	0.082078
ENCFF815GDP	CD14-positive-monocyte	bZIP	kmer	0.671294	0.670324	-0.00097
ENCFF815GDP	CD14-positive-monocyte	ETSIII	kmer	0.606808	0.694694	0.087886
ENCFF815GDP	CD14-positive-monocyte	ETS	kmer	0.669812	0.725432	0.05562
ENCFF815GDP	CD14-positive-monocyte	NR2E	kmer	0.625338	0.62457	-0.000768
ENCFF815GDP	CD14-positive-monocyte	TALE_zfC2H2	kmer	0.604552	0.613708	0.009156
ENCFF815GDP	CD14-positive-monocyte	TFE3	kmer	0.605534	0.605826	0.000292
ENCFF096NVD	CD1c-positive-myeloid-dendritic-cell	ETS	kmer	0.619306	0.664916	0.04561
ENCFF096NVD	CD1c-positive-myeloid-dendritic-cell	KLF	kmer	0.679958	0.617128	-0.06283
ENCFF267VKD	CD1c-positive-myeloid-dendritic-cell	ETS	kmer	0.630414	0.702816	0.072402
ENCFF023ZMS	CD4-positive_-alpha-beta-T-cell	ETS	kmer	0.603232	0.678612	0.07538
ENCFF109RSW	CD4-positive_-alpha-beta-T-cell	ETS	kmer	0.634346	0.684916	0.05057
ENCFF191WFG	CD4-positive_-alpha-beta-T-cell	ETS	kmer	0.612466	0.690896	0.07843
ENCFF338UFC	CD4-positive_-alpha-beta-T-cell	ETS	kmer	0.639474	0.665276	0.025802
ENCFF703UHS	CD4-positive_-alpha-beta-T-cell	KLF	kmer	0.728686	0.631524	-0.097162
ENCFF109VIJ	CD8-positive_-alpha-beta-T-cell	ETS	kmer	0.628726	0.677304	0.048578
ENCFF512IML	CD8-positive_-alpha-beta-T-cell	ETS	kmer	0.61718	0.682576	0.065396
ENCFF512IML	CD8-positive_-alpha-beta-T-cell	KLF	kmer	0.726014	0.607874	-0.11814
ENCFF566SXQ	CD8-positive_-alpha-beta-T-cell	ETS	kmer	0.612528	0.674694	0.062166
ENCFF663INK	CD8-positive_-alpha-beta-T-cell	ETS	kmer	0.604374	0.702038	0.097664
ENCFF926OPP	CD8-positive_-alpha-beta-T-cell	ETS	kmer	0.617954	0.675528	0.057574
ENCFF437IAA	CMK	ETS	kmer	0.603326	0.690098	0.086772
ENCFF024DAR	common-myeloid-progenitor_-CD34-positive	ETS	kmer	0.625932	0.765558	0.139626
ENCFF059VUS	common-myeloid-progenitor_-CD34-positive	ETS	kmer	0.632382	0.771302	0.13892
ENCFF110CYC	common-myeloid-progenitor_-CD34-positive	ETS	kmer	0.651312	0.772718	0.121406
ENCFF171LSI	common-myeloid-progenitor_-CD34-positive	ETS	kmer	0.615262	0.751662	0.1364
ENCFF365IGK	common-myeloid-progenitor_-CD34-positive	ETS	kmer	0.684758	0.781868	0.09711
ENCFF388FUA	common-myeloid-progenitor_-CD34-positive	ETS	kmer	0.621772	0.779498	0.157726
ENCFF450BGX	common-myeloid-progenitor_-CD34-positive	ETS	kmer	0.669748	0.764292	0.094544
ENCFF725QIG	common-myeloid-progenitor_-CD34-positive	ETS	kmer	0.622794	0.757254	0.13446
ENCFF743UIM	common-myeloid-progenitor_-CD34-positive	ETS	kmer	0.623672	0.757174	0.133502
ENCFF854EJY	common-myeloid-progenitor_-CD34-positive	ETS	kmer	0.660486	0.761074	0.100588
ENCFF856BCY	common-myeloid-progenitor_-CD34-positive	ETS	kmer	0.668592	0.791038	0.122446
ENCFF929VDK	common-myeloid-progenitor_-CD34-positive	ETS	kmer	0.667624	0.779796	0.112172
ENCFF948FCS	Daoy	bZIP	kmer	0.617044	0.692316	0.075272
ENCFF045UNP	dermis-blood-vessel-endothelial-cell	ETS	kmer	0.60388	0.78832	0.18444
ENCFF419NYS	dermis-blood-vessel-endothelial-cell	bZIP	kmer	0.60407	0.616806	0.012736
ENCFF419NYS	dermis-blood-vessel-endothelial-cell	ETS	kmer	0.629634	0.787268	0.157634
ENCFF780DOD	dermis-blood-vessel-endothelial-cell	bZIP	kmer	0.611558	0.63547	0.023912
ENCFF780DOD	dermis-blood-vessel-endothelial-cell	ETS	kmer	0.688384	0.790114	0.10173
ENCFF823QRP	dermis-blood-vessel-endothelial-cell	ETS	kmer	0.6188	0.76198	0.14318
ENCFF366UHV	dermis-microvascular-lymphatic-vessel-endothelial-cell	ETS	kmer	0.607914	0.743226	0.135312
ENCFF606XQS	dermis-microvascular-lymphatic-vessel-endothelial-cell	ETS	kmer	0.606406	0.749488	0.143082
ENCFF734QSB	dermis-microvascular-lymphatic-vessel-endothelial-cell	ETS	kmer	0.64202	0.765714	0.123694
ENCFF878LVP	dermis-microvascular-lymphatic-vessel-endothelial-cell	ETS	kmer	0.632702	0.775016	0.142314
ENCFF153SDP	EL	bZIP	kmer	0.620408	0.693962	0.073554
ENCFF304NJX	ELR	bZIP	kmer	0.721186	0.751822	0.030636
ENCFF304NJX	ELR	NR2E	kmer	0.66938	0.680906	0.011526
ENCFF899ISV	ELR	bZIP	kmer	0.681252	0.753208	0.071956
ENCFF899ISV	ELR	NR2E	kmer	0.60911	0.670934	0.061824
ENCFF073TCP	endodermal-cell	KLF	kmer	0.75788	0.718106	-0.039774
ENCFF222SCR	endodermal-cell	KLF	kmer	0.772756	0.726656	-0.0461
ENCFF222SCR	endodermal-cell	zfC2H2_RHD	kmer	0.605866	0.663222	0.057356
ENCFF330HEK	endothelial-cell-of-umbilical-vein	bZIP	kmer	0.63772	0.648606	0.010886
ENCFF330HEK	endothelial-cell-of-umbilical-vein	ETS	kmer	0.654546	0.754884	0.100338
ENCFF184TWB	epithelial-cell-of-esophagus	bZIP	kmer	0.633096	0.642464	0.009368
ENCFF238YWY	epithelial-cell-of-prostate	bZIP	kmer	0.636254	0.652322	0.016068
ENCFF608WCU	epithelial-cell-of-prostate	bZIP	kmer	0.649352	0.661352	0.012
ENCFF608WCU	epithelial-cell-of-prostate	NR2E	kmer	0.602104	0.629874	0.02777
ENCFF218MZJ	epithelial-cell-of-proximal-tubule	bZIP	kmer	0.633646	0.63993	0.006284
ENCFF218MZJ	epithelial-cell-of-proximal-tubule	NR2E	kmer	0.621702	0.6186	-0.003102
ENCFF231GLQ	epithelial-cell-of-proximal-tubule	bZIP	kmer	0.655536	0.619592	-0.035944
ENCFF231GLQ	epithelial-cell-of-proximal-tubule	NR2E	kmer	0.617668	0.607264	-0.010404
ENCFF178BEG	fibroblast-of-dermis	bZIP	kmer	0.6226	0.619544	-0.003056
ENCFF178BEG	fibroblast-of-dermis	NR2E	kmer	0.623928	0.60531	-0.018618
ENCFF445GCV	fibroblast-of-dermis	bZIP	kmer	0.625306	0.602834	-0.022472
ENCFF331SYD	fibroblast-of-lung	bZIP	kmer	0.659198	0.673194	0.013996
ENCFF644XOI	fibroblast-of-lung	bZIP	kmer	0.60796	0.629574	0.021614
ENCFF681UOZ	fibroblast-of-lung	bZIP	kmer	0.68507	0.672364	-0.012706
ENCFF681UOZ	fibroblast-of-lung	NR2E	kmer	0.616954	0.61565	-0.001304
ENCFF042ALK	fibroblast-of-mammary-gland	bZIP	kmer	0.683954	0.69601	0.012056
ENCFF042ALK	fibroblast-of-mammary-gland	NR2E	kmer	0.63782	0.635122	-0.002698
ENCFF387KMX	fibroblast-of-mammary-gland	bZIP	kmer	0.64234	0.694052	0.051712
ENCFF387KMX	fibroblast-of-mammary-gland	NR2E	kmer	0.610318	0.617458	0.00714
ENCFF620HKT	fibroblast-of-peridontal-ligament	bZIP	kmer	0.627302	0.61862	-0.008682
ENCFF382NHI	fibroblast-of-skin-of-right-biceps	bZIP	kmer	0.60131	0.661764	0.060454
ENCFF469AJE	fibroblast-of-skin-of-upper-back	bZIP	kmer	0.60696	0.604544	-0.002416
ENCFF904WZA	fibroblast-of-the-aortic-adventitia	bZIP	kmer	0.600774	0.605862	0.005088
ENCFF032LRL	foreskin-fibroblast	bZIP	kmer	0.628092	0.620802	-0.00729
ENCFF637CAJ	foreskin-keratinocyte	bZIP	kmer	0.65794	0.66548	0.00754
ENCFF637CAJ	foreskin-keratinocyte	NR2E	kmer	0.616692	0.608578	-0.008114
ENCFF719FAT	foreskin-keratinocyte	bZIP	kmer	0.614396	0.625594	0.011198
ENCFF331ODX	foreskin-melanocyte	TFE3	kmer	0.605766	0.660366	0.0546
ENCFF927KUT	glomerular-endothelial-cell	bZIP	kmer	0.631798	0.60903	-0.022768
ENCFF927KUT	glomerular-endothelial-cell	ETS	kmer	0.633764	0.777428	0.143664
ENCFF993TCA	glomerular-endothelial-cell	bZIP	kmer	0.654586	0.655352	0.000766
ENCFF993TCA	glomerular-endothelial-cell	ETS	kmer	0.65346	0.790892	0.137432
ENCFF452WOT	GM04503	bZIP	kmer	0.624	0.602766	-0.021234
ENCFF452WOT	GM04503	TEA	kmer	0.60205	0.64364	0.04159
ENCFF553BZD	GM04503	bZIP	kmer	0.639994	0.612642	-0.027352
ENCFF486BHM	GM04504	bZIP	kmer	0.644024	0.666854	0.02283
ENCFF486BHM	GM04504	NR2E	kmer	0.633398	0.634846	0.001448
ENCFF097IKA	GM12864	ETS	kmer	0.627358	0.642006	0.014648
ENCFF004PBJ	GM12865	ETS	kmer	0.62283	0.631354	0.008524
ENCFF097LEF	GM12878	ETS	kmer	0.603794	0.64858	0.044786
ENCFF273MVV	GM12878	ETS	kmer	0.61821	0.62319	0.00498
ENCFF665HCW	GM23248	bZIP	kmer	0.610458	0.673406	0.062948
ENCFF146IFL	GM23338	KLF	kmer	0.681274	0.613686	-0.067588
ENCFF810HAS	GM23338	KLF	kmer	0.729412	0.649706	-0.079706
ENCFF006OZN	HeLa-S3	bZIP	kmer	0.682998	0.676592	-0.006406
ENCFF526VFR	HeLa-S3	bZIP	kmer	0.634172	0.650358	0.016186
ENCFF241GBQ	hematopoietic-multipotent-progenitor-cell	ETS	kmer	0.640874	0.763056	0.122182
ENCFF495SEM	hematopoietic-multipotent-progenitor-cell	ETS	kmer	0.617254	0.724972	0.107718
ENCFF570PDT	hematopoietic-multipotent-progenitor-cell	ETS	kmer	0.611748	0.746192	0.134444
ENCFF822FIY	hematopoietic-multipotent-progenitor-cell	ETS	kmer	0.610092	0.665086	0.054994
ENCFF866SPM	hematopoietic-multipotent-progenitor-cell	KLF	kmer	0.637428	0.60806	-0.029368
ENCFF986DGM	hematopoietic-multipotent-progenitor-cell	ETS	kmer	0.603242	0.767136	0.163894
ENCFF978ZAH	hepatocyte	KLF	kmer	0.679054	0.618268	-0.060786
ENCFF999DAS	hepatocyte	KLF	kmer	0.771248	0.674092	-0.097156
ENCFF767JPZ	HepG2	KLF	kmer	0.724294	0.634266	-0.090028
ENCFF910QEB	HepG2	KLF	kmer	0.699412	0.616518	-0.082894
ENCFF185LPE	HL-60	CEBP	kmer	0.61054	0.748948	0.138408
ENCFF185LPE	HL-60	ETS	kmer	0.631206	0.699062	0.067856
ENCFF505KHS	HL-60	ETS	kmer	0.606312	0.693266	0.086954
ENCFF932FKV	HS-27A	bZIP	kmer	0.608456	0.662112	0.053656
ENCFF331SCZ	HS-5	bZIP	kmer	0.689392	0.699946	0.010554
ENCFF895BJS	IMR-90	bZIP	kmer	0.674654	0.719938	0.045284
7	iPS-DF-4	ETS	kmer	0.620658	0.606348	-0.01431
ENCFF231PPP	iris-pigment-epithelial-cell	bZIP	kmer	0.688834	0.673894	-0.01494
ENCFF231PPP	iris-pigment-epithelial-cell	NR2E	kmer	0.62964	0.602432	-0.027208
ENCFF272LQP	iris-pigment-epithelial-cell	bZIP	kmer	0.600674	0.66279	0.062116
ENCFF304GVP	Jurkat-clone-E61	ETS	kmer	0.609558	0.671806	0.062248
ENCFF688ZSR	Jurkat-clone-E61	ETS	kmer	0.618992	0.683528	0.064536
ENCFF623AFX	K562	KLF	kmer	0.77649	0.65176	-0.12473
ENCFF384AQH	KBM-7	ETS	kmer	0.61391	0.798402	0.184492
ENCFF499HUD	KBM-7	ETSIII	kmer	0.629436	0.726778	0.097342
ENCFF499HUD	KBM-7	ETS	kmer	0.671224	0.810904	0.13968
ENCFF566JBQ	keratinocyte	bZIP	kmer	0.640106	0.657758	0.017652
ENCFF894LMB	keratinocyte	bZIP	kmer	0.671064	0.667936	-0.003128
ENCFF050XEY	kidney	KLF	kmer	0.768144	0.672236	-0.095908
ENCFF215RET	kidney	KLF	kmer	0.765672	0.673258	-0.092414
ENCFF215RET	kidney	zfC2H2_RHD	kmer	0.605294	0.699264	0.09397
ENCFF288VDM	kidney	KLF	kmer	0.768354	0.669354	-0.099
ENCFF288VDM	kidney	zfC2H2_RHD	kmer	0.609002	0.666184	0.057182
ENCFF330CNE	kidney	KLF	kmer	0.694166	0.61052	-0.083646
ENCFF403LQM	kidney	KLF	kmer	0.726472	0.626448	-0.100024
ENCFF744IAP	kidney	KLF	kmer	0.695076	0.6152	-0.079876
ENCFF358CBP	kidney-epithelial-cell	bZIP	kmer	0.712286	0.686986	-0.0253
ENCFF358CBP	kidney-epithelial-cell	NR2E	kmer	0.659996	0.615784	-0.044212
ENCFF752VHK	kidney-epithelial-cell	bZIP	kmer	0.675678	0.664614	-0.011064
ENCFF752VHK	kidney-epithelial-cell	NR2E	kmer	0.653516	0.621904	-0.031612
ENCFF794IVB	large-intestine	KLF	kmer	0.68907	0.633282	-0.055788
ENCFF811USD	large-intestine	KLF	kmer	0.67904	0.601504	-0.077536
ENCFF311ACF	left-kidney	KLF	kmer	0.695632	0.617568	-0.078064
ENCFF567LLQ	left-kidney	KLF	kmer	0.68018	0.608944	-0.071236
ENCFF286LYP	liver	KLF	kmer	0.816776	0.68454	-0.132236
ENCFF286LYP	liver	zfC2H2_RHD	kmer	0.610988	0.60116	-0.009828
ENCFF011JIY	lower-leg-skin	KLF	kmer	0.735844	0.63024	-0.105604
ENCFF446FTN	lung-microvascular-endothelial-cell	ETS	kmer	0.64463	0.769438	0.124808
ENCFF957JQC	lung-microvascular-endothelial-cell	ETS	kmer	0.617506	0.793654	0.176148
ENCFF238GMN	M059J	bZIP	kmer	0.65211	0.684994	0.032884
ENCFF238GMN	M059J	NR2E	kmer	0.615804	0.628536	0.012732
ENCFF767GYT	M059J	bZIP	kmer	0.66953	0.684266	0.014736
ENCFF767GYT	M059J	NR2E	kmer	0.62054	0.625212	0.004672
ENCFF757LPN	mammary-epithelial-cell	bZIP	kmer	0.665552	0.635496	-0.030056
ENCFF757LPN	mammary-epithelial-cell	CEBP	kmer	0.61522	0.617722	0.002502
ENCFF099MBG	muscle-of-arm	ETS	kmer	0.624566	0.604788	-0.019778
ENCFF307VFD	muscle-of-arm	ETS	kmer	0.647104	0.615596	-0.031508
ENCFF326SSU	muscle-of-arm	ETS	kmer	0.639428	0.613706	-0.025722
ENCFF332PPZ	muscle-of-arm	ETS	kmer	0.611732	0.606614	-0.005118
ENCFF523TKA	muscle-of-arm	ETS	kmer	0.63482	0.603176	-0.031644
ENCFF284MUO	muscle-of-back	ETS	kmer	0.665796	0.618176	-0.04762
ENCFF583HUF	muscle-of-back	ETS	kmer	0.62264	0.60023	-0.02241
ENCFF847WTW	muscle-of-back	ETS	kmer	0.601764	0.60264	0.000876
ENCFF230WVU	muscle-of-leg	ETS	kmer	0.607114	0.610784	0.00367
ENCFF319CPJ	muscle-of-leg	ETS	kmer	0.61408	0.607732	-0.006348
ENCFF542RWT	muscle-of-leg	ETS	kmer	0.641986	0.610886	-0.0311
ENCFF572RTJ	muscle-of-leg	ETS	kmer	0.625192	0.602856	-0.022336
ENCFF609KNI	muscle-of-leg	ETS	kmer	0.621484	0.62144	-4.4e-05
ENCFF602XCK	naive-thymus-derived-CD4-positive_-alpha-beta-T-cell	ETS	kmer	0.623638	0.689564	0.065926
ENCFF878HVG	NAMALWA	ETS	kmer	0.604916	0.624878	0.019962
ENCFF133YNT	natural-killer-cell	ETS	kmer	0.642574	0.691146	0.048572
ENCFF041CSB	NB4	ETS	kmer	0.665948	0.697922	0.031974
ENCFF925ZDU	NB4	ETS	kmer	0.652586	0.709122	0.056536
ENCFF230SPN	neural-progenitor-cell	KLF	kmer	0.718572	0.636486	-0.082086
ENCFF572AAL	neural-progenitor-cell	KLF	kmer	0.704642	0.610484	-0.094158
ENCFF105ETE	non-pigmented-ciliary-epithelial-cell	bZIP	kmer	0.650982	0.687708	0.036726
ENCFF105ETE	non-pigmented-ciliary-epithelial-cell	NR2E	kmer	0.605464	0.609758	0.004294
ENCFF699EKS	non-pigmented-ciliary-epithelial-cell	bZIP	kmer	0.663068	0.686426	0.023358
ENCFF699EKS	non-pigmented-ciliary-epithelial-cell	NR2E	kmer	0.60988	0.605532	-0.004348
ENCFF260PQV	OCI-LY7	ETS	kmer	0.632544	0.657722	0.025178
ENCFF696LIK	OCI-LY7	ETS	kmer	0.62574	0.650458	0.024718
ENCFF914GVC	omental-fat-pad	KLF	kmer	0.771986	0.6793	-0.092686
ENCFF914GVC	omental-fat-pad	zfC2H2_RHD	kmer	0.664384	0.666268	0.001884
ENCFF498QOJ	ovary	KLF	kmer	0.685018	0.620486	-0.064532
ENCFF367WMG	Panc1	bZIP	kmer	0.61992	0.670838	0.050918
ENCFF553OYG	Panc1	bZIP	kmer	0.639072	0.667562	0.02849
ENCFF040AJP	PC-9	bZIP	kmer	0.648702	0.635188	-0.013514
ENCFF364RGE	PC-9	bZIP	kmer	0.668008	0.6198	-0.048208
ENCFF364RGE	PC-9	NR2E	kmer	0.619438	0.610392	-0.009046
ENCFF055ZSF	Peyers-patch	KLF	kmer	0.805994	0.695946	-0.110048
ENCFF732XMH	Peyers-patch	KLF	kmer	0.753988	0.636268	-0.11772
ENCFF897JBO	pulmonary-artery-endothelial-cell	ETS	kmer	0.639992	0.768414	0.128422
ENCFF051UGM	renal-cortex-interstitium	KLF	kmer	0.672568	0.617048	-0.05552
ENCFF718CUQ	renal-cortex-interstitium	KLF	kmer	0.670594	0.60645	-0.064144
ENCFF583YED	renal-cortical-epithelial-cell	bZIP	kmer	0.67568	0.640658	-0.035022
ENCFF583YED	renal-cortical-epithelial-cell	NR2E	kmer	0.623896	0.618998	-0.004898
ENCFF659MOZ	renal-cortical-epithelial-cell	bZIP	kmer	0.694642	0.642	-0.052642
ENCFF386RDS	renal-pelvis	KLF	kmer	0.698958	0.642114	-0.056844
ENCFF407GRH	renal-pelvis	KLF	kmer	0.693624	0.630726	-0.062898
ENCFF015ULH	retina	E2F_zfC2H2	kmer	0.600356	0.642372	0.042016
ENCFF828VUZ	retina	E2F_zfC2H2	kmer	0.606288	0.623526	0.017238
ENCFF828VUZ	retina	KLF	kmer	0.662786	0.600636	-0.06215
ENCFF248RWN	retinal-pigment-epithelial-cell	bZIP	kmer	0.611938	0.61518	0.003242
ENCFF915CHV	retinal-pigment-epithelial-cell	bZIP	kmer	0.641088	0.608898	-0.03219
ENCFF915CHV	retinal-pigment-epithelial-cell	PITX	kmer	0.600802	0.702456	0.101654
ENCFF216UBC	right-kidney	KLF	kmer	0.694328	0.616788	-0.07754
ENCFF652KUN	right-renal-pelvis	KLF	kmer	0.6267	0.603402	-0.023298
ENCFF203SSC	skeletal-muscle-cell	bZIP	kmer	0.603712	0.632276	0.028564
ENCFF192DXB	SK-N-MC	ETS	kmer	0.61554	0.670662	0.055122
ENCFF888JLF	SK-N-MC	ETS	kmer	0.60081	0.665372	0.064562
ENCFF063OCF	small-intestine	KLF	kmer	0.72463	0.613466	-0.111164
ENCFF692AJW	small-intestine	KLF	kmer	0.704472	0.601928	-0.102544
ENCFF722CYJ	small-intestine	KLF	kmer	0.714254	0.60901	-0.105244
ENCFF587YNA	spleen	ETS	kmer	0.638298	0.717924	0.079626
ENCFF104PLB	stomach	KLF	kmer	0.665992	0.601734	-0.064258
ENCFF122TCQ	stomach	KLF	kmer	0.652664	0.629004	-0.02366
ENCFF229RBJ	stomach	KLF	kmer	0.761016	0.620854	-0.140162
ENCFF241TQC	stomach	KLF	kmer	0.659776	0.600194	-0.059582
ENCFF360CCE	stomach	KLF	kmer	0.662902	0.62284	-0.040062
ENCFF447UPF	stomach	KLF	kmer	0.687864	0.605252	-0.082612
ENCFF490TJL	stomach	KLF	kmer	0.664658	0.608564	-0.056094
ENCFF516KID	stomach	KLF	kmer	0.653924	0.606002	-0.047922
ENCFF543NNF	stomach	KLF	kmer	0.702638	0.631716	-0.070922
ENCFF637ZID	stomach	KLF	kmer	0.689874	0.608802	-0.081072
ENCFF738QCO	stomach	KLF	kmer	0.679984	0.62305	-0.056934
ENCFF877XCF	stomach	KLF	kmer	0.696386	0.63631	-0.060076
ENCFF933ABR	stomach	KLF	kmer	0.677372	0.648282	-0.02909
ENCFF254WCU	stromal-cell-of-bone-marrow	bZIP	kmer	0.619826	0.671884	0.052058
ENCFF547MHR	stromal-cell-of-bone-marrow	bZIP	kmer	0.62314	0.65614	0.033
ENCFF547MHR	stromal-cell-of-bone-marrow	NR2E	kmer	0.608612	0.630642	0.02203
ENCFF133ILP	T-cell	ETS	kmer	0.639292	0.672036	0.032744
ENCFF168YQF	T-cell	ETS	kmer	0.624254	0.69678	0.072526
ENCFF216NXR	T-cell	ETS	kmer	0.6259	0.663562	0.037662
ENCFF547UCK	T-cell	ETS	kmer	0.6221	0.679468	0.057368
ENCFF483RJF	T-helper-17-cell	ETS	kmer	0.652048	0.749828	0.09778
ENCFF012QDX	T-helper-1-cell	ETS	kmer	0.636488	0.740508	0.10402
ENCFF195KNE	T-helper-1-cell	ETS	kmer	0.603264	0.71682	0.113556
ENCFF654MRJ	T-helper-1-cell	ETS	kmer	0.608398	0.700318	0.09192
ENCFF481KKG	T-helper-2-cell	ETS	kmer	0.622496	0.698822	0.076326
ENCFF852NHM	T-helper-2-cell	ETS	kmer	0.606932	0.687512	0.08058
ENCFF061UBG	thymus	ETS	kmer	0.6233	0.64381	0.02051
ENCFF189LKP	thymus	ETS	kmer	0.629116	0.673434	0.044318
ENCFF601PAY	thymus	ETS	kmer	0.645714	0.660468	0.014754
ENCFF711IJR	thymus	ETS	kmer	0.614828	0.654422	0.039594
ENCFF880KWE	thymus	ETS	kmer	0.614798	0.656922	0.042124
ENCFF947RDC	thymus	ETS	kmer	0.60626	0.637818	0.031558
ENCFF959FMP	thymus	ETS	kmer	0.638494	0.674542	0.036048
ENCFF961JXL	thymus	ETS	kmer	0.627222	0.63118	0.003958
ENCFF984RKH	thymus	ETS	kmer	0.621274	0.636974	0.0157
ENCFF861DSY	tibial-artery	zfC2H2_RHD	kmer	0.64407	0.60523	-0.03884
ENCFF142WAA	transverse-colon	KLF	kmer	0.72514	0.657044	-0.068096
ENCFF161NFM	transverse-colon	KLF	kmer	0.79976	0.66465	-0.13511
ENCFF484TLE	transverse-colon	KLF	kmer	0.691772	0.601236	-0.090536
ENCFF562ESR	transverse-colon	KLF	kmer	0.717172	0.60565	-0.111522
ENCFF362PAJ	WERI-Rb-1	PITX	kmer	0.720518	0.81231	0.091792
ENCFF267YMX	WI38	bZIP	kmer	0.744936	0.720708	-0.024228
ENCFF267YMX	WI38	NR2E	kmer	0.670944	0.656062	-0.014882
ENCFF314TNS	WI38	bZIP	kmer	0.639836	0.690666	0.05083
ENCFF369ALL	WI38	bZIP	kmer	0.644552	0.676268	0.031716
ENCFF582GQG	WI38	bZIP	kmer	0.70892	0.737332	0.028412
ENCFF582GQG	WI38	NR2E	kmer	0.65853	0.679006	0.020476
ENCFF470VZX	A549	JUND_HS_SELEX_M0320_1	pwm	0.615686	0.676694	0.061008
ENCFF475BVB	A549	JUND_HS_SELEX_M0320_1	pwm	0.606288	0.662228	0.05594
ENCFF094AUJ	adrenal-gland	GATA6_MM_PBM_M0782_1	pwm	0.61587	0.623264	0.007394
ENCFF308QOO	AG04449	JUND_HS_SELEX_M0320_1	pwm	0.613544	0.664734	0.05119
ENCFF973CKA	AG04449	JUND_HS_SELEX_M0320_1	pwm	0.643742	0.665928	0.022186
ENCFF911OBG	AG04450	JUND_HS_SELEX_M0320_1	pwm	0.61392	0.663776	0.049856
ENCFF034CJK	AG09309	CEBPB_HS_SELEX_M5314_1	pwm	0.612974	0.658462	0.045488
ENCFF034CJK	AG09309	HLF_HS_SELEX_M5516_1	pwm	0.604204	0.650192	0.045988
ENCFF034CJK	AG09309	JUND_HS_SELEX_M0320_1	pwm	0.619574	0.671328	0.051754
ENCFF952FSO	AG09309	HLF_HS_SELEX_M5516_1	pwm	0.61706	0.628528	0.011468
ENCFF952FSO	AG09309	JUND_HS_SELEX_M0320_1	pwm	0.628202	0.651572	0.02337
ENCFF507FBF	AG09319	CEBPB_HS_SELEX_M5314_1	pwm	0.603586	0.624638	0.021052
ENCFF507FBF	AG09319	HLF_HS_SELEX_M5516_1	pwm	0.606566	0.623574	0.017008
ENCFF316LBU	amniotic-epithelial-cell	CEBPB_HS_SELEX_M5314_1	pwm	0.628226	0.665186	0.03696
ENCFF316LBU	amniotic-epithelial-cell	HLF_HS_SELEX_M5516_1	pwm	0.621054	0.647718	0.026664
ENCFF316LBU	amniotic-epithelial-cell	JUND_HS_SELEX_M0320_1	pwm	0.634902	0.647748	0.012846
ENCFF727SDN	amniotic-epithelial-cell	GATA6_MM_PBM_M0782_1	pwm	0.605688	0.63295	0.027262
ENCFF727SDN	amniotic-epithelial-cell	HLF_HS_SELEX_M5516_1	pwm	0.60368	0.643592	0.039912
ENCFF727SDN	amniotic-epithelial-cell	JUND_HS_SELEX_M0320_1	pwm	0.630804	0.656322	0.025518
ENCFF399UZY	astrocyte	JUND_HS_SELEX_M0320_1	pwm	0.696592	0.690156	-0.006436
ENCFF399UZY	astrocyte	RUNX3_HS_SELEX_M5792_1	pwm	0.619692	0.72023	0.100538
ENCFF399UZY	astrocyte	TEAD1_HS_SELEX_M5904_1	pwm	0.627458	0.664864	0.037406
ENCFF803JHO	astrocyte	JUND_HS_SELEX_M0320_1	pwm	0.659656	0.68553	0.025874
ENCFF057PEY	astrocyte-of-the-cerebellum	JUND_HS_SELEX_M0320_1	pwm	0.608574	0.629398	0.020824
ENCFF819ZIM	astrocyte-of-the-cerebellum	JUND_HS_SELEX_M0320_1	pwm	0.62315	0.636448	0.013298
ENCFF819ZIM	astrocyte-of-the-cerebellum	NFIX_HS_SELEX_M5665_1	pwm	0.629796	0.67599	0.046194
ENCFF662JPI	astrocyte-of-the-hippocampus	JUND_HS_SELEX_M0320_1	pwm	0.606454	0.624122	0.017668
ENCFF662JPI	astrocyte-of-the-hippocampus	NFIX_HS_SELEX_M5665_1	pwm	0.61615	0.681234	0.065084
ENCFF452BSD	astrocyte-of-the-spinal-cord	JUND_HS_SELEX_M0320_1	pwm	0.653706	0.682316	0.02861
ENCFF674LBB	astrocyte-of-the-spinal-cord	JUND_HS_SELEX_M0320_1	pwm	0.609106	0.71069	0.101584
ENCFF263YRO	B-cell	FLI1_HS_SELEX_M5431_1	pwm	0.607866	0.65819	0.050324
ENCFF581UTE	B-cell	KLF12_MM_SELEX_M6040_1	pwm	0.76464	0.61341	-0.15123
ENCFF147CSC	BE2C	GATA6_MM_PBM_M0782_1	pwm	0.613676	0.653596	0.03992
ENCFF147CSC	BE2C	LHX4_MM_SELEX_M6041_1	pwm	0.633856	0.64808	0.014224
ENCFF147CSC	BE2C	PHOX2B_HS_SELEX_M5715_1	pwm	0.603586	0.619724	0.016138
ENCFF147CSC	BE2C	VENTXpbm_HS_PBM_M0896_1	pwm	0.62559	0.648084	0.022494
ENCFF954RNY	BE2C	GATA6_MM_PBM_M0782_1	pwm	0.605718	0.661714	0.055996
ENCFF954RNY	BE2C	LHX4_MM_SELEX_M6041_1	pwm	0.64253	0.663712	0.021182
ENCFF954RNY	BE2C	VENTXpbm_HS_PBM_M0896_1	pwm	0.620242	0.66571	0.045468
ENCFF524XCQ	bipolar-neuron	VENTXpbm_HS_PBM_M0896_1	pwm	0.6185	0.601922	-0.016578
ENCFF950DMO	bipolar-neuron	LHX4_MM_SELEX_M6041_1	pwm	0.654742	0.624248	-0.030494
ENCFF950DMO	bipolar-neuron	VENTXpbm_HS_PBM_M0896_1	pwm	0.621144	0.61042	-0.010724
ENCFF169SUG	BJ	JUND_HS_SELEX_M0320_1	pwm	0.627052	0.658558	0.031506
ENCFF824OPX	BJ	JUND_HS_SELEX_M0320_1	pwm	0.65371	0.710732	0.057022
ENCFF207IYJ	brain	LHX4_MM_SELEX_M6041_1	pwm	0.683236	0.605852	-0.077384
ENCFF218ZFS	brain	LHX4_MM_SELEX_M6041_1	pwm	0.682862	0.606184	-0.076678
ENCFF303THQ	brain	LHX4_MM_SELEX_M6041_1	pwm	0.695806	0.618538	-0.077268
ENCFF303THQ	brain	VENTXpbm_HS_PBM_M0896_1	pwm	0.658154	0.611744	-0.04641
ENCFF322ZNH	brain	LHX4_MM_SELEX_M6041_1	pwm	0.641514	0.610542	-0.030972
ENCFF322ZNH	brain	VENTXpbm_HS_PBM_M0896_1	pwm	0.62299	0.605962	-0.017028
ENCFF457XYZ	brain	LHX4_MM_SELEX_M6041_1	pwm	0.69178	0.621848	-0.069932
ENCFF457XYZ	brain	VENTXpbm_HS_PBM_M0896_1	pwm	0.641516	0.610088	-0.031428
ENCFF560YBU	brain	NFIX_HS_SELEX_M5665_1	pwm	0.60384	0.776046	0.172206
ENCFF224NMM	brain-microvascular-endothelial-cell	HLF_HS_SELEX_M5516_1	pwm	0.620924	0.624972	0.004048
ENCFF224NMM	brain-microvascular-endothelial-cell	JUND_HS_SELEX_M0320_1	pwm	0.711272	0.75904	0.047768
ENCFF833HUK	brain-microvascular-endothelial-cell	JUND_HS_SELEX_M0320_1	pwm	0.717056	0.760506	0.04345
ENCFF336OGZ	breast-epithelium	KLF12_MM_SELEX_M6040_1	pwm	0.704312	0.608124	-0.096188
ENCFF336OGZ	breast-epithelium	NFIX_HS_SELEX_M5665_1	pwm	0.621392	0.696312	0.07492
ENCFF338GII	bronchial-epithelial-cell	CEBPB_HS_SELEX_M5314_1	pwm	0.654484	0.623982	-0.030502
ENCFF338GII	bronchial-epithelial-cell	HLF_HS_SELEX_M5516_1	pwm	0.631756	0.605844	-0.025912
ENCFF338GII	bronchial-epithelial-cell	JUND_HS_SELEX_M0320_1	pwm	0.729666	0.747952	0.018286
ENCFF546QUZ	bronchial-epithelial-cell	CEBPB_HS_SELEX_M5314_1	pwm	0.618442	0.62141	0.002968
ENCFF546QUZ	bronchial-epithelial-cell	HLF_HS_SELEX_M5516_1	pwm	0.61374	0.616432	0.002692
ENCFF546QUZ	bronchial-epithelial-cell	JUND_HS_SELEX_M0320_1	pwm	0.769036	0.74744	-0.021596
ENCFF546QUZ	bronchial-epithelial-cell	P53_HS_SELEX_M6105_1	pwm	0.64504	0.726064	0.081024
ENCFF552CWN	bronchial-epithelial-cell	JUND_HS_SELEX_M0320_1	pwm	0.603038	0.70904	0.106002
ENCFF541GPX	Caco-2	KLF12_MM_SELEX_M6040_1	pwm	0.730972	0.667502	-0.06347
ENCFF929UQL	Caco-2	KLF12_MM_SELEX_M6040_1	pwm	0.73494	0.654812	-0.080128
ENCFF528ZJQ	cardiac-fibroblast	CEBPB_HS_SELEX_M5314_1	pwm	0.617938	0.654524	0.036586
ENCFF528ZJQ	cardiac-fibroblast	HLF_HS_SELEX_M5516_1	pwm	0.60569	0.637728	0.032038
ENCFF528ZJQ	cardiac-fibroblast	JUND_HS_SELEX_M0320_1	pwm	0.647002	0.736536	0.089534
ENCFF653KYK	cardiac-fibroblast	CEBPB_HS_SELEX_M5314_1	pwm	0.657026	0.671952	0.014926
ENCFF653KYK	cardiac-fibroblast	HLF_HS_SELEX_M5516_1	pwm	0.638696	0.653972	0.015276
ENCFF653KYK	cardiac-fibroblast	JUND_HS_SELEX_M0320_1	pwm	0.76982	0.752252	-0.017568
ENCFF156RTG	cardiac-muscle-cell	JUND_HS_SELEX_M0320_1	pwm	0.605202	0.618232	0.01303
ENCFF862ZMZ	cardiac-muscle-cell	JUND_HS_SELEX_M0320_1	pwm	0.601248	0.63266	0.031412
ENCFF063IUG	CD14-positive-monocyte	CEBPB_HS_SELEX_M5314_1	pwm	0.646864	0.677328	0.030464
ENCFF063IUG	CD14-positive-monocyte	FLI1_HS_SELEX_M5431_1	pwm	0.626094	0.696662	0.070568
ENCFF063IUG	CD14-positive-monocyte	HLF_HS_SELEX_M5516_1	pwm	0.65408	0.676184	0.022104
ENCFF063IUG	CD14-positive-monocyte	JUND_HS_SELEX_M0320_1	pwm	0.688688	0.722248	0.03356
ENCFF063IUG	CD14-positive-monocyte	MEIS2_MM_PBM_M0965_1	pwm	0.617738	0.601014	-0.016724
ENCFF289XSM	CD14-positive-monocyte	CEBPB_HS_SELEX_M5314_1	pwm	0.637264	0.6712	0.033936
ENCFF289XSM	CD14-positive-monocyte	HLF_HS_SELEX_M5516_1	pwm	0.638764	0.664788	0.026024
ENCFF289XSM	CD14-positive-monocyte	JUND_HS_SELEX_M0320_1	pwm	0.618596	0.668464	0.049868
ENCFF424GPY	CD14-positive-monocyte	CEBPB_HS_SELEX_M5314_1	pwm	0.637856	0.687196	0.04934
ENCFF424GPY	CD14-positive-monocyte	ELF1_HS_SELEX_M5373_1	pwm	0.618396	0.66496	0.046564
ENCFF424GPY	CD14-positive-monocyte	FLI1_HS_SELEX_M5431_1	pwm	0.66288	0.723658	0.060778
ENCFF424GPY	CD14-positive-monocyte	HLF_HS_SELEX_M5516_1	pwm	0.624762	0.671964	0.047202
ENCFF424GPY	CD14-positive-monocyte	JUND_HS_SELEX_M0320_1	pwm	0.731744	0.71967	-0.012074
ENCFF424GPY	CD14-positive-monocyte	MEIS2_MM_PBM_M0965_1	pwm	0.60724	0.609484	0.002244
ENCFF815GDP	CD14-positive-monocyte	CEBPB_HS_SELEX_M5314_1	pwm	0.67806	0.73127	0.05321
ENCFF815GDP	CD14-positive-monocyte	ELF1_HS_SELEX_M5373_1	pwm	0.636796	0.65333	0.016534
ENCFF815GDP	CD14-positive-monocyte	FLI1_HS_SELEX_M5431_1	pwm	0.66476	0.702352	0.037592
ENCFF815GDP	CD14-positive-monocyte	HLF_HS_SELEX_M5516_1	pwm	0.674064	0.71048	0.036416
ENCFF815GDP	CD14-positive-monocyte	JUND_HS_SELEX_M0320_1	pwm	0.723602	0.715578	-0.008024
ENCFF815GDP	CD14-positive-monocyte	MEIS2_MM_PBM_M0965_1	pwm	0.627608	0.61373	-0.013878
ENCFF815GDP	CD14-positive-monocyte	SFPI1_HS_SELEX_M5863_1	pwm	0.602592	0.66824	0.065648
ENCFF096NVD	CD1c-positive-myeloid-dendritic-cell	FLI1_HS_SELEX_M5431_1	pwm	0.608796	0.65335	0.044554
ENCFF096NVD	CD1c-positive-myeloid-dendritic-cell	KLF12_MM_SELEX_M6040_1	pwm	0.699178	0.600104	-0.099074
ENCFF267VKD	CD1c-positive-myeloid-dendritic-cell	CEBPB_HS_SELEX_M5314_1	pwm	0.603176	0.650208	0.047032
ENCFF267VKD	CD1c-positive-myeloid-dendritic-cell	HLF_HS_SELEX_M5516_1	pwm	0.613286	0.62739	0.014104
ENCFF109RSW	CD4-positive_-alpha-beta-T-cell	FLI1_HS_SELEX_M5431_1	pwm	0.61399	0.709112	0.095122
ENCFF338UFC	CD4-positive_-alpha-beta-T-cell	FLI1_HS_SELEX_M5431_1	pwm	0.61391	0.68029	0.06638
ENCFF703UHS	CD4-positive_-alpha-beta-T-cell	KLF12_MM_SELEX_M6040_1	pwm	0.7482	0.61656	-0.13164
ENCFF109VIJ	CD8-positive_-alpha-beta-T-cell	ELF1_HS_SELEX_M5373_1	pwm	0.60463	0.666126	0.061496
ENCFF109VIJ	CD8-positive_-alpha-beta-T-cell	FLI1_HS_SELEX_M5431_1	pwm	0.60065	0.714446	0.113796
ENCFF512IML	CD8-positive_-alpha-beta-T-cell	KLF12_MM_SELEX_M6040_1	pwm	0.748528	0.603348	-0.14518
ENCFF566SXQ	CD8-positive_-alpha-beta-T-cell	FLI1_HS_SELEX_M5431_1	pwm	0.603052	0.698464	0.095412
ENCFF437IAA	CMK	FLI1_HS_SELEX_M5431_1	pwm	0.606786	0.711026	0.10424
ENCFF437IAA	CMK	GATA6_MM_PBM_M0782_1	pwm	0.609858	0.76016	0.150302
ENCFF024DAR	common-myeloid-progenitor_-CD34-positive	GATA6_MM_PBM_M0782_1	pwm	0.606664	0.653064	0.0464
ENCFF059VUS	common-myeloid-progenitor_-CD34-positive	FLI1_HS_SELEX_M5431_1	pwm	0.618284	0.794054	0.17577
ENCFF059VUS	common-myeloid-progenitor_-CD34-positive	GATA6_MM_PBM_M0782_1	pwm	0.610108	0.662344	0.052236
ENCFF110CYC	common-myeloid-progenitor_-CD34-positive	FLI1_HS_SELEX_M5431_1	pwm	0.640896	0.802918	0.162022
ENCFF171LSI	common-myeloid-progenitor_-CD34-positive	GATA6_MM_PBM_M0782_1	pwm	0.607688	0.642686	0.034998
ENCFF365IGK	common-myeloid-progenitor_-CD34-positive	ELF1_HS_SELEX_M5373_1	pwm	0.63208	0.722916	0.090836
ENCFF365IGK	common-myeloid-progenitor_-CD34-positive	FLI1_HS_SELEX_M5431_1	pwm	0.667456	0.794102	0.126646
ENCFF365IGK	common-myeloid-progenitor_-CD34-positive	GATA6_MM_PBM_M0782_1	pwm	0.608824	0.659436	0.050612
ENCFF450BGX	common-myeloid-progenitor_-CD34-positive	ELF1_HS_SELEX_M5373_1	pwm	0.61473	0.71068	0.09595
ENCFF450BGX	common-myeloid-progenitor_-CD34-positive	FLI1_HS_SELEX_M5431_1	pwm	0.650608	0.79804	0.147432
ENCFF450BGX	common-myeloid-progenitor_-CD34-positive	JUND_HS_SELEX_M0320_1	pwm	0.617504	0.611228	-0.006276
ENCFF725QIG	common-myeloid-progenitor_-CD34-positive	GATA6_MM_PBM_M0782_1	pwm	0.641892	0.663492	0.0216
ENCFF743UIM	common-myeloid-progenitor_-CD34-positive	FLI1_HS_SELEX_M5431_1	pwm	0.602972	0.78601	0.183038
ENCFF743UIM	common-myeloid-progenitor_-CD34-positive	GATA6_MM_PBM_M0782_1	pwm	0.614252	0.665948	0.051696
ENCFF854EJY	common-myeloid-progenitor_-CD34-positive	FLI1_HS_SELEX_M5431_1	pwm	0.631772	0.791772	0.16
ENCFF854EJY	common-myeloid-progenitor_-CD34-positive	GATA6_MM_PBM_M0782_1	pwm	0.609174	0.606206	-0.002968
ENCFF856BCY	common-myeloid-progenitor_-CD34-positive	ELF1_HS_SELEX_M5373_1	pwm	0.623652	0.74436	0.120708
ENCFF856BCY	common-myeloid-progenitor_-CD34-positive	FLI1_HS_SELEX_M5431_1	pwm	0.65865	0.819192	0.160542
ENCFF856BCY	common-myeloid-progenitor_-CD34-positive	GATA6_MM_PBM_M0782_1	pwm	0.607274	0.602342	-0.004932
ENCFF929VDK	common-myeloid-progenitor_-CD34-positive	ELF1_HS_SELEX_M5373_1	pwm	0.629536	0.729048	0.099512
ENCFF929VDK	common-myeloid-progenitor_-CD34-positive	FLI1_HS_SELEX_M5431_1	pwm	0.657274	0.798696	0.141422
ENCFF221FND	Daoy	JUND_HS_SELEX_M0320_1	pwm	0.605564	0.735786	0.130222
ENCFF948FCS	Daoy	JUND_HS_SELEX_M0320_1	pwm	0.627782	0.766944	0.139162
ENCFF045UNP	dermis-blood-vessel-endothelial-cell	JUND_HS_SELEX_M0320_1	pwm	0.62658	0.65845	0.03187
ENCFF419NYS	dermis-blood-vessel-endothelial-cell	FLI1_HS_SELEX_M5431_1	pwm	0.645122	0.824756	0.179634
ENCFF419NYS	dermis-blood-vessel-endothelial-cell	JUND_HS_SELEX_M0320_1	pwm	0.621538	0.63779	0.016252
ENCFF614FYH	dermis-blood-vessel-endothelial-cell	JUND_HS_SELEX_M0320_1	pwm	0.604632	0.630996	0.026364
ENCFF780DOD	dermis-blood-vessel-endothelial-cell	ELF1_HS_SELEX_M5373_1	pwm	0.64332	0.71553	0.07221
ENCFF780DOD	dermis-blood-vessel-endothelial-cell	FLI1_HS_SELEX_M5431_1	pwm	0.702288	0.824282	0.121994
ENCFF780DOD	dermis-blood-vessel-endothelial-cell	JUND_HS_SELEX_M0320_1	pwm	0.68248	0.649736	-0.032744
ENCFF366UHV	dermis-microvascular-lymphatic-vessel-endothelial-cell	JUND_HS_SELEX_M0320_1	pwm	0.603332	0.626048	0.022716
ENCFF734QSB	dermis-microvascular-lymphatic-vessel-endothelial-cell	FLI1_HS_SELEX_M5431_1	pwm	0.622814	0.805046	0.182232
ENCFF734QSB	dermis-microvascular-lymphatic-vessel-endothelial-cell	NFIX_HS_SELEX_M5665_1	pwm	0.60931	0.621556	0.012246
ENCFF878LVP	dermis-microvascular-lymphatic-vessel-endothelial-cell	FLI1_HS_SELEX_M5431_1	pwm	0.619126	0.805324	0.186198
ENCFF878LVP	dermis-microvascular-lymphatic-vessel-endothelial-cell	NFIX_HS_SELEX_M5665_1	pwm	0.613756	0.61952	0.005764
ENCFF153SDP	EL	JUND_HS_SELEX_M0320_1	pwm	0.6439	0.724614	0.080714
ENCFF513DVK	EL	JUND_HS_SELEX_M0320_1	pwm	0.642682	0.704482	0.0618
ENCFF304NJX	ELR	JUND_HS_SELEX_M0320_1	pwm	0.760096	0.820036	0.05994
ENCFF899ISV	ELR	JUND_HS_SELEX_M0320_1	pwm	0.693586	0.801118	0.107532
ENCFF073TCP	endodermal-cell	KLF12_MM_SELEX_M6040_1	pwm	0.760208	0.689288	-0.07092
ENCFF222SCR	endodermal-cell	KLF12_MM_SELEX_M6040_1	pwm	0.776178	0.721924	-0.054254
ENCFF222SCR	endodermal-cell	ZNF202_MM_PBM_M0404_1	pwm	0.62851	0.653904	0.025394
ENCFF097KBE	endothelial-cell-of-umbilical-vein	GATA6_MM_PBM_M0782_1	pwm	0.608672	0.61219	0.003518
ENCFF330HEK	endothelial-cell-of-umbilical-vein	ELF1_HS_SELEX_M5373_1	pwm	0.629342	0.696498	0.067156
ENCFF330HEK	endothelial-cell-of-umbilical-vein	FLI1_HS_SELEX_M5431_1	pwm	0.683712	0.789264	0.105552
ENCFF330HEK	endothelial-cell-of-umbilical-vein	JUND_HS_SELEX_M0320_1	pwm	0.674964	0.680546	0.005582
ENCFF184TWB	epithelial-cell-of-esophagus	CEBPB_HS_SELEX_M5314_1	pwm	0.619726	0.614122	-0.005604
ENCFF184TWB	epithelial-cell-of-esophagus	JUND_HS_SELEX_M0320_1	pwm	0.652568	0.689916	0.037348
ENCFF184TWB	epithelial-cell-of-esophagus	P53_HS_SELEX_M6105_1	pwm	0.62848	0.737648	0.109168
ENCFF527EJQ	epithelial-cell-of-esophagus	JUND_HS_SELEX_M0320_1	pwm	0.640382	0.716678	0.076296
ENCFF238YWY	epithelial-cell-of-prostate	JUND_HS_SELEX_M0320_1	pwm	0.65644	0.686546	0.030106
ENCFF608WCU	epithelial-cell-of-prostate	JUND_HS_SELEX_M0320_1	pwm	0.674318	0.712002	0.037684
ENCFF218MZJ	epithelial-cell-of-proximal-tubule	CEBPB_HS_SELEX_M5314_1	pwm	0.609138	0.602796	-0.006342
ENCFF218MZJ	epithelial-cell-of-proximal-tubule	JUND_HS_SELEX_M0320_1	pwm	0.688082	0.694124	0.006042
ENCFF218MZJ	epithelial-cell-of-proximal-tubule	VENTXpbm_HS_PBM_M0896_1	pwm	0.608732	0.618324	0.009592
ENCFF231GLQ	epithelial-cell-of-proximal-tubule	JUND_HS_SELEX_M0320_1	pwm	0.740328	0.702214	-0.038114
ENCFF231GLQ	epithelial-cell-of-proximal-tubule	VENTXpbm_HS_PBM_M0896_1	pwm	0.607862	0.61653	0.008668
ENCFF720MLF	eye	LHX4_MM_SELEX_M6041_1	pwm	0.65156	0.626826	-0.024734
ENCFF720MLF	eye	VENTXpbm_HS_PBM_M0896_1	pwm	0.648948	0.624414	-0.024534
ENCFF984RUT	eye	LHX4_MM_SELEX_M6041_1	pwm	0.667716	0.670932	0.003216
ENCFF984RUT	eye	PHOX2B_HS_SELEX_M5715_1	pwm	0.610894	0.605402	-0.005492
ENCFF984RUT	eye	VENTXpbm_HS_PBM_M0896_1	pwm	0.634842	0.66679	0.031948
ENCFF178BEG	fibroblast-of-dermis	HLF_HS_SELEX_M5516_1	pwm	0.609324	0.61402	0.004696
ENCFF178BEG	fibroblast-of-dermis	JUND_HS_SELEX_M0320_1	pwm	0.676634	0.695998	0.019364
ENCFF178BEG	fibroblast-of-dermis	NFIX_HS_SELEX_M5665_1	pwm	0.62081	0.640582	0.019772
ENCFF445GCV	fibroblast-of-dermis	CEBPB_HS_SELEX_M5314_1	pwm	0.60277	0.600796	-0.001974
ENCFF445GCV	fibroblast-of-dermis	HLF_HS_SELEX_M5516_1	pwm	0.612468	0.605954	-0.006514
ENCFF445GCV	fibroblast-of-dermis	JUND_HS_SELEX_M0320_1	pwm	0.691446	0.657548	-0.033898
ENCFF445GCV	fibroblast-of-dermis	NFIX_HS_SELEX_M5665_1	pwm	0.619952	0.646914	0.026962
ENCFF063MTX	fibroblast-of-gingiva	HLF_HS_SELEX_M5516_1	pwm	0.60396	0.65278	0.04882
ENCFF063MTX	fibroblast-of-gingiva	JUND_HS_SELEX_M0320_1	pwm	0.617746	0.6147	-0.003046
ENCFF331SYD	fibroblast-of-lung	JUND_HS_SELEX_M0320_1	pwm	0.688828	0.701576	0.012748
ENCFF331SYD	fibroblast-of-lung	RUNX3_HS_SELEX_M5792_1	pwm	0.617948	0.714054	0.096106
ENCFF334RSR	fibroblast-of-lung	CEBPB_HS_SELEX_M5314_1	pwm	0.613342	0.642952	0.02961
ENCFF334RSR	fibroblast-of-lung	JUND_HS_SELEX_M0320_1	pwm	0.603748	0.642816	0.039068
ENCFF644XOI	fibroblast-of-lung	JUND_HS_SELEX_M0320_1	pwm	0.65128	0.691792	0.040512
ENCFF644XOI	fibroblast-of-lung	NFIX_HS_SELEX_M5665_1	pwm	0.60433	0.61961	0.01528
ENCFF681UOZ	fibroblast-of-lung	JUND_HS_SELEX_M0320_1	pwm	0.69788	0.72076	0.02288
ENCFF681UOZ	fibroblast-of-lung	RUNX3_HS_SELEX_M5792_1	pwm	0.613836	0.705804	0.091968
ENCFF042ALK	fibroblast-of-mammary-gland	CEBPB_HS_SELEX_M5314_1	pwm	0.608652	0.617234	0.008582
ENCFF042ALK	fibroblast-of-mammary-gland	HLF_HS_SELEX_M5516_1	pwm	0.608152	0.616712	0.00856
ENCFF042ALK	fibroblast-of-mammary-gland	JUND_HS_SELEX_M0320_1	pwm	0.700886	0.74994	0.049054
ENCFF387KMX	fibroblast-of-mammary-gland	CEBPB_HS_SELEX_M5314_1	pwm	0.61361	0.60175	-0.01186
ENCFF387KMX	fibroblast-of-mammary-gland	HLF_HS_SELEX_M5516_1	pwm	0.608206	0.611036	0.00283
ENCFF387KMX	fibroblast-of-mammary-gland	JUND_HS_SELEX_M0320_1	pwm	0.66557	0.746622	0.081052
ENCFF089IWT	fibroblast-of-peridontal-ligament	CEBPB_HS_SELEX_M5314_1	pwm	0.627698	0.654952	0.027254
ENCFF089IWT	fibroblast-of-peridontal-ligament	HLF_HS_SELEX_M5516_1	pwm	0.605494	0.63175	0.026256
ENCFF089IWT	fibroblast-of-peridontal-ligament	JUND_HS_SELEX_M0320_1	pwm	0.62214	0.650048	0.027908
ENCFF089IWT	fibroblast-of-peridontal-ligament	NFIX_HS_SELEX_M5665_1	pwm	0.617242	0.646438	0.029196
ENCFF620HKT	fibroblast-of-peridontal-ligament	CEBPB_HS_SELEX_M5314_1	pwm	0.618424	0.662442	0.044018
ENCFF620HKT	fibroblast-of-peridontal-ligament	JUND_HS_SELEX_M0320_1	pwm	0.646922	0.66217	0.015248
ENCFF620HKT	fibroblast-of-peridontal-ligament	NFIX_HS_SELEX_M5665_1	pwm	0.601324	0.664718	0.063394
ENCFF385ZNB	fibroblast-of-pulmonary-artery	CEBPB_HS_SELEX_M5314_1	pwm	0.63541	0.679926	0.044516
ENCFF385ZNB	fibroblast-of-pulmonary-artery	HLF_HS_SELEX_M5516_1	pwm	0.626272	0.661488	0.035216
ENCFF417VBX	fibroblast-of-pulmonary-artery	CEBPB_HS_SELEX_M5314_1	pwm	0.615018	0.650958	0.03594
ENCFF417VBX	fibroblast-of-pulmonary-artery	HLF_HS_SELEX_M5516_1	pwm	0.611232	0.659474	0.048242
ENCFF417VBX	fibroblast-of-pulmonary-artery	JUND_HS_SELEX_M0320_1	pwm	0.60295	0.678302	0.075352
ENCFF045KGY	fibroblast-of-skin-of-abdomen	JUND_HS_SELEX_M0320_1	pwm	0.62126	0.667926	0.046666
ENCFF336MQK	fibroblast-of-skin-of-left-biceps	JUND_HS_SELEX_M0320_1	pwm	0.618044	0.6219	0.003856
ENCFF382NHI	fibroblast-of-skin-of-right-biceps	JUND_HS_SELEX_M0320_1	pwm	0.622734	0.692216	0.069482
ENCFF191HPU	fibroblast-of-skin-of-right-quadriceps	JUND_HS_SELEX_M0320_1	pwm	0.632396	0.67129	0.038894
ENCFF594OFO	fibroblast-of-skin-of-scalp	JUND_HS_SELEX_M0320_1	pwm	0.602108	0.612944	0.010836
ENCFF073TWU	fibroblast-of-skin-of-upper-back	JUND_HS_SELEX_M0320_1	pwm	0.625442	0.643086	0.017644
ENCFF469AJE	fibroblast-of-skin-of-upper-back	JUND_HS_SELEX_M0320_1	pwm	0.654968	0.665708	0.01074
ENCFF904WZA	fibroblast-of-the-aortic-adventitia	CEBPB_HS_SELEX_M5314_1	pwm	0.622754	0.624098	0.001344
ENCFF904WZA	fibroblast-of-the-aortic-adventitia	HLF_HS_SELEX_M5516_1	pwm	0.61306	0.61578	0.00272
ENCFF904WZA	fibroblast-of-the-aortic-adventitia	JUND_HS_SELEX_M0320_1	pwm	0.624816	0.655652	0.030836
ENCFF904WZA	fibroblast-of-the-aortic-adventitia	NFIX_HS_SELEX_M5665_1	pwm	0.626898	0.714988	0.08809
ENCFF990HMA	fibroblast-of-the-aortic-adventitia	CEBPB_HS_SELEX_M5314_1	pwm	0.62026	0.61969	-0.00057
ENCFF990HMA	fibroblast-of-the-aortic-adventitia	JUND_HS_SELEX_M0320_1	pwm	0.619036	0.650412	0.031376
ENCFF990HMA	fibroblast-of-the-aortic-adventitia	NFIX_HS_SELEX_M5665_1	pwm	0.608266	0.68373	0.075464
ENCFF272AFT	fibroblast-of-the-conjunctiva	CEBPB_HS_SELEX_M5314_1	pwm	0.603254	0.623356	0.020102
ENCFF764ODA	fibroblast-of-the-conjunctiva	JUND_HS_SELEX_M0320_1	pwm	0.602934	0.632346	0.029412
ENCFF311UAO	fibroblast-of-villous-mesenchyme	CEBPB_HS_SELEX_M5314_1	pwm	0.616724	0.676802	0.060078
ENCFF311UAO	fibroblast-of-villous-mesenchyme	HLF_HS_SELEX_M5516_1	pwm	0.601664	0.683112	0.081448
ENCFF311UAO	fibroblast-of-villous-mesenchyme	JUND_HS_SELEX_M0320_1	pwm	0.615238	0.636684	0.021446
ENCFF032LRL	foreskin-fibroblast	JUND_HS_SELEX_M0320_1	pwm	0.666968	0.669228	0.00226
ENCFF329APP	foreskin-fibroblast	CEBPB_HS_SELEX_M5314_1	pwm	0.600394	0.60901	0.008616
ENCFF329APP	foreskin-fibroblast	HLF_HS_SELEX_M5516_1	pwm	0.609944	0.627736	0.017792
ENCFF329APP	foreskin-fibroblast	NFIX_HS_SELEX_M5665_1	pwm	0.614404	0.664806	0.050402
ENCFF811FJV	foreskin-fibroblast	JUND_HS_SELEX_M0320_1	pwm	0.621488	0.692568	0.07108
ENCFF637CAJ	foreskin-keratinocyte	JUND_HS_SELEX_M0320_1	pwm	0.69404	0.718508	0.024468
ENCFF637CAJ	foreskin-keratinocyte	TEAD1_HS_SELEX_M5904_1	pwm	0.617782	0.619304	0.001522
ENCFF719FAT	foreskin-keratinocyte	JUND_HS_SELEX_M0320_1	pwm	0.6543	0.669922	0.015622
ENCFF331ODX	foreskin-melanocyte	JUND_HS_SELEX_M0320_1	pwm	0.609512	0.61778	0.008268
ENCFF838FGZ	foreskin-melanocyte	JUND_HS_SELEX_M0320_1	pwm	0.62791	0.617572	-0.010338
ENCFF927KUT	glomerular-endothelial-cell	ELF1_HS_SELEX_M5373_1	pwm	0.608588	0.723662	0.115074
ENCFF927KUT	glomerular-endothelial-cell	FLI1_HS_SELEX_M5431_1	pwm	0.655144	0.81647	0.161326
ENCFF927KUT	glomerular-endothelial-cell	JUND_HS_SELEX_M0320_1	pwm	0.670004	0.637252	-0.032752
ENCFF993TCA	glomerular-endothelial-cell	ELF1_HS_SELEX_M5373_1	pwm	0.636092	0.735146	0.099054
ENCFF993TCA	glomerular-endothelial-cell	FLI1_HS_SELEX_M5431_1	pwm	0.694982	0.830758	0.135776
ENCFF993TCA	glomerular-endothelial-cell	JUND_HS_SELEX_M0320_1	pwm	0.712362	0.694778	-0.017584
ENCFF452WOT	GM04503	JUND_HS_SELEX_M0320_1	pwm	0.660414	0.6674	0.006986
ENCFF452WOT	GM04503	TEAD1_HS_SELEX_M5904_1	pwm	0.60309	0.67396	0.07087
ENCFF553BZD	GM04503	JUND_HS_SELEX_M0320_1	pwm	0.67131	0.66873	-0.00258
ENCFF553BZD	GM04503	TEAD1_HS_SELEX_M5904_1	pwm	0.60312	0.651514	0.048394
ENCFF486BHM	GM04504	JUND_HS_SELEX_M0320_1	pwm	0.683934	0.714398	0.030464
ENCFF097IKA	GM12864	FLI1_HS_SELEX_M5431_1	pwm	0.600714	0.635944	0.03523
ENCFF273MVV	GM12878	FLI1_HS_SELEX_M5431_1	pwm	0.600582	0.62389	0.023308
ENCFF665HCW	GM23248	JUND_HS_SELEX_M0320_1	pwm	0.654796	0.764858	0.110062
ENCFF959RZS	GM23248	JUND_HS_SELEX_M0320_1	pwm	0.621552	0.744786	0.123234
ENCFF810HAS	GM23338	KLF12_MM_SELEX_M6040_1	pwm	0.690114	0.633458	-0.056656
ENCFF520HRA	H7	VENTXpbm_HS_PBM_M0896_1	pwm	0.623788	0.621538	-0.00225
ENCFF870MCD	H7	LHX4_MM_SELEX_M6041_1	pwm	0.656708	0.61064	-0.046068
ENCFF870MCD	H7	VENTXpbm_HS_PBM_M0896_1	pwm	0.633804	0.619868	-0.013936
ENCFF175RBN	HCT116	JUND_HS_SELEX_M0320_1	pwm	0.611122	0.743958	0.132836
ENCFF228YKV	HCT116	JUND_HS_SELEX_M0320_1	pwm	0.6039	0.756624	0.152724
ENCFF053SED	heart	GATA6_MM_PBM_M0782_1	pwm	0.624252	0.655326	0.031074
ENCFF086KUU	heart	GATA6_MM_PBM_M0782_1	pwm	0.602032	0.625658	0.023626
ENCFF327HDP	heart	NFIX_HS_SELEX_M5665_1	pwm	0.623276	0.73317	0.109894
ENCFF358VDV	heart	GATA6_MM_PBM_M0782_1	pwm	0.60161	0.638808	0.037198
ENCFF797TTK	heart	GATA6_MM_PBM_M0782_1	pwm	0.601034	0.657016	0.055982
ENCFF805BEX	heart	GATA6_MM_PBM_M0782_1	pwm	0.629968	0.608912	-0.021056
ENCFF871GML	heart	GATA6_MM_PBM_M0782_1	pwm	0.628612	0.634858	0.006246
ENCFF520HKD	heart-left-ventricle	GATA6_MM_PBM_M0782_1	pwm	0.603996	0.63067	0.026674
ENCFF939RCS	heart-left-ventricle	KLF12_MM_SELEX_M6040_1	pwm	0.7142	0.608336	-0.105864
ENCFF250FRA	heart-right-ventricle	GATA6_MM_PBM_M0782_1	pwm	0.614218	0.640576	0.026358
ENCFF687FIQ	heart-right-ventricle	GATA6_MM_PBM_M0782_1	pwm	0.629114	0.659126	0.030012
ENCFF006OZN	HeLa-S3	CEBPB_HS_SELEX_M5314_1	pwm	0.609192	0.61607	0.006878
ENCFF006OZN	HeLa-S3	HLF_HS_SELEX_M5516_1	pwm	0.606008	0.64224	0.036232
ENCFF006OZN	HeLa-S3	JUND_HS_SELEX_M0320_1	pwm	0.739082	0.75203	0.012948
ENCFF526VFR	HeLa-S3	CEBPB_HS_SELEX_M5314_1	pwm	0.638338	0.658216	0.019878
ENCFF526VFR	HeLa-S3	HLF_HS_SELEX_M5516_1	pwm	0.633952	0.66706	0.033108
ENCFF526VFR	HeLa-S3	JUND_HS_SELEX_M0320_1	pwm	0.706832	0.719324	0.012492
ENCFF241GBQ	hematopoietic-multipotent-progenitor-cell	FLI1_HS_SELEX_M5431_1	pwm	0.607648	0.77578	0.168132
ENCFF241GBQ	hematopoietic-multipotent-progenitor-cell	GATA6_MM_PBM_M0782_1	pwm	0.601696	0.643256	0.04156
ENCFF495SEM	hematopoietic-multipotent-progenitor-cell	CEBPB_HS_SELEX_M5314_1	pwm	0.60438	0.614304	0.009924
ENCFF495SEM	hematopoietic-multipotent-progenitor-cell	GATA6_MM_PBM_M0782_1	pwm	0.619024	0.628164	0.00914
ENCFF495SEM	hematopoietic-multipotent-progenitor-cell	KLF12_MM_SELEX_M6040_1	pwm	0.66805	0.605044	-0.063006
ENCFF570PDT	hematopoietic-multipotent-progenitor-cell	GATA6_MM_PBM_M0782_1	pwm	0.617432	0.601724	-0.015708
ENCFF721SJU	hematopoietic-multipotent-progenitor-cell	GATA6_MM_PBM_M0782_1	pwm	0.626366	0.865648	0.239282
ENCFF721SJU	hematopoietic-multipotent-progenitor-cell	KLF12_MM_SELEX_M6040_1	pwm	0.695336	0.621672	-0.073664
ENCFF733JSK	hematopoietic-multipotent-progenitor-cell	GATA6_MM_PBM_M0782_1	pwm	0.630596	0.880788	0.250192
ENCFF733JSK	hematopoietic-multipotent-progenitor-cell	KLF12_MM_SELEX_M6040_1	pwm	0.689424	0.610152	-0.079272
ENCFF822FIY	hematopoietic-multipotent-progenitor-cell	GATA6_MM_PBM_M0782_1	pwm	0.639962	0.824454	0.184492
ENCFF822FIY	hematopoietic-multipotent-progenitor-cell	KLF12_MM_SELEX_M6040_1	pwm	0.67559	0.601216	-0.074374
ENCFF986DGM	hematopoietic-multipotent-progenitor-cell	GATA6_MM_PBM_M0782_1	pwm	0.602956	0.641374	0.038418
ENCFF999DAS	hepatocyte	KLF12_MM_SELEX_M6040_1	pwm	0.780642	0.653512	-0.12713
ENCFF767JPZ	HepG2	KLF12_MM_SELEX_M6040_1	pwm	0.66941	0.600434	-0.068976
ENCFF393CAW	HFF-Myc	JUND_HS_SELEX_M0320_1	pwm	0.602958	0.65413	0.051172
ENCFF842ESG	HFF-Myc	JUND_HS_SELEX_M0320_1	pwm	0.645182	0.646324	0.001142
ENCFF185LPE	HL-60	CEBPB_HS_SELEX_M5314_1	pwm	0.68377	0.791142	0.107372
ENCFF185LPE	HL-60	FLI1_HS_SELEX_M5431_1	pwm	0.612034	0.692184	0.08015
ENCFF185LPE	HL-60	HLF_HS_SELEX_M5516_1	pwm	0.671584	0.756118	0.084534
ENCFF505KHS	HL-60	CEBPB_HS_SELEX_M5314_1	pwm	0.661812	0.775572	0.11376
ENCFF505KHS	HL-60	HLF_HS_SELEX_M5516_1	pwm	0.639042	0.72981	0.090768
ENCFF932FKV	HS-27A	JUND_HS_SELEX_M0320_1	pwm	0.64884	0.711528	0.062688
ENCFF331SCZ	HS-5	JUND_HS_SELEX_M0320_1	pwm	0.73444	0.7606	0.02616
ENCFF895BJS	IMR-90	JUND_HS_SELEX_M0320_1	pwm	0.704062	0.754172	0.05011
ENCFF895BJS	IMR-90	XBP1_HS_SELEX_M5952_1	pwm	0.604736	0.613518	0.008782
7	iPS-DF-4	FLI1_HS_SELEX_M5431_1	pwm	0.604496	0.616272	0.011776
ENCFF231PPP	iris-pigment-epithelial-cell	CEBPB_HS_SELEX_M5314_1	pwm	0.617474	0.652398	0.034924
ENCFF231PPP	iris-pigment-epithelial-cell	HLF_HS_SELEX_M5516_1	pwm	0.601732	0.66432	0.062588
ENCFF231PPP	iris-pigment-epithelial-cell	JUND_HS_SELEX_M0320_1	pwm	0.724528	0.728362	0.003834
ENCFF272LQP	iris-pigment-epithelial-cell	JUND_HS_SELEX_M0320_1	pwm	0.62838	0.697952	0.069572
ENCFF304GVP	Jurkat-clone-E61	MYBL1_HS_SELEX_M5645_1	pwm	0.614802	0.683864	0.069062
ENCFF623AFX	K562	KLF12_MM_SELEX_M6040_1	pwm	0.7624	0.687126	-0.075274
ENCFF499HUD	KBM-7	ELF1_HS_SELEX_M5373_1	pwm	0.659604	0.766088	0.106484
ENCFF499HUD	KBM-7	FLI1_HS_SELEX_M5431_1	pwm	0.667976	0.823616	0.15564
ENCFF499HUD	KBM-7	GATA6_MM_PBM_M0782_1	pwm	0.60261	0.614416	0.011806
ENCFF499HUD	KBM-7	SFPI1_HS_SELEX_M5863_1	pwm	0.633274	0.74831	0.115036
ENCFF566JBQ	keratinocyte	JUND_HS_SELEX_M0320_1	pwm	0.691278	0.71073	0.019452
ENCFF566JBQ	keratinocyte	P53_HS_SELEX_M6105_1	pwm	0.60308	0.712634	0.109554
ENCFF894LMB	keratinocyte	JUND_HS_SELEX_M0320_1	pwm	0.727728	0.699916	-0.027812
ENCFF050XEY	kidney	KLF12_MM_SELEX_M6040_1	pwm	0.75897	0.61813	-0.14084
ENCFF215RET	kidney	KLF12_MM_SELEX_M6040_1	pwm	0.748648	0.645062	-0.103586
ENCFF215RET	kidney	ZNF202_MM_PBM_M0404_1	pwm	0.60406	0.671698	0.067638
ENCFF288VDM	kidney	KLF12_MM_SELEX_M6040_1	pwm	0.78435	0.621006	-0.163344
ENCFF288VDM	kidney	ZNF202_MM_PBM_M0404_1	pwm	0.612152	0.618878	0.006726
ENCFF743APB	kidney	LHX4_MM_SELEX_M6041_1	pwm	0.711802	0.620778	-0.091024
ENCFF743APB	kidney	VENTXpbm_HS_PBM_M0896_1	pwm	0.662014	0.610478	-0.051536
ENCFF358CBP	kidney-epithelial-cell	JUND_HS_SELEX_M0320_1	pwm	0.770638	0.73454	-0.036098
ENCFF752VHK	kidney-epithelial-cell	JUND_HS_SELEX_M0320_1	pwm	0.740104	0.74197	0.001866
ENCFF058ACJ	large-intestine	GATA6_MM_PBM_M0782_1	pwm	0.63568	0.615102	-0.020578
ENCFF416JUZ	large-intestine	KLF12_MM_SELEX_M6040_1	pwm	0.6122	0.613176	0.000976
ENCFF494EIC	large-intestine	KLF12_MM_SELEX_M6040_1	pwm	0.72916	0.605058	-0.124102
ENCFF523ZGF	large-intestine	KLF12_MM_SELEX_M6040_1	pwm	0.66476	0.61944	-0.04532
ENCFF555ZGP	large-intestine	KLF12_MM_SELEX_M6040_1	pwm	0.683294	0.613474	-0.06982
ENCFF794IVB	large-intestine	KLF12_MM_SELEX_M6040_1	pwm	0.68098	0.647576	-0.033404
ENCFF811USD	large-intestine	KLF12_MM_SELEX_M6040_1	pwm	0.65082	0.622498	-0.028322
ENCFF920DDN	large-intestine	KLF12_MM_SELEX_M6040_1	pwm	0.640304	0.62012	-0.020184
ENCFF476LDM	left-kidney	LHX4_MM_SELEX_M6041_1	pwm	0.690158	0.60796	-0.082198
ENCFF233TRB	left-lung	NFIX_HS_SELEX_M5665_1	pwm	0.621724	0.70387	0.082146
ENCFF663LIJ	left-lung	CEBPB_HS_SELEX_M5314_1	pwm	0.616734	0.60203	-0.014704
ENCFF663LIJ	left-lung	NFIX_HS_SELEX_M5665_1	pwm	0.61131	0.665156	0.053846
ENCFF794AMB	left-lung	CEBPB_HS_SELEX_M5314_1	pwm	0.617642	0.610284	-0.007358
ENCFF827RCC	left-lung	CEBPB_HS_SELEX_M5314_1	pwm	0.625954	0.605004	-0.02095
ENCFF827RCC	left-lung	NFIX_HS_SELEX_M5665_1	pwm	0.613202	0.690008	0.076806
ENCFF206SZY	left-renal-cortex-interstitium	LHX4_MM_SELEX_M6041_1	pwm	0.66307	0.601484	-0.061586
ENCFF132BIV	left-renal-pelvis	LHX4_MM_SELEX_M6041_1	pwm	0.653746	0.611332	-0.042414
ENCFF286LYP	liver	KLF12_MM_SELEX_M6040_1	pwm	0.832042	0.69154	-0.140502
ENCFF286LYP	liver	ZNF202_MM_PBM_M0404_1	pwm	0.607622	0.622658	0.015036
ENCFF452EGS	LNCaP-clone-FGC	FOXA2_MM_PBM_M0729_1	pwm	0.622708	0.753302	0.130594
ENCFF452EGS	LNCaP-clone-FGC	NFIX_HS_SELEX_M5665_1	pwm	0.633524	0.736444	0.10292
ENCFF806PZH	LNCaP-clone-FGC	NFIX_HS_SELEX_M5665_1	pwm	0.607984	0.76105	0.153066
ENCFF011JIY	lower-leg-skin	KLF12_MM_SELEX_M6040_1	pwm	0.742848	0.6396	-0.103248
ENCFF011JIY	lower-leg-skin	NFIX_HS_SELEX_M5665_1	pwm	0.602718	0.603996	0.001278
ENCFF230CHA	lung	NFIX_HS_SELEX_M5665_1	pwm	0.602938	0.670272	0.067334
ENCFF274FLT	lung	CEBPB_HS_SELEX_M5314_1	pwm	0.637362	0.600214	-0.037148
ENCFF274FLT	lung	NFIX_HS_SELEX_M5665_1	pwm	0.6124	0.699704	0.087304
ENCFF391BRB	lung	CEBPB_HS_SELEX_M5314_1	pwm	0.626226	0.623544	-0.002682
ENCFF391BRB	lung	HLF_HS_SELEX_M5516_1	pwm	0.61334	0.602456	-0.010884
ENCFF391BRB	lung	NFIX_HS_SELEX_M5665_1	pwm	0.627924	0.68709	0.059166
ENCFF712AKP	lung	CEBPB_HS_SELEX_M5314_1	pwm	0.640642	0.608068	-0.032574
ENCFF744LRT	lung	NFIX_HS_SELEX_M5665_1	pwm	0.61327	0.699752	0.086482
ENCFF165ZIA	lung-microvascular-endothelial-cell	NFIX_HS_SELEX_M5665_1	pwm	0.606072	0.643718	0.037646
ENCFF446FTN	lung-microvascular-endothelial-cell	FLI1_HS_SELEX_M5431_1	pwm	0.620932	0.800922	0.17999
ENCFF446FTN	lung-microvascular-endothelial-cell	JUND_HS_SELEX_M0320_1	pwm	0.631498	0.703892	0.072394
ENCFF460ZFL	lung-microvascular-endothelial-cell	NFIX_HS_SELEX_M5665_1	pwm	0.606466	0.641594	0.035128
ENCFF957JQC	lung-microvascular-endothelial-cell	FLI1_HS_SELEX_M5431_1	pwm	0.619582	0.818796	0.199214
ENCFF238GMN	M059J	JUND_HS_SELEX_M0320_1	pwm	0.702446	0.734818	0.032372
ENCFF767GYT	M059J	JUND_HS_SELEX_M0320_1	pwm	0.711238	0.748968	0.03773
ENCFF757LPN	mammary-epithelial-cell	CEBPB_HS_SELEX_M5314_1	pwm	0.673302	0.66736	-0.005942
ENCFF757LPN	mammary-epithelial-cell	GRHL1_HS_SELEX_M5498_1	pwm	0.600552	0.609654	0.009102
ENCFF757LPN	mammary-epithelial-cell	HLF_HS_SELEX_M5516_1	pwm	0.634504	0.643502	0.008998
ENCFF757LPN	mammary-epithelial-cell	JUND_HS_SELEX_M0320_1	pwm	0.681224	0.679662	-0.001562
ENCFF050MBM	MCF-7	TFCP2_HS_SELEX_M5928_1	pwm	0.612316	0.651544	0.039228
ENCFF078RSH	MCF-7	GRHL1_HS_SELEX_M5498_1	pwm	0.603184	0.684788	0.081604
ENCFF078RSH	MCF-7	TFCP2_HS_SELEX_M5928_1	pwm	0.61767	0.66775	0.05008
ENCFF158BBA	MCF-7	FOXA2_MM_PBM_M0729_1	pwm	0.622116	0.685956	0.06384
ENCFF158BBA	MCF-7	FOXB1_HS_SELEX_M5438_1	pwm	0.61168	0.66092	0.04924
ENCFF158BBA	MCF-7	GRHL1_HS_SELEX_M5498_1	pwm	0.645096	0.687784	0.042688
ENCFF158BBA	MCF-7	TFCP2_HS_SELEX_M5928_1	pwm	0.63941	0.667204	0.027794
ENCFF745UXV	mesenchymal-stem-cell	JUND_HS_SELEX_M0320_1	pwm	0.624302	0.70356	0.079258
ENCFF326SSU	muscle-of-arm	NFATC2_HS_PBM_M1518_1	pwm	0.620038	0.666084	0.046046
ENCFF326SSU	muscle-of-arm	NFIX_HS_SELEX_M5665_1	pwm	0.608972	0.693642	0.08467
ENCFF711VFJ	muscle-of-arm	NFATC2_HS_PBM_M1518_1	pwm	0.609176	0.683062	0.073886
ENCFF837KHA	muscle-of-arm	NFATC2_HS_PBM_M1518_1	pwm	0.603064	0.643452	0.040388
ENCFF996VLV	muscle-of-arm	NFIX_HS_SELEX_M5665_1	pwm	0.600342	0.701322	0.10098
ENCFF191JLB	muscle-of-back	NFATC2_HS_PBM_M1518_1	pwm	0.609422	0.653624	0.044202
ENCFF284MUO	muscle-of-back	NFATC2_HS_PBM_M1518_1	pwm	0.60716	0.672464	0.065304
ENCFF355JBS	muscle-of-back	NFATC2_HS_PBM_M1518_1	pwm	0.60829	0.641234	0.032944
ENCFF540HZS	muscle-of-back	NFATC2_HS_PBM_M1518_1	pwm	0.602686	0.66541	0.062724
ENCFF230WVU	muscle-of-leg	NFATC2_HS_PBM_M1518_1	pwm	0.601544	0.670934	0.06939
ENCFF319CPJ	muscle-of-leg	NFATC2_HS_PBM_M1518_1	pwm	0.600538	0.677834	0.077296
ENCFF630VNL	muscle-of-leg	NFIX_HS_SELEX_M5665_1	pwm	0.601702	0.686726	0.085024
ENCFF041CSB	NB4	CEBPB_HS_SELEX_M5314_1	pwm	0.60664	0.691186	0.084546
ENCFF041CSB	NB4	ELF1_HS_SELEX_M5373_1	pwm	0.6052	0.654734	0.049534
ENCFF041CSB	NB4	FLI1_HS_SELEX_M5431_1	pwm	0.646516	0.717988	0.071472
ENCFF925ZDU	NB4	ELF1_HS_SELEX_M5373_1	pwm	0.603688	0.670608	0.06692
ENCFF925ZDU	NB4	FLI1_HS_SELEX_M5431_1	pwm	0.638992	0.72485	0.085858
ENCFF230SPN	neural-progenitor-cell	LHX4_MM_SELEX_M6041_1	pwm	0.676462	0.603092	-0.07337
ENCFF230SPN	neural-progenitor-cell	VENTXpbm_HS_PBM_M0896_1	pwm	0.620188	0.61981	-0.000378
ENCFF572AAL	neural-progenitor-cell	VENTXpbm_HS_PBM_M0896_1	pwm	0.626898	0.600324	-0.026574
ENCFF687UQV	neural-stem-progenitor-cell	LHX4_MM_SELEX_M6041_1	pwm	0.651686	0.61	-0.041686
ENCFF687UQV	neural-stem-progenitor-cell	VENTXpbm_HS_PBM_M0896_1	pwm	0.638392	0.628172	-0.01022
ENCFF105ETE	non-pigmented-ciliary-epithelial-cell	JUND_HS_SELEX_M0320_1	pwm	0.68232	0.757248	0.074928
ENCFF699EKS	non-pigmented-ciliary-epithelial-cell	JUND_HS_SELEX_M0320_1	pwm	0.70281	0.744332	0.041522
ENCFF699EKS	non-pigmented-ciliary-epithelial-cell	XBP1_HS_SELEX_M5952_1	pwm	0.600344	0.601672	0.001328
ENCFF366XFZ	NT2_D1	VENTXpbm_HS_PBM_M0896_1	pwm	0.628308	0.604448	-0.02386
ENCFF914GVC	omental-fat-pad	KLF12_MM_SELEX_M6040_1	pwm	0.780234	0.666964	-0.11327
ENCFF914GVC	omental-fat-pad	ZNF202_MM_PBM_M0404_1	pwm	0.64136	0.6564	0.01504
ENCFF498QOJ	ovary	KLF12_MM_SELEX_M6040_1	pwm	0.68872	0.615424	-0.073296
ENCFF367WMG	Panc1	JUND_HS_SELEX_M0320_1	pwm	0.661084	0.736384	0.0753
ENCFF553OYG	Panc1	JUND_HS_SELEX_M0320_1	pwm	0.682792	0.721608	0.038816
ENCFF735JRV	pancreas	NFIX_HS_SELEX_M5665_1	pwm	0.603778	0.71953	0.115752
ENCFF040AJP	PC-9	JUND_HS_SELEX_M0320_1	pwm	0.687478	0.683506	-0.003972
ENCFF040AJP	PC-9	TEAD1_HS_SELEX_M5904_1	pwm	0.60066	0.621814	0.021154
ENCFF364RGE	PC-9	JUND_HS_SELEX_M0320_1	pwm	0.72846	0.701058	-0.027402
ENCFF055ZSF	Peyers-patch	KLF12_MM_SELEX_M6040_1	pwm	0.81595	0.752736	-0.063214
ENCFF732XMH	Peyers-patch	KLF12_MM_SELEX_M6040_1	pwm	0.725262	0.704352	-0.02091
ENCFF128BFZ	placenta	CEBPB_HS_SELEX_M5314_1	pwm	0.602888	0.633106	0.030218
ENCFF655ZJF	placenta	KLF12_MM_SELEX_M6040_1	pwm	0.732502	0.617276	-0.115226
ENCFF391OGO	prostate-gland	NFIX_HS_SELEX_M5665_1	pwm	0.603212	0.63656	0.033348
ENCFF523BCF	psoas-muscle	JUND_HS_SELEX_M0320_1	pwm	0.623656	0.686926	0.06327
ENCFF897JBO	pulmonary-artery-endothelial-cell	FLI1_HS_SELEX_M5431_1	pwm	0.648204	0.799508	0.151304
ENCFF897JBO	pulmonary-artery-endothelial-cell	JUND_HS_SELEX_M0320_1	pwm	0.60051	0.6238	0.02329
ENCFF027SVR	renal-cortex-interstitium	LHX4_MM_SELEX_M6041_1	pwm	0.651596	0.60488	-0.046716
ENCFF131FBL	renal-cortex-interstitium	LHX4_MM_SELEX_M6041_1	pwm	0.680396	0.605488	-0.074908
ENCFF718DFS	renal-cortex-interstitium	LHX4_MM_SELEX_M6041_1	pwm	0.651252	0.606978	-0.044274
ENCFF998JMX	renal-cortex-interstitium	LHX4_MM_SELEX_M6041_1	pwm	0.705994	0.62148	-0.084514
ENCFF998JMX	renal-cortex-interstitium	VENTXpbm_HS_PBM_M0896_1	pwm	0.655324	0.616242	-0.039082
ENCFF583YED	renal-cortical-epithelial-cell	JUND_HS_SELEX_M0320_1	pwm	0.722562	0.71319	-0.009372
ENCFF659MOZ	renal-cortical-epithelial-cell	CEBPB_HS_SELEX_M5314_1	pwm	0.610776	0.600032	-0.010744
ENCFF659MOZ	renal-cortical-epithelial-cell	JUND_HS_SELEX_M0320_1	pwm	0.7506	0.696092	-0.054508
ENCFF659MOZ	renal-cortical-epithelial-cell	VENTXpbm_HS_PBM_M0896_1	pwm	0.607518	0.647376	0.039858
ENCFF012SAA	renal-pelvis	VENTXpbm_HS_PBM_M0896_1	pwm	0.64712	0.606854	-0.040266
ENCFF041XBL	renal-pelvis	LHX4_MM_SELEX_M6041_1	pwm	0.710282	0.621742	-0.08854
ENCFF386RDS	renal-pelvis	KLF12_MM_SELEX_M6040_1	pwm	0.679128	0.621016	-0.058112
ENCFF402DMO	retina	LHX4_MM_SELEX_M6041_1	pwm	0.654654	0.677136	0.022482
ENCFF402DMO	retina	VENTXpbm_HS_PBM_M0896_1	pwm	0.63488	0.670434	0.035554
ENCFF248RWN	retinal-pigment-epithelial-cell	JUND_HS_SELEX_M0320_1	pwm	0.640912	0.659484	0.018572
ENCFF248RWN	retinal-pigment-epithelial-cell	OTX1_HS_SELEX_M5699_1	pwm	0.62207	0.720666	0.098596
ENCFF915CHV	retinal-pigment-epithelial-cell	JUND_HS_SELEX_M0320_1	pwm	0.676054	0.655552	-0.020502
ENCFF915CHV	retinal-pigment-epithelial-cell	OTX1_HS_SELEX_M5699_1	pwm	0.602206	0.736234	0.134028
ENCFF119HGJ	right-kidney	LHX4_MM_SELEX_M6041_1	pwm	0.702148	0.600704	-0.101444
ENCFF610JVS	right-kidney	LHX4_MM_SELEX_M6041_1	pwm	0.687798	0.620232	-0.067566
ENCFF610JVS	right-kidney	VENTXpbm_HS_PBM_M0896_1	pwm	0.672974	0.6002	-0.072774
ENCFF036PGY	right-lung	CEBPB_HS_SELEX_M5314_1	pwm	0.607142	0.604412	-0.00273
ENCFF036PGY	right-lung	NFIX_HS_SELEX_M5665_1	pwm	0.620558	0.698646	0.078088
ENCFF046QJY	right-lung	CEBPB_HS_SELEX_M5314_1	pwm	0.628666	0.603148	-0.025518
ENCFF046QJY	right-lung	NFIX_HS_SELEX_M5665_1	pwm	0.601674	0.716282	0.114608
ENCFF134ZJK	right-lung	CEBPB_HS_SELEX_M5314_1	pwm	0.631466	0.60316	-0.028306
ENCFF134ZJK	right-lung	NFIX_HS_SELEX_M5665_1	pwm	0.602664	0.669178	0.066514
ENCFF374BCD	right-renal-pelvis	LHX4_MM_SELEX_M6041_1	pwm	0.68	0.601814	-0.078186
ENCFF203SSC	skeletal-muscle-cell	HLF_HS_SELEX_M5516_1	pwm	0.60242	0.630592	0.028172
ENCFF203SSC	skeletal-muscle-cell	JUND_HS_SELEX_M0320_1	pwm	0.658878	0.6706	0.011722
ENCFF223UWR	skeletal-muscle-myoblast	JUND_HS_SELEX_M0320_1	pwm	0.641166	0.63946	-0.001706
ENCFF962IGI	skeletal-muscle-myoblast	JUND_HS_SELEX_M0320_1	pwm	0.624916	0.629852	0.004936
ENCFF600JNF	SK-MEL-5	JUND_HS_SELEX_M0320_1	pwm	0.6429	0.62408	-0.01882
ENCFF862XVF	SK-MEL-5	JUND_HS_SELEX_M0320_1	pwm	0.636418	0.609698	-0.02672
ENCFF768WKW	SK-N-DZ	GATA6_MM_PBM_M0782_1	pwm	0.608986	0.689864	0.080878
ENCFF768WKW	SK-N-DZ	LHX4_MM_SELEX_M6041_1	pwm	0.641622	0.688622	0.047
ENCFF768WKW	SK-N-DZ	PHOX2B_HS_SELEX_M5715_1	pwm	0.62464	0.721976	0.097336
ENCFF768WKW	SK-N-DZ	VENTXpbm_HS_PBM_M0896_1	pwm	0.635708	0.67474	0.039032
ENCFF865LCY	SK-N-DZ	GATA6_MM_PBM_M0782_1	pwm	0.64481	0.703484	0.058674
ENCFF865LCY	SK-N-DZ	LHX4_MM_SELEX_M6041_1	pwm	0.665874	0.701762	0.035888
ENCFF865LCY	SK-N-DZ	PHOX2B_HS_SELEX_M5715_1	pwm	0.643732	0.729004	0.085272
ENCFF865LCY	SK-N-DZ	VENTXpbm_HS_PBM_M0896_1	pwm	0.65219	0.680184	0.027994
ENCFF063OCF	small-intestine	KLF12_MM_SELEX_M6040_1	pwm	0.710346	0.632798	-0.077548
ENCFF321LTV	small-intestine	GATA6_MM_PBM_M0782_1	pwm	0.601718	0.624082	0.022364
ENCFF321LTV	small-intestine	HLF_HS_SELEX_M5516_1	pwm	0.605484	0.608462	0.002978
ENCFF321LTV	small-intestine	JUND_HS_SELEX_M0320_1	pwm	0.607546	0.600852	-0.006694
ENCFF442AYJ	small-intestine	KLF12_MM_SELEX_M6040_1	pwm	0.669456	0.623534	-0.045922
ENCFF559HGO	small-intestine	KLF12_MM_SELEX_M6040_1	pwm	0.644012	0.60828	-0.035732
ENCFF692AJW	small-intestine	KLF12_MM_SELEX_M6040_1	pwm	0.67003	0.629778	-0.040252
ENCFF722CYJ	small-intestine	KLF12_MM_SELEX_M6040_1	pwm	0.699558	0.629208	-0.07035
ENCFF751OEX	small-intestine	CEBPB_HS_SELEX_M5314_1	pwm	0.62023	0.606482	-0.013748
ENCFF941FIK	small-intestine	KLF12_MM_SELEX_M6040_1	pwm	0.6736	0.618144	-0.055456
ENCFF789TOW	spinal-cord	NFIX_HS_SELEX_M5665_1	pwm	0.61118	0.72963	0.11845
ENCFF587YNA	spleen	FLI1_HS_SELEX_M5431_1	pwm	0.612678	0.718438	0.10576
ENCFF122TCQ	stomach	KLF12_MM_SELEX_M6040_1	pwm	0.67036	0.602734	-0.067626
ENCFF229RBJ	stomach	KLF12_MM_SELEX_M6040_1	pwm	0.728	0.634718	-0.093282
ENCFF241TQC	stomach	KLF12_MM_SELEX_M6040_1	pwm	0.679232	0.601512	-0.07772
ENCFF360CCE	stomach	KLF12_MM_SELEX_M6040_1	pwm	0.66336	0.60378	-0.05958
ENCFF447UPF	stomach	KLF12_MM_SELEX_M6040_1	pwm	0.64964	0.615728	-0.033912
ENCFF543NNF	stomach	KLF12_MM_SELEX_M6040_1	pwm	0.679072	0.608078	-0.070994
ENCFF637ZID	stomach	KLF12_MM_SELEX_M6040_1	pwm	0.661698	0.60332	-0.058378
ENCFF738QCO	stomach	KLF12_MM_SELEX_M6040_1	pwm	0.675872	0.611996	-0.063876
ENCFF877XCF	stomach	KLF12_MM_SELEX_M6040_1	pwm	0.691834	0.613346	-0.078488
ENCFF933ABR	stomach	KLF12_MM_SELEX_M6040_1	pwm	0.66819	0.615604	-0.052586
ENCFF941HUI	stomach	GATA6_MM_PBM_M0782_1	pwm	0.608128	0.654282	0.046154
ENCFF254WCU	stromal-cell-of-bone-marrow	JUND_HS_SELEX_M0320_1	pwm	0.653354	0.731894	0.07854
ENCFF254WCU	stromal-cell-of-bone-marrow	NFIX_HS_SELEX_M5665_1	pwm	0.608098	0.633932	0.025834
ENCFF547MHR	stromal-cell-of-bone-marrow	JUND_HS_SELEX_M0320_1	pwm	0.667848	0.71098	0.043132
ENCFF133ILP	T-cell	ELF1_HS_SELEX_M5373_1	pwm	0.602946	0.659232	0.056286
ENCFF133ILP	T-cell	FLI1_HS_SELEX_M5431_1	pwm	0.61443	0.711652	0.097222
ENCFF168YQF	T-cell	FLI1_HS_SELEX_M5431_1	pwm	0.604872	0.739102	0.13423
ENCFF483RJF	T-helper-17-cell	ELF1_HS_SELEX_M5373_1	pwm	0.607564	0.739122	0.131558
ENCFF483RJF	T-helper-17-cell	FLI1_HS_SELEX_M5431_1	pwm	0.630322	0.805176	0.174854
ENCFF483RJF	T-helper-17-cell	KLF12_MM_SELEX_M6040_1	pwm	0.61846	0.609304	-0.009156
ENCFF012QDX	T-helper-1-cell	ELF1_HS_SELEX_M5373_1	pwm	0.614598	0.745772	0.131174
ENCFF012QDX	T-helper-1-cell	FLI1_HS_SELEX_M5431_1	pwm	0.64588	0.822628	0.176748
ENCFF654MRJ	T-helper-1-cell	FLI1_HS_SELEX_M5431_1	pwm	0.613204	0.781474	0.16827
ENCFF144XMY	T-helper-2-cell	KLF12_MM_SELEX_M6040_1	pwm	0.724912	0.62695	-0.097962
ENCFF481KKG	T-helper-2-cell	FLI1_HS_SELEX_M5431_1	pwm	0.60173	0.74919	0.14746
ENCFF189LKP	thymus	FLI1_HS_SELEX_M5431_1	pwm	0.61468	0.713794	0.099114
ENCFF601PAY	thymus	ELF1_HS_SELEX_M5373_1	pwm	0.605532	0.660314	0.054782
ENCFF601PAY	thymus	FLI1_HS_SELEX_M5431_1	pwm	0.622966	0.700778	0.077812
ENCFF959FMP	thymus	FLI1_HS_SELEX_M5431_1	pwm	0.602568	0.713304	0.110736
ENCFF961JXL	thymus	FLI1_HS_SELEX_M5431_1	pwm	0.605976	0.662706	0.05673
ENCFF861DSY	tibial-artery	KLF12_MM_SELEX_M6040_1	pwm	0.787672	0.604398	-0.183274
ENCFF142WAA	transverse-colon	KLF12_MM_SELEX_M6040_1	pwm	0.680104	0.720034	0.03993
ENCFF161NFM	transverse-colon	KLF12_MM_SELEX_M6040_1	pwm	0.803894	0.738214	-0.06568
ENCFF484TLE	transverse-colon	KLF12_MM_SELEX_M6040_1	pwm	0.658448	0.70674	0.048292
ENCFF562ESR	transverse-colon	KLF12_MM_SELEX_M6040_1	pwm	0.6735	0.711044	0.037544
ENCFF533MFM	trophoblast-cell	CEBPB_HS_SELEX_M5314_1	pwm	0.622428	0.6544	0.031972
ENCFF533MFM	trophoblast-cell	HLF_HS_SELEX_M5516_1	pwm	0.621462	0.620478	-0.000984
ENCFF121XJN	upper-lobe-of-left-lung	KLF12_MM_SELEX_M6040_1	pwm	0.697094	0.622516	-0.074578
ENCFF040LTQ	WERI-Rb-1	LHX4_MM_SELEX_M6041_1	pwm	0.62451	0.605828	-0.018682
ENCFF040LTQ	WERI-Rb-1	OTX1_HS_SELEX_M5699_1	pwm	0.609256	0.798572	0.189316
ENCFF362PAJ	WERI-Rb-1	GATA6_MM_PBM_M0782_1	pwm	0.618452	0.647438	0.028986
ENCFF362PAJ	WERI-Rb-1	ISL2_HS_SELEX_M5583_1	pwm	0.612374	0.619798	0.007424
ENCFF362PAJ	WERI-Rb-1	LHX4_MM_SELEX_M6041_1	pwm	0.609274	0.641004	0.03173
ENCFF362PAJ	WERI-Rb-1	NEUROG2_HS_SELEX_M5653_1	pwm	0.631238	0.675632	0.044394
ENCFF362PAJ	WERI-Rb-1	OLIG1_HS_SELEX_M5690_1	pwm	0.620378	0.654124	0.033746
ENCFF362PAJ	WERI-Rb-1	OTX1_HS_SELEX_M5699_1	pwm	0.72886	0.829484	0.100624
ENCFF362PAJ	WERI-Rb-1	PHOX2B_HS_SELEX_M5715_1	pwm	0.63676	0.672434	0.035674
ENCFF362PAJ	WERI-Rb-1	VENTXselex_HS_SELEX_M5947_1	pwm	0.620162	0.668912	0.04875
ENCFF267YMX	WI38	FLI1_HS_SELEX_M5431_1	pwm	0.623116	0.640214	0.017098
ENCFF267YMX	WI38	JUND_HS_SELEX_M0320_1	pwm	0.78038	0.774584	-0.005796
ENCFF314TNS	WI38	HLF_HS_SELEX_M5516_1	pwm	0.602964	0.62666	0.023696
ENCFF314TNS	WI38	JUND_HS_SELEX_M0320_1	pwm	0.670374	0.728422	0.058048
ENCFF369ALL	WI38	CEBPB_HS_SELEX_M5314_1	pwm	0.616776	0.607876	-0.0089
ENCFF369ALL	WI38	HLF_HS_SELEX_M5516_1	pwm	0.640116	0.651686	0.01157
ENCFF369ALL	WI38	JUND_HS_SELEX_M0320_1	pwm	0.682202	0.72183	0.039628
ENCFF369ALL	WI38	XBP1_HS_SELEX_M5952_1	pwm	0.610888	0.61432	0.003432
ENCFF582GQG	WI38	FLI1_HS_SELEX_M5431_1	pwm	0.612738	0.629734	0.016996
ENCFF582GQG	WI38	JUND_HS_SELEX_M0320_1	pwm	0.747586	0.787496	0.03991
ENCFF470VZX	A549	bZIP	kmer	0.58545	0.647812	0.062362
ENCFF470VZX	A549	FOX	kmer	0.496186	0.602652	0.106466
ENCFF475BVB	A549	bZIP	kmer	0.577104	0.6371	0.059996
ENCFF094AUJ	adrenal-gland	bZIP	kmer	0.550318	0.67661	0.126292
ENCFF094AUJ	adrenal-gland	ESRR-II	kmer	0.510806	0.647286	0.13648
ENCFF094AUJ	adrenal-gland	ESRR	kmer	0.494306	0.694238	0.199932
ENCFF094AUJ	adrenal-gland	NR2E	kmer	0.523746	0.601806	0.07806
ENCFF179WUI	adrenal-gland	E2F_zfC2H2	kmer	0.536012	0.603194	0.067182
ENCFF215UXZ	adrenal-gland	bZIP	kmer	0.55852	0.674536	0.116016
ENCFF215UXZ	adrenal-gland	ESRR-II	kmer	0.496232	0.627358	0.131126
ENCFF215UXZ	adrenal-gland	ESRR	kmer	0.473598	0.669414	0.195816
ENCFF319ZSH	adrenal-gland	bZIP	kmer	0.563136	0.612224	0.049088
ENCFF319ZSH	adrenal-gland	ESRR	kmer	0.49162	0.64085	0.14923
ENCFF352HSZ	adrenal-gland	ESRR	kmer	0.490572	0.630814	0.140242
ENCFF525FRH	adrenal-gland	bZIP	kmer	0.56259	0.619768	0.057178
ENCFF525FRH	adrenal-gland	ESRR-II	kmer	0.522234	0.614186	0.091952
ENCFF525FRH	adrenal-gland	ESRR	kmer	0.493278	0.658994	0.165716
ENCFF829ZEZ	adrenal-gland	bZIP	kmer	0.574828	0.626926	0.052098
ENCFF829ZEZ	adrenal-gland	ESRR-II	kmer	0.512662	0.602214	0.089552
ENCFF829ZEZ	adrenal-gland	ESRR	kmer	0.480572	0.641708	0.161136
ENCFF308QOO	AG04449	bZIP	kmer	0.595894	0.601732	0.005838
ENCFF308QOO	AG04449	TEA	kmer	0.567202	0.669214	0.102012
ENCFF973CKA	AG04449	TEA	kmer	0.580634	0.657278	0.076644
ENCFF911OBG	AG04450	bZIP	kmer	0.563684	0.623708	0.060024
ENCFF911OBG	AG04450	FOX	kmer	0.505042	0.612214	0.107172
ENCFF991QFJ	AG04450	bZIP	kmer	0.566548	0.613226	0.046678
ENCFF991QFJ	AG04450	FOX	kmer	0.494736	0.602454	0.107718
ENCFF034CJK	AG09309	CEBP	kmer	0.564288	0.611188	0.0469
ENCFF952FSO	AG09309	CEBP	kmer	0.557832	0.605238	0.047406
ENCFF952FSO	AG09309	TEA	kmer	0.567226	0.621232	0.054006
ENCFF413SVK	AG09319	CEBP	kmer	0.54493	0.609742	0.064812
ENCFF507FBF	AG09319	CEBP	kmer	0.555832	0.603158	0.047326
ENCFF062LRW	AG10803	CEBP	kmer	0.561846	0.609366	0.04752
ENCFF062LRW	AG10803	TEA	kmer	0.56006	0.634686	0.074626
ENCFF964MRO	AG10803	CEBP	kmer	0.552654	0.605106	0.052452
ENCFF964MRO	AG10803	TEA	kmer	0.567832	0.630678	0.062846
ENCFF316LBU	amniotic-epithelial-cell	CEBP	kmer	0.57737	0.643942	0.066572
ENCFF316LBU	amniotic-epithelial-cell	TEA	kmer	0.544964	0.601366	0.056402
ENCFF727SDN	amniotic-epithelial-cell	CEBP	kmer	0.561716	0.629492	0.067776
ENCFF399UZY	astrocyte	TEA	kmer	0.595252	0.619444	0.024192
ENCFF803JHO	astrocyte	TEA	kmer	0.5555	0.608288	0.052788
ENCFF057PEY	astrocyte-of-the-cerebellum	TEA	kmer	0.53661	0.600788	0.064178
ENCFF819ZIM	astrocyte-of-the-cerebellum	TEA	kmer	0.566676	0.601688	0.035012
ENCFF662JPI	astrocyte-of-the-hippocampus	bZIP	kmer	0.5922	0.602984	0.010784
ENCFF662JPI	astrocyte-of-the-hippocampus	TEA	kmer	0.52097	0.629838	0.108868
ENCFF698ZFJ	astrocyte-of-the-hippocampus	TEA	kmer	0.500032	0.621668	0.121636
ENCFF452BSD	astrocyte-of-the-spinal-cord	bZIP	kmer	0.594636	0.637026	0.04239
ENCFF674LBB	astrocyte-of-the-spinal-cord	bZIP	kmer	0.557166	0.657588	0.100422
ENCFF674LBB	astrocyte-of-the-spinal-cord	NR2E	kmer	0.536794	0.626622	0.089828
ENCFF159HJV	B-cell	ETSIII	kmer	0.516004	0.651542	0.135538
ENCFF263YRO	B-cell	ETSIII	kmer	0.513288	0.627124	0.113836
ENCFF403PJS	B-cell	ETSIII	kmer	0.528542	0.618368	0.089826
ENCFF581UTE	B-cell	ETS	kmer	0.586552	0.6424	0.055848
ENCFF581UTE	B-cell	zfC2H2_RHD	kmer	0.587552	0.635768	0.048216
ENCFF147CSC	BE2C	AP2	kmer	0.488572	0.60134	0.112768
ENCFF147CSC	BE2C	Hbox-III	kmer	0.538116	0.61867	0.080554
ENCFF954RNY	BE2C	AP2	kmer	0.515816	0.612502	0.096686
ENCFF954RNY	BE2C	Hbox-III	kmer	0.557566	0.632308	0.074742
ENCFF954RNY	BE2C	Hbox-II	kmer	0.57327	0.622022	0.048752
ENCFF524XCQ	bipolar-neuron	E2A	kmer	0.391146	0.625046	0.2339
ENCFF524XCQ	bipolar-neuron	TALE_zfC2H2	kmer	0.525958	0.605556	0.079598
ENCFF950DMO	bipolar-neuron	AP2	kmer	0.466876	0.60627	0.139394
ENCFF950DMO	bipolar-neuron	E2A	kmer	0.394346	0.61966	0.225314
ENCFF950DMO	bipolar-neuron	TALE_zfC2H2	kmer	0.53618	0.606012	0.069832
ENCFF169SUG	BJ	TEA	kmer	0.58362	0.61995	0.03633
ENCFF824OPX	BJ	NR2E	kmer	0.581428	0.613144	0.031716
ENCFF706BCL	body-of-pancreas	E2A	kmer	0.439688	0.661916	0.222228
ENCFF207IYJ	brain	RFX	kmer	0.530728	0.662584	0.131856
ENCFF218ZFS	brain	RFX	kmer	0.559638	0.68645	0.126812
ENCFF230WCV	brain	HIC1	kmer	0.482534	0.626004	0.14347
ENCFF303THQ	brain	RFX	kmer	0.570232	0.6898	0.119568
ENCFF322ZNH	brain	RFX	kmer	0.553714	0.64097	0.087256
ENCFF331KXA	brain	RFX	kmer	0.540946	0.665574	0.124628
ENCFF375XEP	brain	HIC1	kmer	0.48721	0.663014	0.175804
ENCFF457XYZ	brain	HIC1	kmer	0.453648	0.603544	0.149896
ENCFF528GDM	brain	HIC1	kmer	0.461908	0.618674	0.156766
ENCFF528GDM	brain	TALE_zfC2H2	kmer	0.521022	0.615574	0.094552
ENCFF530CGM	brain	HIC1	kmer	0.45129	0.605304	0.154014
ENCFF530CGM	brain	RFX	kmer	0.53416	0.60241	0.06825
ENCFF560YBU	brain	HIC1	kmer	0.47038	0.637152	0.166772
ENCFF722OVO	brain	HIC1	kmer	0.479168	0.603556	0.124388
ENCFF722OVO	brain	RFX	kmer	0.56335	0.617532	0.054182
ENCFF904HGV	brain	RFX	kmer	0.562592	0.63292	0.070328
ENCFF972QQK	brain-pericyte	FOX	kmer	0.528746	0.625976	0.09723
ENCFF338GII	bronchial-epithelial-cell	NR2E	kmer	0.599974	0.621364	0.02139
ENCFF552CWN	bronchial-epithelial-cell	bZIP	kmer	0.555302	0.634928	0.079626
ENCFF552CWN	bronchial-epithelial-cell	NR2E	kmer	0.534008	0.614466	0.080458
ENCFF661YBX	bronchial-epithelial-cell	bZIP	kmer	0.546338	0.611088	0.06475
ENCFF541GPX	Caco-2	zfC2H2_RHD	kmer	0.52453	0.631448	0.106918
ENCFF929UQL	Caco-2	CENP_zfCXXC	kmer	0.568242	0.603578	0.035336
ENCFF929UQL	Caco-2	zfC2H2_RHD	kmer	0.562264	0.624306	0.062042
ENCFF528ZJQ	cardiac-fibroblast	CEBP	kmer	0.55537	0.600782	0.045412
ENCFF528ZJQ	cardiac-fibroblast	ETS	kmer	0.570494	0.606176	0.035682
ENCFF528ZJQ	cardiac-fibroblast	NR2E	kmer	0.585384	0.620432	0.035048
ENCFF957GSL	cardiac-fibroblast	ETS	kmer	0.583972	0.612836	0.028864
ENCFF097RTD	cardiac-muscle-cell	GATA	kmer	0.511812	0.610414	0.098602
ENCFF097RTD	cardiac-muscle-cell	NKX-II	kmer	0.520486	0.613916	0.09343
ENCFF097RTD	cardiac-muscle-cell	NKX	kmer	0.528516	0.615876	0.08736
ENCFF097RTD	cardiac-muscle-cell	TALE_zfC2H2	kmer	0.543664	0.694586	0.150922
ENCFF156RTG	cardiac-muscle-cell	CEBP	kmer	0.52787	0.609824	0.081954
ENCFF664DCZ	cardiac-muscle-cell	GATA	kmer	0.498436	0.604202	0.105766
ENCFF664DCZ	cardiac-muscle-cell	TALE_zfC2H2	kmer	0.536332	0.678296	0.141964
ENCFF862ZMZ	cardiac-muscle-cell	bZIP	kmer	0.556092	0.618828	0.062736
ENCFF862ZMZ	cardiac-muscle-cell	CEBP	kmer	0.541544	0.635408	0.093864
ENCFF090WJW	cardiovascular-progenitor-cell	GATA	kmer	0.504014	0.612078	0.108064
ENCFF090WJW	cardiovascular-progenitor-cell	TEA	kmer	0.504516	0.608214	0.103698
ENCFF836DBU	cardiovascular-progenitor-cell	GATA	kmer	0.503426	0.643868	0.140442
ENCFF836DBU	cardiovascular-progenitor-cell	TALE_zfC2H2	kmer	0.551148	0.610356	0.059208
ENCFF063IUG	CD14-positive-monocyte	CEBP	kmer	0.564698	0.630684	0.065986
ENCFF063IUG	CD14-positive-monocyte	ETSIII	kmer	0.582602	0.688176	0.105574
ENCFF063IUG	CD14-positive-monocyte	NR2E	kmer	0.591928	0.615586	0.023658
ENCFF063IUG	CD14-positive-monocyte	TALE_zfC2H2	kmer	0.569072	0.60901	0.039938
ENCFF063IUG	CD14-positive-monocyte	TFE3	kmer	0.593968	0.614456	0.020488
ENCFF289XSM	CD14-positive-monocyte	bZIP	kmer	0.591078	0.639226	0.048148
ENCFF289XSM	CD14-positive-monocyte	CEBP	kmer	0.546782	0.626596	0.079814
ENCFF289XSM	CD14-positive-monocyte	ETSIII	kmer	0.530752	0.694852	0.1641
ENCFF289XSM	CD14-positive-monocyte	TALE_zfC2H2	kmer	0.550642	0.608456	0.057814
ENCFF424GPY	CD14-positive-monocyte	CEBP	kmer	0.55521	0.622328	0.067118
ENCFF424GPY	CD14-positive-monocyte	ETSIII	kmer	0.577088	0.713324	0.136236
ENCFF424GPY	CD14-positive-monocyte	NR2E	kmer	0.582292	0.622036	0.039744
ENCFF815GDP	CD14-positive-monocyte	CEBP	kmer	0.586368	0.65558	0.069212
ENCFF096NVD	CD1c-positive-myeloid-dendritic-cell	ETSIII	kmer	0.507836	0.622762	0.114926
ENCFF267VKD	CD1c-positive-myeloid-dendritic-cell	ETSIII	kmer	0.54166	0.719366	0.177706
ENCFF703UHS	CD4-positive_-alpha-beta-T-cell	ETS	kmer	0.59909	0.663234	0.064144
ENCFF663INK	CD8-positive_-alpha-beta-T-cell	bZIP	kmer	0.580448	0.602	0.021552
ENCFF512IPA	choroid-plexus-epithelial-cell	bZIP	kmer	0.55818	0.60302	0.04484
ENCFF719FXT	choroid-plexus-epithelial-cell	bZIP	kmer	0.572288	0.632038	0.05975
ENCFF719FXT	choroid-plexus-epithelial-cell	CEBP	kmer	0.542134	0.606206	0.064072
ENCFF437IAA	CMK	ETSIII	kmer	0.540256	0.620636	0.08038
ENCFF437IAA	CMK	GATA	kmer	0.555098	0.717028	0.16193
ENCFF024DAR	common-myeloid-progenitor_-CD34-positive	ETSIII	kmer	0.536524	0.629492	0.092968
ENCFF024DAR	common-myeloid-progenitor_-CD34-positive	GATA	kmer	0.50866	0.611512	0.102852
ENCFF059VUS	common-myeloid-progenitor_-CD34-positive	ETSIII	kmer	0.550446	0.628052	0.077606
ENCFF059VUS	common-myeloid-progenitor_-CD34-positive	GATA	kmer	0.514312	0.615418	0.101106
ENCFF110CYC	common-myeloid-progenitor_-CD34-positive	ETSIII	kmer	0.537114	0.635724	0.09861
ENCFF110CYC	common-myeloid-progenitor_-CD34-positive	GATA	kmer	0.523938	0.608696	0.084758
ENCFF171LSI	common-myeloid-progenitor_-CD34-positive	ETSIII	kmer	0.543302	0.63013	0.086828
ENCFF171LSI	common-myeloid-progenitor_-CD34-positive	GATA	kmer	0.510112	0.605848	0.095736
ENCFF365IGK	common-myeloid-progenitor_-CD34-positive	ETSIII	kmer	0.5683	0.642044	0.073744
ENCFF365IGK	common-myeloid-progenitor_-CD34-positive	GATA	kmer	0.533222	0.6162	0.082978
ENCFF388FUA	common-myeloid-progenitor_-CD34-positive	ETSIII	kmer	0.514638	0.642198	0.12756
ENCFF450BGX	common-myeloid-progenitor_-CD34-positive	ETSIII	kmer	0.544726	0.62805	0.083324
ENCFF450BGX	common-myeloid-progenitor_-CD34-positive	GATA	kmer	0.54246	0.60695	0.06449
ENCFF725QIG	common-myeloid-progenitor_-CD34-positive	ETSIII	kmer	0.561322	0.637862	0.07654
ENCFF725QIG	common-myeloid-progenitor_-CD34-positive	GATA	kmer	0.52043	0.615032	0.094602
ENCFF743UIM	common-myeloid-progenitor_-CD34-positive	ETSIII	kmer	0.541118	0.62656	0.085442
ENCFF743UIM	common-myeloid-progenitor_-CD34-positive	GATA	kmer	0.51387	0.619076	0.105206
ENCFF854EJY	common-myeloid-progenitor_-CD34-positive	ETSIII	kmer	0.547	0.629936	0.082936
ENCFF856BCY	common-myeloid-progenitor_-CD34-positive	ETSIII	kmer	0.581866	0.662518	0.080652
ENCFF929VDK	common-myeloid-progenitor_-CD34-positive	ETSIII	kmer	0.567932	0.648402	0.08047
ENCFF929VDK	common-myeloid-progenitor_-CD34-positive	GATA	kmer	0.530782	0.608696	0.077914
ENCFF221FND	Daoy	bZIP	kmer	0.588184	0.68296	0.094776
ENCFF221FND	Daoy	NR2E	kmer	0.523178	0.626138	0.10296
ENCFF948FCS	Daoy	NR2E	kmer	0.574306	0.642646	0.06834
ENCFF045UNP	dermis-blood-vessel-endothelial-cell	bZIP	kmer	0.58762	0.620816	0.033196
ENCFF045UNP	dermis-blood-vessel-endothelial-cell	ETSIII	kmer	0.535102	0.62099	0.085888
ENCFF084LGH	dermis-blood-vessel-endothelial-cell	ETS	kmer	0.59506	0.781704	0.186644
ENCFF084LGH	dermis-blood-vessel-endothelial-cell	NFAT	kmer	0.502416	0.628936	0.12652
ENCFF419NYS	dermis-blood-vessel-endothelial-cell	ETSIII	kmer	0.560094	0.609836	0.049742
ENCFF419NYS	dermis-blood-vessel-endothelial-cell	FOX	kmer	0.508896	0.607856	0.09896
ENCFF614FYH	dermis-blood-vessel-endothelial-cell	bZIP	kmer	0.576798	0.608728	0.03193
ENCFF614FYH	dermis-blood-vessel-endothelial-cell	ETS	kmer	0.589674	0.767772	0.178098
ENCFF614FYH	dermis-blood-vessel-endothelial-cell	SOX	kmer	0.502376	0.612914	0.110538
ENCFF780DOD	dermis-blood-vessel-endothelial-cell	ETSIII	kmer	0.567674	0.609512	0.041838
ENCFF780DOD	dermis-blood-vessel-endothelial-cell	SOXC	kmer	0.545978	0.603518	0.05754
ENCFF780DOD	dermis-blood-vessel-endothelial-cell	SOX	kmer	0.572932	0.620446	0.047514
ENCFF823QRP	dermis-blood-vessel-endothelial-cell	NFAT	kmer	0.518054	0.61754	0.099486
ENCFF366UHV	dermis-microvascular-lymphatic-vessel-endothelial-cell	bZIP	kmer	0.57493	0.609158	0.034228
ENCFF366UHV	dermis-microvascular-lymphatic-vessel-endothelial-cell	FOX	kmer	0.525046	0.63776	0.112714
ENCFF606XQS	dermis-microvascular-lymphatic-vessel-endothelial-cell	FOX	kmer	0.518488	0.647996	0.129508
ENCFF734QSB	dermis-microvascular-lymphatic-vessel-endothelial-cell	FOX	kmer	0.547582	0.632354	0.084772
ENCFF734QSB	dermis-microvascular-lymphatic-vessel-endothelial-cell	NFAT	kmer	0.543436	0.654074	0.110638
ENCFF878LVP	dermis-microvascular-lymphatic-vessel-endothelial-cell	FOX	kmer	0.529894	0.621572	0.091678
ENCFF878LVP	dermis-microvascular-lymphatic-vessel-endothelial-cell	NFAT	kmer	0.553876	0.64866	0.094784
ENCFF153SDP	EL	NR2E	kmer	0.589542	0.603912	0.01437
ENCFF153SDP	EL	TEA	kmer	0.55416	0.652122	0.097962
ENCFF513DVK	EL	bZIP	kmer	0.59911	0.674552	0.075442
ENCFF513DVK	EL	NR2E	kmer	0.561366	0.609164	0.047798
ENCFF513DVK	EL	TEA	kmer	0.51559	0.631002	0.115412
ENCFF073TCP	endodermal-cell	zfC2H2_RHD	kmer	0.58802	0.654106	0.066086
ENCFF222SCR	endodermal-cell	PLAGL1	kmer	0.54613	0.617264	0.071134
ENCFF097KBE	endothelial-cell-of-umbilical-vein	ETS	kmer	0.599266	0.727482	0.128216
ENCFF097KBE	endothelial-cell-of-umbilical-vein	FOX	kmer	0.507574	0.624424	0.11685
ENCFF330HEK	endothelial-cell-of-umbilical-vein	ETSIII	kmer	0.557412	0.6084	0.050988
ENCFF330HEK	endothelial-cell-of-umbilical-vein	NR2E	kmer	0.5886	0.600848	0.012248
ENCFF527EJQ	epithelial-cell-of-esophagus	bZIP	kmer	0.598174	0.653584	0.05541
ENCFF527EJQ	epithelial-cell-of-esophagus	NR2E	kmer	0.58278	0.622386	0.039606
ENCFF238YWY	epithelial-cell-of-prostate	NR2E	kmer	0.591252	0.619368	0.028116
ENCFF231GLQ	epithelial-cell-of-proximal-tubule	TEA	kmer	0.578848	0.611358	0.03251
ENCFF720MLF	eye	TALE_zfC2H2	kmer	0.5298	0.601656	0.071856
ENCFF984RUT	eye	Hbox-III	kmer	0.509108	0.612062	0.102954
ENCFF984RUT	eye	TALE_zfC2H2	kmer	0.515586	0.613328	0.097742
ENCFF063MTX	fibroblast-of-gingiva	CEBP	kmer	0.567706	0.643458	0.075752
ENCFF741BMK	fibroblast-of-gingiva	CEBP	kmer	0.549652	0.629416	0.079764
ENCFF331SYD	fibroblast-of-lung	NR2E	kmer	0.595058	0.610024	0.014966
ENCFF331SYD	fibroblast-of-lung	TEA	kmer	0.583256	0.623396	0.04014
ENCFF334RSR	fibroblast-of-lung	bZIP	kmer	0.572316	0.60778	0.035464
ENCFF334RSR	fibroblast-of-lung	CEBP	kmer	0.545174	0.605216	0.060042
ENCFF644XOI	fibroblast-of-lung	CEBP	kmer	0.559958	0.616064	0.056106
ENCFF089IWT	fibroblast-of-peridontal-ligament	bZIP	kmer	0.594636	0.61039	0.015754
ENCFF089IWT	fibroblast-of-peridontal-ligament	CEBP	kmer	0.536736	0.608722	0.071986
ENCFF620HKT	fibroblast-of-peridontal-ligament	CEBP	kmer	0.560442	0.61419	0.053748
ENCFF385ZNB	fibroblast-of-pulmonary-artery	bZIP	kmer	0.584638	0.63781	0.053172
ENCFF385ZNB	fibroblast-of-pulmonary-artery	CEBP	kmer	0.561752	0.630788	0.069036
ENCFF385ZNB	fibroblast-of-pulmonary-artery	ETS	kmer	0.59443	0.632218	0.037788
ENCFF417VBX	fibroblast-of-pulmonary-artery	bZIP	kmer	0.576702	0.650276	0.073574
ENCFF417VBX	fibroblast-of-pulmonary-artery	CEBP	kmer	0.54212	0.619716	0.077596
ENCFF417VBX	fibroblast-of-pulmonary-artery	ETS	kmer	0.562314	0.609762	0.047448
ENCFF045KGY	fibroblast-of-skin-of-abdomen	TEA	kmer	0.550072	0.62034	0.070268
ENCFF336MQK	fibroblast-of-skin-of-left-biceps	TEA	kmer	0.539144	0.617078	0.077934
ENCFF837VPM	fibroblast-of-skin-of-left-biceps	NFAT	kmer	0.54121	0.604314	0.063104
ENCFF837VPM	fibroblast-of-skin-of-left-biceps	TEA	kmer	0.535136	0.622206	0.08707
ENCFF474QAJ	fibroblast-of-skin-of-left-quadriceps	TEA	kmer	0.532236	0.620698	0.088462
ENCFF488SRU	fibroblast-of-skin-of-left-quadriceps	TEA	kmer	0.532608	0.618804	0.086196
ENCFF382NHI	fibroblast-of-skin-of-right-biceps	TEA	kmer	0.561992	0.634308	0.072316
ENCFF191HPU	fibroblast-of-skin-of-right-quadriceps	bZIP	kmer	0.590944	0.629046	0.038102
ENCFF191HPU	fibroblast-of-skin-of-right-quadriceps	TEA	kmer	0.53366	0.623214	0.089554
ENCFF163TAJ	fibroblast-of-skin-of-scalp	TEA	kmer	0.540438	0.663172	0.122734
ENCFF594OFO	fibroblast-of-skin-of-scalp	TEA	kmer	0.548278	0.658498	0.11022
ENCFF073TWU	fibroblast-of-skin-of-upper-back	bZIP	kmer	0.579224	0.605578	0.026354
ENCFF073TWU	fibroblast-of-skin-of-upper-back	TEA	kmer	0.54633	0.63128	0.08495
ENCFF469AJE	fibroblast-of-skin-of-upper-back	TEA	kmer	0.55162	0.639534	0.087914
ENCFF904WZA	fibroblast-of-the-aortic-adventitia	CEBP	kmer	0.560674	0.601766	0.041092
ENCFF990HMA	fibroblast-of-the-aortic-adventitia	bZIP	kmer	0.58627	0.618714	0.032444
ENCFF272AFT	fibroblast-of-the-conjunctiva	CEBP	kmer	0.548608	0.626016	0.077408
ENCFF764ODA	fibroblast-of-the-conjunctiva	CEBP	kmer	0.538764	0.63358	0.094816
ENCFF221FPW	fibroblast-of-villous-mesenchyme	CEBP	kmer	0.52671	0.62099	0.09428
ENCFF311UAO	fibroblast-of-villous-mesenchyme	bZIP	kmer	0.567534	0.604936	0.037402
ENCFF311UAO	fibroblast-of-villous-mesenchyme	CEBP	kmer	0.558566	0.63037	0.071804
ENCFF311UAO	fibroblast-of-villous-mesenchyme	FOX	kmer	0.523904	0.60275	0.078846
ENCFF850STV	forelimb-muscle	E2A	kmer	0.446024	0.606122	0.160098
ENCFF850STV	forelimb-muscle	NFAT	kmer	0.500362	0.661894	0.161532
ENCFF032LRL	foreskin-fibroblast	TEA	kmer	0.535816	0.602882	0.067066
ENCFF090PQC	foreskin-fibroblast	bZIP	kmer	0.53656	0.607276	0.070716
ENCFF169THH	foreskin-fibroblast	bZIP	kmer	0.577202	0.646678	0.069476
ENCFF169THH	foreskin-fibroblast	NR2E	kmer	0.548986	0.614422	0.065436
ENCFF811FJV	foreskin-fibroblast	bZIP	kmer	0.585208	0.657676	0.072468
ENCFF811FJV	foreskin-fibroblast	NR2E	kmer	0.55103	0.632028	0.080998
ENCFF331ODX	foreskin-melanocyte	SOXC	kmer	0.538136	0.601262	0.063126
ENCFF838FGZ	foreskin-melanocyte	SOXC	kmer	0.545586	0.600542	0.054956
ENCFF838FGZ	foreskin-melanocyte	TFE3	kmer	0.58492	0.639778	0.054858
ENCFF758SYE	gastrocnemius-medialis	E2A	kmer	0.435996	0.604598	0.168602
ENCFF927KUT	glomerular-endothelial-cell	ETSIII	kmer	0.551216	0.605974	0.054758
ENCFF993TCA	glomerular-endothelial-cell	ETSIII	kmer	0.56584	0.611742	0.045902
ENCFF993TCA	glomerular-endothelial-cell	FOX	kmer	0.58034	0.614522	0.034182
ENCFF993TCA	glomerular-endothelial-cell	SOX	kmer	0.542374	0.601106	0.058732
ENCFF553BZD	GM04503	TEA	kmer	0.585462	0.628096	0.042634
ENCFF287SCA	GM04504	bZIP	kmer	0.57279	0.623362	0.050572
ENCFF097IKA	GM12864	IRF4-6	kmer	0.508166	0.611454	0.103288
ENCFF097IKA	GM12864	IRF	kmer	0.54585	0.680518	0.134668
ENCFF004PBJ	GM12865	IRF4-6	kmer	0.516262	0.615888	0.099626
ENCFF004PBJ	GM12865	IRF	kmer	0.527724	0.69186	0.164136
ENCFF745COY	GM12865	ETS	kmer	0.594232	0.64405	0.049818
ENCFF745COY	GM12865	IRF	kmer	0.515094	0.63849	0.123396
ENCFF097LEF	GM12878	ETSIII	kmer	0.52151	0.611692	0.090182
ENCFF097LEF	GM12878	IRF	kmer	0.535618	0.610546	0.074928
ENCFF273MVV	GM12878	IRF	kmer	0.562204	0.678862	0.116658
ENCFF665HCW	GM23248	NR2E	kmer	0.585762	0.645004	0.059242
ENCFF959RZS	GM23248	bZIP	kmer	0.588178	0.687506	0.099328
ENCFF959RZS	GM23248	NR2E	kmer	0.573084	0.632342	0.059258
ENCFF810HAS	GM23338	zfC2H2_RHD	kmer	0.555504	0.60999	0.054486
ENCFF810YLL	H1	zfC2H2_RHD	kmer	0.52973	0.617284	0.087554
ENCFF520HRA	H7	SOXC	kmer	0.497594	0.61337	0.115776
ENCFF520HRA	H7	ZIC	kmer	0.49626	0.61803	0.12177
ENCFF870MCD	H7	POU	kmer	0.511694	0.606882	0.095188
ENCFF665MFK	HAP-1	PITX	kmer	0.56234	0.632106	0.069766
ENCFF665MFK	HAP-1	POU	kmer	0.565964	0.613782	0.047818
ENCFF665MFK	HAP-1	SOXC	kmer	0.55981	0.608786	0.048976
ENCFF665MFK	HAP-1	SOX	kmer	0.550444	0.600662	0.050218
ENCFF953MDZ	HAP-1	PITX	kmer	0.549518	0.640552	0.091034
ENCFF953MDZ	HAP-1	POU	kmer	0.534476	0.607666	0.07319
ENCFF175RBN	HCT116	bZIP	kmer	0.578636	0.709978	0.131342
ENCFF175RBN	HCT116	NR2E	kmer	0.550552	0.638672	0.08812
ENCFF228YKV	HCT116	bZIP	kmer	0.589872	0.710612	0.12074
ENCFF228YKV	HCT116	NR2E	kmer	0.550824	0.64982	0.098996
ENCFF007RSQ	heart	TALE_zfC2H2	kmer	0.513722	0.65451	0.140788
ENCFF053SED	heart	GATA	kmer	0.546	0.618548	0.072548
ENCFF053SED	heart	TALE_zfC2H2	kmer	0.560634	0.64824	0.087606
ENCFF086KUU	heart	TALE_zfC2H2	kmer	0.55534	0.659424	0.104084
ENCFF193PBQ	heart	GATA	kmer	0.53732	0.62571	0.08839
ENCFF193PBQ	heart	TALE_zfC2H2	kmer	0.56701	0.684744	0.117734
ENCFF358VDV	heart	GATA	kmer	0.512696	0.600504	0.087808
ENCFF358VDV	heart	TALE_zfC2H2	kmer	0.566842	0.671986	0.105144
ENCFF422GYH	heart	GATA	kmer	0.49336	0.605664	0.112304
ENCFF422GYH	heart	TALE_zfC2H2	kmer	0.523608	0.638458	0.11485
ENCFF590FZJ	heart	TALE_zfC2H2	kmer	0.520754	0.644458	0.123704
ENCFF797TTK	heart	GATA	kmer	0.50588	0.630666	0.124786
ENCFF797TTK	heart	TALE_zfC2H2	kmer	0.534562	0.664894	0.130332
ENCFF805BEX	heart	TALE_zfC2H2	kmer	0.549046	0.6767	0.127654
ENCFF833JBU	heart	TALE_zfC2H2	kmer	0.52141	0.61369	0.09228
ENCFF871GML	heart	GATA	kmer	0.520016	0.606486	0.08647
ENCFF871GML	heart	TALE_zfC2H2	kmer	0.5335	0.668178	0.134678
ENCFF874KUM	heart	GATA	kmer	0.524012	0.605404	0.081392
ENCFF874KUM	heart	TALE_zfC2H2	kmer	0.518946	0.638338	0.119392
ENCFF409QXF	heart-left-ventricle	GATA	kmer	0.509506	0.62947	0.119964
ENCFF520HKD	heart-left-ventricle	GATA	kmer	0.497902	0.602858	0.104956
ENCFF520HKD	heart-left-ventricle	TALE_zfC2H2	kmer	0.531878	0.614488	0.08261
ENCFF939RCS	heart-left-ventricle	ETS	kmer	0.596662	0.63036	0.033698
ENCFF250FRA	heart-right-ventricle	TALE_zfC2H2	kmer	0.515754	0.619424	0.10367
ENCFF687FIQ	heart-right-ventricle	GATA	kmer	0.506412	0.60981	0.103398
ENCFF006OZN	HeLa-S3	GMEB_MADF	kmer	0.590048	0.605628	0.01558
ENCFF241GBQ	hematopoietic-multipotent-progenitor-cell	ETSIII	kmer	0.531926	0.649548	0.117622
ENCFF495SEM	hematopoietic-multipotent-progenitor-cell	ETSIII	kmer	0.535682	0.628144	0.092462
ENCFF495SEM	hematopoietic-multipotent-progenitor-cell	GATA	kmer	0.497756	0.605232	0.107476
ENCFF570PDT	hematopoietic-multipotent-progenitor-cell	ETSIII	kmer	0.5312	0.612728	0.081528
ENCFF721SJU	hematopoietic-multipotent-progenitor-cell	GATA	kmer	0.50523	0.809256	0.304026
ENCFF733JSK	hematopoietic-multipotent-progenitor-cell	GATA	kmer	0.518838	0.804876	0.286038
ENCFF822FIY	hematopoietic-multipotent-progenitor-cell	GATA	kmer	0.50182	0.765376	0.263556
ENCFF866SPM	hematopoietic-multipotent-progenitor-cell	ETS	kmer	0.589572	0.626668	0.037096
ENCFF986DGM	hematopoietic-multipotent-progenitor-cell	ETSIII	kmer	0.541056	0.64258	0.101524
ENCFF999DAS	hepatocyte	E2F_zfC2H2	kmer	0.550654	0.60188	0.051226
ENCFF999DAS	hepatocyte	zfC2H2_RHD	kmer	0.586296	0.643158	0.056862
ENCFF767JPZ	HepG2	PLAGL1	kmer	0.509418	0.60027	0.090852
ENCFF767JPZ	HepG2	zfC2H2_RHD	kmer	0.570832	0.617032	0.0462
ENCFF910QEB	HepG2	zfC2H2_RHD	kmer	0.56145	0.605408	0.043958
ENCFF643IDL	HFFc6	bZIP	kmer	0.569558	0.66169	0.092132
ENCFF643IDL	HFFc6	NR2E	kmer	0.551828	0.61539	0.063562
ENCFF931JXH	HFFc6	bZIP	kmer	0.55542	0.678352	0.122932
ENCFF931JXH	HFFc6	NR2E	kmer	0.5598	0.61448	0.05468
ENCFF393CAW	HFF-Myc	bZIP	kmer	0.57018	0.610442	0.040262
ENCFF842ESG	HFF-Myc	bZIP	kmer	0.590552	0.612174	0.021622
ENCFF903ULR	hindlimb-muscle	NFAT	kmer	0.51557	0.6218	0.10623
ENCFF185LPE	HL-60	ETSIII	kmer	0.552602	0.677092	0.12449
ENCFF505KHS	HL-60	CEBP	kmer	0.578068	0.744668	0.1666
ENCFF505KHS	HL-60	ETSIII	kmer	0.5231	0.665132	0.142032
ENCFF932FKV	HS-27A	NR2E	kmer	0.574896	0.605674	0.030778
ENCFF932FKV	HS-27A	TEA	kmer	0.550746	0.664648	0.113902
ENCFF331SCZ	HS-5	NR2E	kmer	0.588104	0.614862	0.026758
ENCFF331SCZ	HS-5	TEA	kmer	0.565716	0.602258	0.036542
ENCFF895BJS	IMR-90	NR2E	kmer	0.594292	0.632182	0.03789
11	iPS-DF-19	POU	kmer	0.515276	0.617298	0.102022
7	iPS-DF-19	POU	kmer	0.511982	0.62868	0.116698
7	iPS-DF-4	POU	kmer	0.50238	0.610238	0.107858
ENCFF231PPP	iris-pigment-epithelial-cell	CEBP	kmer	0.58362	0.624044	0.040424
ENCFF272LQP	iris-pigment-epithelial-cell	CEBP	kmer	0.542994	0.601786	0.058792
ENCFF272LQP	iris-pigment-epithelial-cell	NR2E	kmer	0.569748	0.614702	0.044954
ENCFF103OZQ	islet-precursor-cell	AP2	kmer	0.478758	0.637088	0.15833
ENCFF103OZQ	islet-precursor-cell	TEA	kmer	0.506146	0.62319	0.117044
ENCFF304GVP	Jurkat-clone-E61	E2A	kmer	0.47772	0.660372	0.182652
ENCFF304GVP	Jurkat-clone-E61	TCF7	kmer	0.535638	0.601442	0.065804
ENCFF623AFX	K562	EGR	kmer	0.503004	0.608854	0.10585
ENCFF623AFX	K562	GATA	kmer	0.51306	0.686588	0.173528
ENCFF623AFX	K562	PLAGL1	kmer	0.49131	0.603264	0.111954
ENCFF623AFX	K562	zfC2H2_RHD	kmer	0.565142	0.646356	0.081214
ENCFF623AFX	K562	ZFX	kmer	0.520404	0.616202	0.095798
ENCFF911FIA	Karpas-422	AP2	kmer	0.463898	0.606974	0.143076
ENCFF384AQH	KBM-7	ETSIII	kmer	0.547094	0.70781	0.160716
ENCFF566JBQ	keratinocyte	NR2E	kmer	0.589964	0.614762	0.024798
ENCFF894LMB	keratinocyte	NR2E	kmer	0.598702	0.613848	0.015146
ENCFF050XEY	kidney	zfC2H2_RHD	kmer	0.581586	0.639718	0.058132
ENCFF215RET	kidney	EGR	kmer	0.511346	0.608792	0.097446
ENCFF215RET	kidney	PLAGL1	kmer	0.529688	0.615348	0.08566
ENCFF288VDM	kidney	E2F_zfC2H2	kmer	0.514176	0.60625	0.092074
ENCFF330CNE	kidney	zfC2H2_RHD	kmer	0.58039	0.64926	0.06887
ENCFF384SLZ	kidney	zfC2H2_RHD	kmer	0.49603	0.60592	0.10989
ENCFF403LQM	kidney	zfC2H2_RHD	kmer	0.53018	0.63702	0.10684
ENCFF515FKC	kidney	zfC2H2_RHD	kmer	0.492292	0.606428	0.114136
ENCFF743APB	kidney	zfC2H2_RHD	kmer	0.482188	0.600974	0.118786
ENCFF744IAP	kidney	zfC2H2_RHD	kmer	0.525858	0.653874	0.128016
ENCFF752VHK	kidney-epithelial-cell	TEA	kmer	0.569092	0.61731	0.048218
ENCFF713OZX	L1-S8R	SOXC	kmer	0.50706	0.628968	0.121908
ENCFF713OZX	L1-S8R	SOX	kmer	0.518586	0.62249	0.103904
ENCFF782LZX	L1-S8R	POU	kmer	0.49907	0.606318	0.107248
ENCFF782LZX	L1-S8R	SOXC	kmer	0.50461	0.633246	0.128636
ENCFF782LZX	L1-S8R	SOX	kmer	0.526602	0.630716	0.104114
ENCFF058ACJ	large-intestine	HNF4	kmer	0.500164	0.623838	0.123674
ENCFF196VQQ	large-intestine	ESRR-II	kmer	0.513652	0.607474	0.093822
ENCFF196VQQ	large-intestine	HNF4	kmer	0.502906	0.627588	0.124682
ENCFF196VQQ	large-intestine	TFE3	kmer	0.527772	0.600552	0.07278
ENCFF276FKY	large-intestine	HNF4	kmer	0.516644	0.628702	0.112058
ENCFF494EIC	large-intestine	HNF4	kmer	0.515896	0.618528	0.102632
ENCFF555ZGP	large-intestine	HNF4	kmer	0.506244	0.617366	0.111122
ENCFF663DTX	large-intestine	HNF4	kmer	0.518446	0.625914	0.107468
ENCFF679HWR	large-intestine	HNF4	kmer	0.496402	0.62975	0.133348
ENCFF805JKJ	large-intestine	ESRR-II	kmer	0.52445	0.60323	0.07878
ENCFF805JKJ	large-intestine	HNF4	kmer	0.529144	0.63258	0.103436
ENCFF805JKJ	large-intestine	zfC4	kmer	0.476082	0.60422	0.128138
ENCFF920DDN	large-intestine	HNF4	kmer	0.509066	0.622966	0.1139
ENCFF311ACF	left-kidney	E2F_zfC2H2	kmer	0.576058	0.616396	0.040338
ENCFF311ACF	left-kidney	zfC2H2_RHD	kmer	0.549678	0.617692	0.068014
ENCFF567LLQ	left-kidney	zfC2H2_RHD	kmer	0.473746	0.616932	0.143186
ENCFF663LIJ	left-lung	E2A	kmer	0.442938	0.627714	0.184776
ENCFF690DRM	left-lung	E2A	kmer	0.419816	0.626426	0.20661
ENCFF794AMB	left-lung	E2A	kmer	0.406898	0.609104	0.202206
ENCFF827RCC	left-lung	E2A	kmer	0.43884	0.601398	0.162558
ENCFF286LYP	liver	GATA	kmer	0.504882	0.606864	0.101982
ENCFF452EGS	LNCaP-clone-FGC	FOX	kmer	0.571914	0.696952	0.125038
ENCFF452EGS	LNCaP-clone-FGC	FOXR	kmer	0.54656	0.62497	0.07841
ENCFF452EGS	LNCaP-clone-FGC	HIC1	kmer	0.522908	0.616988	0.09408
ENCFF806PZH	LNCaP-clone-FGC	FOX	kmer	0.54245	0.683038	0.140588
ENCFF806PZH	LNCaP-clone-FGC	FOXR	kmer	0.523016	0.610266	0.08725
ENCFF806PZH	LNCaP-clone-FGC	HIC1	kmer	0.506214	0.64364	0.137426
ENCFF230CHA	lung	E2A	kmer	0.427748	0.60743	0.179682
ENCFF274FLT	lung	E2A	kmer	0.460812	0.611448	0.150636
ENCFF391BRB	lung	E2A	kmer	0.46244	0.62489	0.16245
ENCFF625XNX	lung	FOX	kmer	0.518242	0.600438	0.082196
ENCFF712AKP	lung	E2A	kmer	0.437446	0.605116	0.16767
ENCFF744LRT	lung	E2A	kmer	0.465304	0.612602	0.147298
ENCFF744LRT	lung	FOX	kmer	0.531342	0.603914	0.072572
ENCFF165ZIA	lung-microvascular-endothelial-cell	ETS	kmer	0.588192	0.739138	0.150946
ENCFF165ZIA	lung-microvascular-endothelial-cell	FOX	kmer	0.508524	0.609866	0.101342
ENCFF165ZIA	lung-microvascular-endothelial-cell	NFAT	kmer	0.539386	0.63525	0.095864
ENCFF446FTN	lung-microvascular-endothelial-cell	bZIP	kmer	0.59755	0.661046	0.063496
ENCFF446FTN	lung-microvascular-endothelial-cell	NR2E	kmer	0.562658	0.61732	0.054662
ENCFF460ZFL	lung-microvascular-endothelial-cell	ETS	kmer	0.586544	0.744966	0.158422
ENCFF460ZFL	lung-microvascular-endothelial-cell	FOX	kmer	0.53099	0.636276	0.105286
ENCFF460ZFL	lung-microvascular-endothelial-cell	NFAT	kmer	0.5119	0.643464	0.131564
ENCFF957JQC	lung-microvascular-endothelial-cell	bZIP	kmer	0.556318	0.672114	0.115796
ENCFF957JQC	lung-microvascular-endothelial-cell	ETSIII	kmer	0.531316	0.606824	0.075508
ENCFF957JQC	lung-microvascular-endothelial-cell	NR2E	kmer	0.535134	0.61421	0.079076
ENCFF672BMB	mammary-epithelial-cell	bZIP	kmer	0.53043	0.6658	0.13537
ENCFF672BMB	mammary-epithelial-cell	CEBP	kmer	0.538202	0.624382	0.08618
ENCFF672BMB	mammary-epithelial-cell	NR2E	kmer	0.509126	0.61962	0.110494
ENCFF050MBM	MCF-7	FOX	kmer	0.579384	0.61523	0.035846
ENCFF078RSH	MCF-7	FOX	kmer	0.564044	0.623906	0.059862
ENCFF158BBA	MCF-7	FOX	kmer	0.582842	0.646502	0.06366
ENCFF456VYF	mesendoderm	TEA	kmer	0.50012	0.650128	0.150008
ENCFF099MBG	muscle-of-arm	NFAT	kmer	0.502686	0.649268	0.146582
ENCFF172LKJ	muscle-of-arm	NFAT	kmer	0.5364	0.63452	0.09812
ENCFF307VFD	muscle-of-arm	NFAT	kmer	0.507034	0.694702	0.187668
ENCFF311LCN	muscle-of-arm	NFAT	kmer	0.524508	0.652582	0.128074
ENCFF326SSU	muscle-of-arm	NFAT	kmer	0.546222	0.660834	0.114612
ENCFF332PPZ	muscle-of-arm	E2A	kmer	0.428254	0.601046	0.172792
ENCFF332PPZ	muscle-of-arm	NFAT	kmer	0.525444	0.67165	0.146206
ENCFF523TKA	muscle-of-arm	NFAT	kmer	0.528752	0.665114	0.136362
ENCFF588SBI	muscle-of-arm	NFAT	kmer	0.523206	0.63575	0.112544
ENCFF611CTG	muscle-of-arm	NFAT	kmer	0.498742	0.64963	0.150888
ENCFF711VFJ	muscle-of-arm	E2A	kmer	0.43475	0.607928	0.173178
ENCFF711VFJ	muscle-of-arm	NFAT	kmer	0.55168	0.66989	0.11821
ENCFF715BDS	muscle-of-arm	NFAT	kmer	0.509538	0.63833	0.128792
ENCFF837KHA	muscle-of-arm	NFAT	kmer	0.523216	0.622936	0.09972
ENCFF888NOP	muscle-of-arm	NFAT	kmer	0.528158	0.6462	0.118042
ENCFF991WDM	muscle-of-arm	NFAT	kmer	0.520176	0.651278	0.131102
ENCFF996VLV	muscle-of-arm	NFAT	kmer	0.519078	0.660102	0.141024
ENCFF081UUE	muscle-of-back	E2A	kmer	0.406942	0.61556	0.208618
ENCFF081UUE	muscle-of-back	NFAT	kmer	0.5033	0.64346	0.14016
ENCFF171JLD	muscle-of-back	NFAT	kmer	0.516282	0.646432	0.13015
ENCFF191JLB	muscle-of-back	NFAT	kmer	0.519456	0.644188	0.124732
ENCFF261BTV	muscle-of-back	NFAT	kmer	0.514122	0.620066	0.105944
ENCFF284MUO	muscle-of-back	NFAT	kmer	0.525608	0.667586	0.141978
ENCFF284QST	muscle-of-back	NFAT	kmer	0.52858	0.626678	0.098098
ENCFF355JBS	muscle-of-back	NFAT	kmer	0.531218	0.629414	0.098196
ENCFF397QTB	muscle-of-back	bZIP	kmer	0.554964	0.614	0.059036
ENCFF397QTB	muscle-of-back	TEA	kmer	0.487214	0.609884	0.12267
ENCFF414BFO	muscle-of-back	NFAT	kmer	0.533124	0.674854	0.14173
ENCFF474MZJ	muscle-of-back	NFAT	kmer	0.533406	0.65761	0.124204
ENCFF540HZS	muscle-of-back	NFAT	kmer	0.53326	0.664142	0.130882
ENCFF583HUF	muscle-of-back	NFAT	kmer	0.508892	0.65231	0.143418
ENCFF797QID	muscle-of-back	E2A	kmer	0.39223	0.611156	0.218926
ENCFF797QID	muscle-of-back	NFAT	kmer	0.501068	0.608586	0.107518
ENCFF847WTW	muscle-of-back	NFAT	kmer	0.499238	0.619466	0.120228
ENCFF020LII	muscle-of-leg	NFAT	kmer	0.510258	0.63894	0.128682
ENCFF230WVU	muscle-of-leg	NFAT	kmer	0.524898	0.663712	0.138814
ENCFF319CPJ	muscle-of-leg	NFAT	kmer	0.5307	0.666448	0.135748
ENCFF347YCV	muscle-of-leg	E2A	kmer	0.403968	0.601334	0.197366
ENCFF347YCV	muscle-of-leg	NFAT	kmer	0.51951	0.667248	0.147738
ENCFF401SKP	muscle-of-leg	NFAT	kmer	0.531662	0.668202	0.13654
ENCFF470QNA	muscle-of-leg	NFAT	kmer	0.518762	0.611516	0.092754
ENCFF542RWT	muscle-of-leg	E2A	kmer	0.426296	0.619346	0.19305
ENCFF542RWT	muscle-of-leg	NFAT	kmer	0.520076	0.66951	0.149434
ENCFF572RTJ	muscle-of-leg	NFAT	kmer	0.531558	0.661196	0.129638
ENCFF579QTP	muscle-of-leg	NFAT	kmer	0.517722	0.62149	0.103768
ENCFF609KNI	muscle-of-leg	NFAT	kmer	0.525218	0.653192	0.127974
ENCFF630VNL	muscle-of-leg	NFAT	kmer	0.525434	0.605446	0.080012
ENCFF659BCP	muscle-of-leg	NFAT	kmer	0.547698	0.666168	0.11847
ENCFF674ZTX	muscle-of-leg	E2A	kmer	0.42341	0.602352	0.178942
ENCFF674ZTX	muscle-of-leg	ETS	kmer	0.595428	0.60858	0.013152
ENCFF674ZTX	muscle-of-leg	NFAT	kmer	0.52079	0.65145	0.13066
ENCFF448DSH	muscle-of-trunk	NFAT	kmer	0.530292	0.601548	0.071256
ENCFF562NMD	muscle-of-trunk	NFAT	kmer	0.510914	0.625154	0.11424
ENCFF836ETB	muscle-of-trunk	NFAT	kmer	0.487814	0.62189	0.134076
ENCFF704WQC	myotube	bZIP	kmer	0.55937	0.602588	0.043218
ENCFF704WQC	myotube	E2A	kmer	0.470818	0.614168	0.14335
ENCFF704WQC	myotube	TEA	kmer	0.540686	0.66417	0.123484
ENCFF854VIP	myotube	bZIP	kmer	0.550418	0.615352	0.064934
ENCFF854VIP	myotube	E2A	kmer	0.453708	0.64388	0.190172
ENCFF602XCK	naive-thymus-derived-CD4-positive_-alpha-beta-T-cell	FOX	kmer	0.52782	0.610176	0.082356
ENCFF602XCK	naive-thymus-derived-CD4-positive_-alpha-beta-T-cell	TALE_zfC2H2	kmer	0.52427	0.602138	0.077868
ENCFF710SFP	NAMALWA	E2A	kmer	0.422446	0.672678	0.250232
ENCFF878HVG	NAMALWA	E2A	kmer	0.443926	0.663406	0.21948
ENCFF840ZTK	natural-killer-cell	ETS	kmer	0.59222	0.639342	0.047122
ENCFF041CSB	NB4	CEBP	kmer	0.581152	0.653096	0.071944
ENCFF041CSB	NB4	ETSIII	kmer	0.528454	0.61384	0.085386
ENCFF925ZDU	NB4	CEBP	kmer	0.56716	0.640296	0.073136
ENCFF925ZDU	NB4	ETSIII	kmer	0.54663	0.612924	0.066294
ENCFF230SPN	neural-progenitor-cell	zfC2H2_RHD	kmer	0.530096	0.608428	0.078332
ENCFF687UQV	neural-stem-progenitor-cell	SOXC	kmer	0.494158	0.623674	0.129516
ENCFF687UQV	neural-stem-progenitor-cell	zfC2H2_RHD	kmer	0.53478	0.60643	0.07165
ENCFF105ETE	non-pigmented-ciliary-epithelial-cell	TEA	kmer	0.565886	0.63471	0.068824
ENCFF699EKS	non-pigmented-ciliary-epithelial-cell	TEA	kmer	0.551582	0.602158	0.050576
ENCFF366XFZ	NT2_D1	POU	kmer	0.545408	0.627072	0.081664
ENCFF366XFZ	NT2_D1	SOXC	kmer	0.523556	0.61755	0.093994
ENCFF366XFZ	NT2_D1	SOX	kmer	0.538126	0.604288	0.066162
ENCFF260PQV	OCI-LY7	E2A	kmer	0.42801	0.662894	0.234884
ENCFF260PQV	OCI-LY7	ETSIII	kmer	0.513006	0.614894	0.101888
ENCFF696LIK	OCI-LY7	E2A	kmer	0.452286	0.74663	0.294344
ENCFF914GVC	omental-fat-pad	EGR	kmer	0.567724	0.611692	0.043968
ENCFF498QOJ	ovary	E2F_zfC2H2	kmer	0.589788	0.610628	0.02084
ENCFF883WWT	ovary	FOX	kmer	0.490924	0.609886	0.118962
ENCFF367WMG	Panc1	NR2E	kmer	0.579014	0.608984	0.02997
ENCFF553OYG	Panc1	FOX	kmer	0.536004	0.605896	0.069892
ENCFF553OYG	Panc1	NR2E	kmer	0.583278	0.63806	0.054782
ENCFF735JRV	pancreas	E2A	kmer	0.428292	0.64209	0.213798
ENCFF897PRD	pancreas	E2A	kmer	0.440454	0.6318	0.191346
ENCFF897PRD	pancreas	FOX	kmer	0.511122	0.619758	0.108636
ENCFF040AJP	PC-9	NR2E	kmer	0.598218	0.604096	0.005878
ENCFF040AJP	PC-9	TEA	kmer	0.588218	0.604192	0.015974
ENCFF364RGE	PC-9	TEA	kmer	0.574956	0.615328	0.040372
ENCFF005DMK	placenta	AP2	kmer	0.477052	0.724556	0.247504
ENCFF005DMK	placenta	TEA	kmer	0.482104	0.628124	0.14602
ENCFF128BFZ	placenta	AP2	kmer	0.534748	0.737912	0.203164
ENCFF128BFZ	placenta	TEA	kmer	0.519816	0.646188	0.126372
ENCFF166VSZ	placenta	AP2	kmer	0.479254	0.740352	0.261098
ENCFF166VSZ	placenta	TEA	kmer	0.492922	0.64183	0.148908
ENCFF181GIN	placenta	AP2	kmer	0.46665	0.719808	0.253158
ENCFF181GIN	placenta	TEA	kmer	0.496072	0.622484	0.126412
ENCFF421EQO	placenta	AP2	kmer	0.486134	0.700786	0.214652
ENCFF421EQO	placenta	TEA	kmer	0.483888	0.621872	0.137984
ENCFF502POZ	placenta	AP2	kmer	0.43498	0.646568	0.211588
ENCFF502POZ	placenta	TEA	kmer	0.47362	0.646214	0.172594
ENCFF557HFW	placenta	AP2	kmer	0.478794	0.6362	0.157406
ENCFF557HFW	placenta	TEA	kmer	0.495518	0.690788	0.19527
ENCFF564VUG	placenta	AP2	kmer	0.422556	0.70859	0.286034
ENCFF564VUG	placenta	TEA	kmer	0.504114	0.652126	0.148012
ENCFF602BHS	placenta	AP2	kmer	0.558448	0.691684	0.133236
ENCFF602BHS	placenta	TEA	kmer	0.542716	0.651066	0.10835
ENCFF655ZJF	placenta	AP2	kmer	0.468654	0.750734	0.28208
ENCFF655ZJF	placenta	ZFX	kmer	0.545018	0.602076	0.057058
ENCFF880QTT	placenta	CEBP	kmer	0.540018	0.630904	0.090886
ENCFF880QTT	placenta	TEA	kmer	0.496972	0.60985	0.112878
ENCFF523BCF	psoas-muscle	bZIP	kmer	0.568324	0.627882	0.059558
ENCFF523BCF	psoas-muscle	NR2E	kmer	0.554958	0.61302	0.058062
ENCFF523BCF	psoas-muscle	TALE_zfC2H2	kmer	0.551044	0.61999	0.068946
ENCFF897JBO	pulmonary-artery-endothelial-cell	ETSIII	kmer	0.56265	0.604034	0.041384
ENCFF051UGM	renal-cortex-interstitium	zfC2H2_RHD	kmer	0.49315	0.603586	0.110436
ENCFF718CUQ	renal-cortex-interstitium	zfC2H2_RHD	kmer	0.524186	0.628052	0.103866
ENCFF659MOZ	renal-cortical-epithelial-cell	Hbox-III	kmer	0.552012	0.612716	0.060704
ENCFF012SAA	renal-pelvis	zfC2H2_RHD	kmer	0.49973	0.600802	0.101072
ENCFF386RDS	renal-pelvis	zfC2H2_RHD	kmer	0.546858	0.636436	0.089578
ENCFF407GRH	renal-pelvis	zfC2H2_RHD	kmer	0.554988	0.637268	0.08228
ENCFF535KCZ	renal-pelvis	zfC2H2_RHD	kmer	0.519704	0.625344	0.10564
ENCFF402DMO	retina	Hbox-III	kmer	0.497614	0.630904	0.13329
ENCFF402DMO	retina	Hbox-II	kmer	0.50351	0.611402	0.107892
ENCFF402DMO	retina	TALE_zfC2H2	kmer	0.493258	0.61184	0.118582
ENCFF679MSO	retina	Hbox-III	kmer	0.513382	0.673288	0.159906
ENCFF679MSO	retina	Hbox-II	kmer	0.50606	0.67502	0.16896
ENCFF679MSO	retina	TALE_zfC2H2	kmer	0.500516	0.60047	0.099954
ENCFF248RWN	retinal-pigment-epithelial-cell	PITX	kmer	0.59659	0.69457	0.09798
ENCFF248RWN	retinal-pigment-epithelial-cell	TEA	kmer	0.566708	0.615502	0.048794
ENCFF248RWN	retinal-pigment-epithelial-cell	TFE3	kmer	0.583248	0.614318	0.03107
ENCFF915CHV	retinal-pigment-epithelial-cell	TEA	kmer	0.56869	0.611284	0.042594
ENCFF915CHV	retinal-pigment-epithelial-cell	TFE3	kmer	0.556428	0.618092	0.061664
ENCFF216UBC	right-kidney	zfC2H2_RHD	kmer	0.534006	0.615576	0.08157
ENCFF254ICV	right-kidney	zfC2H2_RHD	kmer	0.488098	0.604716	0.116618
ENCFF046QJY	right-lung	E2A	kmer	0.448554	0.626544	0.17799
ENCFF136FZU	right-lung	E2A	kmer	0.422962	0.609308	0.186346
ENCFF223UWR	skeletal-muscle-myoblast	bZIP	kmer	0.593062	0.616216	0.023154
ENCFF223UWR	skeletal-muscle-myoblast	E2A	kmer	0.487366	0.623638	0.136272
ENCFF223UWR	skeletal-muscle-myoblast	TEA	kmer	0.58173	0.628772	0.047042
ENCFF962IGI	skeletal-muscle-myoblast	bZIP	kmer	0.588598	0.613286	0.024688
ENCFF962IGI	skeletal-muscle-myoblast	E2A	kmer	0.466952	0.614262	0.14731
ENCFF962IGI	skeletal-muscle-myoblast	TEA	kmer	0.580638	0.63453	0.053892
ENCFF600JNF	SK-MEL-5	SOXC	kmer	0.55348	0.615648	0.062168
ENCFF600JNF	SK-MEL-5	SOX	kmer	0.566084	0.602216	0.036132
ENCFF600JNF	SK-MEL-5	TFE3	kmer	0.597044	0.663508	0.066464
ENCFF862XVF	SK-MEL-5	SOXC	kmer	0.545514	0.630498	0.084984
ENCFF862XVF	SK-MEL-5	TFE3	kmer	0.58143	0.667696	0.086266
ENCFF768WKW	SK-N-DZ	GATA	kmer	0.517568	0.608784	0.091216
ENCFF768WKW	SK-N-DZ	Hbox-III	kmer	0.519508	0.64647	0.126962
ENCFF768WKW	SK-N-DZ	Hbox-II	kmer	0.540788	0.65647	0.115682
ENCFF865LCY	SK-N-DZ	GATA	kmer	0.539554	0.615564	0.07601
ENCFF865LCY	SK-N-DZ	Hbox-III	kmer	0.530734	0.64258	0.111846
ENCFF865LCY	SK-N-DZ	Hbox-II	kmer	0.55296	0.666956	0.113996
ENCFF192DXB	SK-N-MC	AP2	kmer	0.526206	0.611686	0.08548
ENCFF888JLF	SK-N-MC	AP2	kmer	0.558626	0.614596	0.05597
ENCFF063OCF	small-intestine	HNF4	kmer	0.490374	0.619114	0.12874
ENCFF321LTV	small-intestine	ESRR-II	kmer	0.521388	0.60551	0.084122
ENCFF321LTV	small-intestine	HNF4	kmer	0.502794	0.659134	0.15634
ENCFF442AYJ	small-intestine	HNF4	kmer	0.506044	0.617752	0.111708
ENCFF559HGO	small-intestine	HNF4	kmer	0.509634	0.623848	0.114214
ENCFF564SMU	small-intestine	HNF4	kmer	0.499368	0.630614	0.131246
ENCFF599BMR	small-intestine	HNF4	kmer	0.52603	0.621978	0.095948
ENCFF692AJW	small-intestine	HNF4	kmer	0.49042	0.604234	0.113814
ENCFF722CYJ	small-intestine	HNF4	kmer	0.501258	0.608938	0.10768
ENCFF751OEX	small-intestine	GATA	kmer	0.51406	0.601184	0.087124
ENCFF751OEX	small-intestine	HNF4	kmer	0.524248	0.622074	0.097826
ENCFF917YWY	small-intestine	HNF4	kmer	0.523466	0.606454	0.082988
ENCFF941FIK	small-intestine	HNF4	kmer	0.5029	0.623552	0.120652
ENCFF268UJI	smooth-muscle-cell-of-the-brain-vasculature	FOX	kmer	0.519138	0.6062	0.087062
ENCFF268UJI	smooth-muscle-cell-of-the-brain-vasculature	ZIC	kmer	0.469004	0.619622	0.150618
ENCFF788MXD	smooth-muscle-cell-of-the-brain-vasculature	FOX	kmer	0.503188	0.605558	0.10237
ENCFF788MXD	smooth-muscle-cell-of-the-brain-vasculature	ZIC	kmer	0.48059	0.604642	0.124052
ENCFF162HDT	spinal-cord	RFX	kmer	0.536202	0.621668	0.085466
ENCFF753RBC	spinal-cord	RFX	kmer	0.548438	0.625052	0.076614
ENCFF701IYS	stomach	ETS	kmer	0.588586	0.614708	0.026122
ENCFF701IYS	stomach	FOX	kmer	0.501902	0.626572	0.12467
ENCFF877XCF	stomach	E2F_zfC2H2	kmer	0.58334	0.602578	0.019238
ENCFF941HUI	stomach	FOX	kmer	0.50973	0.654812	0.145082
ENCFF941HUI	stomach	GATA	kmer	0.499772	0.61329	0.113518
ENCFF254WCU	stromal-cell-of-bone-marrow	NR2E	kmer	0.599114	0.6571	0.057986
ENCFF012QDX	T-helper-1-cell	FOX	kmer	0.497156	0.607912	0.110756
ENCFF654MRJ	T-helper-1-cell	FOX	kmer	0.516276	0.606248	0.089972
ENCFF144XMY	T-helper-2-cell	ETS	kmer	0.596532	0.740386	0.143854
ENCFF420UQF	T-helper-2-cell	ETS	kmer	0.589566	0.60276	0.013194
ENCFF061UBG	thymus	E2A	kmer	0.411022	0.67995	0.268928
ENCFF189LKP	thymus	E2A	kmer	0.415888	0.645046	0.229158
ENCFF601PAY	thymus	E2A	kmer	0.418804	0.623222	0.204418
ENCFF711IJR	thymus	E2A	kmer	0.421536	0.636844	0.215308
ENCFF711IJR	thymus	zfC2H2_RHD	kmer	0.510026	0.60643	0.096404
ENCFF880KWE	thymus	E2A	kmer	0.418574	0.625974	0.2074
ENCFF880KWE	thymus	zfC2H2_RHD	kmer	0.55347	0.63276	0.07929
ENCFF947RDC	thymus	E2A	kmer	0.41649	0.650714	0.234224
ENCFF959FMP	thymus	E2A	kmer	0.411782	0.628802	0.21702
ENCFF961JXL	thymus	E2A	kmer	0.440892	0.612476	0.171584
ENCFF984RKH	thymus	E2A	kmer	0.431974	0.683172	0.251198
ENCFF984RKH	thymus	zfC2H2_RHD	kmer	0.503274	0.608664	0.10539
ENCFF116OFN	thyroid-gland	NKX-II	kmer	0.505172	0.615968	0.110796
ENCFF116OFN	thyroid-gland	NKX	kmer	0.529112	0.601426	0.072314
ENCFF665WNI	thyroid-gland	HIC1	kmer	0.488512	0.62685	0.138338
ENCFF666SXY	thyroid-gland	HIC1	kmer	0.508518	0.6072	0.098682
ENCFF852FLF	thyroid-gland	HIC1	kmer	0.484396	0.632788	0.148392
ENCFF259KDP	tongue	E2A	kmer	0.4001	0.69872	0.29862
ENCFF814UZW	tongue	E2A	kmer	0.427578	0.662186	0.234608
ENCFF533MFM	trophoblast-cell	AP2	kmer	0.49167	0.787072	0.295402
ENCFF533MFM	trophoblast-cell	TEA	kmer	0.51573	0.611926	0.096196
ENCFF855CMV	trophoblast-cell	AP2	kmer	0.502416	0.760716	0.2583
ENCFF855CMV	trophoblast-cell	GCM	kmer	0.473204	0.665762	0.192558
ENCFF855CMV	trophoblast-cell	ZFX	kmer	0.52267	0.61446	0.09179
ENCFF941ZRQ	trophoblast-cell	AP2	kmer	0.534392	0.621536	0.087144
ENCFF941ZRQ	trophoblast-cell	MH1	kmer	0.542548	0.636432	0.093884
ENCFF941ZRQ	trophoblast-cell	TALE_zfC2H2	kmer	0.549366	0.61015	0.060784
ENCFF941ZRQ	trophoblast-cell	TEA	kmer	0.588964	0.66287	0.073906
ENCFF121XJN	upper-lobe-of-left-lung	NKX	kmer	0.54866	0.60178	0.05312
ENCFF040LTQ	WERI-Rb-1	E2A	kmer	0.471292	0.628442	0.15715
ENCFF040LTQ	WERI-Rb-1	PITX	kmer	0.588124	0.769666	0.181542
ENCFF362PAJ	WERI-Rb-1	E2A	kmer	0.564282	0.621728	0.057446
ENCFF362PAJ	WERI-Rb-1	Hbox-III	kmer	0.572334	0.615722	0.043388
ENCFF362PAJ	WERI-Rb-1	Hbox-II	kmer	0.569926	0.623014	0.053088
ENCFF314TNS	WI38	FOX	kmer	0.51432	0.64547	0.13115
ENCFF314TNS	WI38	NR2E	kmer	0.59118	0.620374	0.029194
ENCFF369ALL	WI38	FOX	kmer	0.531516	0.676406	0.14489
ENCFF369ALL	WI38	NR2E	kmer	0.576788	0.600538	0.02375
ENCFF582GQG	WI38	ETS	kmer	0.59797	0.60493	0.00696
ENCFF470VZX	A549	FOXA2_MM_PBM_M0729_1	pwm	0.535284	0.6243	0.089016
ENCFF470VZX	A549	FOXB1_HS_SELEX_M5438_1	pwm	0.502084	0.608686	0.106602
ENCFF470VZX	A549	HLF_HS_SELEX_M5516_1	pwm	0.558198	0.6048	0.046602
ENCFF475BVB	A549	FOXA2_MM_PBM_M0729_1	pwm	0.550128	0.619284	0.069156
ENCFF475BVB	A549	FOXB1_HS_SELEX_M5438_1	pwm	0.508574	0.60363	0.095056
ENCFF094AUJ	adrenal-gland	ESR2_HS_HOCOMOCO_M6219_1	pwm	0.424166	0.637232	0.213066
ENCFF094AUJ	adrenal-gland	JUND_HS_SELEX_M0320_1	pwm	0.56644	0.727914	0.161474
ENCFF094AUJ	adrenal-gland	THRA_HS_HOKOMOKO_M6521_1	pwm	0.437792	0.606852	0.16906
ENCFF215UXZ	adrenal-gland	ESR2_HS_HOCOMOCO_M6219_1	pwm	0.411036	0.62291	0.211874
ENCFF215UXZ	adrenal-gland	JUND_HS_SELEX_M0320_1	pwm	0.584106	0.696766	0.11266
ENCFF319ZSH	adrenal-gland	JUND_HS_SELEX_M0320_1	pwm	0.577276	0.645554	0.068278
ENCFF352HSZ	adrenal-gland	JUND_HS_SELEX_M0320_1	pwm	0.58838	0.635604	0.047224
ENCFF525FRH	adrenal-gland	JUND_HS_SELEX_M0320_1	pwm	0.584738	0.65802	0.073282
ENCFF829ZEZ	adrenal-gland	JUND_HS_SELEX_M0320_1	pwm	0.58571	0.655608	0.069898
ENCFF308QOO	AG04449	HLF_HS_SELEX_M5516_1	pwm	0.596136	0.61659	0.020454
ENCFF308QOO	AG04449	RUNX3_HS_SELEX_M5792_1	pwm	0.528736	0.628526	0.09979
ENCFF308QOO	AG04449	TEAD1_HS_SELEX_M5904_1	pwm	0.584172	0.688796	0.104624
ENCFF973CKA	AG04449	CEBPB_HS_SELEX_M5314_1	pwm	0.591782	0.602778	0.010996
ENCFF973CKA	AG04449	HLF_HS_SELEX_M5516_1	pwm	0.590858	0.626718	0.03586
ENCFF973CKA	AG04449	RUNX3_HS_SELEX_M5792_1	pwm	0.569034	0.622234	0.0532
ENCFF973CKA	AG04449	TEAD1_HS_SELEX_M5904_1	pwm	0.594504	0.685646	0.091142
ENCFF911OBG	AG04450	HLF_HS_SELEX_M5516_1	pwm	0.59304	0.608904	0.015864
ENCFF911OBG	AG04450	MYF6_MM_PBM_M0210_1	pwm	0.503642	0.608504	0.104862
ENCFF911OBG	AG04450	NEUROG2_HS_SELEX_M5653_1	pwm	0.485696	0.620042	0.134346
ENCFF911OBG	AG04450	TEAD1_HS_SELEX_M5904_1	pwm	0.544434	0.621192	0.076758
ENCFF991QFJ	AG04450	CEBPB_HS_SELEX_M5314_1	pwm	0.57801	0.601744	0.023734
ENCFF991QFJ	AG04450	HLF_HS_SELEX_M5516_1	pwm	0.575316	0.6041	0.028784
ENCFF991QFJ	AG04450	JUND_HS_SELEX_M0320_1	pwm	0.596776	0.636856	0.04008
ENCFF991QFJ	AG04450	MYF6_MM_PBM_M0210_1	pwm	0.505614	0.618064	0.11245
ENCFF991QFJ	AG04450	NEUROG2_HS_SELEX_M5653_1	pwm	0.498394	0.612226	0.113832
ENCFF991QFJ	AG04450	TEAD1_HS_SELEX_M5904_1	pwm	0.515152	0.625568	0.110416
ENCFF034CJK	AG09309	RUNX3_HS_SELEX_M5792_1	pwm	0.530792	0.640076	0.109284
ENCFF034CJK	AG09309	TEAD1_HS_SELEX_M5904_1	pwm	0.576864	0.623192	0.046328
ENCFF952FSO	AG09309	CEBPB_HS_SELEX_M5314_1	pwm	0.596004	0.634974	0.03897
ENCFF952FSO	AG09309	NFIX_HS_SELEX_M5665_1	pwm	0.592744	0.609692	0.016948
ENCFF952FSO	AG09309	RUNX3_HS_SELEX_M5792_1	pwm	0.53069	0.629436	0.098746
ENCFF952FSO	AG09309	TEAD1_HS_SELEX_M5904_1	pwm	0.571206	0.640756	0.06955
ENCFF413SVK	AG09319	CEBPB_HS_SELEX_M5314_1	pwm	0.5953	0.631108	0.035808
ENCFF413SVK	AG09319	HLF_HS_SELEX_M5516_1	pwm	0.585676	0.624128	0.038452
ENCFF413SVK	AG09319	NEUROG2_HS_SELEX_M5653_1	pwm	0.495814	0.60252	0.106706
ENCFF413SVK	AG09319	NFIX_HS_SELEX_M5665_1	pwm	0.591554	0.630522	0.038968
ENCFF507FBF	AG09319	JUND_HS_SELEX_M0320_1	pwm	0.5836	0.603676	0.020076
ENCFF507FBF	AG09319	NEUROG2_HS_SELEX_M5653_1	pwm	0.493278	0.601648	0.10837
ENCFF507FBF	AG09319	NFIX_HS_SELEX_M5665_1	pwm	0.588582	0.611956	0.023374
ENCFF062LRW	AG10803	CEBPB_HS_SELEX_M5314_1	pwm	0.59082	0.644912	0.054092
ENCFF062LRW	AG10803	HLF_HS_SELEX_M5516_1	pwm	0.582188	0.62728	0.045092
ENCFF062LRW	AG10803	NEUROG2_HS_SELEX_M5653_1	pwm	0.526694	0.612276	0.085582
ENCFF062LRW	AG10803	NFIX_HS_SELEX_M5665_1	pwm	0.556102	0.622956	0.066854
ENCFF062LRW	AG10803	RUNX3_HS_SELEX_M5792_1	pwm	0.527004	0.626064	0.09906
ENCFF062LRW	AG10803	TEAD1_HS_SELEX_M5904_1	pwm	0.574808	0.658072	0.083264
ENCFF964MRO	AG10803	CEBPB_HS_SELEX_M5314_1	pwm	0.581	0.635398	0.054398
ENCFF964MRO	AG10803	HLF_HS_SELEX_M5516_1	pwm	0.5783	0.62652	0.04822
ENCFF964MRO	AG10803	JUND_HS_SELEX_M0320_1	pwm	0.59337	0.622446	0.029076
ENCFF964MRO	AG10803	NEUROG2_HS_SELEX_M5653_1	pwm	0.531526	0.618392	0.086866
ENCFF964MRO	AG10803	NFIX_HS_SELEX_M5665_1	pwm	0.59342	0.633244	0.039824
ENCFF964MRO	AG10803	RUNX3_HS_SELEX_M5792_1	pwm	0.5243	0.621052	0.096752
ENCFF964MRO	AG10803	TEAD1_HS_SELEX_M5904_1	pwm	0.57308	0.669008	0.095928
ENCFF316LBU	amniotic-epithelial-cell	GATA6_MM_PBM_M0782_1	pwm	0.59663	0.644396	0.047766
ENCFF316LBU	amniotic-epithelial-cell	RUNX3_HS_SELEX_M5792_1	pwm	0.564602	0.656324	0.091722
ENCFF316LBU	amniotic-epithelial-cell	TEAD1_HS_SELEX_M5904_1	pwm	0.566378	0.610982	0.044604
ENCFF727SDN	amniotic-epithelial-cell	CEBPB_HS_SELEX_M5314_1	pwm	0.583298	0.661002	0.077704
ENCFF727SDN	amniotic-epithelial-cell	RUNX3_HS_SELEX_M5792_1	pwm	0.544404	0.63052	0.086116
ENCFF603RPR	ascending-aorta	NFIX_HS_SELEX_M5665_1	pwm	0.580128	0.672204	0.092076
ENCFF803JHO	astrocyte	RUNX3_HS_SELEX_M5792_1	pwm	0.590366	0.720838	0.130472
ENCFF803JHO	astrocyte	TEAD1_HS_SELEX_M5904_1	pwm	0.568572	0.63732	0.068748
ENCFF057PEY	astrocyte-of-the-cerebellum	NFIX_HS_SELEX_M5665_1	pwm	0.576186	0.658696	0.08251
ENCFF057PEY	astrocyte-of-the-cerebellum	RUNX3_HS_SELEX_M5792_1	pwm	0.519748	0.742244	0.222496
ENCFF057PEY	astrocyte-of-the-cerebellum	TEAD1_HS_SELEX_M5904_1	pwm	0.553608	0.63764	0.084032
ENCFF819ZIM	astrocyte-of-the-cerebellum	RUNX3_HS_SELEX_M5792_1	pwm	0.579122	0.73732	0.158198
ENCFF819ZIM	astrocyte-of-the-cerebellum	TEAD1_HS_SELEX_M5904_1	pwm	0.599534	0.641982	0.042448
ENCFF662JPI	astrocyte-of-the-hippocampus	RUNX3_HS_SELEX_M5792_1	pwm	0.502504	0.669944	0.16744
ENCFF662JPI	astrocyte-of-the-hippocampus	TEAD1_HS_SELEX_M5904_1	pwm	0.553646	0.660146	0.1065
ENCFF698ZFJ	astrocyte-of-the-hippocampus	JUND_HS_SELEX_M0320_1	pwm	0.566536	0.612108	0.045572
ENCFF698ZFJ	astrocyte-of-the-hippocampus	NFIX_HS_SELEX_M5665_1	pwm	0.580652	0.6586	0.077948
ENCFF698ZFJ	astrocyte-of-the-hippocampus	RUNX3_HS_SELEX_M5792_1	pwm	0.456358	0.664006	0.207648
ENCFF698ZFJ	astrocyte-of-the-hippocampus	TEAD1_HS_SELEX_M5904_1	pwm	0.499946	0.631726	0.13178
ENCFF452BSD	astrocyte-of-the-spinal-cord	RUNX3_HS_SELEX_M5792_1	pwm	0.533886	0.665176	0.13129
ENCFF674LBB	astrocyte-of-the-spinal-cord	RUNX3_HS_SELEX_M5792_1	pwm	0.473388	0.68412	0.210732
ENCFF159HJV	B-cell	ELF1_HS_SELEX_M5373_1	pwm	0.58392	0.653224	0.069304
ENCFF159HJV	B-cell	FLI1_HS_SELEX_M5431_1	pwm	0.592642	0.690944	0.098302
ENCFF159HJV	B-cell	PRDM1_HS_SELEX_M5749_1	pwm	0.534436	0.61352	0.079084
ENCFF159HJV	B-cell	RUNX3_HS_SELEX_M5792_1	pwm	0.476964	0.624674	0.14771
ENCFF159HJV	B-cell	SFPI1_HS_SELEX_M5863_1	pwm	0.542188	0.648642	0.106454
ENCFF263YRO	B-cell	ELF1_HS_SELEX_M5373_1	pwm	0.58114	0.629586	0.048446
ENCFF263YRO	B-cell	RUNX3_HS_SELEX_M5792_1	pwm	0.487314	0.60389	0.116576
ENCFF263YRO	B-cell	SFPI1_HS_SELEX_M5863_1	pwm	0.525684	0.619856	0.094172
ENCFF403PJS	B-cell	ELF1_HS_SELEX_M5373_1	pwm	0.597544	0.640302	0.042758
ENCFF403PJS	B-cell	FLI1_HS_SELEX_M5431_1	pwm	0.595926	0.6812	0.085274
ENCFF403PJS	B-cell	PRDM1_HS_SELEX_M5749_1	pwm	0.5262	0.60014	0.07394
ENCFF403PJS	B-cell	RUNX3_HS_SELEX_M5792_1	pwm	0.497774	0.618464	0.12069
ENCFF403PJS	B-cell	SFPI1_HS_SELEX_M5863_1	pwm	0.538552	0.620036	0.081484
ENCFF581UTE	B-cell	ELF1_HS_SELEX_M5373_1	pwm	0.541748	0.610868	0.06912
ENCFF581UTE	B-cell	FLI1_HS_SELEX_M5431_1	pwm	0.560238	0.640248	0.08001
ENCFF581UTE	B-cell	HINFP_HS_SELEX_M5513_1	pwm	0.524034	0.602822	0.078788
ENCFF581UTE	B-cell	ZNF202_MM_PBM_M0404_1	pwm	0.569564	0.618648	0.049084
ENCFF147CSC	BE2C	NEUROG2_HS_SELEX_M5653_1	pwm	0.551976	0.626578	0.074602
ENCFF147CSC	BE2C	NFIX_HS_SELEX_M5665_1	pwm	0.572082	0.621988	0.049906
ENCFF147CSC	BE2C	VENTXselex_HS_SELEX_M5947_1	pwm	0.54751	0.623424	0.075914
ENCFF954RNY	BE2C	NEUROG2_HS_SELEX_M5653_1	pwm	0.527208	0.623278	0.09607
ENCFF954RNY	BE2C	PHOX2B_HS_SELEX_M5715_1	pwm	0.592032	0.64072	0.048688
ENCFF954RNY	BE2C	VENTXselex_HS_SELEX_M5947_1	pwm	0.548792	0.636362	0.08757
ENCFF524XCQ	bipolar-neuron	EBF1_HS_SELEX_M5364_1	pwm	0.51498	0.664892	0.149912
ENCFF524XCQ	bipolar-neuron	MEIS2_MM_PBM_M0965_1	pwm	0.535968	0.617724	0.081756
ENCFF524XCQ	bipolar-neuron	MYF6_MM_PBM_M0210_1	pwm	0.464708	0.656956	0.192248
ENCFF524XCQ	bipolar-neuron	NEUROG2_HS_SELEX_M5653_1	pwm	0.478682	0.695084	0.216402
ENCFF524XCQ	bipolar-neuron	OLIG1_HS_SELEX_M5690_1	pwm	0.50128	0.666848	0.165568
ENCFF524XCQ	bipolar-neuron	TCF3_HS_SELEX_M5900_1	pwm	0.357176	0.606382	0.249206
ENCFF950DMO	bipolar-neuron	EBF1_HS_SELEX_M5364_1	pwm	0.519576	0.668444	0.148868
ENCFF950DMO	bipolar-neuron	MEIS2_MM_PBM_M0965_1	pwm	0.538396	0.618864	0.080468
ENCFF950DMO	bipolar-neuron	MYF6_MM_PBM_M0210_1	pwm	0.484746	0.654904	0.170158
ENCFF950DMO	bipolar-neuron	NEUROG2_HS_SELEX_M5653_1	pwm	0.465046	0.693052	0.228006
ENCFF950DMO	bipolar-neuron	OLIG1_HS_SELEX_M5690_1	pwm	0.491574	0.663994	0.17242
ENCFF169SUG	BJ	TEAD1_HS_SELEX_M5904_1	pwm	0.592746	0.65169	0.058944
ENCFF824OPX	BJ	TEAD1_HS_SELEX_M5904_1	pwm	0.548582	0.60298	0.054398
ENCFF706BCL	body-of-pancreas	ID4_HS_SELEX_M5571_1	pwm	0.451336	0.673704	0.222368
ENCFF706BCL	body-of-pancreas	MESP1_HS_SELEX_M5627_1	pwm	0.432346	0.637456	0.20511
ENCFF706BCL	body-of-pancreas	NFIX_HS_SELEX_M5665_1	pwm	0.582734	0.716918	0.134184
ENCFF706BCL	body-of-pancreas	SNAI2_HS_SELEX_M5809_1	pwm	0.483948	0.624056	0.140108
ENCFF706BCL	body-of-pancreas	TCF3_HS_SELEX_M5900_1	pwm	0.415696	0.67216	0.256464
ENCFF103UPI	brain	MEIS2_MM_PBM_M0965_1	pwm	0.539116	0.610292	0.071176
ENCFF103UPI	brain	MYF6_MM_PBM_M0210_1	pwm	0.465868	0.609182	0.143314
ENCFF103UPI	brain	NEUROG2_HS_SELEX_M5653_1	pwm	0.484014	0.678382	0.194368
ENCFF103UPI	brain	NFIA_HS_SELEX_M5661_1	pwm	0.506362	0.622312	0.11595
ENCFF103UPI	brain	NFIX_HS_SELEX_M5665_1	pwm	0.57076	0.731706	0.160946
ENCFF103UPI	brain	OLIG1_HS_SELEX_M5690_1	pwm	0.475638	0.677956	0.202318
ENCFF103UPI	brain	RFX4primary_MM_PBM	pwm	0.546656	0.62348	0.076824
ENCFF103UPI	brain	TWIST2_MM_PBM_M0177_1	pwm	0.531746	0.613874	0.082128
ENCFF207IYJ	brain	NFIX_HS_SELEX_M5665_1	pwm	0.554848	0.67435	0.119502
ENCFF207IYJ	brain	RFX4primary_MM_PBM	pwm	0.499344	0.687196	0.187852
ENCFF218ZFS	brain	RFX4primary_MM_PBM	pwm	0.5335	0.705592	0.172092
ENCFF218ZFS	brain	RFX4secondary_MM_PBM	pwm	0.508236	0.603902	0.095666
ENCFF230WCV	brain	HIC2_HS_SELEX_M5512_1	pwm	0.446296	0.6104	0.164104
ENCFF230WCV	brain	MEIS2_MM_PBM_M0965_1	pwm	0.543094	0.612234	0.06914
ENCFF230WCV	brain	MYF6_MM_PBM_M0210_1	pwm	0.479976	0.63516	0.155184
ENCFF230WCV	brain	NEUROG2_HS_SELEX_M5653_1	pwm	0.488462	0.744326	0.255864
ENCFF230WCV	brain	NFIA_HS_SELEX_M5661_1	pwm	0.514494	0.648348	0.133854
ENCFF230WCV	brain	NFIX_HS_SELEX_M5665_1	pwm	0.588206	0.760114	0.171908
ENCFF230WCV	brain	OLIG1_HS_SELEX_M5690_1	pwm	0.500924	0.738674	0.23775
ENCFF230WCV	brain	RFX4primary_MM_PBM	pwm	0.560648	0.612296	0.051648
ENCFF230WCV	brain	TWIST2_MM_PBM_M0177_1	pwm	0.510908	0.659572	0.148664
ENCFF303THQ	brain	RFX4primary_MM_PBM	pwm	0.5386	0.71347	0.17487
ENCFF303THQ	brain	RFX4secondary_MM_PBM	pwm	0.510544	0.605154	0.09461
ENCFF322ZNH	brain	MEIS2_MM_PBM_M0965_1	pwm	0.560456	0.629264	0.068808
ENCFF322ZNH	brain	NFIX_HS_SELEX_M5665_1	pwm	0.582938	0.692172	0.109234
ENCFF322ZNH	brain	RFX4primary_MM_PBM	pwm	0.585756	0.674176	0.08842
ENCFF331KXA	brain	RFX4primary_MM_PBM	pwm	0.51794	0.679724	0.161784
ENCFF375XEP	brain	HIC2_HS_SELEX_M5512_1	pwm	0.434748	0.626274	0.191526
ENCFF375XEP	brain	MEIS2_MM_PBM_M0965_1	pwm	0.544488	0.621678	0.07719
ENCFF375XEP	brain	MYF6_MM_PBM_M0210_1	pwm	0.491394	0.634562	0.143168
ENCFF375XEP	brain	NEUROG2_HS_SELEX_M5653_1	pwm	0.47808	0.731914	0.253834
ENCFF375XEP	brain	NFIA_HS_SELEX_M5661_1	pwm	0.528974	0.689982	0.161008
ENCFF375XEP	brain	NFIX_HS_SELEX_M5665_1	pwm	0.59444	0.79276	0.19832
ENCFF375XEP	brain	OLIG1_HS_SELEX_M5690_1	pwm	0.50298	0.710742	0.207762
ENCFF375XEP	brain	RFX4primary_MM_PBM	pwm	0.562396	0.635728	0.073332
ENCFF375XEP	brain	TWIST2_MM_PBM_M0177_1	pwm	0.502296	0.648632	0.146336
ENCFF457XYZ	brain	MEIS2_MM_PBM_M0965_1	pwm	0.518668	0.617582	0.098914
ENCFF457XYZ	brain	NEUROG2_HS_SELEX_M5653_1	pwm	0.448614	0.610624	0.16201
ENCFF457XYZ	brain	NFIA_HS_SELEX_M5661_1	pwm	0.510464	0.638446	0.127982
ENCFF457XYZ	brain	NFIX_HS_SELEX_M5665_1	pwm	0.582464	0.74157	0.159106
ENCFF457XYZ	brain	OLIG1_HS_SELEX_M5690_1	pwm	0.47776	0.603708	0.125948
ENCFF528GDM	brain	MAFB_MM_PBM_M0321_1	pwm	0.466376	0.60169	0.135314
ENCFF528GDM	brain	MEIS2_MM_PBM_M0965_1	pwm	0.540822	0.64536	0.104538
ENCFF528GDM	brain	MYF6_MM_PBM_M0210_1	pwm	0.49196	0.62182	0.12986
ENCFF528GDM	brain	NEUROG2_HS_SELEX_M5653_1	pwm	0.506714	0.761556	0.254842
ENCFF528GDM	brain	NFIA_HS_SELEX_M5661_1	pwm	0.526546	0.648854	0.122308
ENCFF528GDM	brain	NFIX_HS_SELEX_M5665_1	pwm	0.587744	0.747622	0.159878
ENCFF528GDM	brain	OLIG1_HS_SELEX_M5690_1	pwm	0.514382	0.73979	0.225408
ENCFF528GDM	brain	TWIST2_MM_PBM_M0177_1	pwm	0.539192	0.665948	0.126756
ENCFF530CGM	brain	MEIS2_MM_PBM_M0965_1	pwm	0.532376	0.630662	0.098286
ENCFF530CGM	brain	NEUROG2_HS_SELEX_M5653_1	pwm	0.468502	0.675836	0.207334
ENCFF530CGM	brain	NFIA_HS_SELEX_M5661_1	pwm	0.505666	0.662402	0.156736
ENCFF530CGM	brain	NFIX_HS_SELEX_M5665_1	pwm	0.567184	0.768884	0.2017
ENCFF530CGM	brain	OLIG1_HS_SELEX_M5690_1	pwm	0.486878	0.65506	0.168182
ENCFF530CGM	brain	RFX4primary_MM_PBM	pwm	0.516886	0.63296	0.116074
ENCFF530CGM	brain	TWIST2_MM_PBM_M0177_1	pwm	0.478556	0.604294	0.125738
ENCFF560YBU	brain	MEIS2_MM_PBM_M0965_1	pwm	0.524814	0.633804	0.10899
ENCFF560YBU	brain	MYF6_MM_PBM_M0210_1	pwm	0.478676	0.615948	0.137272
ENCFF560YBU	brain	NEUROG2_HS_SELEX_M5653_1	pwm	0.479952	0.736352	0.2564
ENCFF560YBU	brain	NFIA_HS_SELEX_M5661_1	pwm	0.51471	0.670534	0.155824
ENCFF560YBU	brain	OLIG1_HS_SELEX_M5690_1	pwm	0.49672	0.717452	0.220732
ENCFF560YBU	brain	TWIST2_MM_PBM_M0177_1	pwm	0.496258	0.642874	0.146616
ENCFF722OVO	brain	NEUROG2_HS_SELEX_M5653_1	pwm	0.498674	0.616422	0.117748
ENCFF722OVO	brain	NFIA_HS_SELEX_M5661_1	pwm	0.507808	0.602864	0.095056
ENCFF722OVO	brain	NFIX_HS_SELEX_M5665_1	pwm	0.551494	0.708536	0.157042
ENCFF722OVO	brain	OLIG1_HS_SELEX_M5690_1	pwm	0.498892	0.618186	0.119294
ENCFF722OVO	brain	RFX4primary_MM_PBM	pwm	0.573824	0.650386	0.076562
ENCFF904HGV	brain	NFIX_HS_SELEX_M5665_1	pwm	0.543458	0.607628	0.06417
ENCFF904HGV	brain	RFX4primary_MM_PBM	pwm	0.5208	0.638368	0.117568
ENCFF224NMM	brain-microvascular-endothelial-cell	RUNX3_HS_SELEX_M5792_1	pwm	0.55846	0.68482	0.12636
ENCFF833HUK	brain-microvascular-endothelial-cell	HLF_HS_SELEX_M5516_1	pwm	0.593624	0.607764	0.01414
ENCFF833HUK	brain-microvascular-endothelial-cell	RUNX3_HS_SELEX_M5792_1	pwm	0.570202	0.684804	0.114602
ENCFF972QQK	brain-pericyte	JUND_HS_SELEX_M0320_1	pwm	0.592266	0.602314	0.010048
ENCFF972QQK	brain-pericyte	MAFB_MM_PBM_M0321_1	pwm	0.471032	0.606524	0.135492
ENCFF972QQK	brain-pericyte	ZIC1_HS_SELEX_M5963_1	pwm	0.478744	0.637528	0.158784
ENCFF338GII	bronchial-epithelial-cell	GRHL1_HS_SELEX_M5498_1	pwm	0.584324	0.62117	0.036846
ENCFF338GII	bronchial-epithelial-cell	P53_HS_SELEX_M6105_1	pwm	0.597386	0.726038	0.128652
ENCFF338GII	bronchial-epithelial-cell	SNAI2_HS_SELEX_M5809_1	pwm	0.523034	0.607366	0.084332
ENCFF552CWN	bronchial-epithelial-cell	GRHL1_HS_SELEX_M5498_1	pwm	0.53097	0.601814	0.070844
ENCFF552CWN	bronchial-epithelial-cell	P53_HS_SELEX_M6105_1	pwm	0.536166	0.664184	0.128018
ENCFF661YBX	bronchial-epithelial-cell	GATA6_MM_PBM_M0782_1	pwm	0.580802	0.604082	0.02328
ENCFF661YBX	bronchial-epithelial-cell	JUND_HS_SELEX_M0320_1	pwm	0.58539	0.63016	0.04477
ENCFF661YBX	bronchial-epithelial-cell	P53_HS_SELEX_M6105_1	pwm	0.517816	0.625184	0.107368
ENCFF541GPX	Caco-2	TFAP2A_HS_SELEX_M5912_1	pwm	0.515532	0.612152	0.09662
ENCFF541GPX	Caco-2	ZNF202_MM_PBM_M0404_1	pwm	0.525822	0.631054	0.105232
ENCFF929UQL	Caco-2	ZNF202_MM_PBM_M0404_1	pwm	0.55145	0.628066	0.076616
ENCFF092IXN	cardiac-fibroblast	CEBPB_HS_SELEX_M5314_1	pwm	0.590446	0.627434	0.036988
ENCFF092IXN	cardiac-fibroblast	HLF_HS_SELEX_M5516_1	pwm	0.585832	0.62274	0.036908
ENCFF092IXN	cardiac-fibroblast	JUND_HS_SELEX_M0320_1	pwm	0.584564	0.604794	0.02023
ENCFF092IXN	cardiac-fibroblast	NFIX_HS_SELEX_M5665_1	pwm	0.586716	0.671534	0.084818
ENCFF528ZJQ	cardiac-fibroblast	FLI1_HS_SELEX_M5431_1	pwm	0.564056	0.602812	0.038756
ENCFF957GSL	cardiac-fibroblast	CEBPB_HS_SELEX_M5314_1	pwm	0.576572	0.621976	0.045404
ENCFF957GSL	cardiac-fibroblast	FLI1_HS_SELEX_M5431_1	pwm	0.546818	0.604604	0.057786
ENCFF957GSL	cardiac-fibroblast	HLF_HS_SELEX_M5516_1	pwm	0.569402	0.61165	0.042248
ENCFF957GSL	cardiac-fibroblast	NFIX_HS_SELEX_M5665_1	pwm	0.58894	0.67272	0.08378
ENCFF957GSL	cardiac-fibroblast	TEAD1_HS_SELEX_M5904_1	pwm	0.519346	0.612164	0.092818
ENCFF097RTD	cardiac-muscle-cell	GATA6_MM_PBM_M0782_1	pwm	0.595948	0.651604	0.055656
ENCFF097RTD	cardiac-muscle-cell	ISL2_HS_SELEX_M5583_1	pwm	0.56692	0.602898	0.035978
ENCFF097RTD	cardiac-muscle-cell	MEIS2_MM_PBM_M0965_1	pwm	0.582154	0.698754	0.1166
ENCFF156RTG	cardiac-muscle-cell	CEBPB_HS_SELEX_M5314_1	pwm	0.591718	0.642374	0.050656
ENCFF156RTG	cardiac-muscle-cell	HLF_HS_SELEX_M5516_1	pwm	0.591456	0.629416	0.03796
ENCFF156RTG	cardiac-muscle-cell	NFIX_HS_SELEX_M5665_1	pwm	0.59068	0.628884	0.038204
ENCFF156RTG	cardiac-muscle-cell	TEAD1_HS_SELEX_M5904_1	pwm	0.534868	0.617782	0.082914
ENCFF664DCZ	cardiac-muscle-cell	GATA6_MM_PBM_M0782_1	pwm	0.57873	0.651594	0.072864
ENCFF664DCZ	cardiac-muscle-cell	MEIS2_MM_PBM_M0965_1	pwm	0.553792	0.687688	0.133896
ENCFF862ZMZ	cardiac-muscle-cell	CEBPB_HS_SELEX_M5314_1	pwm	0.593618	0.666876	0.073258
ENCFF862ZMZ	cardiac-muscle-cell	HLF_HS_SELEX_M5516_1	pwm	0.599212	0.651956	0.052744
ENCFF862ZMZ	cardiac-muscle-cell	NFIX_HS_SELEX_M5665_1	pwm	0.57867	0.63013	0.05146
ENCFF862ZMZ	cardiac-muscle-cell	TEAD1_HS_SELEX_M5904_1	pwm	0.508816	0.610812	0.101996
ENCFF090WJW	cardiovascular-progenitor-cell	GATA6_MM_PBM_M0782_1	pwm	0.57738	0.665186	0.087806
ENCFF090WJW	cardiovascular-progenitor-cell	TEAD1_HS_SELEX_M5904_1	pwm	0.511244	0.607498	0.096254
ENCFF836DBU	cardiovascular-progenitor-cell	GATA6_MM_PBM_M0782_1	pwm	0.579044	0.74316	0.164116
ENCFF836DBU	cardiovascular-progenitor-cell	ZIC1_HS_SELEX_M5963_1	pwm	0.498848	0.641848	0.143
ENCFF063IUG	CD14-positive-monocyte	ELF1_HS_SELEX_M5373_1	pwm	0.583156	0.631702	0.048546
ENCFF063IUG	CD14-positive-monocyte	SFPI1_HS_SELEX_M5863_1	pwm	0.551016	0.648966	0.09795
ENCFF289XSM	CD14-positive-monocyte	ELF1_HS_SELEX_M5373_1	pwm	0.578258	0.649808	0.07155
ENCFF289XSM	CD14-positive-monocyte	FLI1_HS_SELEX_M5431_1	pwm	0.589058	0.721016	0.131958
ENCFF289XSM	CD14-positive-monocyte	MEIS2_MM_PBM_M0965_1	pwm	0.588278	0.60837	0.020092
ENCFF289XSM	CD14-positive-monocyte	RUNX3_HS_SELEX_M5792_1	pwm	0.47667	0.603392	0.126722
ENCFF289XSM	CD14-positive-monocyte	SFPI1_HS_SELEX_M5863_1	pwm	0.53311	0.667778	0.134668
ENCFF424GPY	CD14-positive-monocyte	SFPI1_HS_SELEX_M5863_1	pwm	0.561948	0.66552	0.103572
ENCFF096NVD	CD1c-positive-myeloid-dendritic-cell	ELF1_HS_SELEX_M5373_1	pwm	0.585578	0.615472	0.029894
ENCFF267VKD	CD1c-positive-myeloid-dendritic-cell	ELF1_HS_SELEX_M5373_1	pwm	0.58316	0.639838	0.056678
ENCFF267VKD	CD1c-positive-myeloid-dendritic-cell	FLI1_HS_SELEX_M5431_1	pwm	0.59836	0.70035	0.10199
ENCFF267VKD	CD1c-positive-myeloid-dendritic-cell	JUND_HS_SELEX_M0320_1	pwm	0.593706	0.600556	0.00685
ENCFF267VKD	CD1c-positive-myeloid-dendritic-cell	PRDM1_HS_SELEX_M5749_1	pwm	0.530616	0.6258	0.095184
ENCFF267VKD	CD1c-positive-myeloid-dendritic-cell	SFPI1_HS_SELEX_M5863_1	pwm	0.53008	0.66552	0.13544
ENCFF023ZMS	CD4-positive_-alpha-beta-T-cell	ELF1_HS_SELEX_M5373_1	pwm	0.56749	0.657696	0.090206
ENCFF023ZMS	CD4-positive_-alpha-beta-T-cell	FLI1_HS_SELEX_M5431_1	pwm	0.572102	0.705108	0.133006
ENCFF023ZMS	CD4-positive_-alpha-beta-T-cell	RUNX3_HS_SELEX_M5792_1	pwm	0.47819	0.685376	0.207186
ENCFF109RSW	CD4-positive_-alpha-beta-T-cell	ELF1_HS_SELEX_M5373_1	pwm	0.589362	0.661486	0.072124
ENCFF109RSW	CD4-positive_-alpha-beta-T-cell	MEIS2_MM_PBM_M0965_1	pwm	0.521916	0.602646	0.08073
ENCFF109RSW	CD4-positive_-alpha-beta-T-cell	RUNX3_HS_SELEX_M5792_1	pwm	0.46974	0.671054	0.201314
ENCFF191WFG	CD4-positive_-alpha-beta-T-cell	ELF1_HS_SELEX_M5373_1	pwm	0.569358	0.683828	0.11447
ENCFF191WFG	CD4-positive_-alpha-beta-T-cell	FLI1_HS_SELEX_M5431_1	pwm	0.59089	0.7331	0.14221
ENCFF191WFG	CD4-positive_-alpha-beta-T-cell	RUNX3_HS_SELEX_M5792_1	pwm	0.488858	0.688012	0.199154
ENCFF338UFC	CD4-positive_-alpha-beta-T-cell	ELF1_HS_SELEX_M5373_1	pwm	0.561204	0.627964	0.06676
ENCFF338UFC	CD4-positive_-alpha-beta-T-cell	MEIS2_MM_PBM_M0965_1	pwm	0.522622	0.602948	0.080326
ENCFF338UFC	CD4-positive_-alpha-beta-T-cell	RUNX3_HS_SELEX_M5792_1	pwm	0.515934	0.6908	0.174866
ENCFF703UHS	CD4-positive_-alpha-beta-T-cell	ELF1_HS_SELEX_M5373_1	pwm	0.568236	0.643724	0.075488
ENCFF703UHS	CD4-positive_-alpha-beta-T-cell	FLI1_HS_SELEX_M5431_1	pwm	0.566906	0.68719	0.120284
ENCFF703UHS	CD4-positive_-alpha-beta-T-cell	RUNX3_HS_SELEX_M5792_1	pwm	0.494856	0.644888	0.150032
ENCFF109VIJ	CD8-positive_-alpha-beta-T-cell	RUNX3_HS_SELEX_M5792_1	pwm	0.52096	0.724758	0.203798
ENCFF512IML	CD8-positive_-alpha-beta-T-cell	ELF1_HS_SELEX_M5373_1	pwm	0.565346	0.662892	0.097546
ENCFF512IML	CD8-positive_-alpha-beta-T-cell	FLI1_HS_SELEX_M5431_1	pwm	0.562254	0.706264	0.14401
ENCFF512IML	CD8-positive_-alpha-beta-T-cell	RUNX3_HS_SELEX_M5792_1	pwm	0.480856	0.6821	0.201244
ENCFF566SXQ	CD8-positive_-alpha-beta-T-cell	ELF1_HS_SELEX_M5373_1	pwm	0.573328	0.6584	0.085072
ENCFF566SXQ	CD8-positive_-alpha-beta-T-cell	RUNX3_HS_SELEX_M5792_1	pwm	0.471176	0.645552	0.174376
ENCFF663INK	CD8-positive_-alpha-beta-T-cell	ELF1_HS_SELEX_M5373_1	pwm	0.578342	0.687264	0.108922
ENCFF663INK	CD8-positive_-alpha-beta-T-cell	FLI1_HS_SELEX_M5431_1	pwm	0.585014	0.741308	0.156294
ENCFF663INK	CD8-positive_-alpha-beta-T-cell	MEIS2_MM_PBM_M0965_1	pwm	0.532698	0.615902	0.083204
ENCFF663INK	CD8-positive_-alpha-beta-T-cell	RUNX3_HS_SELEX_M5792_1	pwm	0.49365	0.716696	0.223046
ENCFF926OPP	CD8-positive_-alpha-beta-T-cell	ELF1_HS_SELEX_M5373_1	pwm	0.582744	0.6616	0.078856
ENCFF926OPP	CD8-positive_-alpha-beta-T-cell	FLI1_HS_SELEX_M5431_1	pwm	0.597172	0.698566	0.101394
ENCFF926OPP	CD8-positive_-alpha-beta-T-cell	RUNX3_HS_SELEX_M5792_1	pwm	0.501942	0.678726	0.176784
ENCFF512IPA	choroid-plexus-epithelial-cell	CEBPB_HS_SELEX_M5314_1	pwm	0.589512	0.607278	0.017766
ENCFF512IPA	choroid-plexus-epithelial-cell	HLF_HS_SELEX_M5516_1	pwm	0.590642	0.62128	0.030638
ENCFF512IPA	choroid-plexus-epithelial-cell	JUND_HS_SELEX_M0320_1	pwm	0.583734	0.647892	0.064158
ENCFF512IPA	choroid-plexus-epithelial-cell	RUNX3_HS_SELEX_M5792_1	pwm	0.491446	0.603528	0.112082
ENCFF512IPA	choroid-plexus-epithelial-cell	TEAD1_HS_SELEX_M5904_1	pwm	0.520818	0.602446	0.081628
ENCFF719FXT	choroid-plexus-epithelial-cell	CEBPB_HS_SELEX_M5314_1	pwm	0.58572	0.61968	0.03396
ENCFF719FXT	choroid-plexus-epithelial-cell	HLF_HS_SELEX_M5516_1	pwm	0.584752	0.62937	0.044618
ENCFF719FXT	choroid-plexus-epithelial-cell	JUND_HS_SELEX_M0320_1	pwm	0.587964	0.67764	0.089676
ENCFF719FXT	choroid-plexus-epithelial-cell	MAFB_MM_PBM_M0321_1	pwm	0.498208	0.607886	0.109678
ENCFF437IAA	CMK	ELF1_HS_SELEX_M5373_1	pwm	0.553384	0.644422	0.091038
ENCFF437IAA	CMK	RUNX3_HS_SELEX_M5792_1	pwm	0.511014	0.672062	0.161048
ENCFF024DAR	common-myeloid-progenitor_-CD34-positive	ELF1_HS_SELEX_M5373_1	pwm	0.57864	0.70936	0.13072
ENCFF024DAR	common-myeloid-progenitor_-CD34-positive	FLI1_HS_SELEX_M5431_1	pwm	0.59701	0.798822	0.201812
ENCFF024DAR	common-myeloid-progenitor_-CD34-positive	RUNX3_HS_SELEX_M5792_1	pwm	0.50206	0.702226	0.200166
ENCFF024DAR	common-myeloid-progenitor_-CD34-positive	SFPI1_HS_SELEX_M5863_1	pwm	0.52509	0.60378	0.07869
ENCFF059VUS	common-myeloid-progenitor_-CD34-positive	ELF1_HS_SELEX_M5373_1	pwm	0.590864	0.717868	0.127004
ENCFF059VUS	common-myeloid-progenitor_-CD34-positive	MYF6_MM_PBM_M0210_1	pwm	0.497068	0.63157	0.134502
ENCFF059VUS	common-myeloid-progenitor_-CD34-positive	NEUROG2_HS_SELEX_M5653_1	pwm	0.48839	0.640228	0.151838
ENCFF059VUS	common-myeloid-progenitor_-CD34-positive	OLIG1_HS_SELEX_M5690_1	pwm	0.498	0.610016	0.112016
ENCFF059VUS	common-myeloid-progenitor_-CD34-positive	RUNX3_HS_SELEX_M5792_1	pwm	0.510456	0.73175	0.221294
ENCFF059VUS	common-myeloid-progenitor_-CD34-positive	SFPI1_HS_SELEX_M5863_1	pwm	0.54896	0.606768	0.057808
ENCFF110CYC	common-myeloid-progenitor_-CD34-positive	ELF1_HS_SELEX_M5373_1	pwm	0.596638	0.724374	0.127736
ENCFF110CYC	common-myeloid-progenitor_-CD34-positive	GATA6_MM_PBM_M0782_1	pwm	0.584214	0.636504	0.05229
ENCFF110CYC	common-myeloid-progenitor_-CD34-positive	MYF6_MM_PBM_M0210_1	pwm	0.517762	0.619968	0.102206
ENCFF110CYC	common-myeloid-progenitor_-CD34-positive	NEUROG2_HS_SELEX_M5653_1	pwm	0.51709	0.621126	0.104036
ENCFF110CYC	common-myeloid-progenitor_-CD34-positive	RUNX3_HS_SELEX_M5792_1	pwm	0.54357	0.720278	0.176708
ENCFF110CYC	common-myeloid-progenitor_-CD34-positive	SFPI1_HS_SELEX_M5863_1	pwm	0.55542	0.608608	0.053188
ENCFF171LSI	common-myeloid-progenitor_-CD34-positive	ELF1_HS_SELEX_M5373_1	pwm	0.56168	0.697552	0.135872
ENCFF171LSI	common-myeloid-progenitor_-CD34-positive	FLI1_HS_SELEX_M5431_1	pwm	0.583578	0.769896	0.186318
ENCFF171LSI	common-myeloid-progenitor_-CD34-positive	RUNX3_HS_SELEX_M5792_1	pwm	0.481904	0.692498	0.210594
ENCFF171LSI	common-myeloid-progenitor_-CD34-positive	SFPI1_HS_SELEX_M5863_1	pwm	0.533342	0.607876	0.074534
ENCFF365IGK	common-myeloid-progenitor_-CD34-positive	MYF6_MM_PBM_M0210_1	pwm	0.515216	0.624512	0.109296
ENCFF365IGK	common-myeloid-progenitor_-CD34-positive	NEUROG2_HS_SELEX_M5653_1	pwm	0.525146	0.609952	0.084806
ENCFF365IGK	common-myeloid-progenitor_-CD34-positive	RUNX3_HS_SELEX_M5792_1	pwm	0.548114	0.725202	0.177088
ENCFF365IGK	common-myeloid-progenitor_-CD34-positive	SFPI1_HS_SELEX_M5863_1	pwm	0.55485	0.617312	0.062462
ENCFF388FUA	common-myeloid-progenitor_-CD34-positive	ELF1_HS_SELEX_M5373_1	pwm	0.580716	0.730888	0.150172
ENCFF388FUA	common-myeloid-progenitor_-CD34-positive	FLI1_HS_SELEX_M5431_1	pwm	0.586216	0.802932	0.216716
ENCFF388FUA	common-myeloid-progenitor_-CD34-positive	GATA6_MM_PBM_M0782_1	pwm	0.597266	0.619294	0.022028
ENCFF388FUA	common-myeloid-progenitor_-CD34-positive	MYBL1_HS_SELEX_M5645_1	pwm	0.5689	0.600664	0.031764
ENCFF388FUA	common-myeloid-progenitor_-CD34-positive	MYF6_MM_PBM_M0210_1	pwm	0.47596	0.609482	0.133522
ENCFF388FUA	common-myeloid-progenitor_-CD34-positive	NEUROG2_HS_SELEX_M5653_1	pwm	0.462162	0.622662	0.1605
ENCFF388FUA	common-myeloid-progenitor_-CD34-positive	RUNX3_HS_SELEX_M5792_1	pwm	0.492918	0.714338	0.22142
ENCFF388FUA	common-myeloid-progenitor_-CD34-positive	SFPI1_HS_SELEX_M5863_1	pwm	0.539384	0.626792	0.087408
ENCFF450BGX	common-myeloid-progenitor_-CD34-positive	GATA6_MM_PBM_M0782_1	pwm	0.591554	0.674912	0.083358
ENCFF450BGX	common-myeloid-progenitor_-CD34-positive	MYBL1_HS_SELEX_M5645_1	pwm	0.581996	0.602464	0.020468
ENCFF450BGX	common-myeloid-progenitor_-CD34-positive	MYF6_MM_PBM_M0210_1	pwm	0.538106	0.62912	0.091014
ENCFF450BGX	common-myeloid-progenitor_-CD34-positive	NEUROG2_HS_SELEX_M5653_1	pwm	0.50736	0.603282	0.095922
ENCFF450BGX	common-myeloid-progenitor_-CD34-positive	RUNX3_HS_SELEX_M5792_1	pwm	0.5657	0.719744	0.154044
ENCFF450BGX	common-myeloid-progenitor_-CD34-positive	SFPI1_HS_SELEX_M5863_1	pwm	0.562208	0.621796	0.059588
ENCFF725QIG	common-myeloid-progenitor_-CD34-positive	ELF1_HS_SELEX_M5373_1	pwm	0.575316	0.70509	0.129774
ENCFF725QIG	common-myeloid-progenitor_-CD34-positive	FLI1_HS_SELEX_M5431_1	pwm	0.59991	0.786224	0.186314
ENCFF725QIG	common-myeloid-progenitor_-CD34-positive	RUNX3_HS_SELEX_M5792_1	pwm	0.529682	0.708014	0.178332
ENCFF725QIG	common-myeloid-progenitor_-CD34-positive	SFPI1_HS_SELEX_M5863_1	pwm	0.528664	0.602744	0.07408
ENCFF743UIM	common-myeloid-progenitor_-CD34-positive	ELF1_HS_SELEX_M5373_1	pwm	0.57743	0.704552	0.127122
ENCFF743UIM	common-myeloid-progenitor_-CD34-positive	MYF6_MM_PBM_M0210_1	pwm	0.491056	0.605144	0.114088
ENCFF743UIM	common-myeloid-progenitor_-CD34-positive	NEUROG2_HS_SELEX_M5653_1	pwm	0.462978	0.609596	0.146618
ENCFF743UIM	common-myeloid-progenitor_-CD34-positive	RUNX3_HS_SELEX_M5792_1	pwm	0.501938	0.70776	0.205822
ENCFF854EJY	common-myeloid-progenitor_-CD34-positive	ELF1_HS_SELEX_M5373_1	pwm	0.59772	0.701572	0.103852
ENCFF854EJY	common-myeloid-progenitor_-CD34-positive	MYF6_MM_PBM_M0210_1	pwm	0.469358	0.618608	0.14925
ENCFF854EJY	common-myeloid-progenitor_-CD34-positive	NEUROG2_HS_SELEX_M5653_1	pwm	0.470034	0.609956	0.139922
ENCFF854EJY	common-myeloid-progenitor_-CD34-positive	RUNX3_HS_SELEX_M5792_1	pwm	0.47676	0.735384	0.258624
ENCFF854EJY	common-myeloid-progenitor_-CD34-positive	SFPI1_HS_SELEX_M5863_1	pwm	0.548384	0.6052	0.056816
ENCFF856BCY	common-myeloid-progenitor_-CD34-positive	MYF6_MM_PBM_M0210_1	pwm	0.522964	0.636174	0.11321
ENCFF856BCY	common-myeloid-progenitor_-CD34-positive	NEUROG2_HS_SELEX_M5653_1	pwm	0.498692	0.6425	0.143808
ENCFF856BCY	common-myeloid-progenitor_-CD34-positive	RUNX3_HS_SELEX_M5792_1	pwm	0.54377	0.72872	0.18495
ENCFF856BCY	common-myeloid-progenitor_-CD34-positive	SFPI1_HS_SELEX_M5863_1	pwm	0.55294	0.63638	0.08344
ENCFF929VDK	common-myeloid-progenitor_-CD34-positive	GATA6_MM_PBM_M0782_1	pwm	0.596566	0.632844	0.036278
ENCFF929VDK	common-myeloid-progenitor_-CD34-positive	MYF6_MM_PBM_M0210_1	pwm	0.532048	0.617992	0.085944
ENCFF929VDK	common-myeloid-progenitor_-CD34-positive	NEUROG2_HS_SELEX_M5653_1	pwm	0.522696	0.61841	0.095714
ENCFF929VDK	common-myeloid-progenitor_-CD34-positive	RUNX3_HS_SELEX_M5792_1	pwm	0.52694	0.715524	0.188584
ENCFF929VDK	common-myeloid-progenitor_-CD34-positive	SFPI1_HS_SELEX_M5863_1	pwm	0.559486	0.614068	0.054582
ENCFF021ZDC	coronary-artery	NFIX_HS_SELEX_M5665_1	pwm	0.5619	0.675308	0.113408
ENCFF221FND	Daoy	RUNX3_HS_SELEX_M5792_1	pwm	0.502986	0.639522	0.136536
ENCFF948FCS	Daoy	RUNX3_HS_SELEX_M5792_1	pwm	0.518964	0.66179	0.142826
ENCFF045UNP	dermis-blood-vessel-endothelial-cell	ELF1_HS_SELEX_M5373_1	pwm	0.558282	0.72	0.161718
ENCFF045UNP	dermis-blood-vessel-endothelial-cell	FLI1_HS_SELEX_M5431_1	pwm	0.592018	0.816708	0.22469
ENCFF084LGH	dermis-blood-vessel-endothelial-cell	ELF1_HS_SELEX_M5373_1	pwm	0.55951	0.70484	0.14533
ENCFF084LGH	dermis-blood-vessel-endothelial-cell	FLI1_HS_SELEX_M5431_1	pwm	0.581938	0.815402	0.233464
ENCFF084LGH	dermis-blood-vessel-endothelial-cell	MEIS2_MM_PBM_M0965_1	pwm	0.581222	0.605444	0.024222
ENCFF084LGH	dermis-blood-vessel-endothelial-cell	NFATC2_HS_PBM_M1518_1	pwm	0.533054	0.674104	0.14105
ENCFF084LGH	dermis-blood-vessel-endothelial-cell	NFIX_HS_SELEX_M5665_1	pwm	0.574484	0.63196	0.057476
ENCFF084LGH	dermis-blood-vessel-endothelial-cell	TEAD1_HS_SELEX_M5904_1	pwm	0.505998	0.603972	0.097974
ENCFF419NYS	dermis-blood-vessel-endothelial-cell	ELF1_HS_SELEX_M5373_1	pwm	0.580102	0.72697	0.146868
ENCFF614FYH	dermis-blood-vessel-endothelial-cell	ELF1_HS_SELEX_M5373_1	pwm	0.531712	0.694924	0.163212
ENCFF614FYH	dermis-blood-vessel-endothelial-cell	FLI1_HS_SELEX_M5431_1	pwm	0.555036	0.798796	0.24376
ENCFF780DOD	dermis-blood-vessel-endothelial-cell	SOX4_HS_PBM_M1578_1	pwm	0.58311	0.613878	0.030768
ENCFF823QRP	dermis-blood-vessel-endothelial-cell	ELF1_HS_SELEX_M5373_1	pwm	0.555584	0.703452	0.147868
ENCFF823QRP	dermis-blood-vessel-endothelial-cell	FLI1_HS_SELEX_M5431_1	pwm	0.583714	0.794728	0.211014
ENCFF823QRP	dermis-blood-vessel-endothelial-cell	NFATC2_HS_PBM_M1518_1	pwm	0.578118	0.650562	0.072444
ENCFF823QRP	dermis-blood-vessel-endothelial-cell	NFIX_HS_SELEX_M5665_1	pwm	0.56328	0.61846	0.05518
ENCFF366UHV	dermis-microvascular-lymphatic-vessel-endothelial-cell	ELF1_HS_SELEX_M5373_1	pwm	0.560128	0.703034	0.142906
ENCFF366UHV	dermis-microvascular-lymphatic-vessel-endothelial-cell	FLI1_HS_SELEX_M5431_1	pwm	0.59377	0.790406	0.196636
ENCFF606XQS	dermis-microvascular-lymphatic-vessel-endothelial-cell	ELF1_HS_SELEX_M5373_1	pwm	0.569514	0.697026	0.127512
ENCFF606XQS	dermis-microvascular-lymphatic-vessel-endothelial-cell	FLI1_HS_SELEX_M5431_1	pwm	0.595478	0.784906	0.189428
ENCFF606XQS	dermis-microvascular-lymphatic-vessel-endothelial-cell	JUND_HS_SELEX_M0320_1	pwm	0.591188	0.607364	0.016176
ENCFF606XQS	dermis-microvascular-lymphatic-vessel-endothelial-cell	NFIX_HS_SELEX_M5665_1	pwm	0.590256	0.610104	0.019848
ENCFF734QSB	dermis-microvascular-lymphatic-vessel-endothelial-cell	ELF1_HS_SELEX_M5373_1	pwm	0.585688	0.706504	0.120816
ENCFF734QSB	dermis-microvascular-lymphatic-vessel-endothelial-cell	FOXA2_MM_PBM_M0729_1	pwm	0.564158	0.614464	0.050306
ENCFF734QSB	dermis-microvascular-lymphatic-vessel-endothelial-cell	NFATC2_HS_PBM_M1518_1	pwm	0.592822	0.679748	0.086926
ENCFF878LVP	dermis-microvascular-lymphatic-vessel-endothelial-cell	ELF1_HS_SELEX_M5373_1	pwm	0.567022	0.70762	0.140598
ENCFF878LVP	dermis-microvascular-lymphatic-vessel-endothelial-cell	NFATC2_HS_PBM_M1518_1	pwm	0.58483	0.675804	0.090974
ENCFF153SDP	EL	RUNX3_HS_SELEX_M5792_1	pwm	0.49917	0.606212	0.107042
ENCFF153SDP	EL	TEAD1_HS_SELEX_M5904_1	pwm	0.547282	0.699942	0.15266
ENCFF513DVK	EL	RUNX3_HS_SELEX_M5792_1	pwm	0.516846	0.605958	0.089112
ENCFF513DVK	EL	TEAD1_HS_SELEX_M5904_1	pwm	0.532476	0.675706	0.14323
ENCFF304NJX	ELR	FLI1_HS_SELEX_M5431_1	pwm	0.594536	0.625738	0.031202
ENCFF304NJX	ELR	TEAD1_HS_SELEX_M5904_1	pwm	0.562208	0.62393	0.061722
ENCFF899ISV	ELR	FLI1_HS_SELEX_M5431_1	pwm	0.580138	0.620734	0.040596
ENCFF899ISV	ELR	TEAD1_HS_SELEX_M5904_1	pwm	0.520742	0.640932	0.12019
ENCFF073TCP	endodermal-cell	CTCF_HS_SELEX_M5331_1	pwm	0.578246	0.603992	0.025746
ENCFF073TCP	endodermal-cell	ZIC1_HS_SELEX_M5963_1	pwm	0.477116	0.620384	0.143268
ENCFF073TCP	endodermal-cell	ZNF202_MM_PBM_M0404_1	pwm	0.587238	0.643	0.055762
ENCFF222SCR	endodermal-cell	ZIC1_HS_SELEX_M5963_1	pwm	0.48384	0.61772	0.13388
ENCFF097KBE	endothelial-cell-of-umbilical-vein	ELF1_HS_SELEX_M5373_1	pwm	0.56863	0.677768	0.109138
ENCFF097KBE	endothelial-cell-of-umbilical-vein	FLI1_HS_SELEX_M5431_1	pwm	0.599904	0.763514	0.16361
ENCFF097KBE	endothelial-cell-of-umbilical-vein	NFIX_HS_SELEX_M5665_1	pwm	0.56281	0.627144	0.064334
ENCFF184TWB	epithelial-cell-of-esophagus	GRHL1_HS_SELEX_M5498_1	pwm	0.594142	0.627532	0.03339
ENCFF184TWB	epithelial-cell-of-esophagus	HLF_HS_SELEX_M5516_1	pwm	0.597398	0.610056	0.012658
ENCFF184TWB	epithelial-cell-of-esophagus	IRX2_HS_SELEX_M5581_1	pwm	0.543864	0.607166	0.063302
ENCFF184TWB	epithelial-cell-of-esophagus	SNAI2_HS_SELEX_M5809_1	pwm	0.562508	0.610728	0.04822
ENCFF527EJQ	epithelial-cell-of-esophagus	CEBPB_HS_SELEX_M5314_1	pwm	0.578396	0.615142	0.036746
ENCFF527EJQ	epithelial-cell-of-esophagus	GRHL1_HS_SELEX_M5498_1	pwm	0.54644	0.628632	0.082192
ENCFF527EJQ	epithelial-cell-of-esophagus	P53_HS_SELEX_M6105_1	pwm	0.563076	0.726704	0.163628
ENCFF238YWY	epithelial-cell-of-prostate	GRHL1_HS_SELEX_M5498_1	pwm	0.557634	0.624738	0.067104
ENCFF238YWY	epithelial-cell-of-prostate	P53_HS_SELEX_M6105_1	pwm	0.598208	0.704332	0.106124
ENCFF238YWY	epithelial-cell-of-prostate	SNAI2_HS_SELEX_M5809_1	pwm	0.523852	0.606522	0.08267
ENCFF608WCU	epithelial-cell-of-prostate	GRHL1_HS_SELEX_M5498_1	pwm	0.566296	0.621806	0.05551
ENCFF608WCU	epithelial-cell-of-prostate	IRX2_HS_SELEX_M5581_1	pwm	0.560396	0.607622	0.047226
ENCFF608WCU	epithelial-cell-of-prostate	IRX5_HS_SELEX_M5582_1	pwm	0.555016	0.606646	0.05163
ENCFF608WCU	epithelial-cell-of-prostate	P53_HS_SELEX_M6105_1	pwm	0.583326	0.694806	0.11148
ENCFF608WCU	epithelial-cell-of-prostate	SNAI2_HS_SELEX_M5809_1	pwm	0.54058	0.609148	0.068568
ENCFF231GLQ	epithelial-cell-of-proximal-tubule	CEBPB_HS_SELEX_M5314_1	pwm	0.58209	0.601848	0.019758
ENCFF231GLQ	epithelial-cell-of-proximal-tubule	TEAD1_HS_SELEX_M5904_1	pwm	0.567462	0.617262	0.0498
ENCFF984RUT	eye	MEIS2_MM_PBM_M0965_1	pwm	0.52899	0.618572	0.089582
ENCFF984RUT	eye	VENTXselex_HS_SELEX_M5947_1	pwm	0.526396	0.609404	0.083008
ENCFF178BEG	fibroblast-of-dermis	NEUROG2_HS_SELEX_M5653_1	pwm	0.562202	0.63993	0.077728
ENCFF178BEG	fibroblast-of-dermis	OLIG1_HS_SELEX_M5690_1	pwm	0.543978	0.601076	0.057098
ENCFF178BEG	fibroblast-of-dermis	TWIST2_MM_PBM_M0177_1	pwm	0.569166	0.618108	0.048942
ENCFF445GCV	fibroblast-of-dermis	MYF6_MM_PBM_M0210_1	pwm	0.561542	0.615374	0.053832
ENCFF445GCV	fibroblast-of-dermis	NEUROG2_HS_SELEX_M5653_1	pwm	0.55936	0.659642	0.100282
ENCFF445GCV	fibroblast-of-dermis	OLIG1_HS_SELEX_M5690_1	pwm	0.547052	0.609834	0.062782
ENCFF445GCV	fibroblast-of-dermis	TWIST2_MM_PBM_M0177_1	pwm	0.56793	0.630992	0.063062
ENCFF063MTX	fibroblast-of-gingiva	CEBPB_HS_SELEX_M5314_1	pwm	0.598636	0.69961	0.100974
ENCFF063MTX	fibroblast-of-gingiva	NEUROG2_HS_SELEX_M5653_1	pwm	0.515324	0.626264	0.11094
ENCFF063MTX	fibroblast-of-gingiva	NFIX_HS_SELEX_M5665_1	pwm	0.595272	0.679304	0.084032
ENCFF741BMK	fibroblast-of-gingiva	CEBPB_HS_SELEX_M5314_1	pwm	0.58057	0.674314	0.093744
ENCFF741BMK	fibroblast-of-gingiva	HLF_HS_SELEX_M5516_1	pwm	0.594072	0.645572	0.0515
ENCFF741BMK	fibroblast-of-gingiva	NEUROG2_HS_SELEX_M5653_1	pwm	0.532648	0.617928	0.08528
ENCFF741BMK	fibroblast-of-gingiva	NFIX_HS_SELEX_M5665_1	pwm	0.593164	0.660548	0.067384
ENCFF331SYD	fibroblast-of-lung	TEAD1_HS_SELEX_M5904_1	pwm	0.58371	0.66538	0.08167
ENCFF334RSR	fibroblast-of-lung	HLF_HS_SELEX_M5516_1	pwm	0.598424	0.63344	0.035016
ENCFF334RSR	fibroblast-of-lung	MYF6_MM_PBM_M0210_1	pwm	0.505008	0.614082	0.109074
ENCFF334RSR	fibroblast-of-lung	NEUROG2_HS_SELEX_M5653_1	pwm	0.497944	0.620888	0.122944
ENCFF334RSR	fibroblast-of-lung	NFIX_HS_SELEX_M5665_1	pwm	0.579606	0.636694	0.057088
ENCFF644XOI	fibroblast-of-lung	CEBPB_HS_SELEX_M5314_1	pwm	0.597202	0.672946	0.075744
ENCFF644XOI	fibroblast-of-lung	HLF_HS_SELEX_M5516_1	pwm	0.593872	0.657776	0.063904
ENCFF644XOI	fibroblast-of-lung	MYF6_MM_PBM_M0210_1	pwm	0.520806	0.610688	0.089882
ENCFF644XOI	fibroblast-of-lung	NEUROG2_HS_SELEX_M5653_1	pwm	0.511346	0.61911	0.107764
ENCFF681UOZ	fibroblast-of-lung	TEAD1_HS_SELEX_M5904_1	pwm	0.586656	0.643828	0.057172
ENCFF042ALK	fibroblast-of-mammary-gland	MYF6_MM_PBM_M0210_1	pwm	0.534424	0.602266	0.067842
ENCFF042ALK	fibroblast-of-mammary-gland	NEUROG2_HS_SELEX_M5653_1	pwm	0.510872	0.61261	0.101738
ENCFF089IWT	fibroblast-of-peridontal-ligament	RUNX3_HS_SELEX_M5792_1	pwm	0.49777	0.632652	0.134882
ENCFF620HKT	fibroblast-of-peridontal-ligament	HLF_HS_SELEX_M5516_1	pwm	0.57248	0.63534	0.06286
ENCFF620HKT	fibroblast-of-peridontal-ligament	NEUROG2_HS_SELEX_M5653_1	pwm	0.526874	0.609038	0.082164
ENCFF620HKT	fibroblast-of-peridontal-ligament	RUNX3_HS_SELEX_M5792_1	pwm	0.563632	0.635258	0.071626
ENCFF620HKT	fibroblast-of-peridontal-ligament	TEAD1_HS_SELEX_M5904_1	pwm	0.55832	0.613214	0.054894
ENCFF385ZNB	fibroblast-of-pulmonary-artery	FLI1_HS_SELEX_M5431_1	pwm	0.578176	0.619316	0.04114
ENCFF385ZNB	fibroblast-of-pulmonary-artery	JUND_HS_SELEX_M0320_1	pwm	0.595744	0.65492	0.059176
ENCFF385ZNB	fibroblast-of-pulmonary-artery	NFIX_HS_SELEX_M5665_1	pwm	0.595432	0.634152	0.03872
ENCFF385ZNB	fibroblast-of-pulmonary-artery	TEAD1_HS_SELEX_M5904_1	pwm	0.532088	0.609784	0.077696
ENCFF417VBX	fibroblast-of-pulmonary-artery	FLI1_HS_SELEX_M5431_1	pwm	0.53203	0.607574	0.075544
ENCFF417VBX	fibroblast-of-pulmonary-artery	NFIX_HS_SELEX_M5665_1	pwm	0.572498	0.64354	0.071042
ENCFF045KGY	fibroblast-of-skin-of-abdomen	RUNX3_HS_SELEX_M5792_1	pwm	0.495212	0.644842	0.14963
ENCFF045KGY	fibroblast-of-skin-of-abdomen	TEAD1_HS_SELEX_M5904_1	pwm	0.552872	0.662388	0.109516
ENCFF336MQK	fibroblast-of-skin-of-left-biceps	NEUROG2_HS_SELEX_M5653_1	pwm	0.481756	0.609706	0.12795
ENCFF336MQK	fibroblast-of-skin-of-left-biceps	NFIX_HS_SELEX_M5665_1	pwm	0.585052	0.613056	0.028004
ENCFF336MQK	fibroblast-of-skin-of-left-biceps	OLIG1_HS_SELEX_M5690_1	pwm	0.485606	0.602286	0.11668
ENCFF336MQK	fibroblast-of-skin-of-left-biceps	RUNX3_HS_SELEX_M5792_1	pwm	0.528008	0.630678	0.10267
ENCFF336MQK	fibroblast-of-skin-of-left-biceps	TEAD1_HS_SELEX_M5904_1	pwm	0.562624	0.656778	0.094154
ENCFF837VPM	fibroblast-of-skin-of-left-biceps	JUND_HS_SELEX_M0320_1	pwm	0.597432	0.640412	0.04298
ENCFF837VPM	fibroblast-of-skin-of-left-biceps	NEUROG2_HS_SELEX_M5653_1	pwm	0.48984	0.60147	0.11163
ENCFF837VPM	fibroblast-of-skin-of-left-biceps	NFIX_HS_SELEX_M5665_1	pwm	0.597482	0.607624	0.010142
ENCFF837VPM	fibroblast-of-skin-of-left-biceps	RUNX3_HS_SELEX_M5792_1	pwm	0.502116	0.627244	0.125128
ENCFF837VPM	fibroblast-of-skin-of-left-biceps	TEAD1_HS_SELEX_M5904_1	pwm	0.58147	0.659784	0.078314
ENCFF474QAJ	fibroblast-of-skin-of-left-quadriceps	JUND_HS_SELEX_M0320_1	pwm	0.593918	0.63799	0.044072
ENCFF474QAJ	fibroblast-of-skin-of-left-quadriceps	RUNX3_HS_SELEX_M5792_1	pwm	0.481116	0.624798	0.143682
ENCFF474QAJ	fibroblast-of-skin-of-left-quadriceps	TEAD1_HS_SELEX_M5904_1	pwm	0.558812	0.65323	0.094418
ENCFF488SRU	fibroblast-of-skin-of-left-quadriceps	JUND_HS_SELEX_M0320_1	pwm	0.58708	0.635402	0.048322
ENCFF488SRU	fibroblast-of-skin-of-left-quadriceps	NEUROG2_HS_SELEX_M5653_1	pwm	0.49744	0.606504	0.109064
ENCFF488SRU	fibroblast-of-skin-of-left-quadriceps	RUNX3_HS_SELEX_M5792_1	pwm	0.50478	0.628066	0.123286
ENCFF488SRU	fibroblast-of-skin-of-left-quadriceps	TEAD1_HS_SELEX_M5904_1	pwm	0.573546	0.66852	0.094974
ENCFF382NHI	fibroblast-of-skin-of-right-biceps	RUNX3_HS_SELEX_M5792_1	pwm	0.50405	0.64045	0.1364
ENCFF382NHI	fibroblast-of-skin-of-right-biceps	TEAD1_HS_SELEX_M5904_1	pwm	0.590394	0.681184	0.09079
ENCFF191HPU	fibroblast-of-skin-of-right-quadriceps	RUNX3_HS_SELEX_M5792_1	pwm	0.496604	0.627818	0.131214
ENCFF191HPU	fibroblast-of-skin-of-right-quadriceps	TEAD1_HS_SELEX_M5904_1	pwm	0.54615	0.67675	0.1306
ENCFF163TAJ	fibroblast-of-skin-of-scalp	JUND_HS_SELEX_M0320_1	pwm	0.561298	0.614308	0.05301
ENCFF163TAJ	fibroblast-of-skin-of-scalp	RUNX3_HS_SELEX_M5792_1	pwm	0.45946	0.61337	0.15391
ENCFF163TAJ	fibroblast-of-skin-of-scalp	TEAD1_HS_SELEX_M5904_1	pwm	0.56597	0.70514	0.13917
ENCFF594OFO	fibroblast-of-skin-of-scalp	RUNX3_HS_SELEX_M5792_1	pwm	0.467958	0.609168	0.14121
ENCFF594OFO	fibroblast-of-skin-of-scalp	TEAD1_HS_SELEX_M5904_1	pwm	0.564176	0.701614	0.137438
ENCFF073TWU	fibroblast-of-skin-of-upper-back	NFIX_HS_SELEX_M5665_1	pwm	0.570314	0.604578	0.034264
ENCFF073TWU	fibroblast-of-skin-of-upper-back	RUNX3_HS_SELEX_M5792_1	pwm	0.500382	0.656356	0.155974
ENCFF073TWU	fibroblast-of-skin-of-upper-back	TEAD1_HS_SELEX_M5904_1	pwm	0.568126	0.677294	0.109168
ENCFF469AJE	fibroblast-of-skin-of-upper-back	RUNX3_HS_SELEX_M5792_1	pwm	0.52371	0.65832	0.13461
ENCFF469AJE	fibroblast-of-skin-of-upper-back	TEAD1_HS_SELEX_M5904_1	pwm	0.56872	0.671158	0.102438
ENCFF904WZA	fibroblast-of-the-aortic-adventitia	NFIA_HS_SELEX_M5661_1	pwm	0.547618	0.608804	0.061186
ENCFF904WZA	fibroblast-of-the-aortic-adventitia	TEAD1_HS_SELEX_M5904_1	pwm	0.511556	0.608776	0.09722
ENCFF990HMA	fibroblast-of-the-aortic-adventitia	HLF_HS_SELEX_M5516_1	pwm	0.599578	0.612086	0.012508
ENCFF990HMA	fibroblast-of-the-aortic-adventitia	TEAD1_HS_SELEX_M5904_1	pwm	0.527932	0.61346	0.085528
ENCFF272AFT	fibroblast-of-the-conjunctiva	HLF_HS_SELEX_M5516_1	pwm	0.591616	0.616684	0.025068
ENCFF272AFT	fibroblast-of-the-conjunctiva	JUND_HS_SELEX_M0320_1	pwm	0.583902	0.611964	0.028062
ENCFF272AFT	fibroblast-of-the-conjunctiva	NFIX_HS_SELEX_M5665_1	pwm	0.54403	0.64436	0.10033
ENCFF764ODA	fibroblast-of-the-conjunctiva	CEBPB_HS_SELEX_M5314_1	pwm	0.59126	0.639244	0.047984
ENCFF764ODA	fibroblast-of-the-conjunctiva	HLF_HS_SELEX_M5516_1	pwm	0.56988	0.626786	0.056906
ENCFF764ODA	fibroblast-of-the-conjunctiva	NEUROG2_HS_SELEX_M5653_1	pwm	0.503066	0.600412	0.097346
ENCFF764ODA	fibroblast-of-the-conjunctiva	NFIX_HS_SELEX_M5665_1	pwm	0.59087	0.649638	0.058768
ENCFF221FPW	fibroblast-of-villous-mesenchyme	CEBPB_HS_SELEX_M5314_1	pwm	0.57804	0.647772	0.069732
ENCFF221FPW	fibroblast-of-villous-mesenchyme	HLF_HS_SELEX_M5516_1	pwm	0.561336	0.64668	0.085344
ENCFF221FPW	fibroblast-of-villous-mesenchyme	JUND_HS_SELEX_M0320_1	pwm	0.588418	0.620528	0.03211
ENCFF221FPW	fibroblast-of-villous-mesenchyme	NEUROG2_HS_SELEX_M5653_1	pwm	0.484676	0.600026	0.11535
ENCFF221FPW	fibroblast-of-villous-mesenchyme	TEAD1_HS_SELEX_M5904_1	pwm	0.516092	0.614042	0.09795
ENCFF311UAO	fibroblast-of-villous-mesenchyme	RUNX3_HS_SELEX_M5792_1	pwm	0.48417	0.600808	0.116638
ENCFF850STV	forelimb-muscle	MYF6_MM_PBM_M0210_1	pwm	0.49251	0.652656	0.160146
ENCFF850STV	forelimb-muscle	NEUROG2_HS_SELEX_M5653_1	pwm	0.472664	0.622534	0.14987
ENCFF850STV	forelimb-muscle	NFATC2_HS_PBM_M1518_1	pwm	0.57266	0.663706	0.091046
ENCFF850STV	forelimb-muscle	NFIX_HS_SELEX_M5665_1	pwm	0.547608	0.698646	0.151038
ENCFF850STV	forelimb-muscle	ZBTB18_HS_SELEX_M5968_1	pwm	0.47816	0.65992	0.18176
ENCFF032LRL	foreskin-fibroblast	HLF_HS_SELEX_M5516_1	pwm	0.59962	0.608054	0.008434
ENCFF032LRL	foreskin-fibroblast	MYF6_MM_PBM_M0210_1	pwm	0.530432	0.615532	0.0851
ENCFF032LRL	foreskin-fibroblast	NEUROG2_HS_SELEX_M5653_1	pwm	0.54279	0.657924	0.115134
ENCFF032LRL	foreskin-fibroblast	OLIG1_HS_SELEX_M5690_1	pwm	0.53443	0.621096	0.086666
ENCFF032LRL	foreskin-fibroblast	TEAD1_HS_SELEX_M5904_1	pwm	0.54353	0.628308	0.084778
ENCFF032LRL	foreskin-fibroblast	TWIST2_MM_PBM_M0177_1	pwm	0.534252	0.605744	0.071492
ENCFF090PQC	foreskin-fibroblast	JUND_HS_SELEX_M0320_1	pwm	0.577402	0.617072	0.03967
ENCFF090PQC	foreskin-fibroblast	NEUROG2_HS_SELEX_M5653_1	pwm	0.492914	0.61954	0.126626
ENCFF169THH	foreskin-fibroblast	JUND_HS_SELEX_M0320_1	pwm	0.59297	0.675808	0.082838
ENCFF329APP	foreskin-fibroblast	NEUROG2_HS_SELEX_M5653_1	pwm	0.532444	0.626416	0.093972
ENCFF329APP	foreskin-fibroblast	OLIG1_HS_SELEX_M5690_1	pwm	0.519894	0.613126	0.093232
ENCFF479KXR	foreskin-fibroblast	CEBPB_HS_SELEX_M5314_1	pwm	0.592534	0.600346	0.007812
ENCFF479KXR	foreskin-fibroblast	HLF_HS_SELEX_M5516_1	pwm	0.595122	0.621392	0.02627
ENCFF479KXR	foreskin-fibroblast	NEUROG2_HS_SELEX_M5653_1	pwm	0.523668	0.640408	0.11674
ENCFF479KXR	foreskin-fibroblast	NFIX_HS_SELEX_M5665_1	pwm	0.572176	0.66017	0.087994
ENCFF479KXR	foreskin-fibroblast	OLIG1_HS_SELEX_M5690_1	pwm	0.536186	0.623362	0.087176
ENCFF479KXR	foreskin-fibroblast	TWIST2_MM_PBM_M0177_1	pwm	0.536184	0.613244	0.07706
ENCFF479KXR	foreskin-fibroblast	ZBTB18_HS_SELEX_M5968_1	pwm	0.498148	0.601318	0.10317
ENCFF811FJV	foreskin-fibroblast	NEUROG2_HS_SELEX_M5653_1	pwm	0.4971	0.606192	0.109092
ENCFF637CAJ	foreskin-keratinocyte	P53_HS_SELEX_M6105_1	pwm	0.593474	0.67162	0.078146
ENCFF719FAT	foreskin-keratinocyte	P53_HS_SELEX_M6105_1	pwm	0.558854	0.660872	0.102018
ENCFF331ODX	foreskin-melanocyte	SOX4_HS_PBM_M1578_1	pwm	0.554622	0.63	0.075378
ENCFF838FGZ	foreskin-melanocyte	SOX4_HS_PBM_M1578_1	pwm	0.554508	0.63843	0.083922
ENCFF758SYE	gastrocnemius-medialis	ID4_HS_SELEX_M5571_1	pwm	0.434418	0.605158	0.17074
ENCFF758SYE	gastrocnemius-medialis	MEIS2_MM_PBM_M0965_1	pwm	0.582662	0.630466	0.047804
ENCFF758SYE	gastrocnemius-medialis	MYF6_MM_PBM_M0210_1	pwm	0.514622	0.60864	0.094018
ENCFF758SYE	gastrocnemius-medialis	NFIX_HS_SELEX_M5665_1	pwm	0.588462	0.682534	0.094072
ENCFF758SYE	gastrocnemius-medialis	PAX5_HS_CHIPSEQ_M4705_1	pwm	0.57198	0.603728	0.031748
ENCFF758SYE	gastrocnemius-medialis	TCF3_HS_SELEX_M5900_1	pwm	0.407242	0.608708	0.201466
ENCFF927KUT	glomerular-endothelial-cell	NFATC2_HS_PBM_M1518_1	pwm	0.559924	0.61304	0.053116
[truncated: 124,272 more rows]

## Sheet: S3.2 MEDEA Thresholds
Supplemental Table S3.2: Motif-based thresholds to sort the high pools of MEDEA AUROC values (Figures 4 and 5).
Specificity Model	MEDEA Threshold
AP2_kmer	0.56
AP4_kmer	0.531
AR_pwm	0.553
ARID3_kmer	0.528
ARID5_kmer	0.521
AThook_PWWP_kmer	0.52
BARH_kmer	0.532
BCL_kmer	0.529
BCL6b_pwm	0.55
bHLH_kmer	0.574
bHLH_CENP_kmer	0.531
bHLHb2_kmer	0.546
bZIP_kmer	0.589
bZIP_CEBP_kmer	0.536
bZIP_SAND_kmer	0.578
CDX2_pwm	0.582
CEBP_kmer	0.563
CEBPB_pwm	0.612
CENP_zfCXXC_kmer	0.534
CPEB1_pwm	0.564
CTCF_pwm	0.549
CXC_kmer	0.526
DHARMA_kmer	0.514
DM_kmer	0.532
DOBOX_kmer	0.519
DUX-LHX_kmer	0.53
E2A_kmer	0.557
E2F_zfC2H2_kmer	0.578
E2F1_pwm	0.565
EBF1_pwm	0.556
EGR_kmer	0.543
ELF1_pwm	0.599
ESR1_pwm	0.522
ESR2_pwm	0.572
ESRR_kmer	0.522
ESRR-II_kmer	0.529
ETS_kmer	0.641
ETSI_kmer	0.553
ETSIII_kmer	0.553
ETSIV_kmer	0.527
FLI1_pwm	0.626
FOX_kmer	0.577
FOXA2_pwm	0.587
FOXB1_pwm	0.59
FOXM_kmer	0.548
FOXN_kmer	0.551
FOXR_kmer	0.557
G28216001_kmer	0.529
GATA_kmer	0.523
GATA6_pwm	0.621
GCM_kmer	0.542
GCM1_pwm	0.534
GFI1_kmer	0.535
GLI_kmer	0.52
GLI2_pwm	0.517
GMEB_MADF_kmer	0.566
GR_kmer	0.536
GRHL1_pwm	0.57
Hbox_kmer	0.588
Hbox-II_kmer	0.545
Hbox-III_kmer	0.532
Hbox-POU_kmer	0.539
HBP1_kmer	0.534
HES_kmer	0.527
HIC1_kmer	0.522
HIC2_pwm	0.548
HINFP_pwm	0.558
HLF_pwm	0.627
HNF1_kmer	0.539
HNF4_kmer	0.527
HNF4A_pwm	0.529
HOX9-13_kmer	0.535
HOXD9_pwm	0.583
HSF4_pwm	0.563
HTHpsq_kmer	0.536
ID4_pwm	0.579
IRC900814_kmer	0.531
IRF_kmer	0.552
IRF4_pwm	0.531
IRF4-6_kmer	0.535
IRX_kmer	0.541
IRX2_pwm	0.6
IRX5_pwm	0.602
ISL2_pwm	0.593
JUND_pwm	0.605
KLF_kmer	0.642
KLF12_pwm	0.652
LHX4_pwm	0.649
MADF_kmer	0.533
MAF_kmer	0.564
MAFB_pwm	0.634
MAX_kmer	0.577
MEF2A_pwm	0.512
MEF2B_pwm	0.518
MEIS2_pwm	0.603
MESP1_pwm	0.583
MH1_kmer	0.555
MYB_kmer	0.548
MYBL1_pwm	0.612
MYF6_pwm	0.611
NEUROG2_pwm	0.581
NFAT_kmer	0.581
NFATC2_pwm	0.629
NFIA_pwm	0.554
NFIX_pwm	0.634
NFKB1_pwm	0.521
NFkBp50_kmer	0.552
NFkBp65_kmer	0.55
NKX_kmer	0.537
NKX-II_kmer	0.534
NR2E_kmer	0.569
NR4A_kmer	0.526
NRF1_pwm	0.55
OLIG1_pwm	0.545
ONECUT_pwm	0.525
OSR_kmer	0.514
OTX1_pwm	0.585
OVOL_kmer	0.533
P42_kmer	0.536
P53_pwm	0.528
PAX5_pwm	0.581
PBX_kmer	0.53
PHOX2B_pwm	0.61
PITX_kmer	0.535
PLAGL1_kmer	0.558
POU_kmer	0.531
POU_HMG_kmer	0.531
POU3F4_pwm	0.576
Pparg_kmer	0.523
PRDM1_pwm	0.558
PRDM11_kmer	0.534
PRDM3_pwm	0.523
PRDM4_pwm	0.53
PROX1_pwm	0.536
PWWP_AThook_kmer	0.516
RFX_kmer	0.57
RFX4primary_pwm	0.598
RFX4secondary_pwm	0.574
RHOX11_kmer	0.554
RUNX3_pwm	0.541
RXRG_pwm	0.545
SETBP1_pwm	0.611
SFPI1_pwm	0.528
SIX_kmer	0.518
SMAD3_pwm	0.535
SMARCE1_pwm	0.543
SNAI_kmer	0.489
SNAI2_pwm	0.464
Sohlh2_kmer	0.529
SOX_kmer	0.533
SOX4_pwm	0.547
SOXC_kmer	0.541
SP110_kmer	0.551
STAT1_pwm	0.581
TAL_kmer	0.53
TALE_zfC2H2_kmer	0.575
Tbox_kmer	0.486
Tbox-II_kmer	0.53
TBX5_pwm	0.535
TCF3_pwm	0.603
TCF7_kmer	0.527
TCF7_pwm	0.531
TEA_kmer	0.555
TEAD1_pwm	0.575
TERF2_kmer	0.531
TERF2_pwm	0.525
TFAP2A_pwm	0.557
TFCP2_pwm	0.602
TFE3_kmer	0.558
THRA_pwm	0.559
TWIST2_pwm	0.591
USF2_pwm	0.565
VDR_pwm	0.524
VENTXpbm_pwm	0.622
VENTXselex_pwm	0.545
XBP1_pwm	0.605
YY1_pwm	0.544
ZBED1_pwm	0.531
ZBTB1_pwm	0.582
ZBTB12_kmer	0.526
ZBTB12_pwm	0.549
ZBTB18_pwm	0.562
ZBTB3_kmer	0.53
ZBTB3_pwm	0.571
ZBTB49_pwm	0.532
ZBTB7A_pwm	0.536
zfC2H2_EGR_RHD_kmer	0.533
zfC2H2_RHD_kmer	0.61
zfC4_kmer	0.531
zfCXXC_SAND_kmer	0.528
ZFP691_kmer	0.526
ZFP959_kmer	0.522
ZFX_kmer	0.577
ZIC_kmer	0.547
ZIC1_pwm	0.561
ZKSCAN3_pwm	0.528
ZNF143_pwm	0.526
ZNF143_pwm	0.529
ZNF200_kmer	0.522
ZNF202_pwm	0.605
ZNF232_pwm	0.531
ZNF263_pwm	0.536
ZNF354C_pwm	0.529
ZNF524_pwm	0.511
ZNF655_kmer	0.528
ZNF784_pwm	0.503
ZSCAN4_kmer	0.562

## Sheet: S3.3 MEDEA AUROC High Pools
Supplemental Table 3.3: Merge of all the MEDEA AUROC high pools (Figures 4 and 5).
ENCODE ID	Cell Type	Motif	Motif Type	AUROC of Unfiltered Peaks	AUROC of MEDEA-filtered peaks	AUROC difference
ENCFF696LIK	OCI-LY7	TCF3_HS_SELEX_M5900_1	pwm	0.429154	0.755474	0.32632
ENCFF061UBG	thymus	TCF3_HS_SELEX_M5900_1	pwm	0.37407	0.698406	0.324336
ENCFF259KDP	tongue	TCF3_HS_SELEX_M5900_1	pwm	0.34826	0.669898	0.321638
ENCFF947RDC	thymus	TCF3_HS_SELEX_M5900_1	pwm	0.351328	0.666968	0.31564
ENCFF721SJU	hematopoietic-multipotent-progenitor-cell	GATA	kmer	0.50523	0.809256	0.304026
ENCFF710SFP	NAMALWA	TCF3_HS_SELEX_M5900_1	pwm	0.3762	0.676252	0.300052
ENCFF259KDP	tongue	E2A	kmer	0.4001	0.69872	0.29862
ENCFF984RKH	thymus	TCF3_HS_SELEX_M5900_1	pwm	0.395868	0.694458	0.29859
ENCFF533MFM	trophoblast-cell	AP2	kmer	0.49167	0.787072	0.295402
ENCFF696LIK	OCI-LY7	E2A	kmer	0.452286	0.74663	0.294344
ENCFF696LIK	OCI-LY7	MESP1_HS_SELEX_M5627_1	pwm	0.445114	0.738982	0.293868
ENCFF189LKP	thymus	TCF3_HS_SELEX_M5900_1	pwm	0.356582	0.649654	0.293072
ENCFF654MRJ	T-helper-1-cell	RUNX3_HS_SELEX_M5792_1	pwm	0.511996	0.804274	0.292278
ENCFF696LIK	OCI-LY7	ID4_HS_SELEX_M5571_1	pwm	0.45014	0.740494	0.290354
ENCFF061UBG	thymus	MESP1_HS_SELEX_M5627_1	pwm	0.403122	0.690114	0.286992
ENCFF733JSK	hematopoietic-multipotent-progenitor-cell	GATA	kmer	0.518838	0.804876	0.286038
ENCFF564VUG	placenta	AP2	kmer	0.422556	0.70859	0.286034
ENCFF061UBG	thymus	ID4_HS_SELEX_M5571_1	pwm	0.406718	0.692168	0.28545
ENCFF984RKH	thymus	MESP1_HS_SELEX_M5627_1	pwm	0.396614	0.680384	0.28377
ENCFF688ZSR	Jurkat-clone-E61	RUNX3_HS_SELEX_M5792_1	pwm	0.48182	0.76546	0.28364
ENCFF189LKP	thymus	RUNX3_HS_SELEX_M5792_1	pwm	0.447954	0.73116	0.283206
ENCFF655ZJF	placenta	AP2	kmer	0.468654	0.750734	0.28208
ENCFF959FMP	thymus	TCF3_HS_SELEX_M5900_1	pwm	0.358248	0.636752	0.278504
ENCFF947RDC	thymus	MESP1_HS_SELEX_M5627_1	pwm	0.372702	0.646402	0.2737
ENCFF711IJR	thymus	TCF3_HS_SELEX_M5900_1	pwm	0.367642	0.639888	0.272246
ENCFF483RJF	T-helper-17-cell	RUNX3_HS_SELEX_M5792_1	pwm	0.536326	0.807534	0.271208
ENCFF259KDP	tongue	ID4_HS_SELEX_M5571_1	pwm	0.376534	0.647252	0.270718
ENCFF533MFM	trophoblast-cell	TFAP2A_HS_SELEX_M5912_1	pwm	0.49397	0.762942	0.268972
ENCFF061UBG	thymus	E2A	kmer	0.411022	0.67995	0.268928
ENCFF259KDP	tongue	MESP1_HS_SELEX_M5627_1	pwm	0.380676	0.646186	0.26551
ENCFF852NHM	T-helper-2-cell	RUNX3_HS_SELEX_M5792_1	pwm	0.52568	0.791016	0.265336
ENCFF166VSZ	placenta	TFAP2A_HS_SELEX_M5912_1	pwm	0.46147	0.726176	0.264706
ENCFF260PQV	OCI-LY7	TCF3_HS_SELEX_M5900_1	pwm	0.39282	0.656672	0.263852
ENCFF822FIY	hematopoietic-multipotent-progenitor-cell	GATA	kmer	0.50182	0.765376	0.263556
ENCFF195KNE	T-helper-1-cell	RUNX3_HS_SELEX_M5792_1	pwm	0.483568	0.745848	0.26228
ENCFF166VSZ	placenta	AP2	kmer	0.479254	0.740352	0.261098
ENCFF880KWE	thymus	TCF3_HS_SELEX_M5900_1	pwm	0.380112	0.639222	0.25911
ENCFF061UBG	thymus	RUNX3_HS_SELEX_M5792_1	pwm	0.452024	0.711096	0.259072
ENCFF854EJY	common-myeloid-progenitor_-CD34-positive	RUNX3_HS_SELEX_M5792_1	pwm	0.47676	0.735384	0.258624
ENCFF144XMY	T-helper-2-cell	RUNX3_HS_SELEX_M5792_1	pwm	0.484936	0.743458	0.258522
ENCFF855CMV	trophoblast-cell	AP2	kmer	0.502416	0.760716	0.2583
ENCFF878HVG	NAMALWA	TCF3_HS_SELEX_M5900_1	pwm	0.41991	0.677506	0.257596
ENCFF710SFP	NAMALWA	MESP1_HS_SELEX_M5627_1	pwm	0.404038	0.661628	0.25759
ENCFF706BCL	body-of-pancreas	TCF3_HS_SELEX_M5900_1	pwm	0.415696	0.67216	0.256464
ENCFF560YBU	brain	NEUROG2_HS_SELEX_M5653_1	pwm	0.479952	0.736352	0.2564
ENCFF230WCV	brain	NEUROG2_HS_SELEX_M5653_1	pwm	0.488462	0.744326	0.255864
ENCFF181GIN	placenta	TFAP2A_HS_SELEX_M5912_1	pwm	0.4631	0.718252	0.255152
ENCFF528GDM	brain	NEUROG2_HS_SELEX_M5653_1	pwm	0.506714	0.761556	0.254842
ENCFF375XEP	brain	NEUROG2_HS_SELEX_M5653_1	pwm	0.47808	0.731914	0.253834
ENCFF814UZW	tongue	TCF3_HS_SELEX_M5900_1	pwm	0.375398	0.628608	0.25321
ENCFF181GIN	placenta	AP2	kmer	0.46665	0.719808	0.253158
ENCFF690DRM	left-lung	TCF3_HS_SELEX_M5900_1	pwm	0.358136	0.611272	0.253136
ENCFF986DGM	hematopoietic-multipotent-progenitor-cell	RUNX3_HS_SELEX_M5792_1	pwm	0.435176	0.688026	0.25285
ENCFF189LKP	thymus	MESP1_HS_SELEX_M5627_1	pwm	0.3903	0.64303	0.25273
ENCFF012QDX	T-helper-1-cell	RUNX3_HS_SELEX_M5792_1	pwm	0.579234	0.831702	0.252468
ENCFF260PQV	OCI-LY7	MESP1_HS_SELEX_M5627_1	pwm	0.403546	0.655324	0.251778
ENCFF735JRV	pancreas	TCF3_HS_SELEX_M5900_1	pwm	0.39294	0.644536	0.251596
ENCFF564VUG	placenta	TFAP2A_HS_SELEX_M5912_1	pwm	0.44046	0.691802	0.251342
ENCFF984RKH	thymus	E2A	kmer	0.431974	0.683172	0.251198
ENCFF046QJY	right-lung	TCF3_HS_SELEX_M5900_1	pwm	0.361908	0.612316	0.250408
ENCFF710SFP	NAMALWA	E2A	kmer	0.422446	0.672678	0.250232
ENCFF733JSK	hematopoietic-multipotent-progenitor-cell	GATA6_MM_PBM_M0782_1	pwm	0.630596	0.880788	0.250192
ENCFF524XCQ	bipolar-neuron	TCF3_HS_SELEX_M5900_1	pwm	0.357176	0.606382	0.249206
ENCFF947RDC	thymus	ID4_HS_SELEX_M5571_1	pwm	0.40044	0.649254	0.248814
ENCFF794AMB	left-lung	TCF3_HS_SELEX_M5900_1	pwm	0.355508	0.604262	0.248754
ENCFF655ZJF	placenta	TFAP2A_HS_SELEX_M5912_1	pwm	0.494152	0.742762	0.24861
ENCFF984RKH	thymus	ID4_HS_SELEX_M5571_1	pwm	0.43761	0.68618	0.24857
ENCFF005DMK	placenta	TFAP2A_HS_SELEX_M5912_1	pwm	0.470266	0.718726	0.24846
ENCFF005DMK	placenta	AP2	kmer	0.477052	0.724556	0.247504
ENCFF189LKP	thymus	ID4_HS_SELEX_M5571_1	pwm	0.394052	0.641036	0.246984
ENCFF855CMV	trophoblast-cell	TFAP2A_HS_SELEX_M5912_1	pwm	0.51328	0.75923	0.24595
ENCFF133YNT	natural-killer-cell	RUNX3_HS_SELEX_M5792_1	pwm	0.45273	0.698112	0.245382
ENCFF614FYH	dermis-blood-vessel-endothelial-cell	FLI1_HS_SELEX_M5431_1	pwm	0.555036	0.798796	0.24376
ENCFF304GVP	Jurkat-clone-E61	RUNX3_HS_SELEX_M5792_1	pwm	0.58701	0.830066	0.243056
ENCFF144XMY	T-helper-2-cell	FLI1_HS_SELEX_M5431_1	pwm	0.576114	0.819136	0.243022
ENCFF601PAY	thymus	TCF3_HS_SELEX_M5900_1	pwm	0.39632	0.639214	0.242894
ENCFF947RDC	thymus	RUNX3_HS_SELEX_M5792_1	pwm	0.468262	0.71004	0.241778
ENCFF959FMP	thymus	MESP1_HS_SELEX_M5627_1	pwm	0.390404	0.632064	0.24166
ENCFF601PAY	thymus	MESP1_HS_SELEX_M5627_1	pwm	0.393308	0.633818	0.24051
ENCFF481KKG	T-helper-2-cell	RUNX3_HS_SELEX_M5792_1	pwm	0.535264	0.775368	0.240104
ENCFF959FMP	thymus	RUNX3_HS_SELEX_M5792_1	pwm	0.490218	0.730192	0.239974
ENCFF822FIY	hematopoietic-multipotent-progenitor-cell	RUNX3_HS_SELEX_M5792_1	pwm	0.448158	0.687524	0.239366
ENCFF721SJU	hematopoietic-multipotent-progenitor-cell	GATA6_MM_PBM_M0782_1	pwm	0.626366	0.865648	0.239282
ENCFF259KDP	tongue	MYF6_MM_PBM_M0210_1	pwm	0.483478	0.72128	0.237802
ENCFF230WCV	brain	OLIG1_HS_SELEX_M5690_1	pwm	0.500924	0.738674	0.23775
ENCFF797QID	muscle-of-back	TCF3_HS_SELEX_M5900_1	pwm	0.370254	0.606732	0.236478
ENCFF897PRD	pancreas	TCF3_HS_SELEX_M5900_1	pwm	0.401698	0.637306	0.235608
ENCFF260PQV	OCI-LY7	E2A	kmer	0.42801	0.662894	0.234884
ENCFF814UZW	tongue	E2A	kmer	0.427578	0.662186	0.234608
ENCFF241GBQ	hematopoietic-multipotent-progenitor-cell	RUNX3_HS_SELEX_M5792_1	pwm	0.466178	0.700734	0.234556
ENCFF542RWT	muscle-of-leg	TCF3_HS_SELEX_M5900_1	pwm	0.37016	0.604572	0.234412
ENCFF168YQF	T-cell	RUNX3_HS_SELEX_M5792_1	pwm	0.496576	0.73086	0.234284
ENCFF947RDC	thymus	E2A	kmer	0.41649	0.650714	0.234224
ENCFF959FMP	thymus	ID4_HS_SELEX_M5571_1	pwm	0.398836	0.632904	0.234068
ENCFF524XCQ	bipolar-neuron	E2A	kmer	0.391146	0.625046	0.2339
ENCFF711IJR	thymus	ID4_HS_SELEX_M5571_1	pwm	0.397632	0.631346	0.233714
ENCFF084LGH	dermis-blood-vessel-endothelial-cell	FLI1_HS_SELEX_M5431_1	pwm	0.581938	0.815402	0.233464
ENCFF711IJR	thymus	MESP1_HS_SELEX_M5627_1	pwm	0.395568	0.628664	0.233096
ENCFF878HVG	NAMALWA	MESP1_HS_SELEX_M5627_1	pwm	0.42293	0.655696	0.232766
ENCFF189LKP	thymus	E2A	kmer	0.415888	0.645046	0.229158
ENCFF797QID	muscle-of-back	ZBTB18_HS_SELEX_M5968_1	pwm	0.44238	0.671098	0.228718
ENCFF950DMO	bipolar-neuron	NEUROG2_HS_SELEX_M5653_1	pwm	0.465046	0.693052	0.228006
ENCFF880KWE	thymus	MESP1_HS_SELEX_M5627_1	pwm	0.398362	0.625592	0.22723
ENCFF495SEM	hematopoietic-multipotent-progenitor-cell	RUNX3_HS_SELEX_M5792_1	pwm	0.474148	0.700628	0.22648
ENCFF528GDM	brain	OLIG1_HS_SELEX_M5690_1	pwm	0.514382	0.73979	0.225408
ENCFF950DMO	bipolar-neuron	E2A	kmer	0.394346	0.61966	0.225314
ENCFF045UNP	dermis-blood-vessel-endothelial-cell	FLI1_HS_SELEX_M5431_1	pwm	0.592018	0.816708	0.22469
ENCFF925ZDU	NB4	RUNX3_HS_SELEX_M5792_1	pwm	0.496628	0.721036	0.224408
ENCFF663INK	CD8-positive_-alpha-beta-T-cell	RUNX3_HS_SELEX_M5792_1	pwm	0.49365	0.716696	0.223046
ENCFF855CMV	trophoblast-cell	GCM1_HS_SELEX_M5484_1	pwm	0.41853	0.641528	0.222998
ENCFF710SFP	NAMALWA	ID4_HS_SELEX_M5571_1	pwm	0.432864	0.655452	0.222588
ENCFF057PEY	astrocyte-of-the-cerebellum	RUNX3_HS_SELEX_M5792_1	pwm	0.519748	0.742244	0.222496
ENCFF911FIA	Karpas-422	MESP1_HS_SELEX_M5627_1	pwm	0.377004	0.599384	0.22238
ENCFF706BCL	body-of-pancreas	ID4_HS_SELEX_M5571_1	pwm	0.451336	0.673704	0.222368
ENCFF706BCL	body-of-pancreas	E2A	kmer	0.439688	0.661916	0.222228
ENCFF735JRV	pancreas	ID4_HS_SELEX_M5571_1	pwm	0.416708	0.63832	0.221612
ENCFF388FUA	common-myeloid-progenitor_-CD34-positive	RUNX3_HS_SELEX_M5792_1	pwm	0.492918	0.714338	0.22142
ENCFF711IJR	thymus	RUNX3_HS_SELEX_M5792_1	pwm	0.459802	0.681144	0.221342
ENCFF059VUS	common-myeloid-progenitor_-CD34-positive	RUNX3_HS_SELEX_M5792_1	pwm	0.510456	0.73175	0.221294
ENCFF696LIK	OCI-LY7	SNAI2_HS_SELEX_M5809_1	pwm	0.479696	0.700726	0.22103
ENCFF560YBU	brain	OLIG1_HS_SELEX_M5690_1	pwm	0.49672	0.717452	0.220732
ENCFF384AQH	KBM-7	FLI1_HS_SELEX_M5431_1	pwm	0.586714	0.807278	0.220564
ENCFF878HVG	NAMALWA	E2A	kmer	0.443926	0.663406	0.21948
ENCFF260PQV	OCI-LY7	ID4_HS_SELEX_M5571_1	pwm	0.4349	0.653962	0.219062
ENCFF797QID	muscle-of-back	E2A	kmer	0.39223	0.611156	0.218926
ENCFF393CAW	HFF-Myc	NEUROG2_HS_SELEX_M5653_1	pwm	0.510222	0.72888	0.218658
ENCFF854VIP	myotube	TCF3_HS_SELEX_M5900_1	pwm	0.398668	0.61732	0.218652
ENCFF259KDP	tongue	ZBTB18_HS_SELEX_M5968_1	pwm	0.454144	0.671262	0.217118
ENCFF959FMP	thymus	E2A	kmer	0.411782	0.628802	0.21702
ENCFF961JXL	thymus	TCF3_HS_SELEX_M5900_1	pwm	0.408908	0.625756	0.216848
ENCFF388FUA	common-myeloid-progenitor_-CD34-positive	FLI1_HS_SELEX_M5431_1	pwm	0.586216	0.802932	0.216716
ENCFF165ZIA	lung-microvascular-endothelial-cell	FLI1_HS_SELEX_M5431_1	pwm	0.557284	0.773776	0.216492
ENCFF524XCQ	bipolar-neuron	NEUROG2_HS_SELEX_M5653_1	pwm	0.478682	0.695084	0.216402
ENCFF711IJR	thymus	E2A	kmer	0.421536	0.636844	0.215308
ENCFF986DGM	hematopoietic-multipotent-progenitor-cell	FLI1_HS_SELEX_M5431_1	pwm	0.574436	0.78964	0.215204
ENCFF004PBJ	GM12865	RUNX3_HS_SELEX_M5792_1	pwm	0.49342	0.708288	0.214868
ENCFF897PRD	pancreas	ID4_HS_SELEX_M5571_1	pwm	0.427556	0.642272	0.214716
ENCFF421EQO	placenta	AP2	kmer	0.486134	0.700786	0.214652
ENCFF880KWE	thymus	ID4_HS_SELEX_M5571_1	pwm	0.415746	0.630384	0.214638
ENCFF735JRV	pancreas	E2A	kmer	0.428292	0.64209	0.213798
ENCFF094AUJ	adrenal-gland	ESR2_HS_HOCOMOCO_M6219_1	pwm	0.424166	0.637232	0.213066
ENCFF215UXZ	adrenal-gland	ESR2_HS_HOCOMOCO_M6219_1	pwm	0.411036	0.62291	0.211874
ENCFF502POZ	placenta	AP2	kmer	0.43498	0.646568	0.211588
ENCFF823QRP	dermis-blood-vessel-endothelial-cell	FLI1_HS_SELEX_M5431_1	pwm	0.583714	0.794728	0.211014
ENCFF674LBB	astrocyte-of-the-spinal-cord	RUNX3_HS_SELEX_M5792_1	pwm	0.473388	0.68412	0.210732
ENCFF171LSI	common-myeloid-progenitor_-CD34-positive	RUNX3_HS_SELEX_M5792_1	pwm	0.481904	0.692498	0.210594
ENCFF347YCV	muscle-of-leg	ZBTB18_HS_SELEX_M5968_1	pwm	0.443876	0.652988	0.209112
ENCFF081UUE	muscle-of-back	E2A	kmer	0.406942	0.61556	0.208618
ENCFF814UZW	tongue	ID4_HS_SELEX_M5571_1	pwm	0.40387	0.612056	0.208186
ENCFF375XEP	brain	OLIG1_HS_SELEX_M5690_1	pwm	0.50298	0.710742	0.207762
ENCFF321LTV	small-intestine	HNF4A_HS_SELEX_M5524_1	pwm	0.50356	0.71128	0.20772
ENCFF698ZFJ	astrocyte-of-the-hippocampus	RUNX3_HS_SELEX_M5792_1	pwm	0.456358	0.664006	0.207648
ENCFF880KWE	thymus	E2A	kmer	0.418574	0.625974	0.2074
ENCFF530CGM	brain	NEUROG2_HS_SELEX_M5653_1	pwm	0.468502	0.675836	0.207334
ENCFF897PRD	pancreas	MESP1_HS_SELEX_M5627_1	pwm	0.40828	0.615558	0.207278
ENCFF023ZMS	CD4-positive_-alpha-beta-T-cell	RUNX3_HS_SELEX_M5792_1	pwm	0.47819	0.685376	0.207186
ENCFF690DRM	left-lung	E2A	kmer	0.419816	0.626426	0.20661
ENCFF743UIM	common-myeloid-progenitor_-CD34-positive	RUNX3_HS_SELEX_M5792_1	pwm	0.501938	0.70776	0.205822
ENCFF911FIA	Karpas-422	EBF1_HS_SELEX_M5364_1	pwm	0.460196	0.66552	0.205324
ENCFF706BCL	body-of-pancreas	MESP1_HS_SELEX_M5627_1	pwm	0.432346	0.637456	0.20511
ENCFF961JXL	thymus	MESP1_HS_SELEX_M5627_1	pwm	0.41695	0.621844	0.204894
ENCFF460ZFL	lung-microvascular-endothelial-cell	FLI1_HS_SELEX_M5431_1	pwm	0.561144	0.765954	0.20481
ENCFF745COY	GM12865	RUNX3_HS_SELEX_M5792_1	pwm	0.472184	0.676738	0.204554
ENCFF601PAY	thymus	E2A	kmer	0.418804	0.623222	0.204418
ENCFF735JRV	pancreas	MESP1_HS_SELEX_M5627_1	pwm	0.409184	0.613548	0.204364
ENCFF109VIJ	CD8-positive_-alpha-beta-T-cell	RUNX3_HS_SELEX_M5792_1	pwm	0.52096	0.724758	0.203798
ENCFF128BFZ	placenta	AP2	kmer	0.534748	0.737912	0.203164
ENCFF448DSH	muscle-of-trunk	E2A	kmer	0.395136	0.598128	0.202992
ENCFF852FLF	thyroid-gland	HIC2_HS_SELEX_M5512_1	pwm	0.431924	0.634864	0.20294
ENCFF878HVG	NAMALWA	ID4_HS_SELEX_M5571_1	pwm	0.456022	0.658696	0.202674
ENCFF103UPI	brain	OLIG1_HS_SELEX_M5690_1	pwm	0.475638	0.677956	0.202318
ENCFF570PDT	hematopoietic-multipotent-progenitor-cell	RUNX3_HS_SELEX_M5792_1	pwm	0.472412	0.67462	0.202208
ENCFF794AMB	left-lung	E2A	kmer	0.406898	0.609104	0.202206
ENCFF024DAR	common-myeloid-progenitor_-CD34-positive	FLI1_HS_SELEX_M5431_1	pwm	0.59701	0.798822	0.201812
ENCFF530CGM	brain	NFIX_HS_SELEX_M5665_1	pwm	0.567184	0.768884	0.2017
ENCFF758SYE	gastrocnemius-medialis	TCF3_HS_SELEX_M5900_1	pwm	0.407242	0.608708	0.201466
ENCFF109RSW	CD4-positive_-alpha-beta-T-cell	RUNX3_HS_SELEX_M5792_1	pwm	0.46974	0.671054	0.201314
ENCFF512IML	CD8-positive_-alpha-beta-T-cell	RUNX3_HS_SELEX_M5792_1	pwm	0.480856	0.6821	0.201244
ENCFF024DAR	common-myeloid-progenitor_-CD34-positive	RUNX3_HS_SELEX_M5792_1	pwm	0.50206	0.702226	0.200166
ENCFF094AUJ	adrenal-gland	ESRR	kmer	0.494306	0.694238	0.199932
ENCFF814UZW	tongue	MYF6_MM_PBM_M0210_1	pwm	0.476474	0.6764	0.199926
ENCFF347YCV	muscle-of-leg	MYF6_MM_PBM_M0210_1	pwm	0.45326	0.653	0.19974
ENCFF957JQC	lung-microvascular-endothelial-cell	FLI1_HS_SELEX_M5431_1	pwm	0.619582	0.818796	0.199214
ENCFF191WFG	CD4-positive_-alpha-beta-T-cell	RUNX3_HS_SELEX_M5792_1	pwm	0.488858	0.688012	0.199154
ENCFF836ETB	muscle-of-trunk	E2A	kmer	0.400048	0.599022	0.198974
ENCFF562NMD	muscle-of-trunk	E2A	kmer	0.397978	0.596574	0.198596
ENCFF375XEP	brain	NFIX_HS_SELEX_M5665_1	pwm	0.59444	0.79276	0.19832
ENCFF216NXR	T-cell	RUNX3_HS_SELEX_M5792_1	pwm	0.500248	0.697708	0.19746
ENCFF347YCV	muscle-of-leg	E2A	kmer	0.403968	0.601334	0.197366
ENCFF332PPZ	muscle-of-arm	ZBTB18_HS_SELEX_M5968_1	pwm	0.457222	0.654224	0.197002
ENCFF304GVP	Jurkat-clone-E61	TCF3_HS_SELEX_M5900_1	pwm	0.470462	0.66712	0.196658
ENCFF366UHV	dermis-microvascular-lymphatic-vessel-endothelial-cell	FLI1_HS_SELEX_M5431_1	pwm	0.59377	0.790406	0.196636
ENCFF797QID	muscle-of-back	MYF6_MM_PBM_M0210_1	pwm	0.46687	0.66334	0.19647
ENCFF421EQO	placenta	TFAP2A_HS_SELEX_M5912_1	pwm	0.484824	0.68127	0.196446
ENCFF215UXZ	adrenal-gland	ESRR	kmer	0.473598	0.669414	0.195816
ENCFF557HFW	placenta	TEA	kmer	0.495518	0.690788	0.19527
ENCFF611CTG	muscle-of-arm	ZBTB18_HS_SELEX_M5968_1	pwm	0.468924	0.664018	0.195094
ENCFF061UBG	thymus	SNAI2_HS_SELEX_M5809_1	pwm	0.42809	0.622904	0.194814
ENCFF602XCK	naive-thymus-derived-CD4-positive_-alpha-beta-T-cell	RUNX3_HS_SELEX_M5792_1	pwm	0.507996	0.702756	0.19476
ENCFF384AQH	KBM-7	RUNX3_HS_SELEX_M5792_1	pwm	0.498146	0.692682	0.194536
ENCFF103UPI	brain	NEUROG2_HS_SELEX_M5653_1	pwm	0.484014	0.678382	0.194368
ENCFF814UZW	tongue	MESP1_HS_SELEX_M5627_1	pwm	0.405566	0.599854	0.194288
ENCFF986LLS	left-lung	E2A	kmer	0.387498	0.581482	0.193984
ENCFF097IKA	GM12864	RUNX3_HS_SELEX_M5792_1	pwm	0.48626	0.679694	0.193434
ENCFF259KDP	tongue	NEUROG2_HS_SELEX_M5653_1	pwm	0.472854	0.666164	0.19331
ENCFF128BFZ	placenta	TFAP2A_HS_SELEX_M5912_1	pwm	0.522378	0.715642	0.193264
ENCFF663LIJ	left-lung	MYF6_MM_PBM_M0210_1	pwm	0.482128	0.675222	0.193094
ENCFF542RWT	muscle-of-leg	E2A	kmer	0.426296	0.619346	0.19305
ENCFF920DDN	large-intestine	ESR2_HS_HOCOMOCO_M6219_1	pwm	0.408748	0.601586	0.192838
ENCFF855CMV	trophoblast-cell	GCM	kmer	0.473204	0.665762	0.192558
ENCFF557HFW	placenta	TEAD1_HS_SELEX_M5904_1	pwm	0.541366	0.733768	0.192402
ENCFF524XCQ	bipolar-neuron	MYF6_MM_PBM_M0210_1	pwm	0.464708	0.656956	0.192248
ENCFF307VFD	muscle-of-arm	E2A	kmer	0.390534	0.58234	0.191806
ENCFF502POZ	placenta	TFAP2A_HS_SELEX_M5912_1	pwm	0.435096	0.626712	0.191616
ENCFF840ZTK	natural-killer-cell	RUNX3_HS_SELEX_M5792_1	pwm	0.517398	0.70901	0.191612
ENCFF375XEP	brain	HIC2_HS_SELEX_M5512_1	pwm	0.434748	0.626274	0.191526
ENCFF711VFJ	muscle-of-arm	ZBTB18_HS_SELEX_M5968_1	pwm	0.474	0.665418	0.191418
ENCFF897PRD	pancreas	E2A	kmer	0.440454	0.6318	0.191346
ENCFF601PAY	thymus	ID4_HS_SELEX_M5571_1	pwm	0.445938	0.636774	0.190836
ENCFF547UCK	T-cell	RUNX3_HS_SELEX_M5792_1	pwm	0.492726	0.683542	0.190816
ENCFF854VIP	myotube	E2A	kmer	0.453708	0.64388	0.190172
ENCFF195KNE	T-helper-1-cell	FLI1_HS_SELEX_M5431_1	pwm	0.581472	0.771502	0.19003
ENCFF606XQS	dermis-microvascular-lymphatic-vessel-endothelial-cell	FLI1_HS_SELEX_M5431_1	pwm	0.595478	0.784906	0.189428
ENCFF040LTQ	WERI-Rb-1	OTX1_HS_SELEX_M5699_1	pwm	0.609256	0.798572	0.189316
ENCFF081UUE	muscle-of-back	ZBTB18_HS_SELEX_M5968_1	pwm	0.454294	0.643488	0.189194
ENCFF929VDK	common-myeloid-progenitor_-CD34-positive	RUNX3_HS_SELEX_M5792_1	pwm	0.52694	0.715524	0.188584
ENCFF897PRD	pancreas	SNAI2_HS_SELEX_M5809_1	pwm	0.459018	0.647506	0.188488
ENCFF984RKH	thymus	SNAI2_HS_SELEX_M5809_1	pwm	0.428606	0.617076	0.18847
ENCFF663LIJ	left-lung	TCF3_HS_SELEX_M5900_1	pwm	0.42025	0.608674	0.188424
ENCFF842ESG	HFF-Myc	NEUROG2_HS_SELEX_M5653_1	pwm	0.5469	0.735198	0.188298
ENCFF704WQC	myotube	MYF6_MM_PBM_M0210_1	pwm	0.501674	0.689532	0.187858
ENCFF207IYJ	brain	RFX4primary_MM_PBM	pwm	0.499344	0.687196	0.187852
ENCFF307VFD	muscle-of-arm	NFAT	kmer	0.507034	0.694702	0.187668
ENCFF061UBG	thymus	TBX5_MM_PBM_M1627_1	pwm	0.411324	0.598614	0.18729
ENCFF572RTJ	muscle-of-leg	E2A	kmer	0.407718	0.59447	0.186752
ENCFF084LGH	dermis-blood-vessel-endothelial-cell	ETS	kmer	0.59506	0.781704	0.186644
ENCFF409QXF	heart-left-ventricle	MEF2A_HS_SELEX_M5615_1	pwm	0.509844	0.69645	0.186606
ENCFF542RWT	muscle-of-leg	ZBTB18_HS_SELEX_M5968_1	pwm	0.463104	0.649552	0.186448
ENCFF136FZU	right-lung	E2A	kmer	0.422962	0.609308	0.186346
ENCFF171LSI	common-myeloid-progenitor_-CD34-positive	FLI1_HS_SELEX_M5431_1	pwm	0.583578	0.769896	0.186318
ENCFF725QIG	common-myeloid-progenitor_-CD34-positive	FLI1_HS_SELEX_M5431_1	pwm	0.59991	0.786224	0.186314
ENCFF878LVP	dermis-microvascular-lymphatic-vessel-endothelial-cell	FLI1_HS_SELEX_M5431_1	pwm	0.619126	0.805324	0.186198
ENCFF230WCV	brain	E2A	kmer	0.411408	0.597402	0.185994
ENCFF474MZJ	muscle-of-back	E2A	kmer	0.40804	0.594	0.18596
ENCFF046QJY	right-lung	ZBTB18_HS_SELEX_M5968_1	pwm	0.463994	0.649024	0.18503
ENCFF520HRA	H7	ZIC1_HS_SELEX_M5963_1	pwm	0.498854	0.683818	0.184964
ENCFF856BCY	common-myeloid-progenitor_-CD34-positive	RUNX3_HS_SELEX_M5792_1	pwm	0.54377	0.72872	0.18495
ENCFF735JRV	pancreas	SNAI2_HS_SELEX_M5809_1	pwm	0.453728	0.638556	0.184828
ENCFF663LIJ	left-lung	E2A	kmer	0.442938	0.627714	0.184776
ENCFF847WTW	muscle-of-back	E2A	kmer	0.412822	0.597516	0.184694
ENCFF393CAW	HFF-Myc	OLIG1_HS_SELEX_M5690_1	pwm	0.518296	0.702868	0.184572
ENCFF384AQH	KBM-7	ETS	kmer	0.61391	0.798402	0.184492
ENCFF822FIY	hematopoietic-multipotent-progenitor-cell	GATA6_MM_PBM_M0782_1	pwm	0.639962	0.824454	0.184492
ENCFF045UNP	dermis-blood-vessel-endothelial-cell	ETS	kmer	0.60388	0.78832	0.18444
ENCFF663LIJ	left-lung	ZBTB18_HS_SELEX_M5968_1	pwm	0.469348	0.653756	0.184408
ENCFF674ZTX	muscle-of-leg	ZBTB18_HS_SELEX_M5968_1	pwm	0.473072	0.65746	0.184388
ENCFF470QNA	muscle-of-leg	ZBTB18_HS_SELEX_M5968_1	pwm	0.46061	0.64476	0.18415
ENCFF794AMB	left-lung	MYF6_MM_PBM_M0210_1	pwm	0.48583	0.66945	0.18362
ENCFF688ZSR	Jurkat-clone-E61	TCF3_HS_SELEX_M5900_1	pwm	0.421266	0.604528	0.183262
ENCFF743UIM	common-myeloid-progenitor_-CD34-positive	FLI1_HS_SELEX_M5431_1	pwm	0.602972	0.78601	0.183038
ENCFF814UZW	tongue	ZBTB18_HS_SELEX_M5968_1	pwm	0.471064	0.65407	0.183006
ENCFF304GVP	Jurkat-clone-E61	E2A	kmer	0.47772	0.660372	0.182652
ENCFF365XCB	Karpas-422	EBF1_HS_SELEX_M5364_1	pwm	0.48492	0.667204	0.182284
ENCFF712AKP	lung	ZBTB18_HS_SELEX_M5968_1	pwm	0.452048	0.634326	0.182278
ENCFF734QSB	dermis-microvascular-lymphatic-vessel-endothelial-cell	FLI1_HS_SELEX_M5431_1	pwm	0.622814	0.805046	0.182232
ENCFF837KHA	muscle-of-arm	E2A	kmer	0.416106	0.59808	0.181974
ENCFF243LFH	lung	E2A	kmer	0.41511	0.596988	0.181878
ENCFF850STV	forelimb-muscle	ZBTB18_HS_SELEX_M5968_1	pwm	0.47816	0.65992	0.18176
ENCFF836ETB	muscle-of-trunk	ZBTB18_HS_SELEX_M5968_1	pwm	0.461856	0.643612	0.181756
ENCFF196VQQ	large-intestine	HNF4A_HS_SELEX_M5524_1	pwm	0.49742	0.679144	0.181724
ENCFF304GVP	Jurkat-clone-E61	MESP1_HS_SELEX_M5627_1	pwm	0.46926	0.650902	0.181642
ENCFF847WTW	muscle-of-back	MYF6_MM_PBM_M0210_1	pwm	0.457756	0.639314	0.181558
ENCFF040LTQ	WERI-Rb-1	PITX	kmer	0.588124	0.769666	0.181542
ENCFF588SBI	muscle-of-arm	ZBTB18_HS_SELEX_M5968_1	pwm	0.44793	0.62936	0.18143
ENCFF854VIP	myotube	ID4_HS_SELEX_M5571_1	pwm	0.41997	0.601322	0.181352
ENCFF847WTW	muscle-of-back	ZBTB18_HS_SELEX_M5968_1	pwm	0.459198	0.640536	0.181338
ENCFF144XMY	T-helper-2-cell	ELF1_HS_SELEX_M5373_1	pwm	0.555372	0.73664	0.181268
ENCFF564SMU	small-intestine	HNF4A_HS_SELEX_M5524_1	pwm	0.49726	0.678392	0.181132
ENCFF502POZ	placenta	TEAD1_HS_SELEX_M5904_1	pwm	0.489922	0.670206	0.180284
ENCFF794AMB	left-lung	ZBTB18_HS_SELEX_M5968_1	pwm	0.453996	0.63419	0.180194
ENCFF446FTN	lung-microvascular-endothelial-cell	FLI1_HS_SELEX_M5431_1	pwm	0.620932	0.800922	0.17999
ENCFF542RWT	muscle-of-leg	MYF6_MM_PBM_M0210_1	pwm	0.46978	0.649618	0.179838
ENCFF230CHA	lung	E2A	kmer	0.427748	0.60743	0.179682
ENCFF419NYS	dermis-blood-vessel-endothelial-cell	FLI1_HS_SELEX_M5431_1	pwm	0.645122	0.824756	0.179634
ENCFF888NOP	muscle-of-arm	ZBTB18_HS_SELEX_M5968_1	pwm	0.456572	0.63619	0.179618
ENCFF674ZTX	muscle-of-leg	E2A	kmer	0.42341	0.602352	0.178942
ENCFF588SBI	muscle-of-arm	MYF6_MM_PBM_M0210_1	pwm	0.455262	0.633818	0.178556
ENCFF725QIG	common-myeloid-progenitor_-CD34-positive	RUNX3_HS_SELEX_M5792_1	pwm	0.529682	0.708014	0.178332
ENCFF409QXF	heart-left-ventricle	MEF2B_HS_SELEX_M5616_1	pwm	0.507416	0.685642	0.178226
ENCFF614FYH	dermis-blood-vessel-endothelial-cell	ETS	kmer	0.589674	0.767772	0.178098
ENCFF046QJY	right-lung	E2A	kmer	0.448554	0.626544	0.17799
ENCFF609KNI	muscle-of-leg	ZBTB18_HS_SELEX_M5968_1	pwm	0.453096	0.63084	0.177744
ENCFF267VKD	CD1c-positive-myeloid-dendritic-cell	ETSIII	kmer	0.54166	0.719366	0.177706
ENCFF081UUE	muscle-of-back	MYF6_MM_PBM_M0210_1	pwm	0.46392	0.641544	0.177624
ENCFF365IGK	common-myeloid-progenitor_-CD34-positive	RUNX3_HS_SELEX_M5792_1	pwm	0.548114	0.725202	0.177088
ENCFF097LEF	GM12878	RUNX3_HS_SELEX_M5792_1	pwm	0.505448	0.682346	0.176898
ENCFF562NMD	muscle-of-trunk	ZBTB18_HS_SELEX_M5968_1	pwm	0.459232	0.636108	0.176876
ENCFF926OPP	CD8-positive_-alpha-beta-T-cell	RUNX3_HS_SELEX_M5792_1	pwm	0.501942	0.678726	0.176784
ENCFF012QDX	T-helper-1-cell	FLI1_HS_SELEX_M5431_1	pwm	0.64588	0.822628	0.176748
ENCFF276FKY	large-intestine	THRA_HS_HOKOMOKO_M6521_1	pwm	0.39674	0.573484	0.176744
ENCFF570PDT	hematopoietic-multipotent-progenitor-cell	FLI1_HS_SELEX_M5431_1	pwm	0.579512	0.75625	0.176738
ENCFF110CYC	common-myeloid-progenitor_-CD34-positive	RUNX3_HS_SELEX_M5792_1	pwm	0.54357	0.720278	0.176708
ENCFF540HZS	muscle-of-back	ZBTB18_HS_SELEX_M5968_1	pwm	0.44914	0.62568	0.17654
ENCFF525FRH	adrenal-gland	ESR2_HS_HOCOMOCO_M6219_1	pwm	0.414508	0.5907	0.176192
ENCFF957JQC	lung-microvascular-endothelial-cell	ETS	kmer	0.617506	0.793654	0.176148
ENCFF393CAW	HFF-Myc	ZBTB18_HS_SELEX_M5968_1	pwm	0.492806	0.668934	0.176128
ENCFF854VIP	myotube	MYF6_MM_PBM_M0210_1	pwm	0.511832	0.68779	0.175958
ENCFF375XEP	brain	HIC1	kmer	0.48721	0.663014	0.175804
ENCFF059VUS	common-myeloid-progenitor_-CD34-positive	FLI1_HS_SELEX_M5431_1	pwm	0.618284	0.794054	0.17577
ENCFF805JKJ	large-intestine	HNF4A_HS_SELEX_M5524_1	pwm	0.523988	0.699678	0.17569
ENCFF307VFD	muscle-of-arm	ZBTB18_HS_SELEX_M5968_1	pwm	0.462434	0.638104	0.17567
ENCFF625XNX	lung	ZBTB18_HS_SELEX_M5968_1	pwm	0.451232	0.626648	0.175416
ENCFF696LIK	OCI-LY7	TBX5_MM_PBM_M1627_1	pwm	0.443398	0.6188	0.175402
ENCFF230CHA	lung	ZBTB18_HS_SELEX_M5968_1	pwm	0.45993	0.63532	0.17539
ENCFF911FIA	Karpas-422	ID4_HS_SELEX_M5571_1	pwm	0.409918	0.585038	0.17512
ENCFF625XNX	lung	E2A	kmer	0.405178	0.580236	0.175058
ENCFF303THQ	brain	RFX4primary_MM_PBM	pwm	0.5386	0.71347	0.17487
ENCFF338UFC	CD4-positive_-alpha-beta-T-cell	RUNX3_HS_SELEX_M5792_1	pwm	0.515934	0.6908	0.174866
ENCFF483RJF	T-helper-17-cell	FLI1_HS_SELEX_M5431_1	pwm	0.630322	0.805176	0.174854
ENCFF332PPZ	muscle-of-arm	MYF6_MM_PBM_M0210_1	pwm	0.464052	0.638848	0.174796
ENCFF562NMD	muscle-of-trunk	MYF6_MM_PBM_M0210_1	pwm	0.45273	0.627498	0.174768
ENCFF130KKE	left-lung	E2A	kmer	0.410364	0.584822	0.174458
ENCFF566SXQ	CD8-positive_-alpha-beta-T-cell	RUNX3_HS_SELEX_M5792_1	pwm	0.471176	0.645552	0.174376
ENCFF268UJI	smooth-muscle-cell-of-the-brain-vasculature	ZIC1_HS_SELEX_M5963_1	pwm	0.466408	0.64057	0.174162
ENCFF663DTX	large-intestine	HNF4A_HS_SELEX_M5524_1	pwm	0.505446	0.67929	0.173844
ENCFF171JLD	muscle-of-back	ZBTB18_HS_SELEX_M5968_1	pwm	0.449484	0.623146	0.173662
ENCFF794AMB	left-lung	NEUROG2_HS_SELEX_M5653_1	pwm	0.464732	0.63835	0.173618
ENCFF623AFX	K562	GATA	kmer	0.51306	0.686588	0.173528
ENCFF880QTT	placenta	TFAP2A_HS_SELEX_M5912_1	pwm	0.428036	0.601484	0.173448
ENCFF975JLM	right-lung	E2A	kmer	0.4149	0.58828	0.17338
ENCFF588SBI	muscle-of-arm	E2A	kmer	0.40652	0.57974	0.17322
ENCFF711VFJ	muscle-of-arm	E2A	kmer	0.43475	0.607928	0.173178
ENCFF836ETB	muscle-of-trunk	MYF6_MM_PBM_M0210_1	pwm	0.46874	0.641838	0.173098
ENCFF852NHM	T-helper-2-cell	FLI1_HS_SELEX_M5431_1	pwm	0.581964	0.75502	0.173056
ENCFF945DQY	left-lung	ZBTB18_HS_SELEX_M5968_1	pwm	0.453824	0.626708	0.172884
ENCFF332PPZ	muscle-of-arm	E2A	kmer	0.428254	0.601046	0.172792
ENCFF986LLS	left-lung	MYF6_MM_PBM_M0210_1	pwm	0.466334	0.638954	0.17262
ENCFF502POZ	placenta	TEA	kmer	0.47362	0.646214	0.172594
ENCFF601PAY	thymus	RUNX3_HS_SELEX_M5792_1	pwm	0.483088	0.655534	0.172446
ENCFF950DMO	bipolar-neuron	OLIG1_HS_SELEX_M5690_1	pwm	0.491574	0.663994	0.17242
ENCFF659BCP	muscle-of-leg	ZBTB18_HS_SELEX_M5968_1	pwm	0.45797	0.63024	0.17227
ENCFF560YBU	brain	NFIX_HS_SELEX_M5665_1	pwm	0.60384	0.776046	0.172206
ENCFF391BRB	lung	TCF3_HS_SELEX_M5900_1	pwm	0.441048	0.61322	0.172172
ENCFF218ZFS	brain	RFX4primary_MM_PBM	pwm	0.5335	0.705592	0.172092
ENCFF945DQY	left-lung	E2A	kmer	0.407202	0.579178	0.171976
ENCFF230WCV	brain	NFIX_HS_SELEX_M5665_1	pwm	0.588206	0.760114	0.171908
ENCFF474MZJ	muscle-of-back	ZBTB18_HS_SELEX_M5968_1	pwm	0.474874	0.646602	0.171728
ENCFF857LHK	right-lung	MYF6_MM_PBM_M0210_1	pwm	0.459258	0.630968	0.17171
ENCFF961JXL	thymus	E2A	kmer	0.440892	0.612476	0.171584
ENCFF457XYZ	brain	HIC2_HS_SELEX_M5512_1	pwm	0.402794	0.574374	0.17158
ENCFF284MUO	muscle-of-back	E2A	kmer	0.416476	0.587928	0.171452
ENCFF986LLS	left-lung	ZBTB18_HS_SELEX_M5968_1	pwm	0.441996	0.61344	0.171444
ENCFF659BCP	muscle-of-leg	E2A	kmer	0.41765	0.589082	0.171432
ENCFF986LLS	left-lung	NEUROG2_HS_SELEX_M5653_1	pwm	0.451956	0.623284	0.171328
ENCFF721SJU	hematopoietic-multipotent-progenitor-cell	RUNX3_HS_SELEX_M5792_1	pwm	0.443302	0.614594	0.171292
ENCFF986DGM	hematopoietic-multipotent-progenitor-cell	E2A	kmer	0.4047	0.575756	0.171056
ENCFF428OZI	right-lung	E2A	kmer	0.416132	0.58711	0.170978
ENCFF758SYE	gastrocnemius-medialis	ID4_HS_SELEX_M5571_1	pwm	0.434418	0.605158	0.17074
ENCFF321LTV	small-intestine	ESR2_HS_HOCOMOCO_M6219_1	pwm	0.427594	0.598184	0.17059
ENCFF276FKY	large-intestine	HNF4A_HS_SELEX_M5524_1	pwm	0.495216	0.66576	0.170544
ENCFF959FMP	thymus	SNAI2_HS_SELEX_M5809_1	pwm	0.419534	0.59003	0.170496
ENCFF690DRM	left-lung	MYF6_MM_PBM_M0210_1	pwm	0.494076	0.66455	0.170474
ENCFF136FZU	right-lung	ZBTB18_HS_SELEX_M5968_1	pwm	0.46314	0.633552	0.170412
ENCFF950DMO	bipolar-neuron	MYF6_MM_PBM_M0210_1	pwm	0.484746	0.654904	0.170158
ENCFF041CSB	NB4	RUNX3_HS_SELEX_M5792_1	pwm	0.530624	0.700558	0.169934
ENCFF837KHA	muscle-of-arm	ZBTB18_HS_SELEX_M5968_1	pwm	0.481928	0.651816	0.169888
ENCFF284QST	muscle-of-back	E2A	kmer	0.394526	0.564372	0.169846
ENCFF261BTV	muscle-of-back	E2A	kmer	0.412418	0.582222	0.169804
ENCFF540HZS	muscle-of-back	E2A	kmer	0.399138	0.568896	0.169758
ENCFF401SKP	muscle-of-leg	ZBTB18_HS_SELEX_M5968_1	pwm	0.485248	0.654862	0.169614
ENCFF094AUJ	adrenal-gland	THRA_HS_HOKOMOKO_M6521_1	pwm	0.437792	0.606852	0.16906
ENCFF679MSO	retina	Hbox-II	kmer	0.50606	0.67502	0.16896
ENCFF941FIK	small-intestine	HNF4A_HS_SELEX_M5524_1	pwm	0.495186	0.664136	0.16895
ENCFF470QNA	muscle-of-leg	E2A	kmer	0.42244	0.591326	0.168886
ENCFF758SYE	gastrocnemius-medialis	E2A	kmer	0.435996	0.604598	0.168602
ENCFF040LTQ	WERI-Rb-1	NEUROG2_HS_SELEX_M5653_1	pwm	0.524988	0.693542	0.168554
ENCFF559HGO	small-intestine	ESR2_HS_HOCOMOCO_M6219_1	pwm	0.403946	0.572466	0.16852
ENCFF733JSK	hematopoietic-multipotent-progenitor-cell	RUNX3_HS_SELEX_M5792_1	pwm	0.443114	0.61155	0.168436
ENCFF888NOP	muscle-of-arm	MYF6_MM_PBM_M0210_1	pwm	0.453846	0.62227	0.168424
ENCFF654MRJ	T-helper-1-cell	FLI1_HS_SELEX_M5431_1	pwm	0.613204	0.781474	0.16827
ENCFF307VFD	muscle-of-arm	MYF6_MM_PBM_M0210_1	pwm	0.458092	0.626362	0.16827
ENCFF530CGM	brain	OLIG1_HS_SELEX_M5690_1	pwm	0.486878	0.65506	0.168182
ENCFF241GBQ	hematopoietic-multipotent-progenitor-cell	FLI1_HS_SELEX_M5431_1	pwm	0.607648	0.77578	0.168132
ENCFF945DQY	left-lung	MYF6_MM_PBM_M0210_1	pwm	0.469186	0.637226	0.16804
ENCFF625XNX	lung	MYF6_MM_PBM_M0210_1	pwm	0.467916	0.635956	0.16804
ENCFF630VNL	muscle-of-leg	E2A	kmer	0.406498	0.574348	0.16785
ENCFF712AKP	lung	E2A	kmer	0.437446	0.605116	0.16767
ENCFF662JPI	astrocyte-of-the-hippocampus	RUNX3_HS_SELEX_M5792_1	pwm	0.502504	0.669944	0.16744
ENCFF782LZX	L1-S8R	SOX4_HS_PBM_M1578_1	pwm	0.498698	0.665612	0.166914
ENCFF880KWE	thymus	SNAI2_HS_SELEX_M5809_1	pwm	0.418194	0.585092	0.166898
ENCFF572RTJ	muscle-of-leg	ZBTB18_HS_SELEX_M5968_1	pwm	0.477234	0.64407	0.166836
ENCFF560YBU	brain	HIC1	kmer	0.47038	0.637152	0.166772
ENCFF136FZU	right-lung	MYF6_MM_PBM_M0210_1	pwm	0.471824	0.638458	0.166634
ENCFF505KHS	HL-60	CEBP	kmer	0.578068	0.744668	0.1666
ENCFF687FIQ	heart-right-ventricle	MEF2A_HS_SELEX_M5615_1	pwm	0.48998	0.656492	0.166512
ENCFF735APJ	lung	E2A	kmer	0.415738	0.582158	0.16642
ENCFF609KNI	muscle-of-leg	MYF6_MM_PBM_M0210_1	pwm	0.462354	0.62858	0.166226
ENCFF674ZTX	muscle-of-leg	MYF6_MM_PBM_M0210_1	pwm	0.479872	0.645804	0.165932
ENCFF961JXL	thymus	ID4_HS_SELEX_M5571_1	pwm	0.454578	0.620478	0.1659
ENCFF611CTG	muscle-of-arm	E2A	kmer	0.42834	0.594142	0.165802
ENCFF711VFJ	muscle-of-arm	MYF6_MM_PBM_M0210_1	pwm	0.476506	0.642308	0.165802
ENCFF059HII	left-lung	E2A	kmer	0.422414	0.58814	0.165726
ENCFF525FRH	adrenal-gland	ESRR	kmer	0.493278	0.658994	0.165716
ENCFF130KKE	left-lung	MYF6_MM_PBM_M0210_1	pwm	0.467894	0.633572	0.165678
ENCFF215UXZ	adrenal-gland	THRA_HS_HOKOMOKO_M6521_1	pwm	0.433202	0.59884	0.165638
ENCFF854EJY	common-myeloid-progenitor_-CD34-positive	E2A	kmer	0.404322	0.569896	0.165574
ENCFF524XCQ	bipolar-neuron	OLIG1_HS_SELEX_M5690_1	pwm	0.50128	0.666848	0.165568
ENCFF962IGI	skeletal-muscle-myoblast	MYF6_MM_PBM_M0210_1	pwm	0.518472	0.684	0.165528
ENCFF365XCB	Karpas-422	AP2	kmer	0.432342	0.597496	0.165154
ENCFF679HWR	large-intestine	HNF4A_HS_SELEX_M5524_1	pwm	0.506204	0.67119	0.164986
ENCFF911FIA	Karpas-422	E2A	kmer	0.41305	0.577862	0.164812
ENCFF751OEX	small-intestine	HNF4A_HS_SELEX_M5524_1	pwm	0.511222	0.675992	0.16477
ENCFF036PGY	right-lung	E2A	kmer	0.429036	0.593666	0.16463
ENCFF880KWE	thymus	RUNX3_HS_SELEX_M5792_1	pwm	0.461818	0.626372	0.164554
ENCFF688ZSR	Jurkat-clone-E61	MESP1_HS_SELEX_M5627_1	pwm	0.419398	0.58394	0.164542
ENCFF414BFO	muscle-of-back	ZBTB18_HS_SELEX_M5968_1	pwm	0.451436	0.61592	0.164484
ENCFF696LIK	OCI-LY7	MYF6_MM_PBM_M0210_1	pwm	0.484164	0.648636	0.164472
ENCFF856BCY	common-myeloid-progenitor_-CD34-positive	MESP1_HS_SELEX_M5627_1	pwm	0.422484	0.586668	0.164184
ENCFF004PBJ	GM12865	IRF	kmer	0.527724	0.69186	0.164136
ENCFF836DBU	cardiovascular-progenitor-cell	GATA6_MM_PBM_M0782_1	pwm	0.579044	0.74316	0.164116
ENCFF230WCV	brain	HIC2_HS_SELEX_M5512_1	pwm	0.446296	0.6104	0.164104
ENCFF842ESG	HFF-Myc	OLIG1_HS_SELEX_M5690_1	pwm	0.53635	0.700452	0.164102
ENCFF289XSM	CD14-positive-monocyte	ETSIII	kmer	0.530752	0.694852	0.1641
ENCFF672BMB	mammary-epithelial-cell	JUND_HS_SELEX_M0320_1	pwm	0.54996	0.714024	0.164064
ENCFF428OZI	right-lung	MYF6_MM_PBM_M0210_1	pwm	0.451124	0.615082	0.163958
ENCFF986DGM	hematopoietic-multipotent-progenitor-cell	ETS	kmer	0.603242	0.767136	0.163894
ENCFF663LIJ	left-lung	MESP1_HS_SELEX_M5627_1	pwm	0.427712	0.591576	0.163864
ENCFF319CPJ	muscle-of-leg	ZBTB18_HS_SELEX_M5968_1	pwm	0.462568	0.62625	0.163682
ENCFF523TKA	muscle-of-arm	E2A	kmer	0.399422	0.563054	0.163632
ENCFF527EJQ	epithelial-cell-of-esophagus	P53_HS_SELEX_M6105_1	pwm	0.563076	0.726704	0.163628
ENCFF097KBE	endothelial-cell-of-umbilical-vein	FLI1_HS_SELEX_M5431_1	pwm	0.599904	0.763514	0.16361
ENCFF365XCB	Karpas-422	MESP1_HS_SELEX_M5627_1	pwm	0.419712	0.583266	0.163554
ENCFF276FKY	large-intestine	ESR2_HS_HOCOMOCO_M6219_1	pwm	0.410898	0.574434	0.163536
ENCFF674ZTX	muscle-of-leg	NEUROG2_HS_SELEX_M5653_1	pwm	0.463974	0.627476	0.163502
ENCFF448DSH	muscle-of-trunk	MYF6_MM_PBM_M0210_1	pwm	0.460428	0.623698	0.16327
ENCFF614FYH	dermis-blood-vessel-endothelial-cell	ELF1_HS_SELEX_M5373_1	pwm	0.531712	0.694924	0.163212
ENCFF599BMR	small-intestine	HNF4A_HS_SELEX_M5524_1	pwm	0.51161	0.674672	0.163062
ENCFF710SFP	NAMALWA	MYF6_MM_PBM_M0210_1	pwm	0.46255	0.625524	0.162974
ENCFF687FIQ	heart-right-ventricle	MEF2B_HS_SELEX_M5616_1	pwm	0.498	0.660816	0.162816
ENCFF711IJR	thymus	SNAI2_HS_SELEX_M5809_1	pwm	0.415798	0.57843	0.162632
ENCFF827RCC	left-lung	E2A	kmer	0.43884	0.601398	0.162558
ENCFF391BRB	lung	E2A	kmer	0.46244	0.62489	0.16245
ENCFF401SKP	muscle-of-leg	E2A	kmer	0.436704	0.599148	0.162444
ENCFF494EIC	large-intestine	HNF4A_HS_SELEX_M5524_1	pwm	0.492922	0.65512	0.162198
ENCFF110CYC	common-myeloid-progenitor_-CD34-positive	FLI1_HS_SELEX_M5431_1	pwm	0.640896	0.802918	0.162022
ENCFF457XYZ	brain	NEUROG2_HS_SELEX_M5653_1	pwm	0.448614	0.610624	0.16201
ENCFF437IAA	CMK	GATA	kmer	0.555098	0.717028	0.16193
ENCFF319CPJ	muscle-of-leg	E2A	kmer	0.43114	0.59302	0.16188
ENCFF331KXA	brain	RFX4primary_MM_PBM	pwm	0.51794	0.679724	0.161784
ENCFF045UNP	dermis-blood-vessel-endothelial-cell	ELF1_HS_SELEX_M5373_1	pwm	0.558282	0.72	0.161718
ENCFF284MUO	muscle-of-back	ZBTB18_HS_SELEX_M5968_1	pwm	0.469668	0.631368	0.1617
ENCFF388FUA	common-myeloid-progenitor_-CD34-positive	E2A	kmer	0.419694	0.581318	0.161624
ENCFF005DMK	placenta	TEAD1_HS_SELEX_M5904_1	pwm	0.476066	0.6376	0.161534
ENCFF850STV	forelimb-muscle	NFAT	kmer	0.500362	0.661894	0.161532
ENCFF094AUJ	adrenal-gland	JUND_HS_SELEX_M0320_1	pwm	0.56644	0.727914	0.161474
ENCFF326SSU	muscle-of-arm	ZBTB18_HS_SELEX_M5968_1	pwm	0.469452	0.630802	0.16135
ENCFF927KUT	glomerular-endothelial-cell	FLI1_HS_SELEX_M5431_1	pwm	0.655144	0.81647	0.161326
ENCFF805JKJ	large-intestine	ESR2_HS_HOCOMOCO_M6219_1	pwm	0.434304	0.595556	0.161252
ENCFF829ZEZ	adrenal-gland	ESRR	kmer	0.480572	0.641708	0.161136
ENCFF437IAA	CMK	RUNX3_HS_SELEX_M5792_1	pwm	0.511014	0.672062	0.161048
ENCFF375XEP	brain	NFIA_HS_SELEX_M5661_1	pwm	0.528974	0.689982	0.161008
ENCFF103UPI	brain	NFIX_HS_SELEX_M5665_1	pwm	0.57076	0.731706	0.160946
ENCFF384AQH	KBM-7	ETSIII	kmer	0.547094	0.70781	0.160716
ENCFF602XCK	naive-thymus-derived-CD4-positive_-alpha-beta-T-cell	FLI1_HS_SELEX_M5431_1	pwm	0.587762	0.748382	0.16062
ENCFF856BCY	common-myeloid-progenitor_-CD34-positive	FLI1_HS_SELEX_M5431_1	pwm	0.65865	0.819192	0.160542
ENCFF388FUA	common-myeloid-progenitor_-CD34-positive	NEUROG2_HS_SELEX_M5653_1	pwm	0.462162	0.622662	0.1605
ENCFF663LIJ	left-lung	NEUROG2_HS_SELEX_M5653_1	pwm	0.501498	0.661978	0.16048
ENCFF260PQV	OCI-LY7	SNAI2_HS_SELEX_M5809_1	pwm	0.444768	0.60501	0.160242
ENCFF850STV	forelimb-muscle	MYF6_MM_PBM_M0210_1	pwm	0.49251	0.652656	0.160146
ENCFF061UBG	thymus	MYF6_MM_PBM_M0210_1	pwm	0.45784	0.617954	0.160114
ENCFF850STV	forelimb-muscle	E2A	kmer	0.446024	0.606122	0.160098
ENCFF666SXY	thyroid-gland	HIC2_HS_SELEX_M5512_1	pwm	0.454648	0.61471	0.160062
ENCFF103UPI	brain	E2A	kmer	0.405176	0.56521	0.160034
ENCFF854EJY	common-myeloid-progenitor_-CD34-positive	FLI1_HS_SELEX_M5431_1	pwm	0.631772	0.791772	0.16
ENCFF837KHA	muscle-of-arm	MYF6_MM_PBM_M0210_1	pwm	0.492902	0.652862	0.15996
ENCFF611CTG	muscle-of-arm	MYF6_MM_PBM_M0210_1	pwm	0.487844	0.647752	0.159908
ENCFF679MSO	retina	Hbox-III	kmer	0.513382	0.673288	0.159906
ENCFF528GDM	brain	NFIX_HS_SELEX_M5665_1	pwm	0.587744	0.747622	0.159878
ENCFF957JQC	lung-microvascular-endothelial-cell	ELF1_HS_SELEX_M5373_1	pwm	0.571816	0.73169	0.159874
ENCFF133ILP	T-cell	RUNX3_HS_SELEX_M5792_1	pwm	0.530064	0.689902	0.159838
ENCFF311LCN	muscle-of-arm	E2A	kmer	0.411946	0.571772	0.159826
ENCFF888NOP	muscle-of-arm	E2A	kmer	0.420606	0.580354	0.159748
ENCFF857LHK	right-lung	E2A	kmer	0.438726	0.598454	0.159728
ENCFF542RWT	muscle-of-leg	NFIX_HS_SELEX_M5665_1	pwm	0.52884	0.68853	0.15969
ENCFF806PZH	LNCaP-clone-FGC	HIC2_HS_SELEX_M5512_1	pwm	0.471906	0.631582	0.159676
ENCFF196VQQ	large-intestine	ESR2_HS_HOCOMOCO_M6219_1	pwm	0.439708	0.599326	0.159618
ENCFF643IDL	HFFc6	JUND_HS_SELEX_M0320_1	pwm	0.579704	0.739028	0.159324
ENCFF609KNI	muscle-of-leg	E2A	kmer	0.424382	0.583606	0.159224
ENCFF692AJW	small-intestine	HNF4A_HS_SELEX_M5524_1	pwm	0.484684	0.643858	0.159174
ENCFF457XYZ	brain	NFIX_HS_SELEX_M5665_1	pwm	0.582464	0.74157	0.159106
ENCFF679MSO	retina	VENTXpbm_HS_PBM_M0896_1	pwm	0.550426	0.709506	0.15908
ENCFF243LFH	lung	ZBTB18_HS_SELEX_M5968_1	pwm	0.4618	0.620864	0.159064
ENCFF530CGM	brain	HIC2_HS_SELEX_M5512_1	pwm	0.412664	0.571704	0.15904
ENCFF945DQY	left-lung	NEUROG2_HS_SELEX_M5653_1	pwm	0.458282	0.617196	0.158914
ENCFF972QQK	brain-pericyte	ZIC1_HS_SELEX_M5963_1	pwm	0.478744	0.637528	0.158784
ENCFF854VIP	myotube	ZBTB18_HS_SELEX_M5968_1	pwm	0.457356	0.616128	0.158772
ENCFF384AQH	KBM-7	SFPI1_HS_SELEX_M5863_1	pwm	0.553756	0.712256	0.1585
ENCFF460ZFL	lung-microvascular-endothelial-cell	ETS	kmer	0.586544	0.744966	0.158422
ENCFF103OZQ	islet-precursor-cell	AP2	kmer	0.478758	0.637088	0.15833
ENCFF819ZIM	astrocyte-of-the-cerebellum	RUNX3_HS_SELEX_M5792_1	pwm	0.579122	0.73732	0.158198
ENCFF274FLT	lung	MYF6_MM_PBM_M0210_1	pwm	0.514316	0.672482	0.158166
ENCFF388FUA	common-myeloid-progenitor_-CD34-positive	ETS	kmer	0.621772	0.779498	0.157726
ENCFF419NYS	dermis-blood-vessel-endothelial-cell	ETS	kmer	0.629634	0.787268	0.157634
ENCFF805JKJ	large-intestine	RXRG_MM_PBM_M1440_1	pwm	0.462006	0.619588	0.157582
ENCFF261BTV	muscle-of-back	ZBTB18_HS_SELEX_M5968_1	pwm	0.464906	0.622448	0.157542
ENCFF557HFW	placenta	AP2	kmer	0.478794	0.6362	0.157406
ENCFF829ZEZ	adrenal-gland	ESR2_HS_HOCOMOCO_M6219_1	pwm	0.4424	0.59979	0.15739
ENCFF040LTQ	WERI-Rb-1	E2A	kmer	0.471292	0.628442	0.15715
ENCFF722OVO	brain	NFIX_HS_SELEX_M5665_1	pwm	0.551494	0.708536	0.157042
ENCFF857LHK	right-lung	ZBTB18_HS_SELEX_M5968_1	pwm	0.461136	0.618052	0.156916
ENCFF528GDM	brain	HIC1	kmer	0.461908	0.618674	0.156766
ENCFF530CGM	brain	NFIA_HS_SELEX_M5661_1	pwm	0.505666	0.662402	0.156736
ENCFF384AQH	KBM-7	ELF1_HS_SELEX_M5373_1	pwm	0.571488	0.728192	0.156704
ENCFF326SSU	muscle-of-arm	E2A	kmer	0.414778	0.571462	0.156684
ENCFF230CHA	lung	MYF6_MM_PBM_M0210_1	pwm	0.485306	0.641764	0.156458
ENCFF528GDM	brain	E2A	kmer	0.418376	0.574778	0.156402
ENCFF788MXD	smooth-muscle-cell-of-the-brain-vasculature	ZIC1_HS_SELEX_M5963_1	pwm	0.477814	0.634172	0.156358
ENCFF321LTV	small-intestine	HNF4	kmer	0.502794	0.659134	0.15634
ENCFF663INK	CD8-positive_-alpha-beta-T-cell	FLI1_HS_SELEX_M5431_1	pwm	0.585014	0.741308	0.156294
ENCFF103UPI	brain	HIC2_HS_SELEX_M5512_1	pwm	0.405448	0.56174	0.156292
ENCFF690DRM	left-lung	ZBTB18_HS_SELEX_M5968_1	pwm	0.48588	0.642144	0.156264
ENCFF189LKP	thymus	ZBTB18_HS_SELEX_M5968_1	pwm	0.447552	0.603698	0.156146
ENCFF230WVU	muscle-of-leg	E2A	kmer	0.40711	0.563084	0.155974
ENCFF073TWU	fibroblast-of-skin-of-upper-back	RUNX3_HS_SELEX_M5792_1	pwm	0.500382	0.656356	0.155974
ENCFF572RTJ	muscle-of-leg	MYF6_MM_PBM_M0210_1	pwm	0.471414	0.627352	0.155938
ENCFF134ZJK	right-lung	E2A	kmer	0.439384	0.595232	0.155848
ENCFF560YBU	brain	NFIA_HS_SELEX_M5661_1	pwm	0.51471	0.670534	0.155824
ENCFF103OZQ	islet-precursor-cell	TFAP2A_HS_SELEX_M5912_1	pwm	0.488496	0.644256	0.15576
ENCFF499HUD	KBM-7	FLI1_HS_SELEX_M5431_1	pwm	0.667976	0.823616	0.15564
ENCFF991WDM	muscle-of-arm	ZBTB18_HS_SELEX_M5968_1	pwm	0.4684	0.62396	0.15556
ENCFF448DSH	muscle-of-trunk	ZBTB18_HS_SELEX_M5968_1	pwm	0.464072	0.619442	0.15537
ENCFF134ZJK	right-lung	MYF6_MM_PBM_M0210_1	pwm	0.50968	0.664888	0.155208
ENCFF230WCV	brain	MYF6_MM_PBM_M0210_1	pwm	0.479976	0.63516	0.155184
ENCFF245TMF	right-lung	E2A	kmer	0.426036	0.581086	0.15505
ENCFF499HUD	KBM-7	RUNX3_HS_SELEX_M5792_1	pwm	0.54979	0.70473	0.15494
ENCFF797QID	muscle-of-back	NEUROG2_HS_SELEX_M5653_1	pwm	0.479942	0.63467	0.154728
ENCFF880QTT	placenta	AP2	kmer	0.438418	0.59306	0.154642
ENCFF920DDN	large-intestine	THRA_HS_HOKOMOKO_M6521_1	pwm	0.429926	0.584508	0.154582
ENCFF583HUF	muscle-of-back	E2A	kmer	0.411614	0.566104	0.15449
ENCFF665WNI	thyroid-gland	HIC2_HS_SELEX_M5512_1	pwm	0.46251	0.616986	0.154476
ENCFF559HGO	small-intestine	HNF4A_HS_SELEX_M5524_1	pwm	0.49796	0.652166	0.154206
ENCFF450BGX	common-myeloid-progenitor_-CD34-positive	RUNX3_HS_SELEX_M5792_1	pwm	0.5657	0.719744	0.154044
ENCFF530CGM	brain	HIC1	kmer	0.45129	0.605304	0.154014
ENCFF818WPF	lung	E2A	kmer	0.428264	0.582178	0.153914
ENCFF163TAJ	fibroblast-of-skin-of-scalp	RUNX3_HS_SELEX_M5792_1	pwm	0.45946	0.61337	0.15391
ENCFF289XNF	left-lung	E2A	kmer	0.415958	0.569308	0.15335
ENCFF470QNA	muscle-of-leg	NEUROG2_HS_SELEX_M5653_1	pwm	0.459792	0.6131	0.153308
ENCFF528GDM	brain	HIC2_HS_SELEX_M5512_1	pwm	0.431148	0.584404	0.153256
ENCFF986ZJB	left-lung	ZBTB18_HS_SELEX_M5968_1	pwm	0.454004	0.607252	0.153248
ENCFF806PZH	LNCaP-clone-FGC	NFIX_HS_SELEX_M5665_1	pwm	0.607984	0.76105	0.153066
ENCFF991WDM	muscle-of-arm	MYF6_MM_PBM_M0210_1	pwm	0.464584	0.617638	0.153054
ENCFF630VNL	muscle-of-leg	MYF6_MM_PBM_M0210_1	pwm	0.46929	0.622316	0.153026
ENCFF058ACJ	large-intestine	HNF4A_HS_SELEX_M5524_1	pwm	0.501142	0.654046	0.152904
ENCFF555ZGP	large-intestine	HNF4A_HS_SELEX_M5524_1	pwm	0.50216	0.655062	0.152902
ENCFF704WQC	myotube	RUNX3_HS_SELEX_M5792_1	pwm	0.49662	0.649396	0.152776
ENCFF228YKV	HCT116	JUND_HS_SELEX_M0320_1	pwm	0.6039	0.756624	0.152724
ENCFF040LTQ	WERI-Rb-1	TCF3_HS_SELEX_M5900_1	pwm	0.454478	0.607194	0.152716
ENCFF153SDP	EL	TEAD1_HS_SELEX_M5904_1	pwm	0.547282	0.699942	0.15266
ENCFF036PGY	right-lung	MYF6_MM_PBM_M0210_1	pwm	0.499548	0.65215	0.152602
ENCFF788MXD	smooth-muscle-cell-of-the-brain-vasculature	RUNX3_HS_SELEX_M5792_1	pwm	0.415144	0.56755	0.152406
ENCFF602BHS	placenta	TFAP2A_HS_SELEX_M5912_1	pwm	0.510456	0.662706	0.15225
ENCFF959FMP	thymus	MYF6_MM_PBM_M0210_1	pwm	0.46592	0.618102	0.152182
ENCFF243LFH	lung	MYF6_MM_PBM_M0210_1	pwm	0.493934	0.645936	0.152002
ENCFF679MSO	retina	VENTXselex_HS_SELEX_M5947_1	pwm	0.526148	0.67815	0.152002
ENCFF560YBU	brain	E2A	kmer	0.426054	0.57804	0.151986
ENCFF245TMF	right-lung	ZBTB18_HS_SELEX_M5968_1	pwm	0.47392	0.625776	0.151856
ENCFF059VUS	common-myeloid-progenitor_-CD34-positive	NEUROG2_HS_SELEX_M5653_1	pwm	0.48839	0.640228	0.151838
ENCFF036PGY	right-lung	NEUROG2_HS_SELEX_M5653_1	pwm	0.482664	0.634296	0.151632
ENCFF688ZSR	Jurkat-clone-E61	ID4_HS_SELEX_M5571_1	pwm	0.445016	0.596508	0.151492
ENCFF284QST	muscle-of-back	NEUROG2_HS_SELEX_M5653_1	pwm	0.433236	0.58465	0.151414
ENCFF332PPZ	muscle-of-arm	NEUROG2_HS_SELEX_M5653_1	pwm	0.474718	0.626112	0.151394
ENCFF897JBO	pulmonary-artery-endothelial-cell	FLI1_HS_SELEX_M5431_1	pwm	0.648204	0.799508	0.151304
ENCFF245TMF	right-lung	NEUROG2_HS_SELEX_M5653_1	pwm	0.476458	0.627752	0.151294
ENCFF991WDM	muscle-of-arm	E2A	kmer	0.419022	0.570294	0.151272
ENCFF456VYF	mesendoderm	TEAD1_HS_SELEX_M5904_1	pwm	0.52918	0.680362	0.151182
ENCFF243LFH	lung	NEUROG2_HS_SELEX_M5653_1	pwm	0.47867	0.629792	0.151122
ENCFF850STV	forelimb-muscle	NFIX_HS_SELEX_M5665_1	pwm	0.547608	0.698646	0.151038
ENCFF104JWY	right-lung	E2A	kmer	0.431456	0.582452	0.150996
ENCFF827RCC	left-lung	ZBTB18_HS_SELEX_M5968_1	pwm	0.480104	0.631096	0.150992
ENCFF165ZIA	lung-microvascular-endothelial-cell	ETS	kmer	0.588192	0.739138	0.150946
ENCFF097RTD	cardiac-muscle-cell	TALE_zfC2H2	kmer	0.543664	0.694586	0.150922
ENCFF696LIK	OCI-LY7	ZBTB18_HS_SELEX_M5968_1	pwm	0.47924	0.63014	0.1509
ENCFF611CTG	muscle-of-arm	NFAT	kmer	0.498742	0.64963	0.150888
ENCFF564VUG	placenta	TEAD1_HS_SELEX_M5904_1	pwm	0.527092	0.677968	0.150876
ENCFF984RKH	thymus	RUNX3_HS_SELEX_M5792_1	pwm	0.497572	0.648416	0.150844
ENCFF058ACJ	large-intestine	ESR2_HS_HOCOMOCO_M6219_1	pwm	0.433246	0.58406	0.150814
ENCFF393CAW	HFF-Myc	E2A	kmer	0.437444	0.588224	0.15078
ENCFF947RDC	thymus	SNAI2_HS_SELEX_M5809_1	pwm	0.441322	0.5921	0.150778
ENCFF986DGM	hematopoietic-multipotent-progenitor-cell	ELF1_HS_SELEX_M5373_1	pwm	0.557364	0.708038	0.150674
ENCFF920DDN	large-intestine	HNF4A_HS_SELEX_M5524_1	pwm	0.492	0.642648	0.150648
ENCFF274FLT	lung	E2A	kmer	0.460812	0.611448	0.150636
ENCFF268UJI	smooth-muscle-cell-of-the-brain-vasculature	ZIC	kmer	0.469004	0.619622	0.150618
ENCFF579QTP	muscle-of-leg	NFIX_HS_SELEX_M5665_1	pwm	0.527756	0.678344	0.150588
ENCFF284QST	muscle-of-back	ZBTB18_HS_SELEX_M5968_1	pwm	0.438878	0.589386	0.150508
ENCFF785PSO	muscle-of-back	E2A	kmer	0.41593	0.566432	0.150502
ENCFF625XNX	lung	NEUROG2_HS_SELEX_M5653_1	pwm	0.47324	0.623596	0.150356
ENCFF437IAA	CMK	GATA6_MM_PBM_M0782_1	pwm	0.609858	0.76016	0.150302
ENCFF579QTP	muscle-of-leg	E2A	kmer	0.420376	0.57061	0.150234
ENCFF388FUA	common-myeloid-progenitor_-CD34-positive	ELF1_HS_SELEX_M5373_1	pwm	0.580716	0.730888	0.150172
ENCFF134ZJK	right-lung	ZBTB18_HS_SELEX_M5968_1	pwm	0.48503	0.635114	0.150084
ENCFF703UHS	CD4-positive_-alpha-beta-T-cell	RUNX3_HS_SELEX_M5792_1	pwm	0.494856	0.644888	0.150032
ENCFF456VYF	mesendoderm	TEA	kmer	0.50012	0.650128	0.150008
ENCFF920DDN	large-intestine	RXRG_MM_PBM_M1440_1	pwm	0.439624	0.589574	0.14995
ENCFF251ZXX	lung	E2A	kmer	0.435246	0.585174	0.149928
ENCFF524XCQ	bipolar-neuron	EBF1_HS_SELEX_M5364_1	pwm	0.51498	0.664892	0.149912
ENCFF630VNL	muscle-of-leg	ZBTB18_HS_SELEX_M5968_1	pwm	0.469656	0.61956	0.149904
ENCFF457XYZ	brain	HIC1	kmer	0.453648	0.603544	0.149896
ENCFF850STV	forelimb-muscle	NEUROG2_HS_SELEX_M5653_1	pwm	0.472664	0.622534	0.14987
ENCFF036PGY	right-lung	ZBTB18_HS_SELEX_M5968_1	pwm	0.476296	0.625946	0.14965
ENCFF045KGY	fibroblast-of-skin-of-abdomen	RUNX3_HS_SELEX_M5792_1	pwm	0.495212	0.644842	0.14963
ENCFF523TKA	muscle-of-arm	ZBTB18_HS_SELEX_M5968_1	pwm	0.4604	0.609958	0.149558
ENCFF542RWT	muscle-of-leg	NFAT	kmer	0.520076	0.66951	0.149434
ENCFF495SEM	hematopoietic-multipotent-progenitor-cell	FLI1_HS_SELEX_M5431_1	pwm	0.580678	0.730064	0.149386
ENCFF854EJY	common-myeloid-progenitor_-CD34-positive	MYF6_MM_PBM_M0210_1	pwm	0.469358	0.618608	0.14925
ENCFF319ZSH	adrenal-gland	ESRR	kmer	0.49162	0.64085	0.14923
ENCFF564VUG	placenta	ESR2_HS_HOCOMOCO_M6219_1	pwm	0.429388	0.578578	0.14919
ENCFF166VSZ	placenta	TEA	kmer	0.492922	0.64183	0.148908
ENCFF251ZXX	lung	ZBTB18_HS_SELEX_M5968_1	pwm	0.471232	0.620112	0.14888
ENCFF950DMO	bipolar-neuron	EBF1_HS_SELEX_M5364_1	pwm	0.519576	0.668444	0.148868
ENCFF230WCV	brain	TWIST2_MM_PBM_M0177_1	pwm	0.510908	0.659572	0.148664
ENCFF710SFP	NAMALWA	ZBTB18_HS_SELEX_M5968_1	pwm	0.47226	0.620832	0.148572
ENCFF917YWY	small-intestine	HNF4A_HS_SELEX_M5524_1	pwm	0.496	0.644556	0.148556
ENCFF852FLF	thyroid-gland	HIC1	kmer	0.484396	0.632788	0.148392
ENCFF986ZJB	left-lung	E2A	kmer	0.422442	0.57079	0.148348
ENCFF344IND	right-lung	E2A	kmer	0.429402	0.57773	0.148328
ENCFF590FZJ	heart	HIC2_HS_SELEX_M5512_1	pwm	0.412314	0.56056	0.148246
ENCFF276FKY	large-intestine	E2A	kmer	0.410124	0.558366	0.148242
ENCFF564VUG	placenta	TEA	kmer	0.504114	0.652126	0.148012
ENCFF304GVP	Jurkat-clone-E61	ID4_HS_SELEX_M5571_1	pwm	0.499676	0.647664	0.147988
ENCFF823QRP	dermis-blood-vessel-endothelial-cell	ELF1_HS_SELEX_M5373_1	pwm	0.555584	0.703452	0.147868
ENCFF878HVG	NAMALWA	SNAI2_HS_SELEX_M5809_1	pwm	0.456842	0.604678	0.147836
ENCFF722CYJ	small-intestine	HNF4A_HS_SELEX_M5524_1	pwm	0.491	0.638784	0.147784
ENCFF347YCV	muscle-of-leg	NFAT	kmer	0.51951	0.667248	0.147738
ENCFF159HJV	B-cell	RUNX3_HS_SELEX_M5792_1	pwm	0.476964	0.624674	0.14771
ENCFF233TRB	left-lung	E2A	kmer	0.443582	0.591172	0.14759
ENCFF857LHK	right-lung	NFIX_HS_SELEX_M5665_1	pwm	0.518514	0.666078	0.147564
ENCFF842ESG	HFF-Myc	TWIST2_MM_PBM_M0177_1	pwm	0.536786	0.684298	0.147512
ENCFF711VFJ	muscle-of-arm	NEUROG2_HS_SELEX_M5653_1	pwm	0.488188	0.63565	0.147462
ENCFF481KKG	T-helper-2-cell	FLI1_HS_SELEX_M5431_1	pwm	0.60173	0.74919	0.14746
ENCFF251ZXX	lung	NEUROG2_HS_SELEX_M5653_1	pwm	0.472488	0.619924	0.147436
ENCFF450BGX	common-myeloid-progenitor_-CD34-positive	FLI1_HS_SELEX_M5431_1	pwm	0.650608	0.79804	0.147432
ENCFF414BFO	muscle-of-back	E2A	kmer	0.41427	0.561594	0.147324
ENCFF962IGI	skeletal-muscle-myoblast	E2A	kmer	0.466952	0.614262	0.14731
ENCFF744LRT	lung	E2A	kmer	0.465304	0.612602	0.147298
ENCFF758SYE	gastrocnemius-medialis	HIC2_HS_SELEX_M5512_1	pwm	0.442158	0.589318	0.14716
ENCFF241GBQ	hematopoietic-multipotent-progenitor-cell	NEUROG2_HS_SELEX_M5653_1	pwm	0.443658	0.590724	0.147066
ENCFF307VFD	muscle-of-arm	NFIX_HS_SELEX_M5665_1	pwm	0.553966	0.70088	0.146914
ENCFF419NYS	dermis-blood-vessel-endothelial-cell	ELF1_HS_SELEX_M5373_1	pwm	0.580102	0.72697	0.146868
ENCFF732XMH	Peyers-patch	THRA_HS_HOKOMOKO_M6521_1	pwm	0.417042	0.563662	0.14662
ENCFF743UIM	common-myeloid-progenitor_-CD34-positive	NEUROG2_HS_SELEX_M5653_1	pwm	0.462978	0.609596	0.146618
ENCFF560YBU	brain	TWIST2_MM_PBM_M0177_1	pwm	0.496258	0.642874	0.146616
ENCFF061UBG	thymus	GCM1_HS_SELEX_M5484_1	pwm	0.392538	0.539142	0.146604
ENCFF099MBG	muscle-of-arm	NFAT	kmer	0.502686	0.649268	0.146582
ENCFF743UIM	common-myeloid-progenitor_-CD34-positive	E2A	kmer	0.419398	0.565928	0.14653
ENCFF040LTQ	WERI-Rb-1	OLIG1_HS_SELEX_M5690_1	pwm	0.53274	0.679226	0.146486
ENCFF215UXZ	adrenal-gland	zfC4	kmer	0.429574	0.576058	0.146484
ENCFF474MZJ	muscle-of-back	NEUROG2_HS_SELEX_M5653_1	pwm	0.455716	0.602104	0.146388
ENCFF375XEP	brain	TWIST2_MM_PBM_M0177_1	pwm	0.502296	0.648632	0.146336
ENCFF332PPZ	muscle-of-arm	NFAT	kmer	0.525444	0.67165	0.146206
ENCFF130KKE	left-lung	ZBTB18_HS_SELEX_M5968_1	pwm	0.46714	0.613306	0.146166
ENCFF005DMK	placenta	TEA	kmer	0.482104	0.628124	0.14602
ENCFF420UQF	T-helper-2-cell	RUNX3_HS_SELEX_M5792_1	pwm	0.49498	0.640938	0.145958
ENCFF375XEP	brain	E2A	kmer	0.428062	0.573976	0.145914
ENCFF888NOP	muscle-of-arm	NEUROG2_HS_SELEX_M5653_1	pwm	0.465588	0.61137	0.145782
ENCFF715BDS	muscle-of-arm	ZBTB18_HS_SELEX_M5968_1	pwm	0.4729	0.618662	0.145762
ENCFF099MBG	muscle-of-arm	ZBTB18_HS_SELEX_M5968_1	pwm	0.471188	0.616832	0.145644
ENCFF735APJ	lung	MYF6_MM_PBM_M0210_1	pwm	0.479784	0.625388	0.145604
ENCFF104JWY	right-lung	ZBTB18_HS_SELEX_M5968_1	pwm	0.472232	0.617764	0.145532
ENCFF806PZH	LNCaP-clone-FGC	FOXA2_MM_PBM_M0729_1	pwm	0.586396	0.73184	0.145444
ENCFF084LGH	dermis-blood-vessel-endothelial-cell	ELF1_HS_SELEX_M5373_1	pwm	0.55951	0.70484	0.14533
ENCFF470QNA	muscle-of-leg	MYF6_MM_PBM_M0210_1	pwm	0.473598	0.618852	0.145254
ENCFF474MZJ	muscle-of-back	MYF6_MM_PBM_M0210_1	pwm	0.489114	0.634248	0.145134
ENCFF744LRT	lung	MYF6_MM_PBM_M0210_1	pwm	0.51308	0.658184	0.145104
ENCFF941HUI	stomach	FOX	kmer	0.50973	0.654812	0.145082
ENCFF063OCF	small-intestine	HNF4A_HS_SELEX_M5524_1	pwm	0.48398	0.62906	0.14508
ENCFF059HII	left-lung	ZBTB18_HS_SELEX_M5968_1	pwm	0.46206	0.607088	0.145028
ENCFF097IKA	GM12864	E2A	kmer	0.417284	0.56225	0.144966
ENCFF664QUB	right-lung	E2A	kmer	0.416934	0.561836	0.144902
ENCFF369ALL	WI38	FOX	kmer	0.531516	0.676406	0.14489
ENCFF165ZIA	lung-microvascular-endothelial-cell	ELF1_HS_SELEX_M5373_1	pwm	0.538482	0.683056	0.144574
ENCFF688ZSR	Jurkat-clone-E61	E2A	kmer	0.448824	0.59338	0.144556
ENCFF336OGZ	breast-epithelium	AP2	kmer	0.437816	0.582096	0.14428
ENCFF304GVP	Jurkat-clone-E61	ZNF354C_HS_SELEX_M1950_1	pwm	0.4813	0.625532	0.144232
ENCFF520HRA	H7	SOX4_HS_PBM_M1578_1	pwm	0.497702	0.641814	0.144112
ENCFF941FIK	small-intestine	ESR2_HS_HOCOMOCO_M6219_1	pwm	0.432598	0.576642	0.144044
ENCFF512IML	CD8-positive_-alpha-beta-T-cell	FLI1_HS_SELEX_M5431_1	pwm	0.562254	0.706264	0.14401
ENCFF144XMY	T-helper-2-cell	ETS	kmer	0.596532	0.740386	0.143854
ENCFF856BCY	common-myeloid-progenitor_-CD34-positive	NEUROG2_HS_SELEX_M5653_1	pwm	0.498692	0.6425	0.143808
ENCFF474QAJ	fibroblast-of-skin-of-left-quadriceps	RUNX3_HS_SELEX_M5792_1	pwm	0.481116	0.624798	0.143682
ENCFF927KUT	glomerular-endothelial-cell	ETS	kmer	0.633764	0.777428	0.143664
ENCFF687UQV	neural-stem-progenitor-cell	SOX4_HS_PBM_M1578_1	pwm	0.495	0.638558	0.143558
ENCFF230WCV	brain	HIC1	kmer	0.482534	0.626004	0.14347
ENCFF713OZX	L1-S8R	SOX4_HS_PBM_M1578_1	pwm	0.512356	0.655804	0.143448
ENCFF583HUF	muscle-of-back	NFAT	kmer	0.508892	0.65231	0.143418
ENCFF704WQC	myotube	E2A	kmer	0.470818	0.614168	0.14335
ENCFF856BCY	common-myeloid-progenitor_-CD34-positive	E2A	kmer	0.447588	0.590898	0.14331
ENCFF073TCP	endodermal-cell	ZIC1_HS_SELEX_M5963_1	pwm	0.477116	0.620384	0.143268
ENCFF941FIK	small-intestine	E2A	kmer	0.421282	0.56454	0.143258
ENCFF611CTG	muscle-of-arm	NEUROG2_HS_SELEX_M5653_1	pwm	0.494914	0.638156	0.143242
ENCFF513DVK	EL	TEAD1_HS_SELEX_M5904_1	pwm	0.532476	0.675706	0.14323
ENCFF567LLQ	left-kidney	zfC2H2_RHD	kmer	0.473746	0.616932	0.143186
ENCFF823QRP	dermis-blood-vessel-endothelial-cell	ETS	kmer	0.6188	0.76198	0.14318
ENCFF375XEP	brain	MYF6_MM_PBM_M0210_1	pwm	0.491394	0.634562	0.143168
ENCFF171JLD	muscle-of-back	E2A	kmer	0.42426	0.56742	0.14316
ENCFF128BFZ	placenta	TEAD1_HS_SELEX_M5904_1	pwm	0.535124	0.678252	0.143128
ENCFF606XQS	dermis-microvascular-lymphatic-vessel-endothelial-cell	ETS	kmer	0.606406	0.749488	0.143082
ENCFF911FIA	Karpas-422	AP2	kmer	0.463898	0.606974	0.143076
ENCFF836DBU	cardiovascular-progenitor-cell	ZIC1_HS_SELEX_M5963_1	pwm	0.498848	0.641848	0.143
ENCFF391BRB	lung	ZBTB18_HS_SELEX_M5968_1	pwm	0.500588	0.643512	0.142924
ENCFF366UHV	dermis-microvascular-lymphatic-vessel-endothelial-cell	ELF1_HS_SELEX_M5373_1	pwm	0.560128	0.703034	0.142906
ENCFF948FCS	Daoy	RUNX3_HS_SELEX_M5792_1	pwm	0.518964	0.66179	0.142826
ENCFF837KHA	muscle-of-arm	NEUROG2_HS_SELEX_M5653_1	pwm	0.47445	0.617202	0.142752
ENCFF986DGM	hematopoietic-multipotent-progenitor-cell	NEUROG2_HS_SELEX_M5653_1	pwm	0.467212	0.609946	0.142734
ENCFF347YCV	muscle-of-leg	NEUROG2_HS_SELEX_M5653_1	pwm	0.466864	0.609366	0.142502
ENCFF751OEX	small-intestine	THRA_HS_HOKOMOKO_M6521_1	pwm	0.454074	0.596566	0.142492
ENCFF735JRV	pancreas	TBX5_MM_PBM_M1627_1	pwm	0.43413	0.576546	0.142416
ENCFF690DRM	left-lung	NEUROG2_HS_SELEX_M5653_1	pwm	0.501094	0.643438	0.142344
ENCFF878LVP	dermis-microvascular-lymphatic-vessel-endothelial-cell	ETS	kmer	0.632702	0.775016	0.142314
ENCFF191WFG	CD4-positive_-alpha-beta-T-cell	FLI1_HS_SELEX_M5431_1	pwm	0.59089	0.7331	0.14221
ENCFF805BEX	heart	FOXB1_HS_SELEX_M5438_1	pwm	0.459356	0.601556	0.1422
ENCFF505KHS	HL-60	ETSIII	kmer	0.5231	0.665132	0.142032
ENCFF806PZH	LNCaP-clone-FGC	FOXB1_HS_SELEX_M5438_1	pwm	0.531684	0.673706	0.142022
ENCFF284MUO	muscle-of-back	NFAT	kmer	0.525608	0.667586	0.141978
ENCFF664DCZ	cardiac-muscle-cell	TALE_zfC2H2	kmer	0.536332	0.678296	0.141964
ENCFF559HGO	small-intestine	THRA_HS_HOKOMOKO_M6521_1	pwm	0.42142	0.563258	0.141838
ENCFF191JLB	muscle-of-back	ZBTB18_HS_SELEX_M5968_1	pwm	0.468396	0.610188	0.141792
ENCFF414BFO	muscle-of-back	NFAT	kmer	0.533124	0.674854	0.14173
ENCFF712AKP	lung	MYF6_MM_PBM_M0210_1	pwm	0.513286	0.65485	0.141564
ENCFF171JLD	muscle-of-back	MYF6_MM_PBM_M0210_1	pwm	0.473388	0.614934	0.141546
ENCFF975JLM	right-lung	ZBTB18_HS_SELEX_M5968_1	pwm	0.47856	0.620058	0.141498
ENCFF086KUU	heart	NFIX_HS_SELEX_M5665_1	pwm	0.551166	0.692654	0.141488
ENCFF929VDK	common-myeloid-progenitor_-CD34-positive	FLI1_HS_SELEX_M5431_1	pwm	0.657274	0.798696	0.141422
ENCFF134ZJK	right-lung	NEUROG2_HS_SELEX_M5653_1	pwm	0.498122	0.639512	0.14139
ENCFF397QTB	muscle-of-back	TEAD1_HS_SELEX_M5904_1	pwm	0.511332	0.65266	0.141328
ENCFF583HUF	muscle-of-back	ZBTB18_HS_SELEX_M5968_1	pwm	0.46808	0.60937	0.14129
ENCFF594OFO	fibroblast-of-skin-of-scalp	RUNX3_HS_SELEX_M5792_1	pwm	0.467958	0.609168	0.14121
ENCFF442AYJ	small-intestine	HNF4A_HS_SELEX_M5524_1	pwm	0.501068	0.642272	0.141204
ENCFF842ESG	HFF-Myc	ZBTB18_HS_SELEX_M5968_1	pwm	0.516008	0.657168	0.14116
ENCFF084LGH	dermis-blood-vessel-endothelial-cell	NFATC2_HS_PBM_M1518_1	pwm	0.533054	0.674104	0.14105
ENCFF996VLV	muscle-of-arm	NFAT	kmer	0.519078	0.660102	0.141024
ENCFF557HFW	placenta	TFAP2A_HS_SELEX_M5912_1	pwm	0.472228	0.613222	0.140994
ENCFF251ZXX	lung	MYF6_MM_PBM_M0210_1	pwm	0.497272	0.638218	0.140946
ENCFF365XCB	Karpas-422	E2A	kmer	0.427458	0.568356	0.140898
ENCFF666SXY	thyroid-gland	NFIX_HS_SELEX_M5665_1	pwm	0.58647	0.72728	0.14081
ENCFF007RSQ	heart	TALE_zfC2H2	kmer	0.513722	0.65451	0.140788
ENCFF020LII	muscle-of-leg	ZBTB18_HS_SELEX_M5968_1	pwm	0.462354	0.603064	0.14071
ENCFF623AFX	K562	GLI	kmer	0.433538	0.574154	0.140616
ENCFF878LVP	dermis-microvascular-lymphatic-vessel-endothelial-cell	ELF1_HS_SELEX_M5373_1	pwm	0.567022	0.70762	0.140598
ENCFF806PZH	LNCaP-clone-FGC	FOX	kmer	0.54245	0.683038	0.140588
ENCFF391BRB	lung	NEUROG2_HS_SELEX_M5653_1	pwm	0.509192	0.649772	0.14058
ENCFF241GBQ	hematopoietic-multipotent-progenitor-cell	E2A	kmer	0.419016	0.559542	0.140526
ENCFF836DBU	cardiovascular-progenitor-cell	GATA	kmer	0.503426	0.643868	0.140442
ENCFF448DSH	muscle-of-trunk	NEUROG2_HS_SELEX_M5653_1	pwm	0.457014	0.597374	0.14036
ENCFF352HSZ	adrenal-gland	ESRR	kmer	0.490572	0.630814	0.140242
ENCFF081UUE	muscle-of-back	NFAT	kmer	0.5033	0.64346	0.14016
ENCFF706BCL	body-of-pancreas	SNAI2_HS_SELEX_M5809_1	pwm	0.483948	0.624056	0.140108
ENCFF878HVG	NAMALWA	ZBTB18_HS_SELEX_M5968_1	pwm	0.461164	0.60122	0.140056
ENCFF910QEB	HepG2	ESR2_HS_HOCOMOCO_M6219_1	pwm	0.436138	0.576102	0.139964
ENCFF854EJY	common-myeloid-progenitor_-CD34-positive	NEUROG2_HS_SELEX_M5653_1	pwm	0.470034	0.609956	0.139922
ENCFF524XCQ	bipolar-neuron	AP2	kmer	0.459836	0.599674	0.139838
ENCFF870MCD	H7	ZIC1_HS_SELEX_M5963_1	pwm	0.4982	0.637896	0.139696
ENCFF499HUD	KBM-7	ETS	kmer	0.671224	0.810904	0.13968
ENCFF196VQQ	large-intestine	THRA_HS_HOKOMOKO_M6521_1	pwm	0.472324	0.611992	0.139668
ENCFF024DAR	common-myeloid-progenitor_-CD34-positive	ETS	kmer	0.625932	0.765558	0.139626
ENCFF046QJY	right-lung	MYF6_MM_PBM_M0210_1	pwm	0.517136	0.656634	0.139498
ENCFF854VIP	myotube	RUNX3_HS_SELEX_M5792_1	pwm	0.472836	0.612258	0.139422
ENCFF654MRJ	T-helper-1-cell	ZNF354C_HS_SELEX_M1950_1	pwm	0.483564	0.622962	0.139398
ENCFF950DMO	bipolar-neuron	AP2	kmer	0.466876	0.60627	0.139394
ENCFF805JKJ	large-intestine	THRA_HS_HOKOMOKO_M6521_1	pwm	0.469824	0.609194	0.13937
ENCFF195KNE	T-helper-1-cell	ELF1_HS_SELEX_M5373_1	pwm	0.5642	0.703472	0.139272
ENCFF163TAJ	fibroblast-of-skin-of-scalp	TEAD1_HS_SELEX_M5904_1	pwm	0.56597	0.70514	0.13917
ENCFF948FCS	Daoy	JUND_HS_SELEX_M0320_1	pwm	0.627782	0.766944	0.139162
ENCFF609KNI	muscle-of-leg	NEUROG2_HS_SELEX_M5653_1	pwm	0.453984	0.593136	0.139152
ENCFF562ESR	transverse-colon	TBX5_MM_PBM_M1627_1	pwm	0.45537	0.594518	0.139148
ENCFF836ETB	muscle-of-trunk	NEUROG2_HS_SELEX_M5653_1	pwm	0.476984	0.616058	0.139074
ENCFF061UBG	thymus	ZBTB18_HS_SELEX_M5968_1	pwm	0.469716	0.60868	0.138964
ENCFF059VUS	common-myeloid-progenitor_-CD34-positive	ETS	kmer	0.632382	0.771302	0.13892
ENCFF230WVU	muscle-of-leg	ZBTB18_HS_SELEX_M5968_1	pwm	0.476596	0.615462	0.138866
ENCFF230WVU	muscle-of-leg	NFAT	kmer	0.524898	0.663712	0.138814
ENCFF276FKY	large-intestine	RXRG_MM_PBM_M1440_1	pwm	0.423332	0.561828	0.138496
ENCFF185LPE	HL-60	CEBP	kmer	0.61054	0.748948	0.138408
ENCFF421EQO	placenta	TEAD1_HS_SELEX_M5904_1	pwm	0.48433	0.622712	0.138382
ENCFF665WNI	thyroid-gland	HIC1	kmer	0.488512	0.62685	0.138338
ENCFF679HWR	large-intestine	ESR2_HS_HOCOMOCO_M6219_1	pwm	0.442926	0.581222	0.138296
ENCFF701IYS	stomach	NFIX_HS_SELEX_M5665_1	pwm	0.556788	0.694916	0.138128
ENCFF579QTP	muscle-of-leg	ZBTB18_HS_SELEX_M5968_1	pwm	0.47749	0.615578	0.138088
ENCFF133YNT	natural-killer-cell	FLI1_HS_SELEX_M5431_1	pwm	0.597172	0.735222	0.13805
ENCFF181GIN	placenta	TEAD1_HS_SELEX_M5904_1	pwm	0.498732	0.636756	0.138024
ENCFF752PFI	right-lobe-of-liver	ESR2_HS_HOCOMOCO_M6219_1	pwm	0.43955	0.57755	0.138
ENCFF421EQO	placenta	TEA	kmer	0.483888	0.621872	0.137984
ENCFF474MZJ	muscle-of-back	NFIX_HS_SELEX_M5665_1	pwm	0.558076	0.696032	0.137956
ENCFF818WPF	lung	ZBTB18_HS_SELEX_M5968_1	pwm	0.464676	0.60261	0.137934
ENCFF166VSZ	placenta	GRHL1_HS_SELEX_M5498_1	pwm	0.51613	0.654052	0.137922
ENCFF947RDC	thymus	ZBTB18_HS_SELEX_M5968_1	pwm	0.453854	0.59168	0.137826
ENCFF058ACJ	large-intestine	THRA_HS_HOKOMOKO_M6521_1	pwm	0.440854	0.578598	0.137744
ENCFF996VLV	muscle-of-arm	ZBTB18_HS_SELEX_M5968_1	pwm	0.460644	0.598266	0.137622
ENCFF818WPF	lung	MYF6_MM_PBM_M0210_1	pwm	0.50003	0.637638	0.137608
ENCFF304GVP	Jurkat-clone-E61	MYF6_MM_PBM_M0210_1	pwm	0.50392	0.641418	0.137498
ENCFF059HII	left-lung	MYF6_MM_PBM_M0210_1	pwm	0.478556	0.616042	0.137486
ENCFF116OFN	thyroid-gland	HIC2_HS_SELEX_M5512_1	pwm	0.432078	0.569528	0.13745
ENCFF594OFO	fibroblast-of-skin-of-scalp	TEAD1_HS_SELEX_M5904_1	pwm	0.564176	0.701614	0.137438
ENCFF993TCA	glomerular-endothelial-cell	ETS	kmer	0.65346	0.790892	0.137432
ENCFF806PZH	LNCaP-clone-FGC	HIC1	kmer	0.506214	0.64364	0.137426
ENCFF679MSO	retina	LHX4_MM_SELEX_M6041_1	pwm	0.56609	0.703452	0.137362
ENCFF040LTQ	WERI-Rb-1	MYF6_MM_PBM_M0210_1	pwm	0.493844	0.631196	0.137352
ENCFF581UTE	B-cell	AP2	kmer	0.446814	0.584108	0.137294
ENCFF560YBU	brain	MYF6_MM_PBM_M0210_1	pwm	0.478676	0.615948	0.137272
ENCFF852FLF	thyroid-gland	NFIX_HS_SELEX_M5665_1	pwm	0.590936	0.728076	0.13714
ENCFF413SVK	AG09319	RUNX3_HS_SELEX_M5792_1	pwm	0.449916	0.586818	0.136902
ENCFF401SKP	muscle-of-leg	NFAT	kmer	0.531662	0.668202	0.13654
ENCFF221FND	Daoy	RUNX3_HS_SELEX_M5792_1	pwm	0.502986	0.639522	0.136536
ENCFF136FZU	right-lung	NEUROG2_HS_SELEX_M5653_1	pwm	0.484574	0.621086	0.136512
ENCFF366XFZ	NT2_D1	SOX4_HS_PBM_M1578_1	pwm	0.521964	0.658446	0.136482
ENCFF094AUJ	adrenal-gland	ESRR-II	kmer	0.510806	0.647286	0.13648
ENCFF751OEX	small-intestine	ESR2_HS_HOCOMOCO_M6219_1	pwm	0.442946	0.57939	0.136444
ENCFF171LSI	common-myeloid-progenitor_-CD34-positive	ETS	kmer	0.615262	0.751662	0.1364
ENCFF382NHI	fibroblast-of-skin-of-right-biceps	RUNX3_HS_SELEX_M5792_1	pwm	0.50405	0.64045	0.1364
ENCFF523TKA	muscle-of-arm	NFAT	kmer	0.528752	0.665114	0.136362
ENCFF223UWR	skeletal-muscle-myoblast	E2A	kmer	0.487366	0.623638	0.136272
ENCFF424GPY	CD14-positive-monocyte	ETSIII	kmer	0.577088	0.713324	0.136236
ENCFF059VUS	common-myeloid-progenitor_-CD34-positive	E2A	kmer	0.456094	0.592264	0.13617
ENCFF590FZJ	heart	NFIX_HS_SELEX_M5665_1	pwm	0.555794	0.69192	0.136126
ENCFF254WCU	stromal-cell-of-bone-marrow	RUNX3_HS_SELEX_M5792_1	pwm	0.474798	0.610856	0.136058
ENCFF984RKH	thymus	ZBTB18_HS_SELEX_M5968_1	pwm	0.474976	0.610932	0.135956
ENCFF947RDC	thymus	TBX5_MM_PBM_M1627_1	pwm	0.435106	0.571	0.135894
ENCFF171LSI	common-myeloid-progenitor_-CD34-positive	ELF1_HS_SELEX_M5373_1	pwm	0.56168	0.697552	0.135872
ENCFF284MUO	muscle-of-back	MYF6_MM_PBM_M0210_1	pwm	0.485094	0.62096	0.135866
ENCFF233TRB	left-lung	ZBTB18_HS_SELEX_M5968_1	pwm	0.481568	0.617408	0.13584
ENCFF307VFD	muscle-of-arm	NEUROG2_HS_SELEX_M5653_1	pwm	0.464424	0.600216	0.135792
ENCFF993TCA	glomerular-endothelial-cell	FLI1_HS_SELEX_M5431_1	pwm	0.694982	0.830758	0.135776
ENCFF319CPJ	muscle-of-leg	NFAT	kmer	0.5307	0.666448	0.135748
ENCFF706BCL	body-of-pancreas	HIC2_HS_SELEX_M5512_1	pwm	0.449206	0.584828	0.135622
ENCFF245TMF	right-lung	MYF6_MM_PBM_M0210_1	pwm	0.498806	0.634396	0.13559
ENCFF159HJV	B-cell	ETSIII	kmer	0.516004	0.651542	0.135538
ENCFF241GBQ	hematopoietic-multipotent-progenitor-cell	ELF1_HS_SELEX_M5373_1	pwm	0.57019	0.705668	0.135478
ENCFF046QJY	right-lung	NEUROG2_HS_SELEX_M5653_1	pwm	0.501232	0.636682	0.13545
ENCFF267VKD	CD1c-positive-myeloid-dendritic-cell	SFPI1_HS_SELEX_M5863_1	pwm	0.53008	0.66552	0.13544
ENCFF020LII	muscle-of-leg	E2A	kmer	0.422414	0.557836	0.135422
ENCFF193PBQ	heart	MYF6_MM_PBM_M0210_1	pwm	0.490444	0.625842	0.135398
ENCFF672BMB	mammary-epithelial-cell	bZIP	kmer	0.53043	0.6658	0.13537
ENCFF366UHV	dermis-microvascular-lymphatic-vessel-endothelial-cell	ETS	kmer	0.607914	0.743226	0.135312
ENCFF274FLT	lung	ZBTB18_HS_SELEX_M5968_1	pwm	0.499122	0.63441	0.135288
ENCFF230WVU	muscle-of-leg	NEUROG2_HS_SELEX_M5653_1	pwm	0.454142	0.589336	0.135194
ENCFF871GML	heart	MEIS2_MM_PBM_M0965_1	pwm	0.550842	0.686002	0.13516
ENCFF094AUJ	adrenal-gland	RXRG_MM_PBM_M1440_1	pwm	0.46365	0.598788	0.135138
ENCFF732XMH	Peyers-patch	E2A	kmer	0.428044	0.563094	0.13505
ENCFF215UXZ	adrenal-gland	RXRG_MM_PBM_M1440_1	pwm	0.456466	0.591392	0.134926
ENCFF105ETE	non-pigmented-ciliary-epithelial-cell	RUNX3_HS_SELEX_M5792_1	pwm	0.53912	0.674012	0.134892
ENCFF089IWT	fibroblast-of-peridontal-ligament	RUNX3_HS_SELEX_M5792_1	pwm	0.49777	0.632652	0.134882
ENCFF241GBQ	hematopoietic-multipotent-progenitor-cell	ZNF354C_HS_SELEX_M1950_1	pwm	0.421762	0.556562	0.1348
ENCFF962IGI	skeletal-muscle-myoblast	RUNX3_HS_SELEX_M5792_1	pwm	0.543596	0.67832	0.134724
ENCFF871GML	heart	TALE_zfC2H2	kmer	0.5335	0.668178	0.134678
ENCFF097IKA	GM12864	IRF	kmer	0.54585	0.680518	0.134668
ENCFF289XSM	CD14-positive-monocyte	SFPI1_HS_SELEX_M5863_1	pwm	0.53311	0.667778	0.134668
ENCFF854VIP	myotube	NEUROG2_HS_SELEX_M5653_1	pwm	0.50707	0.641686	0.134616
ENCFF221FPW	fibroblast-of-villous-mesenchyme	ZBTB18_HS_SELEX_M5968_1	pwm	0.44742	0.582036	0.134616
ENCFF469AJE	fibroblast-of-skin-of-upper-back	RUNX3_HS_SELEX_M5792_1	pwm	0.52371	0.65832	0.13461
ENCFF059VUS	common-myeloid-progenitor_-CD34-positive	MYF6_MM_PBM_M0210_1	pwm	0.497068	0.63157	0.134502
ENCFF725QIG	common-myeloid-progenitor_-CD34-positive	ETS	kmer	0.622794	0.757254	0.13446
ENCFF570PDT	hematopoietic-multipotent-progenitor-cell	ETS	kmer	0.611748	0.746192	0.134444
ENCFF827RCC	left-lung	MYF6_MM_PBM_M0210_1	pwm	0.5219	0.656334	0.134434
ENCFF735APJ	lung	ZBTB18_HS_SELEX_M5968_1	pwm	0.469472	0.603824	0.134352
ENCFF911OBG	AG04450	NEUROG2_HS_SELEX_M5653_1	pwm	0.485696	0.620042	0.134346
ENCFF168YQF	T-cell	FLI1_HS_SELEX_M5431_1	pwm	0.604872	0.739102	0.13423
ENCFF706BCL	body-of-pancreas	NFIX_HS_SELEX_M5665_1	pwm	0.582734	0.716918	0.134184
ENCFF865LCY	SK-N-DZ	E2A	kmer	0.449322	0.583432	0.13411
ENCFF836ETB	muscle-of-trunk	NFAT	kmer	0.487814	0.62189	0.134076
ENCFF520HKD	heart-left-ventricle	MEF2A_HS_SELEX_M5615_1	pwm	0.491872	0.62593	0.134058
ENCFF915CHV	retinal-pigment-epithelial-cell	OTX1_HS_SELEX_M5699_1	pwm	0.602206	0.736234	0.134028
ENCFF878HVG	NAMALWA	MYF6_MM_PBM_M0210_1	pwm	0.48584	0.619806	0.133966
ENCFF142WAA	transverse-colon	E2A	kmer	0.437662	0.571614	0.133952
ENCFF250FRA	heart-right-ventricle	MEF2A_HS_SELEX_M5615_1	pwm	0.4868	0.620728	0.133928
ENCFF664DCZ	cardiac-muscle-cell	MEIS2_MM_PBM_M0965_1	pwm	0.553792	0.687688	0.133896
ENCFF222SCR	endodermal-cell	ZIC1_HS_SELEX_M5963_1	pwm	0.48384	0.61772	0.13388
ENCFF230WCV	brain	NFIA_HS_SELEX_M5661_1	pwm	0.514494	0.648348	0.133854
ENCFF401SKP	muscle-of-leg	MYF6_MM_PBM_M0210_1	pwm	0.486806	0.620562	0.133756
ENCFF897PRD	pancreas	TBX5_MM_PBM_M1627_1	pwm	0.443048	0.576778	0.13373
ENCFF665WNI	thyroid-gland	NFIX_HS_SELEX_M5665_1	pwm	0.598756	0.732392	0.133636
ENCFF547UCK	T-cell	FLI1_HS_SELEX_M5431_1	pwm	0.586502	0.720044	0.133542
ENCFF743UIM	common-myeloid-progenitor_-CD34-positive	ETS	kmer	0.623672	0.757174	0.133502
ENCFF321LTV	small-intestine	THRA_HS_HOKOMOKO_M6521_1	pwm	0.467244	0.600652	0.133408
ENCFF679HWR	large-intestine	HNF4	kmer	0.496402	0.62975	0.133348
ENCFF402DMO	retina	Hbox-III	kmer	0.497614	0.630904	0.13329
ENCFF602BHS	placenta	AP2	kmer	0.558448	0.691684	0.133236
ENCFF932FKV	HS-27A	TEAD1_HS_SELEX_M5904_1	pwm	0.576716	0.709892	0.133176
ENCFF744LRT	lung	ZBTB18_HS_SELEX_M5968_1	pwm	0.498656	0.631774	0.133118
ENCFF833JBU	heart	NFIX_HS_SELEX_M5665_1	pwm	0.563946	0.69703	0.133084
ENCFF520HKD	heart-left-ventricle	MEF2B_HS_SELEX_M5616_1	pwm	0.498	0.631048	0.133048
ENCFF189LKP	thymus	SNAI2_HS_SELEX_M5809_1	pwm	0.44575	0.57879	0.13304
ENCFF023ZMS	CD4-positive_-alpha-beta-T-cell	FLI1_HS_SELEX_M5431_1	pwm	0.572102	0.705108	0.133006
ENCFF460ZFL	lung-microvascular-endothelial-cell	ELF1_HS_SELEX_M5373_1	pwm	0.54518	0.678102	0.132922
ENCFF175RBN	HCT116	JUND_HS_SELEX_M0320_1	pwm	0.611122	0.743958	0.132836
ENCFF722OVO	brain	HIC2_HS_SELEX_M5512_1	pwm	0.426726	0.559354	0.132628
ENCFF542RWT	muscle-of-leg	NEUROG2_HS_SELEX_M5653_1	pwm	0.48633	0.618932	0.132602
ENCFF311LCN	muscle-of-arm	NFIX_HS_SELEX_M5665_1	pwm	0.56593	0.698478	0.132548
ENCFF715BDS	muscle-of-arm	E2A	kmer	0.431904	0.564412	0.132508
ENCFF797QID	muscle-of-back	NFIX_HS_SELEX_M5665_1	pwm	0.526094	0.658528	0.132434
ENCFF393CAW	HFF-Myc	TWIST2_MM_PBM_M0177_1	pwm	0.528764	0.661154	0.13239
ENCFF523BCF	psoas-muscle	MYF6_MM_PBM_M0210_1	pwm	0.49439	0.626772	0.132382
ENCFF672BMB	mammary-epithelial-cell	CEBPB_HS_SELEX_M5314_1	pwm	0.528642	0.661018	0.132376
ENCFF688ZSR	Jurkat-clone-E61	FLI1_HS_SELEX_M5431_1	pwm	0.594758	0.727064	0.132306
ENCFF931JXH	HFFc6	JUND_HS_SELEX_M0320_1	pwm	0.597192	0.729384	0.132192
ENCFF481KKG	T-helper-2-cell	ZNF354C_HS_SELEX_M1950_1	pwm	0.46838	0.600572	0.132192
ENCFF857LHK	right-lung	NEUROG2_HS_SELEX_M5653_1	pwm	0.486124	0.618212	0.132088
ENCFF289XSM	CD14-positive-monocyte	FLI1_HS_SELEX_M5431_1	pwm	0.589058	0.721016	0.131958
ENCFF984RKH	thymus	TBX5_MM_PBM_M1627_1	pwm	0.43687	0.568804	0.131934
ENCFF207IYJ	brain	RFX	kmer	0.530728	0.662584	0.131856
ENCFF189LKP	thymus	TBX5_MM_PBM_M1627_1	pwm	0.429768	0.56156	0.131792
ENCFF698ZFJ	astrocyte-of-the-hippocampus	TEAD1_HS_SELEX_M5904_1	pwm	0.499946	0.631726	0.13178
ENCFF193PBQ	heart	MEIS2_MM_PBM_M0965_1	pwm	0.58055	0.71229	0.13174
ENCFF460ZFL	lung-microvascular-endothelial-cell	NFAT	kmer	0.5119	0.643464	0.131564
ENCFF483RJF	T-helper-17-cell	ELF1_HS_SELEX_M5373_1	pwm	0.607564	0.739122	0.131558
ENCFF710SFP	NAMALWA	RUNX3_HS_SELEX_M5792_1	pwm	0.472622	0.604136	0.131514
ENCFF393CAW	HFF-Myc	MYF6_MM_PBM_M0210_1	pwm	0.50297	0.63441	0.13144
ENCFF984RKH	thymus	GCM1_HS_SELEX_M5484_1	pwm	0.402798	0.534214	0.131416
ENCFF533MFM	trophoblast-cell	TEAD1_HS_SELEX_M5904_1	pwm	0.514178	0.645562	0.131384
ENCFF175RBN	HCT116	bZIP	kmer	0.578636	0.709978	0.131342
ENCFF712AKP	lung	NFIX_HS_SELEX_M5665_1	pwm	0.57549	0.706822	0.131332
ENCFF179WUI	adrenal-gland	AP2	kmer	0.458128	0.589448	0.13132
ENCFF452BSD	astrocyte-of-the-spinal-cord	RUNX3_HS_SELEX_M5792_1	pwm	0.533886	0.665176	0.13129
ENCFF196VQQ	large-intestine	RXRG_MM_PBM_M1440_1	pwm	0.479568	0.610858	0.13129
ENCFF564SMU	small-intestine	HNF4	kmer	0.499368	0.630614	0.131246
ENCFF284MUO	muscle-of-back	NEUROG2_HS_SELEX_M5653_1	pwm	0.47189	0.603114	0.131224
ENCFF191HPU	fibroblast-of-skin-of-right-quadriceps	RUNX3_HS_SELEX_M5792_1	pwm	0.496604	0.627818	0.131214
ENCFF012QDX	T-helper-1-cell	ELF1_HS_SELEX_M5373_1	pwm	0.614598	0.745772	0.131174
ENCFF314TNS	WI38	FOX	kmer	0.51432	0.64547	0.13115
ENCFF972QQK	brain-pericyte	ZIC	kmer	0.465638	0.596774	0.131136
ENCFF215UXZ	adrenal-gland	ESRR-II	kmer	0.496232	0.627358	0.131126
ENCFF991WDM	muscle-of-arm	NFAT	kmer	0.520176	0.651278	0.131102
ENCFF523ZGF	large-intestine	HNF4A_HS_SELEX_M5524_1	pwm	0.492808	0.623772	0.130964
ENCFF767GYT	M059J	RUNX3_HS_SELEX_M5792_1	pwm	0.550454	0.681416	0.130962
ENCFF712AKP	lung	NEUROG2_HS_SELEX_M5653_1	pwm	0.513644	0.644576	0.130932
ENCFF199RXV	stomach	FOXB1_HS_SELEX_M5438_1	pwm	0.47535	0.606256	0.130906
ENCFF540HZS	muscle-of-back	NFAT	kmer	0.53326	0.664142	0.130882
ENCFF336OGZ	breast-epithelium	TFAP2A_HS_SELEX_M5912_1	pwm	0.44914	0.579968	0.130828
ENCFF603RPR	ascending-aorta	HIC2_HS_SELEX_M5512_1	pwm	0.419856	0.550638	0.130782
ENCFF401SKP	muscle-of-leg	NEUROG2_HS_SELEX_M5653_1	pwm	0.49834	0.629106	0.130766
ENCFF024DAR	common-myeloid-progenitor_-CD34-positive	ELF1_HS_SELEX_M5373_1	pwm	0.57864	0.70936	0.13072
ENCFF910QEB	HepG2	RXRG_MM_PBM_M1440_1	pwm	0.439632	0.570332	0.1307
ENCFF664QUB	right-lung	ZBTB18_HS_SELEX_M5968_1	pwm	0.457828	0.58852	0.130692
ENCFF862ZMZ	cardiac-muscle-cell	RUNX3_HS_SELEX_M5792_1	pwm	0.447464	0.57814	0.130676
ENCFF674ZTX	muscle-of-leg	NFAT	kmer	0.52079	0.65145	0.13066
ENCFF191HPU	fibroblast-of-skin-of-right-quadriceps	TEAD1_HS_SELEX_M5904_1	pwm	0.54615	0.67675	0.1306
ENCFF768WKW	SK-N-DZ	E2A	kmer	0.451568	0.582164	0.130596
ENCFF452EGS	LNCaP-clone-FGC	FOXA2_MM_PBM_M0729_1	pwm	0.622708	0.753302	0.130594
ENCFF947RDC	thymus	ZNF354C_HS_SELEX_M1950_1	pwm	0.445876	0.576428	0.130552
ENCFF803JHO	astrocyte	RUNX3_HS_SELEX_M5792_1	pwm	0.590366	0.720838	0.130472
ENCFF505KHS	HL-60	RUNX3_HS_SELEX_M5792_1	pwm	0.513492	0.643932	0.13044
ENCFF797TTK	heart	TALE_zfC2H2	kmer	0.534562	0.664894	0.130332
ENCFF745UXV	mesenchymal-stem-cell	RUNX3_HS_SELEX_M5792_1	pwm	0.48335	0.61363	0.13028
ENCFF842ESG	HFF-Myc	E2A	kmer	0.453688	0.583962	0.130274
ENCFF221FND	Daoy	JUND_HS_SELEX_M0320_1	pwm	0.605564	0.735786	0.130222
ENCFF931JXH	HFFc6	RUNX3_HS_SELEX_M5792_1	pwm	0.459088	0.589294	0.130206
ENCFF590FZJ	heart	MEIS2_MM_PBM_M0965_1	pwm	0.541942	0.672108	0.130166
ENCFF171JLD	muscle-of-back	NFAT	kmer	0.516282	0.646432	0.13015
ENCFF428OZI	right-lung	NEUROG2_HS_SELEX_M5653_1	pwm	0.46825	0.59832	0.13007
ENCFF847WTW	muscle-of-back	NEUROG2_HS_SELEX_M5653_1	pwm	0.473596	0.603472	0.129876
ENCFF528GDM	brain	MYF6_MM_PBM_M0210_1	pwm	0.49196	0.62182	0.12986
ENCFF725QIG	common-myeloid-progenitor_-CD34-positive	ELF1_HS_SELEX_M5373_1	pwm	0.575316	0.70509	0.129774
ENCFF130KKE	left-lung	NEUROG2_HS_SELEX_M5653_1	pwm	0.495778	0.625546	0.129768
ENCFF572RTJ	muscle-of-leg	NFAT	kmer	0.531558	0.661196	0.129638
ENCFF602XCK	naive-thymus-derived-CD4-positive_-alpha-beta-T-cell	ZNF354C_HS_SELEX_M1950_1	pwm	0.4495	0.579118	0.129618
ENCFF687UQV	neural-stem-progenitor-cell	SOXC	kmer	0.494158	0.623674	0.129516
ENCFF606XQS	dermis-microvascular-lymphatic-vessel-endothelial-cell	FOX	kmer	0.518488	0.647996	0.129508
ENCFF562ESR	transverse-colon	SNAI2_HS_SELEX_M5809_1	pwm	0.442066	0.57157	0.129504
11	iPS-DF-19	TEAD1_HS_SELEX_M5904_1	pwm	0.492038	0.62148	0.129442
ENCFF588SBI	muscle-of-arm	NEUROG2_HS_SELEX_M5653_1	pwm	0.458812	0.588192	0.12938
ENCFF865LCY	SK-N-DZ	VENTXselex_HS_SELEX_M5947_1	pwm	0.526004	0.655344	0.12934
ENCFF818WPF	lung	NEUROG2_HS_SELEX_M5653_1	pwm	0.500364	0.6297	0.129336
ENCFF172LKJ	muscle-of-arm	ZBTB18_HS_SELEX_M5968_1	pwm	0.44351	0.572752	0.129242
ENCFF261BTV	muscle-of-back	MYF6_MM_PBM_M0210_1	pwm	0.49244	0.621588	0.129148
ENCFF541GPX	Caco-2	GLI	kmer	0.429666	0.558624	0.128958
ENCFF602BHS	placenta	THRA_HS_HOKOMOKO_M6521_1	pwm	0.442446	0.571402	0.128956
ENCFF811USD	large-intestine	HNF4A_HS_SELEX_M5524_1	pwm	0.499066	0.62792	0.128854
ENCFF344IND	right-lung	ZBTB18_HS_SELEX_M5968_1	pwm	0.479836	0.608688	0.128852
ENCFF735JRV	pancreas	ZBTB18_HS_SELEX_M5968_1	pwm	0.45638	0.585202	0.128822
ENCFF007RSQ	heart	NFIX_HS_SELEX_M5665_1	pwm	0.556662	0.685474	0.128812
ENCFF715BDS	muscle-of-arm	NFAT	kmer	0.509538	0.63833	0.128792
ENCFF122TCQ	stomach	zfCXXC_SAND	kmer	0.439334	0.568082	0.128748
ENCFF063OCF	small-intestine	HNF4	kmer	0.490374	0.619114	0.12874
ENCFF020LII	muscle-of-leg	NFAT	kmer	0.510258	0.63894	0.128682
ENCFF338GII	bronchial-epithelial-cell	P53_HS_SELEX_M6105_1	pwm	0.597386	0.726038	0.128652
ENCFF104JWY	right-lung	MYF6_MM_PBM_M0210_1	pwm	0.502084	0.630724	0.12864
ENCFF782LZX	L1-S8R	SOXC	kmer	0.50461	0.633246	0.128636
ENCFF391BRB	lung	MYF6_MM_PBM_M0210_1	pwm	0.539692	0.668302	0.12861
ENCFF659BCP	muscle-of-leg	NEUROG2_HS_SELEX_M5653_1	pwm	0.469618	0.598188	0.12857
ENCFF897JBO	pulmonary-artery-endothelial-cell	ETS	kmer	0.639992	0.768414	0.128422
ENCFF562NMD	muscle-of-trunk	NEUROG2_HS_SELEX_M5653_1	pwm	0.469046	0.597338	0.128292
ENCFF096NVD	CD1c-positive-myeloid-dendritic-cell	EGR	kmer	0.457054	0.585336	0.128282
ENCFF797TTK	heart	MEIS2_MM_PBM_M0965_1	pwm	0.547084	0.67535	0.128266
ENCFF752PFI	right-lobe-of-liver	HIC2_HS_SELEX_M5512_1	pwm	0.441424	0.569674	0.12825
ENCFF785PSO	muscle-of-back	ZBTB18_HS_SELEX_M5968_1	pwm	0.475504	0.603732	0.128228
ENCFF097KBE	endothelial-cell-of-umbilical-vein	ETS	kmer	0.599266	0.727482	0.128216
ENCFF941HUI	stomach	SNAI2_HS_SELEX_M5809_1	pwm	0.44617	0.574382	0.128212
ENCFF710SFP	NAMALWA	SNAI2_HS_SELEX_M5809_1	pwm	0.465514	0.593718	0.128204
ENCFF304GVP	Jurkat-clone-E61	FLI1_HS_SELEX_M5431_1	pwm	0.592422	0.720586	0.128164
ENCFF162HDT	spinal-cord	RFX4primary_MM_PBM	pwm	0.51604	0.64418	0.12814
ENCFF805JKJ	large-intestine	zfC4	kmer	0.476082	0.60422	0.128138
ENCFF401SKP	muscle-of-leg	NFIX_HS_SELEX_M5665_1	pwm	0.582674	0.71079	0.128116
ENCFF311LCN	muscle-of-arm	NFAT	kmer	0.524508	0.652582	0.128074
ENCFF674ZTX	muscle-of-leg	NFIX_HS_SELEX_M5665_1	pwm	0.553564	0.681624	0.12806
ENCFF552CWN	bronchial-epithelial-cell	P53_HS_SELEX_M6105_1	pwm	0.536166	0.664184	0.128018
ENCFF744IAP	kidney	zfC2H2_RHD	kmer	0.525858	0.653874	0.128016
ENCFF457XYZ	brain	NFIA_HS_SELEX_M5661_1	pwm	0.510464	0.638446	0.127982
ENCFF609KNI	muscle-of-leg	NFAT	kmer	0.525218	0.653192	0.127974
ENCFF063OCF	small-intestine	GLI	kmer	0.39765	0.52562	0.12797
ENCFF336MQK	fibroblast-of-skin-of-left-biceps	NEUROG2_HS_SELEX_M5653_1	pwm	0.481756	0.609706	0.12795
ENCFF338NUC	muscle-of-arm	E2A	kmer	0.433048	0.560908	0.12786
ENCFF166VSZ	placenta	TEAD1_HS_SELEX_M5904_1	pwm	0.528944	0.656776	0.127832
ENCFF883WWT	ovary	AR_MM_PBM_M1456_1	pwm	0.44808	0.57582	0.12774
ENCFF110CYC	common-myeloid-progenitor_-CD34-positive	ELF1_HS_SELEX_M5373_1	pwm	0.596638	0.724374	0.127736
ENCFF189LKP	thymus	ZNF354C_HS_SELEX_M1950_1	pwm	0.433226	0.560934	0.127708
ENCFF961JXL	thymus	RUNX3_HS_SELEX_M5792_1	pwm	0.500506	0.628212	0.127706
ENCFF805BEX	heart	TALE_zfC2H2	kmer	0.549046	0.6767	0.127654
ENCFF388FUA	common-myeloid-progenitor_-CD34-positive	ETSIII	kmer	0.514638	0.642198	0.12756
ENCFF606XQS	dermis-microvascular-lymphatic-vessel-endothelial-cell	ELF1_HS_SELEX_M5373_1	pwm	0.569514	0.697026	0.127512
ENCFF229RBJ	stomach	HIC2_HS_SELEX_M5512_1	pwm	0.444976	0.572442	0.127466
ENCFF533MFM	trophoblast-cell	GCM1_HS_SELEX_M5484_1	pwm	0.427654	0.554836	0.127182
ENCFF696LIK	OCI-LY7	RUNX3_HS_SELEX_M5792_1	pwm	0.47765	0.604824	0.127174
ENCFF743UIM	common-myeloid-progenitor_-CD34-positive	ELF1_HS_SELEX_M5373_1	pwm	0.57743	0.704552	0.127122
ENCFF103UPI	brain	HIC1	kmer	0.466958	0.594068	0.12711
ENCFF059VUS	common-myeloid-progenitor_-CD34-positive	ELF1_HS_SELEX_M5373_1	pwm	0.590864	0.717868	0.127004
ENCFF768WKW	SK-N-DZ	Hbox-III	kmer	0.519508	0.64647	0.126962
ENCFF172LKJ	muscle-of-arm	NFIX_HS_SELEX_M5665_1	pwm	0.551128	0.678002	0.126874
ENCFF218ZFS	brain	RFX	kmer	0.559638	0.68645	0.126812
ENCFF528GDM	brain	TWIST2_MM_PBM_M0177_1	pwm	0.539192	0.665948	0.126756
ENCFF289XSM	CD14-positive-monocyte	RUNX3_HS_SELEX_M5792_1	pwm	0.47667	0.603392	0.126722
ENCFF230CHA	lung	NEUROG2_HS_SELEX_M5653_1	pwm	0.489252	0.615942	0.12669
ENCFF570PDT	hematopoietic-multipotent-progenitor-cell	ELF1_HS_SELEX_M5373_1	pwm	0.554876	0.68153	0.126654
ENCFF365IGK	common-myeloid-progenitor_-CD34-positive	FLI1_HS_SELEX_M5431_1	pwm	0.667456	0.794102	0.126646
ENCFF090PQC	foreskin-fibroblast	NEUROG2_HS_SELEX_M5653_1	pwm	0.492914	0.61954	0.126626
ENCFF263YRO	B-cell	E2A	kmer	0.437488	0.56401	0.126522
ENCFF084LGH	dermis-blood-vessel-endothelial-cell	NFAT	kmer	0.502416	0.628936	0.12652
ENCFF260PQV	OCI-LY7	RUNX3_HS_SELEX_M5792_1	pwm	0.455084	0.58158	0.126496
ENCFF166VSZ	placenta	ESR2_HS_HOCOMOCO_M6219_1	pwm	0.448598	0.57508	0.126482
ENCFF181GIN	placenta	TEA	kmer	0.496072	0.622484	0.126412
ENCFF524XCQ	bipolar-neuron	ZBTB18_HS_SELEX_M5968_1	pwm	0.443652	0.570034	0.126382
ENCFF128BFZ	placenta	TEA	kmer	0.519816	0.646188	0.126372
ENCFF224NMM	brain-microvascular-endothelial-cell	RUNX3_HS_SELEX_M5792_1	pwm	0.55846	0.68482	0.12636
ENCFF941HUI	stomach	FOXB1_HS_SELEX_M5438_1	pwm	0.528194	0.654546	0.126352
ENCFF355JBS	muscle-of-back	NFIX_HS_SELEX_M5665_1	pwm	0.548666	0.675016	0.12635
ENCFF357EZI	lung	NFIX_HS_SELEX_M5665_1	pwm	0.53774	0.664054	0.126314
ENCFF094AUJ	adrenal-gland	bZIP	kmer	0.550318	0.67661	0.126292
ENCFF602BHS	placenta	ESR2_HS_HOCOMOCO_M6219_1	pwm	0.458562	0.584826	0.126264
ENCFF986DGM	hematopoietic-multipotent-progenitor-cell	ZBTB18_HS_SELEX_M5968_1	pwm	0.462112	0.588372	0.12626
ENCFF664QUB	right-lung	NEUROG2_HS_SELEX_M5653_1	pwm	0.479608	0.60584	0.126232
ENCFF559HGO	small-intestine	SNAI2_HS_SELEX_M5809_1	pwm	0.430418	0.556554	0.126136
ENCFF878HVG	NAMALWA	RUNX3_HS_SELEX_M5792_1	pwm	0.478176	0.604222	0.126046
ENCFF572RTJ	muscle-of-leg	NFIX_HS_SELEX_M5665_1	pwm	0.585544	0.711568	0.126024
ENCFF457XYZ	brain	OLIG1_HS_SELEX_M5690_1	pwm	0.47776	0.603708	0.125948
ENCFF611CTG	muscle-of-arm	NFIX_HS_SELEX_M5665_1	pwm	0.585562	0.71138	0.125818
ENCFF530CGM	brain	TWIST2_MM_PBM_M0177_1	pwm	0.478556	0.604294	0.125738
ENCFF794IVB	large-intestine	GLI	kmer	0.417964	0.543576	0.125612
ENCFF311LCN	muscle-of-arm	ZBTB18_HS_SELEX_M5968_1	pwm	0.473502	0.599114	0.125612
ENCFF805JKJ	large-intestine	SNAI2_HS_SELEX_M5809_1	pwm	0.439642	0.565194	0.125552
ENCFF520HRA	H7	TEAD1_HS_SELEX_M5904_1	pwm	0.495586	0.621086	0.1255
ENCFF109VIJ	CD8-positive_-alpha-beta-T-cell	ZNF354C_HS_SELEX_M1950_1	pwm	0.447072	0.572536	0.125464
ENCFF523TKA	muscle-of-arm	NEUROG2_HS_SELEX_M5653_1	pwm	0.455482	0.580944	0.125462
ENCFF581UTE	B-cell	EBF1_HS_SELEX_M5364_1	pwm	0.443396	0.568774	0.125378
ENCFF336OGZ	breast-epithelium	HIC2_HS_SELEX_M5512_1	pwm	0.44648	0.571816	0.125336
ENCFF104JWY	right-lung	NEUROG2_HS_SELEX_M5653_1	pwm	0.496954	0.622218	0.125264
ENCFF602BHS	placenta	TEAD1_HS_SELEX_M5904_1	pwm	0.555864	0.68104	0.125176
ENCFF081UUE	muscle-of-back	NEUROG2_HS_SELEX_M5653_1	pwm	0.50044	0.625578	0.125138
ENCFF837VPM	fibroblast-of-skin-of-left-biceps	RUNX3_HS_SELEX_M5792_1	pwm	0.502116	0.627244	0.125128
ENCFF059HII	left-lung	NFIX_HS_SELEX_M5665_1	pwm	0.559606	0.684708	0.125102
ENCFF701IYS	stomach	HIC2_HS_SELEX_M5512_1	pwm	0.42787	0.552916	0.125046
ENCFF452EGS	LNCaP-clone-FGC	FOX	kmer	0.571914	0.696952	0.125038
ENCFF861DSY	tibial-artery	AP2	kmer	0.449616	0.57451	0.124894
ENCFF446FTN	lung-microvascular-endothelial-cell	ETS	kmer	0.64463	0.769438	0.124808
ENCFF797TTK	heart	GATA	kmer	0.50588	0.630666	0.124786
ENCFF986ZJB	left-lung	NEUROG2_HS_SELEX_M5653_1	pwm	0.487896	0.612658	0.124762
ENCFF191JLB	muscle-of-back	NFAT	kmer	0.519456	0.644188	0.124732
ENCFF196VQQ	large-intestine	HNF4	kmer	0.502906	0.627588	0.124682
ENCFF701IYS	stomach	FOX	kmer	0.501902	0.626572	0.12467
ENCFF331KXA	brain	RFX	kmer	0.540946	0.665574	0.124628
ENCFF894LMB	keratinocyte	P53_HS_SELEX_M6105_1	pwm	0.59574	0.72034	0.1246
ENCFF267VKD	CD1c-positive-myeloid-dendritic-cell	RUNX3_HS_SELEX_M5792_1	pwm	0.455158	0.579704	0.124546
ENCFF156RTG	cardiac-muscle-cell	RUNX3_HS_SELEX_M5792_1	pwm	0.45194	0.576438	0.124498
ENCFF185LPE	HL-60	ETSIII	kmer	0.552602	0.677092	0.12449
ENCFF630VNL	muscle-of-leg	NEUROG2_HS_SELEX_M5653_1	pwm	0.47745	0.601906	0.124456
ENCFF722OVO	brain	HIC1	kmer	0.479168	0.603556	0.124388
ENCFF920DDN	large-intestine	zfC4	kmer	0.43207	0.556404	0.124334
ENCFF704WQC	myotube	TEAD1_HS_SELEX_M5904_1	pwm	0.574572	0.69887	0.124298
ENCFF130KKE	left-lung	NFIX_HS_SELEX_M5665_1	pwm	0.54717	0.671448	0.124278
ENCFF273MVV	GM12878	RUNX3_HS_SELEX_M5792_1	pwm	0.543674	0.66792	0.124246
ENCFF533MFM	trophoblast-cell	GCM	kmer	0.4607	0.584918	0.124218
ENCFF474MZJ	muscle-of-back	NFAT	kmer	0.533406	0.65761	0.124204
ENCFF874KUM	heart	MEIS2_MM_PBM_M0965_1	pwm	0.527402	0.65158	0.124178
ENCFF929VDK	common-myeloid-progenitor_-CD34-positive	E2A	kmer	0.463332	0.58741	0.124078
ENCFF788MXD	smooth-muscle-cell-of-the-brain-vasculature	ZIC	kmer	0.48059	0.604642	0.124052
ENCFF090WJW	cardiovascular-progenitor-cell	ZIC	kmer	0.46052	0.58454	0.12402
ENCFF880QTT	placenta	TEAD1_HS_SELEX_M5904_1	pwm	0.524312	0.648038	0.123726
ENCFF590FZJ	heart	TALE_zfC2H2	kmer	0.520754	0.644458	0.123704
ENCFF734QSB	dermis-microvascular-lymphatic-vessel-endothelial-cell	ETS	kmer	0.64202	0.765714	0.123694
ENCFF058ACJ	large-intestine	HNF4	kmer	0.500164	0.623838	0.123674
ENCFF715BDS	muscle-of-arm	NEUROG2_HS_SELEX_M5653_1	pwm	0.481238	0.604904	0.123666
ENCFF818WPF	lung	NFIX_HS_SELEX_M5665_1	pwm	0.557752	0.68141	0.123658
ENCFF817OHQ	spinal-cord	NFIX_HS_SELEX_M5665_1	pwm	0.549646	0.6733	0.123654
ENCFF704WQC	myotube	TEA	kmer	0.540686	0.66417	0.123484
ENCFF623AFX	K562	GATA6_MM_PBM_M0782_1	pwm	0.573012	0.696482	0.12347
ENCFF581UTE	B-cell	GLI	kmer	0.423244	0.546712	0.123468
ENCFF144XMY	T-helper-2-cell	ZNF354C_HS_SELEX_M1950_1	pwm	0.464084	0.587524	0.12344
ENCFF059HII	left-lung	NEUROG2_HS_SELEX_M5653_1	pwm	0.484716	0.608134	0.123418
ENCFF984RKH	thymus	MYF6_MM_PBM_M0210_1	pwm	0.48791	0.61132	0.12341
ENCFF745COY	GM12865	IRF	kmer	0.515094	0.63849	0.123396
ENCFF663INK	CD8-positive_-alpha-beta-T-cell	TBX5_MM_PBM_M1627_1	pwm	0.472008	0.595296	0.123288
ENCFF488SRU	fibroblast-of-skin-of-left-quadriceps	RUNX3_HS_SELEX_M5792_1	pwm	0.50478	0.628066	0.123286
ENCFF959RZS	GM23248	JUND_HS_SELEX_M0320_1	pwm	0.621552	0.744786	0.123234
ENCFF852NHM	T-helper-2-cell	ZNF354C_HS_SELEX_M1950_1	pwm	0.47146	0.594556	0.123096
ENCFF625XNX	lung	NFIX_HS_SELEX_M5665_1	pwm	0.5662	0.68922	0.12302
ENCFF020LII	muscle-of-leg	NFIX_HS_SELEX_M5665_1	pwm	0.541382	0.664378	0.122996
ENCFF334RSR	fibroblast-of-lung	NEUROG2_HS_SELEX_M5653_1	pwm	0.497944	0.620888	0.122944
ENCFF931JXH	HFFc6	bZIP	kmer	0.55542	0.678352	0.122932
ENCFF250FRA	heart-right-ventricle	MEF2B_HS_SELEX_M5616_1	pwm	0.489912	0.612802	0.12289
ENCFF163TAJ	fibroblast-of-skin-of-scalp	TEA	kmer	0.540438	0.663172	0.122734
ENCFF540HZS	muscle-of-back	NFIX_HS_SELEX_M5665_1	pwm	0.563234	0.685922	0.122688
ENCFF053SED	heart	NFIX_HS_SELEX_M5665_1	pwm	0.55346	0.676148	0.122688
ENCFF397QTB	muscle-of-back	TEA	kmer	0.487214	0.609884	0.12267
ENCFF706BCL	body-of-pancreas	HIC1	kmer	0.465184	0.587844	0.12266
ENCFF897PRD	pancreas	ZBTB18_HS_SELEX_M5968_1	pwm	0.463312	0.585932	0.12262
ENCFF852NHM	T-helper-2-cell	ZSCAN4	kmer	0.457036	0.579642	0.122606
ENCFF991WDM	muscle-of-arm	NEUROG2_HS_SELEX_M5653_1	pwm	0.458818	0.58134	0.122522
ENCFF856BCY	common-myeloid-progenitor_-CD34-positive	ETS	kmer	0.668592	0.791038	0.122446
ENCFF602XCK	naive-thymus-derived-CD4-positive_-alpha-beta-T-cell	ELF1_HS_SELEX_M5373_1	pwm	0.565786	0.68816	0.122374
ENCFF959FMP	thymus	TBX5_MM_PBM_M1627_1	pwm	0.442162	0.564476	0.122314
ENCFF528GDM	brain	NFIA_HS_SELEX_M5661_1	pwm	0.526546	0.648854	0.122308
ENCFF446FTN	lung-microvascular-endothelial-cell	ELF1_HS_SELEX_M5373_1	pwm	0.595852	0.718108	0.122256
ENCFF241GBQ	hematopoietic-multipotent-progenitor-cell	ETS	kmer	0.640874	0.763056	0.122182
ENCFF753RBC	spinal-cord	RFX4primary_MM_PBM	pwm	0.525752	0.647778	0.122026
ENCFF780DOD	dermis-blood-vessel-endothelial-cell	FLI1_HS_SELEX_M5431_1	pwm	0.702288	0.824282	0.121994
ENCFF713OZX	L1-S8R	SOXC	kmer	0.50706	0.628968	0.121908
ENCFF523BCF	psoas-muscle	NEUROG2_HS_SELEX_M5653_1	pwm	0.468184	0.590076	0.121892
ENCFF725QIG	common-myeloid-progenitor_-CD34-positive	NEUROG2_HS_SELEX_M5653_1	pwm	0.467048	0.588912	0.121864
ENCFF520HRA	H7	ZIC	kmer	0.49626	0.61803	0.12177
ENCFF941HUI	stomach	FOXA2_MM_PBM_M0729_1	pwm	0.568524	0.690176	0.121652
ENCFF698ZFJ	astrocyte-of-the-hippocampus	TEA	kmer	0.500032	0.621668	0.121636
ENCFF110CYC	common-myeloid-progenitor_-CD34-positive	ETS	kmer	0.651312	0.772718	0.121406
ENCFF007RSQ	heart	MEIS2_MM_PBM_M0965_1	pwm	0.554658	0.676046	0.121388
ENCFF654MRJ	T-helper-1-cell	ELF1_HS_SELEX_M5373_1	pwm	0.590006	0.71132	0.121314
ENCFF452EGS	LNCaP-clone-FGC	FOXB1_HS_SELEX_M5438_1	pwm	0.578164	0.699244	0.12108
ENCFF403PJS	B-cell	E2A	kmer	0.446736	0.567776	0.12104
ENCFF304GVP	Jurkat-clone-E61	NEUROG2_HS_SELEX_M5653_1	pwm	0.481766	0.602784	0.121018
ENCFF829ZEZ	adrenal-gland	THRA_HS_HOKOMOKO_M6521_1	pwm	0.476118	0.597114	0.120996
ENCFF055ZSF	Peyers-patch	GLI	kmer	0.417888	0.53873	0.120842
ENCFF734QSB	dermis-microvascular-lymphatic-vessel-endothelial-cell	ELF1_HS_SELEX_M5373_1	pwm	0.585688	0.706504	0.120816
ENCFF228YKV	HCT116	bZIP	kmer	0.589872	0.710612	0.12074
ENCFF541GPX	Caco-2	PLAGL1	kmer	0.462584	0.583312	0.120728
ENCFF856BCY	common-myeloid-progenitor_-CD34-positive	ELF1_HS_SELEX_M5373_1	pwm	0.623652	0.74436	0.120708
ENCFF403PJS	B-cell	RUNX3_HS_SELEX_M5792_1	pwm	0.497774	0.618464	0.12069
ENCFF941FIK	small-intestine	HNF4	kmer	0.5029	0.623552	0.120652
ENCFF959FMP	thymus	ZNF354C_HS_SELEX_M1950_1	pwm	0.47066	0.591292	0.120632
ENCFF744LRT	lung	NEUROG2_HS_SELEX_M5653_1	pwm	0.53208	0.65268	0.1206
ENCFF103OZQ	islet-precursor-cell	TEAD1_HS_SELEX_M5904_1	pwm	0.51186	0.63237	0.12051
ENCFF599BMR	small-intestine	THRA_HS_HOKOMOKO_M6521_1	pwm	0.451718	0.572186	0.120468
ENCFF474QAJ	fibroblast-of-skin-of-left-quadriceps	NEUROG2_HS_SELEX_M5653_1	pwm	0.476792	0.597206	0.120414
ENCFF880KWE	thymus	FLI1_HS_SELEX_M5431_1	pwm	0.570934	0.691244	0.12031
ENCFF703UHS	CD4-positive_-alpha-beta-T-cell	FLI1_HS_SELEX_M5431_1	pwm	0.566906	0.68719	0.120284
ENCFF583HUF	muscle-of-back	MYF6_MM_PBM_M0210_1	pwm	0.491964	0.61224	0.120276
ENCFF854EJY	common-myeloid-progenitor_-CD34-positive	ZBTB18_HS_SELEX_M5968_1	pwm	0.465008	0.585248	0.12024
ENCFF847WTW	muscle-of-back	NFAT	kmer	0.499238	0.619466	0.120228
ENCFF663DTX	large-intestine	THRA_HS_HOKOMOKO_M6521_1	pwm	0.45516	0.575378	0.120218
ENCFF899ISV	ELR	TEAD1_HS_SELEX_M5904_1	pwm	0.520742	0.640932	0.12019
ENCFF355JBS	muscle-of-back	ZBTB18_HS_SELEX_M5968_1	pwm	0.48904	0.609144	0.120104
ENCFF276FKY	large-intestine	SNAI2_HS_SELEX_M5809_1	pwm	0.44301	0.563072	0.120062
ENCFF666SXY	thyroid-gland	SNAI2_HS_SELEX_M5809_1	pwm	0.428654	0.54871	0.120056
ENCFF732XMH	Peyers-patch	TBX5_MM_PBM_M1627_1	pwm	0.453146	0.573196	0.12005
ENCFF409QXF	heart-left-ventricle	GATA	kmer	0.509506	0.62947	0.119964
ENCFF304GVP	Jurkat-clone-E61	ZBTB18_HS_SELEX_M5968_1	pwm	0.49122	0.611158	0.119938
ENCFF659BCP	muscle-of-leg	MYF6_MM_PBM_M0210_1	pwm	0.491538	0.611408	0.11987
ENCFF055ZSF	Peyers-patch	ZFP959	kmer	0.452338	0.572116	0.119778
ENCFF250FRA	heart-right-ventricle	NFIX_HS_SELEX_M5665_1	pwm	0.521162	0.640916	0.119754
ENCFF822FIY	hematopoietic-multipotent-progenitor-cell	ZNF354C_HS_SELEX_M1950_1	pwm	0.435464	0.555194	0.11973
ENCFF874KUM	heart	NFIX_HS_SELEX_M5665_1	pwm	0.529098	0.64878	0.119682
ENCFF768WKW	SK-N-DZ	VENTXselex_HS_SELEX_M5947_1	pwm	0.5296	0.649214	0.119614
ENCFF303THQ	brain	RFX	kmer	0.570232	0.6898	0.119568
ENCFF690DRM	left-lung	NFIX_HS_SELEX_M5665_1	pwm	0.593724	0.71329	0.119566
ENCFF286LYP	liver	GLI	kmer	0.416532	0.536044	0.119512
ENCFF207IYJ	brain	NFIX_HS_SELEX_M5665_1	pwm	0.554848	0.67435	0.119502
ENCFF715BDS	muscle-of-arm	MYF6_MM_PBM_M0210_1	pwm	0.495936	0.61536	0.119424
ENCFF767JPZ	HepG2	AP2	kmer	0.454532	0.573944	0.119412
ENCFF874KUM	heart	TALE_zfC2H2	kmer	0.518946	0.638338	0.119392
ENCFF241GBQ	hematopoietic-multipotent-progenitor-cell	ZBTB18_HS_SELEX_M5968_1	pwm	0.454062	0.573386	0.119324
ENCFF722OVO	brain	OLIG1_HS_SELEX_M5690_1	pwm	0.498892	0.618186	0.119294
ENCFF767JPZ	HepG2	RXRG_MM_PBM_M1440_1	pwm	0.434434	0.55366	0.119226
ENCFF583HUF	muscle-of-back	NFIX_HS_SELEX_M5665_1	pwm	0.572676	0.6919	0.119224
ENCFF081UUE	muscle-of-back	NFIX_HS_SELEX_M5665_1	pwm	0.570862	0.689862	0.119
ENCFF883WWT	ovary	FOX	kmer	0.490924	0.609886	0.118962
ENCFF332PPZ	muscle-of-arm	NFIX_HS_SELEX_M5665_1	pwm	0.586658	0.70558	0.118922
ENCFF263YRO	B-cell	EBF1_HS_SELEX_M5364_1	pwm	0.450926	0.56979	0.118864
ENCFF216NXR	T-cell	FLI1_HS_SELEX_M5431_1	pwm	0.586232	0.705088	0.118856
ENCFF652LBV	cardiac-myoblast	TFAP2A_HS_SELEX_M5912_1	pwm	0.43884	0.557534	0.118694
ENCFF794IVB	large-intestine	EGR	kmer	0.443096	0.561698	0.118602
ENCFF448DSH	muscle-of-trunk	NFIX_HS_SELEX_M5665_1	pwm	0.569084	0.687678	0.118594
ENCFF402DMO	retina	TALE_zfC2H2	kmer	0.493258	0.61184	0.118582
ENCFF321LTV	small-intestine	RXRG_MM_PBM_M1440_1	pwm	0.48756	0.606134	0.118574
9	iPS-DF-6	ZIC1_HS_SELEX_M5963_1	pwm	0.47047	0.58903	0.11856
ENCFF659BCP	muscle-of-leg	NFAT	kmer	0.547698	0.666168	0.11847
ENCFF701IYS	stomach	SNAI2_HS_SELEX_M5809_1	pwm	0.429492	0.54795	0.118458
ENCFF789TOW	spinal-cord	NFIX_HS_SELEX_M5665_1	pwm	0.61118	0.72963	0.11845
ENCFF654MRJ	T-helper-1-cell	GLI2_HS_SELEX_M5489_1	pwm	0.46428	0.582722	0.118442
ENCFF402DMO	retina	RFX4primary_MM_PBM	pwm	0.508	0.62642	0.11842
ENCFF319CPJ	muscle-of-leg	NEUROG2_HS_SELEX_M5653_1	pwm	0.48714	0.60555	0.11841
ENCFF643IDL	HFFc6	RUNX3_HS_SELEX_M5792_1	pwm	0.47283	0.591228	0.118398
ENCFF193PBQ	heart	NFIX_HS_SELEX_M5665_1	pwm	0.538188	0.656582	0.118394
ENCFF334RSR	fibroblast-of-lung	ZBTB18_HS_SELEX_M5968_1	pwm	0.472806	0.591196	0.11839
ENCFF711VFJ	muscle-of-arm	NFIX_HS_SELEX_M5665_1	pwm	0.57886	0.697156	0.118296
ENCFF711VFJ	muscle-of-arm	NFAT	kmer	0.55168	0.66989	0.11821
ENCFF460ZFL	lung-microvascular-endothelial-cell	NFATC2_HS_PBM_M1518_1	pwm	0.556108	0.674296	0.118188
ENCFF097KBE	endothelial-cell-of-umbilical-vein	SOX4_HS_PBM_M1578_1	pwm	0.472376	0.590518	0.118142
ENCFF559HGO	small-intestine	GLI	kmer	0.405758	0.52383	0.118072
ENCFF888NOP	muscle-of-arm	NFAT	kmer	0.528158	0.6462	0.118042
ENCFF422GYH	heart	MEIS2_MM_PBM_M0965_1	pwm	0.552202	0.67023	0.118028
ENCFF110CYC	common-myeloid-progenitor_-CD34-positive	E2A	kmer	0.449348	0.567354	0.118006
ENCFF866SPM	hematopoietic-multipotent-progenitor-cell	FLI1_HS_SELEX_M5431_1	pwm	0.541238	0.659234	0.117996
ENCFF023ZMS	CD4-positive_-alpha-beta-T-cell	EGR	kmer	0.428138	0.54608	0.117942
ENCFF090PQC	foreskin-fibroblast	RUNX3_HS_SELEX_M5792_1	pwm	0.458068	0.575998	0.11793
ENCFF805BEX	heart	MEIS2_MM_PBM_M0965_1	pwm	0.571604	0.689408	0.117804
ENCFF572RTJ	muscle-of-leg	NEUROG2_HS_SELEX_M5653_1	pwm	0.485468	0.603268	0.1178
ENCFF428OZI	right-lung	ZBTB18_HS_SELEX_M5968_1	pwm	0.48076	0.59852	0.11776
ENCFF722OVO	brain	NEUROG2_HS_SELEX_M5653_1	pwm	0.498674	0.616422	0.117748
ENCFF910QEB	HepG2	zfC4	kmer	0.444372	0.562108	0.117736
ENCFF193PBQ	heart	TALE_zfC2H2	kmer	0.56701	0.684744	0.117734
ENCFF753RBC	spinal-cord	NFIX_HS_SELEX_M5665_1	pwm	0.535526	0.653244	0.117718
ENCFF652KUN	right-renal-pelvis	zfCXXC_SAND	kmer	0.424344	0.542058	0.117714
ENCFF241GBQ	hematopoietic-multipotent-progenitor-cell	ETSIII	kmer	0.531926	0.649548	0.117622
ENCFF904HGV	brain	RFX4primary_MM_PBM	pwm	0.5208	0.638368	0.117568
ENCFF788MXD	smooth-muscle-cell-of-the-brain-vasculature	ZBTB18_HS_SELEX_M5968_1	pwm	0.45372	0.57128	0.11756
ENCFF888NOP	muscle-of-arm	NFIX_HS_SELEX_M5665_1	pwm	0.565084	0.682628	0.117544
ENCFF805JKJ	large-intestine	FOXB1_HS_SELEX_M5438_1	pwm	0.482024	0.599548	0.117524
ENCFF836ETB	muscle-of-trunk	NFIX_HS_SELEX_M5665_1	pwm	0.5423	0.659776	0.117476
ENCFF393CAW	HFF-Myc	RUNX3_HS_SELEX_M5792_1	pwm	0.49774	0.615166	0.117426
ENCFF655ZJF	placenta	EBF1_HS_SELEX_M5364_1	pwm	0.447756	0.565162	0.117406
ENCFF238GMN	M059J	RUNX3_HS_SELEX_M5792_1	pwm	0.556806	0.674046	0.11724
ENCFF321LTV	small-intestine	SNAI2_HS_SELEX_M5809_1	pwm	0.439152	0.556388	0.117236
ENCFF852NHM	T-helper-2-cell	ELF1_HS_SELEX_M5373_1	pwm	0.575918	0.69313	0.117212
ENCFF216NXR	T-cell	ZNF354C_HS_SELEX_M1950_1	pwm	0.420366	0.537574	0.117208
ENCFF506YRM	NT2_D1	SOX4_HS_PBM_M1578_1	pwm	0.493422	0.610604	0.117182
ENCFF874KUM	heart	MEF2A_HS_SELEX_M5615_1	pwm	0.514664	0.631736	0.117072
ENCFF810YLL	H1	AP2	kmer	0.453164	0.57022	0.117056
ENCFF103OZQ	islet-precursor-cell	TEA	kmer	0.506146	0.62319	0.117044
ENCFF805JKJ	large-intestine	TBX5_MM_PBM_M1627_1	pwm	0.437652	0.55468	0.117028
ENCFF557HFW	placenta	GRHL1_HS_SELEX_M5498_1	pwm	0.552304	0.669276	0.116972
ENCFF099MBG	muscle-of-arm	NFIX_HS_SELEX_M5665_1	pwm	0.574124	0.691012	0.116888
ENCFF097KBE	endothelial-cell-of-umbilical-vein	FOX	kmer	0.507574	0.624424	0.11685
ENCFF931JXH	HFFc6	TEAD1_HS_SELEX_M5904_1	pwm	0.516594	0.63339	0.116796
ENCFF479KXR	foreskin-fibroblast	NEUROG2_HS_SELEX_M5653_1	pwm	0.523668	0.640408	0.11674
ENCFF725QIG	common-myeloid-progenitor_-CD34-positive	ZBTB18_HS_SELEX_M5968_1	pwm	0.450162	0.566872	0.11671
7	iPS-DF-19	POU	kmer	0.511982	0.62868	0.116698
ENCFF336MQK	fibroblast-of-skin-of-left-biceps	OLIG1_HS_SELEX_M5690_1	pwm	0.485606	0.602286	0.11668
ENCFF273MVV	GM12878	IRF	kmer	0.562204	0.678862	0.116658
ENCFF311UAO	fibroblast-of-villous-mesenchyme	RUNX3_HS_SELEX_M5792_1	pwm	0.48417	0.600808	0.116638
ENCFF097RTD	cardiac-muscle-cell	MEIS2_MM_PBM_M0965_1	pwm	0.582154	0.698754	0.1166
ENCFF263YRO	B-cell	RUNX3_HS_SELEX_M5792_1	pwm	0.487314	0.60389	0.116576
ENCFF953MDZ	HAP-1	OTX1_HS_SELEX_M5699_1	pwm	0.528658	0.645204	0.116546
ENCFF704WQC	myotube	NEUROG2_HS_SELEX_M5653_1	pwm	0.504218	0.620736	0.116518
ENCFF171JLD	muscle-of-back	NEUROG2_HS_SELEX_M5653_1	pwm	0.475716	0.592156	0.11644
ENCFF121XJN	upper-lobe-of-left-lung	HIC2_HS_SELEX_M5512_1	pwm	0.438948	0.55536	0.116412
ENCFF097IKA	GM12864	TBX5_MM_PBM_M1627_1	pwm	0.452632	0.569014	0.116382
ENCFF319CPJ	muscle-of-leg	MYF6_MM_PBM_M0210_1	pwm	0.512988	0.629344	0.116356
ENCFF267VKD	CD1c-positive-myeloid-dendritic-cell	EGR	kmer	0.477842	0.594074	0.116232
ENCFF975JLM	right-lung	MYF6_MM_PBM_M0210_1	pwm	0.512684	0.628896	0.116212
ENCFF735APJ	lung	NEUROG2_HS_SELEX_M5653_1	pwm	0.496954	0.613166	0.116212
ENCFF484TLE	transverse-colon	HIC2_HS_SELEX_M5512_1	pwm	0.438648	0.55481	0.116162
ENCFF401SKP	muscle-of-leg	TWIST2_MM_PBM_M0177_1	pwm	0.479224	0.595368	0.116144
ENCFF483RJF	T-helper-17-cell	ZNF354C_HS_SELEX_M1950_1	pwm	0.48407	0.600206	0.116136
ENCFF986ZJB	left-lung	MYF6_MM_PBM_M0210_1	pwm	0.50508	0.621208	0.116128
ENCFF941FIK	small-intestine	THRA_HS_HOKOMOKO_M6521_1	pwm	0.45237	0.568468	0.116098
ENCFF530CGM	brain	RFX4primary_MM_PBM	pwm	0.516886	0.63296	0.116074
ENCFF179WUI	adrenal-gland	TFAP2A_HS_SELEX_M5912_1	pwm	0.463688	0.579728	0.11604
ENCFF215UXZ	adrenal-gland	bZIP	kmer	0.55852	0.674536	0.116016
ENCFF046QJY	right-lung	OLIG1_HS_SELEX_M5690_1	pwm	0.47761	0.593616	0.116006
ENCFF470QNA	muscle-of-leg	NFIX_HS_SELEX_M5665_1	pwm	0.567602	0.68359	0.115988
ENCFF103UPI	brain	NFIA_HS_SELEX_M5661_1	pwm	0.506362	0.622312	0.11595
ENCFF732XMH	Peyers-patch	HNF4A_HS_SELEX_M5524_1	pwm	0.500966	0.616904	0.115938
ENCFF005DMK	placenta	ESR2_HS_HOCOMOCO_M6219_1	pwm	0.458556	0.574474	0.115918
ENCFF814UZW	tongue	NEUROG2_HS_SELEX_M5653_1	pwm	0.498564	0.614482	0.115918
ENCFF378BUF	tibial-artery	NFIX_HS_SELEX_M5665_1	pwm	0.54775	0.663564	0.115814
ENCFF957JQC	lung-microvascular-endothelial-cell	bZIP	kmer	0.556318	0.672114	0.115796
ENCFF520HRA	H7	SOXC	kmer	0.497594	0.61337	0.115776
ENCFF735JRV	pancreas	NFIX_HS_SELEX_M5665_1	pwm	0.603778	0.71953	0.115752
ENCFF768WKW	SK-N-DZ	Hbox-II	kmer	0.540788	0.65647	0.115682
ENCFF687FIQ	heart-right-ventricle	NFIX_HS_SELEX_M5665_1	pwm	0.521886	0.637548	0.115662
ENCFF221FPW	fibroblast-of-villous-mesenchyme	FOX	kmer	0.47874	0.594192	0.115452
ENCFF513DVK	EL	TEA	kmer	0.51559	0.631002	0.115412
ENCFF005DMK	placenta	GRHL1_HS_SELEX_M5498_1	pwm	0.515076	0.630474	0.115398
ENCFF664QUB	right-lung	MYF6_MM_PBM_M0210_1	pwm	0.501562	0.616924	0.115362
ENCFF221FPW	fibroblast-of-villous-mesenchyme	NEUROG2_HS_SELEX_M5653_1	pwm	0.484676	0.600026	0.11535
ENCFF975JLM	right-lung	NEUROG2_HS_SELEX_M5653_1	pwm	0.495342	0.610684	0.115342
ENCFF541GPX	Caco-2	EGR	kmer	0.467446	0.582782	0.115336
ENCFF789TOW	spinal-cord	RFX4primary_MM_PBM	pwm	0.506892	0.622166	0.115274
ENCFF421EQO	placenta	GRHL1_HS_SELEX_M5498_1	pwm	0.522502	0.637762	0.11526
ENCFF688ZSR	Jurkat-clone-E61	ELF1_HS_SELEX_M5373_1	pwm	0.558512	0.67375	0.115238
ENCFF659BCP	muscle-of-leg	NFIX_HS_SELEX_M5665_1	pwm	0.574954	0.690132	0.115178
ENCFF959FMP	thymus	ZBTB18_HS_SELEX_M5968_1	pwm	0.473974	0.589136	0.115162
ENCFF032LRL	foreskin-fibroblast	NEUROG2_HS_SELEX_M5653_1	pwm	0.54279	0.657924	0.115134
ENCFF927KUT	glomerular-endothelial-cell	ELF1_HS_SELEX_M5373_1	pwm	0.608588	0.723662	0.115074
ENCFF897JBO	pulmonary-artery-endothelial-cell	ELF1_HS_SELEX_M5373_1	pwm	0.58685	0.701904	0.115054
ENCFF547ZRE	lung	ZBTB18_HS_SELEX_M5968_1	pwm	0.46032	0.575364	0.115044
ENCFF499HUD	KBM-7	SFPI1_HS_SELEX_M5863_1	pwm	0.633274	0.74831	0.115036
ENCFF230WVU	muscle-of-leg	NFIX_HS_SELEX_M5665_1	pwm	0.575506	0.690486	0.11498
ENCFF096NVD	CD1c-positive-myeloid-dendritic-cell	ETSIII	kmer	0.507836	0.622762	0.114926
ENCFF855CMV	trophoblast-cell	EBF1_HS_SELEX_M5364_1	pwm	0.45006	0.56496	0.1149
ENCFF422GYH	heart	TALE_zfC2H2	kmer	0.523608	0.638458	0.11485
ENCFF696LIK	OCI-LY7	Tbox	kmer	0.472796	0.587482	0.114686
ENCFF498QOJ	ovary	EGR	kmer	0.445752	0.560406	0.114654
ENCFF326SSU	muscle-of-arm	NFAT	kmer	0.546222	0.660834	0.114612
ENCFF046QJY	right-lung	NFIX_HS_SELEX_M5665_1	pwm	0.601674	0.716282	0.114608
ENCFF833HUK	brain-microvascular-endothelial-cell	RUNX3_HS_SELEX_M5792_1	pwm	0.570202	0.684804	0.114602
ENCFF846DFL	MCF-7	GRHL1_HS_SELEX_M5498_1	pwm	0.569578	0.684076	0.114498
ENCFF191WFG	CD4-positive_-alpha-beta-T-cell	ELF1_HS_SELEX_M5373_1	pwm	0.569358	0.683828	0.11447
ENCFF852FLF	thyroid-gland	AP2	kmer	0.445874	0.56024	0.114366
ENCFF758SYE	gastrocnemius-medialis	ESR2_HS_HOCOMOCO_M6219_1	pwm	0.466204	0.580486	0.114282
ENCFF562NMD	muscle-of-trunk	NFAT	kmer	0.510914	0.625154	0.11424
ENCFF854EJY	common-myeloid-progenitor_-CD34-positive	ZNF354C_HS_SELEX_M1950_1	pwm	0.441018	0.555248	0.11423
ENCFF559HGO	small-intestine	HNF4	kmer	0.509634	0.623848	0.114214
ENCFF260PQV	OCI-LY7	ZBTB18_HS_SELEX_M5968_1	pwm	0.460552	0.574732	0.11418
ENCFF805BEX	heart	NFIX_HS_SELEX_M5665_1	pwm	0.572412	0.686578	0.114166
ENCFF672BMB	mammary-epithelial-cell	HLF_HS_SELEX_M5516_1	pwm	0.52097	0.63513	0.11416
ENCFF711IJR	thymus	ZBTB18_HS_SELEX_M5968_1	pwm	0.464832	0.578984	0.114152
ENCFF572AAL	neural-progenitor-cell	SOX4_HS_PBM_M1578_1	pwm	0.476008	0.590116	0.114108
ENCFF719FXT	choroid-plexus-epithelial-cell	RUNX3_HS_SELEX_M5792_1	pwm	0.482124	0.596132	0.114008
ENCFF865LCY	SK-N-DZ	Hbox-II	kmer	0.55296	0.666956	0.113996
ENCFF347YCV	muscle-of-leg	NFIX_HS_SELEX_M5665_1	pwm	0.555488	0.669428	0.11394
ENCFF932FKV	HS-27A	TEA	kmer	0.550746	0.664648	0.113902
ENCFF920DDN	large-intestine	HNF4	kmer	0.509066	0.622966	0.1139
ENCFF263YRO	B-cell	ETSIII	kmer	0.513288	0.627124	0.113836
ENCFF986ZJB	left-lung	NFIX_HS_SELEX_M5665_1	pwm	0.577412	0.691246	0.113834
ENCFF991QFJ	AG04450	NEUROG2_HS_SELEX_M5653_1	pwm	0.498394	0.612226	0.113832
ENCFF692AJW	small-intestine	HNF4	kmer	0.49042	0.604234	0.113814
ENCFF109VIJ	CD8-positive_-alpha-beta-T-cell	FLI1_HS_SELEX_M5431_1	pwm	0.60065	0.714446	0.113796
ENCFF679HWR	large-intestine	THRA_HS_HOKOMOKO_M6521_1	pwm	0.460656	0.574442	0.113786
ENCFF505KHS	HL-60	CEBPB_HS_SELEX_M5314_1	pwm	0.661812	0.775572	0.11376
ENCFF972QQK	brain-pericyte	E2A	kmer	0.446708	0.560422	0.113714
ENCFF560YBU	brain	HIC2_HS_SELEX_M5512_1	pwm	0.46674	0.58044	0.1137
ENCFF289XNF	left-lung	ZBTB18_HS_SELEX_M5968_1	pwm	0.476372	0.590068	0.113696
ENCFF136FZU	right-lung	NFIX_HS_SELEX_M5665_1	pwm	0.57751	0.691114	0.113604
ENCFF195KNE	T-helper-1-cell	ETS	kmer	0.603264	0.71682	0.113556
ENCFF488SRU	fibroblast-of-skin-of-left-quadriceps	ZBTB18_HS_SELEX_M5968_1	pwm	0.468456	0.581988	0.113532
ENCFF941HUI	stomach	GATA	kmer	0.499772	0.61329	0.113518
ENCFF590FZJ	heart	HIC1	kmer	0.464556	0.578054	0.113498
ENCFF169THH	foreskin-fibroblast	ZBTB18_HS_SELEX_M5968_1	pwm	0.46765	0.58112	0.11347
ENCFF021ZDC	coronary-artery	NFIX_HS_SELEX_M5665_1	pwm	0.5619	0.675308	0.113408
ENCFF785PSO	muscle-of-back	NFAT	kmer	0.485486	0.598714	0.113228
ENCFF856BCY	common-myeloid-progenitor_-CD34-positive	MYF6_MM_PBM_M0210_1	pwm	0.522964	0.636174	0.11321
ENCFF409QXF	heart-left-ventricle	FOXB1_HS_SELEX_M5438_1	pwm	0.488776	0.601952	0.113176
ENCFF688ZSR	Jurkat-clone-E61	ZNF354C_HS_SELEX_M1950_1	pwm	0.460046	0.573122	0.113076
ENCFF880QTT	placenta	TEA	kmer	0.496972	0.60985	0.112878
ENCFF260PQV	OCI-LY7	GLI	kmer	0.42014	0.533014	0.112874
ENCFF147CSC	BE2C	AP2	kmer	0.488572	0.60134	0.112768
ENCFF366UHV	dermis-microvascular-lymphatic-vessel-endothelial-cell	FOX	kmer	0.525046	0.63776	0.112714
ENCFF369ALL	WI38	FOXA2_MM_PBM_M0729_1	pwm	0.529178	0.641874	0.112696
ENCFF215UXZ	adrenal-gland	JUND_HS_SELEX_M0320_1	pwm	0.584106	0.696766	0.11266
ENCFF230SPN	neural-progenitor-cell	SOX4_HS_PBM_M1578_1	pwm	0.484024	0.59668	0.112656
ENCFF711IJR	thymus	TBX5_MM_PBM_M1627_1	pwm	0.454914	0.567532	0.112618
ENCFF588SBI	muscle-of-arm	NFAT	kmer	0.523206	0.63575	0.112544
ENCFF710SFP	NAMALWA	NEUROG2_HS_SELEX_M5653_1	pwm	0.498266	0.61079	0.112524
ENCFF991QFJ	AG04450	MYF6_MM_PBM_M0210_1	pwm	0.505614	0.618064	0.11245
ENCFF827RCC	left-lung	NEUROG2_HS_SELEX_M5653_1	pwm	0.514268	0.62659	0.112322
ENCFF422GYH	heart	GATA	kmer	0.49336	0.605664	0.112304
ENCFF533MFM	trophoblast-cell	EBF1_HS_SELEX_M5364_1	pwm	0.463552	0.575824	0.112272
ENCFF055ZSF	Peyers-patch	AP2	kmer	0.4598	0.57203	0.11223
ENCFF307VFD	muscle-of-arm	NFATC2_HS_PBM_M1518_1	pwm	0.58435	0.696578	0.112228
ENCFF274FLT	lung	NEUROG2_HS_SELEX_M5653_1	pwm	0.528684	0.640886	0.112202
ENCFF929VDK	common-myeloid-progenitor_-CD34-positive	ETS	kmer	0.667624	0.779796	0.112172
ENCFF512IPA	choroid-plexus-epithelial-cell	RUNX3_HS_SELEX_M5792_1	pwm	0.491446	0.603528	0.112082
ENCFF611CTG	muscle-of-arm	OLIG1_HS_SELEX_M5690_1	pwm	0.494424	0.606504	0.11208
ENCFF614FYH	dermis-blood-vessel-endothelial-cell	STAT1_HS_CHIPSEQ_M1955_1	pwm	0.482748	0.594816	0.112068
ENCFF276FKY	large-intestine	HNF4	kmer	0.516644	0.628702	0.112058
ENCFF735JRV	pancreas	HIC2_HS_SELEX_M5512_1	pwm	0.460198	0.572228	0.11203
ENCFF059VUS	common-myeloid-progenitor_-CD34-positive	OLIG1_HS_SELEX_M5690_1	pwm	0.498	0.610016	0.112016
ENCFF878HVG	NAMALWA	NEUROG2_HS_SELEX_M5653_1	pwm	0.502038	0.614012	0.111974
ENCFF623AFX	K562	PLAGL1	kmer	0.49131	0.603264	0.111954
ENCFF357EZI	lung	NEUROG2_HS_SELEX_M5653_1	pwm	0.471152	0.583056	0.111904
ENCFF870MCD	H7	ZIC	kmer	0.470808	0.582686	0.111878
ENCFF865LCY	SK-N-DZ	Hbox-III	kmer	0.530734	0.64258	0.111846
ENCFF583HUF	muscle-of-back	NEUROG2_HS_SELEX_M5653_1	pwm	0.46907	0.580802	0.111732
ENCFF442AYJ	small-intestine	HNF4	kmer	0.506044	0.617752	0.111708
ENCFF837VPM	fibroblast-of-skin-of-left-biceps	NEUROG2_HS_SELEX_M5653_1	pwm	0.48984	0.60147	0.11163
ENCFF855CMV	trophoblast-cell	E2A	kmer	0.466684	0.57831	0.111626
ENCFF664DCZ	cardiac-muscle-cell	TBX5_MM_PBM_M1627_1	pwm	0.4323	0.543864	0.111564
ENCFF233TRB	left-lung	MYF6_MM_PBM_M0210_1	pwm	0.525474	0.636958	0.111484
ENCFF608WCU	epithelial-cell-of-prostate	P53_HS_SELEX_M6105_1	pwm	0.583326	0.694806	0.11148
ENCFF050XEY	kidney	GLI	kmer	0.42214	0.533554	0.111414
ENCFF171JLD	muscle-of-back	NFIX_HS_SELEX_M5665_1	pwm	0.56714	0.678542	0.111402
ENCFF470QNA	muscle-of-leg	OLIG1_HS_SELEX_M5690_1	pwm	0.472672	0.58394	0.111268
ENCFF382GKE	MCF-7	GRHL1_HS_SELEX_M5498_1	pwm	0.593812	0.705078	0.111266
ENCFF663LIJ	left-lung	OLIG1_HS_SELEX_M5690_1	pwm	0.50503	0.616242	0.111212
ENCFF520HKD	heart-left-ventricle	NFIX_HS_SELEX_M5665_1	pwm	0.52985	0.641008	0.111158
ENCFF555ZGP	large-intestine	HNF4	kmer	0.506244	0.617366	0.111122
ENCFF084LGH	dermis-blood-vessel-endothelial-cell	THRA_HS_HOKOMOKO_M6521_1	pwm	0.448292	0.55939	0.111098
ENCFF005DMK	placenta	GCM	kmer	0.445862	0.55694	0.111078
ENCFF357EZI	lung	ZBTB18_HS_SELEX_M5968_1	pwm	0.471974	0.583016	0.111042
ENCFF643IDL	HFFc6	TEAD1_HS_SELEX_M5904_1	pwm	0.51061	0.621634	0.111024
ENCFF012QDX	T-helper-1-cell	ZNF354C_HS_SELEX_M1950_1	pwm	0.51874	0.62975	0.11101
ENCFF063MTX	fibroblast-of-gingiva	NEUROG2_HS_SELEX_M5653_1	pwm	0.515324	0.626264	0.11094
ENCFF806PZH	LNCaP-clone-FGC	NFIA_HS_SELEX_M5661_1	pwm	0.54364	0.654512	0.110872
ENCFF866SPM	hematopoietic-multipotent-progenitor-cell	EGR	kmer	0.451994	0.562824	0.11083
ENCFF116OFN	thyroid-gland	NKX-II	kmer	0.505172	0.615968	0.110796
ENCFF012QDX	T-helper-1-cell	FOX	kmer	0.497156	0.607912	0.110756
ENCFF959FMP	thymus	FLI1_HS_SELEX_M5431_1	pwm	0.602568	0.713304	0.110736
ENCFF732XMH	Peyers-patch	HIC2_HS_SELEX_M5512_1	pwm	0.444348	0.555066	0.110718
ENCFF957JQC	lung-microvascular-endothelial-cell	JUND_HS_SELEX_M0320_1	pwm	0.59479	0.705468	0.110678
ENCFF196VQQ	large-intestine	SNAI2_HS_SELEX_M5809_1	pwm	0.450992	0.561652	0.11066
ENCFF871GML	heart	FOXB1_HS_SELEX_M5438_1	pwm	0.483628	0.594278	0.11065
ENCFF734QSB	dermis-microvascular-lymphatic-vessel-endothelial-cell	NFAT	kmer	0.543436	0.654074	0.110638
ENCFF104JWY	right-lung	FOX	kmer	0.482944	0.593508	0.110564
ENCFF319CPJ	muscle-of-leg	NFIX_HS_SELEX_M5665_1	pwm	0.579368	0.689928	0.11056
ENCFF241GBQ	hematopoietic-multipotent-progenitor-cell	OLIG1_HS_SELEX_M5690_1	pwm	0.463128	0.573678	0.11055
ENCFF311LCN	muscle-of-arm	NEUROG2_HS_SELEX_M5653_1	pwm	0.470176	0.580724	0.110548
ENCFF614FYH	dermis-blood-vessel-endothelial-cell	SOX	kmer	0.502376	0.612914	0.110538
ENCFF672BMB	mammary-epithelial-cell	NR2E	kmer	0.509126	0.61962	0.110494
ENCFF599BMR	small-intestine	SNAI2_HS_SELEX_M5809_1	pwm	0.433774	0.544266	0.110492
ENCFF540HZS	muscle-of-back	NEUROG2_HS_SELEX_M5653_1	pwm	0.48216	0.592624	0.110464
ENCFF332PPZ	muscle-of-arm	OLIG1_HS_SELEX_M5690_1	pwm	0.47808	0.588526	0.110446
ENCFF128BFZ	placenta	GRHL1_HS_SELEX_M5498_1	pwm	0.555346	0.66577	0.110424
ENCFF991QFJ	AG04450	TEAD1_HS_SELEX_M5904_1	pwm	0.515152	0.625568	0.110416
ENCFF481KKG	T-helper-2-cell	GLI2_HS_SELEX_M5489_1	pwm	0.450556	0.56096	0.110404
ENCFF142WAA	transverse-colon	SNAI2_HS_SELEX_M5809_1	pwm	0.46887	0.579098	0.110228
ENCFF594OFO	fibroblast-of-skin-of-scalp	TEA	kmer	0.548278	0.658498	0.11022
ENCFF397QTB	muscle-of-back	RUNX3_HS_SELEX_M5792_1	pwm	0.463536	0.573648	0.110112
ENCFF665HCW	GM23248	JUND_HS_SELEX_M0320_1	pwm	0.654796	0.764858	0.110062
ENCFF505KHS	HL-60	FLI1_HS_SELEX_M5431_1	pwm	0.581918	0.691958	0.11004
ENCFF382GKE	MCF-7	SNAI2_HS_SELEX_M5809_1	pwm	0.499864	0.609858	0.109994
ENCFF096NVD	CD1c-positive-myeloid-dendritic-cell	GLI	kmer	0.420974	0.530954	0.10998
ENCFF004PBJ	GM12865	PRDM1_HS_SELEX_M5749_1	pwm	0.50171	0.611642	0.109932
ENCFF327HDP	heart	NFIX_HS_SELEX_M5665_1	pwm	0.623276	0.73317	0.109894
ENCFF562ESR	transverse-colon	Tbox	kmer	0.47956	0.589438	0.109878
ENCFF611CTG	muscle-of-arm	TWIST2_MM_PBM_M0177_1	pwm	0.483248	0.593046	0.109798
ENCFF116OFN	thyroid-gland	FOX	kmer	0.478756	0.588524	0.109768
ENCFF189LKP	thymus	GCM1_HS_SELEX_M5484_1	pwm	0.424608	0.534364	0.109756
ENCFF810YLL	H1	ZIC1_HS_SELEX_M5963_1	pwm	0.47596	0.585668	0.109708
ENCFF991QFJ	AG04450	ZBTB18_HS_SELEX_M5968_1	pwm	0.473592	0.583168	0.109576
ENCFF566JBQ	keratinocyte	P53_HS_SELEX_M6105_1	pwm	0.60308	0.712634	0.109554
ENCFF321LTV	small-intestine	zfC4	kmer	0.476604	0.586136	0.109532
ENCFF045KGY	fibroblast-of-skin-of-abdomen	TEAD1_HS_SELEX_M5904_1	pwm	0.552872	0.662388	0.109516
ENCFF061UBG	thymus	GCM	kmer	0.433546	0.542932	0.109386
ENCFF552CWN	bronchial-epithelial-cell	AR_MM_PBM_M1456_1	pwm	0.462966	0.572322	0.109356
ENCFF057PEY	astrocyte-of-the-cerebellum	ZNF354C_HS_SELEX_M1950_1	pwm	0.461506	0.570844	0.109338
ENCFF365IGK	common-myeloid-progenitor_-CD34-positive	MYF6_MM_PBM_M0210_1	pwm	0.515216	0.624512	0.109296
ENCFF034CJK	AG09309	RUNX3_HS_SELEX_M5792_1	pwm	0.530792	0.640076	0.109284
ENCFF663DTX	large-intestine	TBX5_MM_PBM_M1627_1	pwm	0.437996	0.54726	0.109264
ENCFF557HFW	placenta	TFCP2_HS_SELEX_M5928_1	pwm	0.545458	0.654698	0.10924
ENCFF322ZNH	brain	NFIX_HS_SELEX_M5665_1	pwm	0.582938	0.692172	0.109234
ENCFF097LEF	GM12878	GLI2_HS_SELEX_M5489_1	pwm	0.445846	0.555048	0.109202
ENCFF184TWB	epithelial-cell-of-esophagus	P53_HS_SELEX_M6105_1	pwm	0.62848	0.737648	0.109168
ENCFF073TWU	fibroblast-of-skin-of-upper-back	TEAD1_HS_SELEX_M5904_1	pwm	0.568126	0.677294	0.109168
ENCFF672BMB	mammary-epithelial-cell	TBX5_MM_PBM_M1627_1	pwm	0.441646	0.550806	0.10916
ENCFF097KBE	endothelial-cell-of-umbilical-vein	ELF1_HS_SELEX_M5373_1	pwm	0.56863	0.677768	0.109138
ENCFF811FJV	foreskin-fibroblast	NEUROG2_HS_SELEX_M5653_1	pwm	0.4971	0.606192	0.109092
ENCFF334RSR	fibroblast-of-lung	MYF6_MM_PBM_M0210_1	pwm	0.505008	0.614082	0.109074
ENCFF488SRU	fibroblast-of-skin-of-left-quadriceps	NEUROG2_HS_SELEX_M5653_1	pwm	0.49744	0.606504	0.109064
ENCFF560YBU	brain	MEIS2_MM_PBM_M0965_1	pwm	0.524814	0.633804	0.10899
ENCFF663INK	CD8-positive_-alpha-beta-T-cell	ELF1_HS_SELEX_M5373_1	pwm	0.578342	0.687264	0.108922
ENCFF696LIK	OCI-LY7	SNAI	kmer	0.478252	0.58717	0.108918
ENCFF662JPI	astrocyte-of-the-hippocampus	TEA	kmer	0.52097	0.629838	0.108868
ENCFF840ZTK	natural-killer-cell	ZNF354C_HS_SELEX_M1950_1	pwm	0.46083	0.569658	0.108828
ENCFF021ZDC	coronary-artery	AP2	kmer	0.472008	0.580762	0.108754
ENCFF241GBQ	hematopoietic-multipotent-progenitor-cell	SFPI1_HS_SELEX_M5863_1	pwm	0.536912	0.645572	0.10866
ENCFF917YWY	small-intestine	TBX5_MM_PBM_M1627_1	pwm	0.445972	0.554616	0.108644
ENCFF794IVB	large-intestine	HNF4A_HS_SELEX_M5524_1	pwm	0.493984	0.602624	0.10864
11	iPS-DF-19	SOX4_HS_PBM_M1578_1	pwm	0.498942	0.60758	0.108638
ENCFF897PRD	pancreas	FOX	kmer	0.511122	0.619758	0.108636
ENCFF388FUA	common-myeloid-progenitor_-CD34-positive	ZBTB18_HS_SELEX_M5968_1	pwm	0.476528	0.585154	0.108626
ENCFF495SEM	hematopoietic-multipotent-progenitor-cell	ELF1_HS_SELEX_M5373_1	pwm	0.566744	0.675304	0.10856
ENCFF365IGK	common-myeloid-progenitor_-CD34-positive	E2A	kmer	0.455774	0.56429	0.108516
ENCFF401SKP	muscle-of-leg	OLIG1_HS_SELEX_M5690_1	pwm	0.486272	0.594758	0.108486
ENCFF288VDM	kidney	CENP_zfCXXC	kmer	0.453142	0.561618	0.108476
ENCFF081UUE	muscle-of-back	OLIG1_HS_SELEX_M5690_1	pwm	0.48068	0.589064	0.108384
ENCFF794IVB	large-intestine	TFAP2A_HS_SELEX_M5912_1	pwm	0.454966	0.56334	0.108374
ENCFF507FBF	AG09319	NEUROG2_HS_SELEX_M5653_1	pwm	0.493278	0.601648	0.10837
ENCFF602BHS	placenta	TEA	kmer	0.542716	0.651066	0.10835
ENCFF413SVK	AG09319	ZBTB18_HS_SELEX_M5968_1	pwm	0.454988	0.563252	0.108264
ENCFF402DMO	retina	MEIS2_MM_PBM_M0965_1	pwm	0.521666	0.629868	0.108202
ENCFF287SCA	GM04504	RUNX3_HS_SELEX_M5792_1	pwm	0.473014	0.581202	0.108188
ENCFF481KKG	T-helper-2-cell	ELF1_HS_SELEX_M5373_1	pwm	0.576688	0.684862	0.108174
ENCFF599BMR	small-intestine	TBX5_MM_PBM_M1627_1	pwm	0.452496	0.560576	0.10808
ENCFF090WJW	cardiovascular-progenitor-cell	GATA	kmer	0.504014	0.612078	0.108064
ENCFF883WWT	ovary	ZBTB12_MM_PBM_M0433_1	pwm	0.457384	0.56539	0.108006
ENCFF402DMO	retina	Hbox-II	kmer	0.50351	0.611402	0.107892
7	iPS-DF-4	POU	kmer	0.50238	0.610238	0.107858
ENCFF701IYS	stomach	FOXB1_HS_SELEX_M5438_1	pwm	0.506574	0.614366	0.107792
ENCFF866SPM	hematopoietic-multipotent-progenitor-cell	RUNX3_HS_SELEX_M5792_1	pwm	0.515666	0.623454	0.107788
ENCFF644XOI	fibroblast-of-lung	NEUROG2_HS_SELEX_M5653_1	pwm	0.511346	0.61911	0.107764
ENCFF495SEM	hematopoietic-multipotent-progenitor-cell	ETS	kmer	0.617254	0.724972	0.107718
ENCFF991QFJ	AG04450	FOX	kmer	0.494736	0.602454	0.107718
ENCFF722CYJ	small-intestine	HNF4	kmer	0.501258	0.608938	0.10768
ENCFF414BFO	muscle-of-back	NEUROG2_HS_SELEX_M5653_1	pwm	0.484096	0.591772	0.107676
ENCFF962IGI	skeletal-muscle-myoblast	NEUROG2_HS_SELEX_M5653_1	pwm	0.527	0.634666	0.107666
ENCFF899ISV	ELR	JUND_HS_SELEX_M0320_1	pwm	0.693586	0.801118	0.107532
ENCFF654MRJ	T-helper-1-cell	TBX5_MM_PBM_M1627_1	pwm	0.479416	0.586938	0.107522
ENCFF797QID	muscle-of-back	NFAT	kmer	0.501068	0.608586	0.107518
ENCFF288VDM	kidney	zfCXXC_SAND	kmer	0.453984	0.561498	0.107514
ENCFF996VLV	muscle-of-arm	NEUROG2_HS_SELEX_M5653_1	pwm	0.484644	0.592154	0.10751
ENCFF215RET	kidney	TFAP2A_HS_SELEX_M5912_1	pwm	0.450432	0.557938	0.107506
ENCFF735JRV	pancreas	FOX	kmer	0.491502	0.599004	0.107502
ENCFF696LIK	OCI-LY7	FLI1_HS_SELEX_M5431_1	pwm	0.584326	0.691822	0.107496
ENCFF495SEM	hematopoietic-multipotent-progenitor-cell	GATA	kmer	0.497756	0.605232	0.107476
ENCFF663DTX	large-intestine	HNF4	kmer	0.518446	0.625914	0.107468
ENCFF319ZSH	adrenal-gland	ESRR-II	kmer	0.485658	0.593124	0.107466
ENCFF050XEY	kidney	E2F_zfC2H2	kmer	0.492282	0.599728	0.107446
ENCFF910QEB	HepG2	GLI	kmer	0.43213	0.539546	0.107416
ENCFF185LPE	HL-60	CEBPB_HS_SELEX_M5314_1	pwm	0.68377	0.791142	0.107372
ENCFF661YBX	bronchial-epithelial-cell	P53_HS_SELEX_M6105_1	pwm	0.517816	0.625184	0.107368
ENCFF828VUZ	retina	TFAP2A_HS_SELEX_M5912_1	pwm	0.462618	0.569888	0.10727
ENCFF782LZX	L1-S8R	POU	kmer	0.49907	0.606318	0.107248
ENCFF665HCW	GM23248	RUNX3_HS_SELEX_M5792_1	pwm	0.468058	0.575292	0.107234
ENCFF911OBG	AG04450	FOX	kmer	0.505042	0.612214	0.107172
ENCFF153SDP	EL	RUNX3_HS_SELEX_M5792_1	pwm	0.49917	0.606212	0.107042
ENCFF134ZJK	right-lung	FOX	kmer	0.480764	0.587766	0.107002
ENCFF679MSO	retina	MEIS2_MM_PBM_M0965_1	pwm	0.502276	0.609238	0.106962
ENCFF767JPZ	HepG2	zfC4	kmer	0.441824	0.548756	0.106932
ENCFF541GPX	Caco-2	zfC2H2_RHD	kmer	0.52453	0.631448	0.106918
ENCFF413NVW	large-intestine	HNF4A_HS_SELEX_M5524_1	pwm	0.498704	0.605588	0.106884
ENCFF484TLE	transverse-colon	HNF4A_HS_SELEX_M5524_1	pwm	0.489832	0.596716	0.106884
ENCFF644XOI	fibroblast-of-lung	ZBTB18_HS_SELEX_M5968_1	pwm	0.474688	0.581556	0.106868
ENCFF745UXV	mesenchymal-stem-cell	FOXB1_HS_SELEX_M5438_1	pwm	0.489942	0.596788	0.106846
ENCFF403LQM	kidney	zfC2H2_RHD	kmer	0.53018	0.63702	0.10684
ENCFF663DTX	large-intestine	SNAI2_HS_SELEX_M5809_1	pwm	0.420202	0.527008	0.106806
ENCFF090WJW	cardiovascular-progenitor-cell	ZIC1_HS_SELEX_M5963_1	pwm	0.487	0.593792	0.106792
ENCFF221FPW	fibroblast-of-villous-mesenchyme	RUNX3_HS_SELEX_M5792_1	pwm	0.470316	0.577068	0.106752
ENCFF268UJI	smooth-muscle-cell-of-the-brain-vasculature	RUNX3_HS_SELEX_M5792_1	pwm	0.471026	0.577752	0.106726
ENCFF413SVK	AG09319	NEUROG2_HS_SELEX_M5653_1	pwm	0.495814	0.60252	0.106706
ENCFF541GPX	Caco-2	AP2	kmer	0.477156	0.583772	0.106616
ENCFF470VZX	A549	FOXB1_HS_SELEX_M5438_1	pwm	0.502084	0.608686	0.106602
ENCFF322ZNH	brain	NEUROG2_HS_SELEX_M5653_1	pwm	0.477556	0.584072	0.106516
ENCFF662JPI	astrocyte-of-the-hippocampus	TEAD1_HS_SELEX_M5904_1	pwm	0.553646	0.660146	0.1065
ENCFF499HUD	KBM-7	ELF1_HS_SELEX_M5373_1	pwm	0.659604	0.766088	0.106484
ENCFF911FIA	Karpas-422	SNAI2_HS_SELEX_M5809_1	pwm	0.436658	0.543132	0.106474
ENCFF470VZX	A549	FOX	kmer	0.496186	0.602652	0.106466
ENCFF751OEX	small-intestine	RXRG_MM_PBM_M1440_1	pwm	0.49005	0.596504	0.106454
ENCFF159HJV	B-cell	SFPI1_HS_SELEX_M5863_1	pwm	0.542188	0.648642	0.106454
ENCFF706BCL	body-of-pancreas	SNAI	kmer	0.470894	0.577346	0.106452
ENCFF567LLQ	left-kidney	PLAGL1	kmer	0.45229	0.558732	0.106442
ENCFF261BTV	muscle-of-back	NFIX_HS_SELEX_M5665_1	pwm	0.588456	0.694808	0.106352
ENCFF365IGK	common-myeloid-progenitor_-CD34-positive	ZNF354C_HS_SELEX_M1950_1	pwm	0.466888	0.57323	0.106342
ENCFF861DSY	tibial-artery	EBF1_HS_SELEX_M5364_1	pwm	0.455756	0.562096	0.10634
ENCFF941HUI	stomach	HIC2_HS_SELEX_M5512_1	pwm	0.444212	0.550468	0.106256
ENCFF899ISV	ELR	RUNX3_HS_SELEX_M5792_1	pwm	0.484674	0.590924	0.10625
ENCFF564SMU	small-intestine	zfC4	kmer	0.453756	0.559992	0.106236
ENCFF903ULR	hindlimb-muscle	NFAT	kmer	0.51557	0.6218	0.10623
ENCFF704WQC	myotube	ZBTB18_HS_SELEX_M5968_1	pwm	0.487488	0.593684	0.106196
ENCFF722CYJ	small-intestine	SNAI2_HS_SELEX_M5809_1	pwm	0.458166	0.56432	0.106154
ENCFF527EJQ	epithelial-cell-of-esophagus	SNAI2_HS_SELEX_M5809_1	pwm	0.477582	0.583716	0.106134
ENCFF326SSU	muscle-of-arm	NEUROG2_HS_SELEX_M5653_1	pwm	0.48122	0.587348	0.106128
ENCFF238YWY	epithelial-cell-of-prostate	P53_HS_SELEX_M6105_1	pwm	0.598208	0.704332	0.106124
ENCFF599BMR	small-intestine	FOXB1_HS_SELEX_M5438_1	pwm	0.48848	0.594526	0.106046
ENCFF552CWN	bronchial-epithelial-cell	JUND_HS_SELEX_M0320_1	pwm	0.603038	0.70904	0.106002
ENCFF506YRM	NT2_D1	ZIC1_HS_SELEX_M5963_1	pwm	0.481514	0.587514	0.106
ENCFF941HUI	stomach	FOXR	kmer	0.49323	0.599184	0.105954
ENCFF261BTV	muscle-of-back	NFAT	kmer	0.514122	0.620066	0.105944
ENCFF413SVK	AG09319	OLIG1_HS_SELEX_M5690_1	pwm	0.49377	0.599648	0.105878
ENCFF012QDX	T-helper-1-cell	TBX5_MM_PBM_M1627_1	pwm	0.48582	0.591686	0.105866
ENCFF623AFX	K562	EGR	kmer	0.503004	0.608854	0.10585
ENCFF789TOW	spinal-cord	NFIA_HS_SELEX_M5661_1	pwm	0.514454	0.620286	0.105832
ENCFF420UQF	T-helper-2-cell	IRF	kmer	0.45433	0.560128	0.105798
ENCFF230SPN	neural-progenitor-cell	PLAGL1	kmer	0.476764	0.582544	0.10578
ENCFF664DCZ	cardiac-muscle-cell	GATA	kmer	0.498436	0.604202	0.105766
ENCFF587YNA	spleen	FLI1_HS_SELEX_M5431_1	pwm	0.612678	0.718438	0.10576
ENCFF506YRM	NT2_D1	AP2	kmer	0.463572	0.569246	0.105674
ENCFF562NMD	muscle-of-trunk	NFIX_HS_SELEX_M5665_1	pwm	0.595338	0.701008	0.10567
ENCFF535KCZ	renal-pelvis	zfC2H2_RHD	kmer	0.519704	0.625344	0.10564
ENCFF063IUG	CD14-positive-monocyte	ETSIII	kmer	0.582602	0.688176	0.105574
ENCFF330HEK	endothelial-cell-of-umbilical-vein	FLI1_HS_SELEX_M5431_1	pwm	0.683712	0.789264	0.105552
ENCFF986DGM	hematopoietic-multipotent-progenitor-cell	GATA	kmer	0.493638	0.599188	0.10555
ENCFF810HAS	GM23338	GLI	kmer	0.41776	0.523282	0.105522
ENCFF456VYF	mesendoderm	ZIC1_HS_SELEX_M5963_1	pwm	0.474096	0.579538	0.105442
ENCFF601PAY	thymus	ZBTB18_HS_SELEX_M5968_1	pwm	0.47564	0.581008	0.105368
ENCFF687FIQ	heart-right-ventricle	FOXB1_HS_SELEX_M5438_1	pwm	0.486602	0.591952	0.10535
ENCFF701IYS	stomach	FOXA2_MM_PBM_M0729_1	pwm	0.542602	0.647946	0.105344
ENCFF104JWY	right-lung	OLIG1_HS_SELEX_M5690_1	pwm	0.487468	0.592774	0.105306
ENCFF920DDN	large-intestine	SNAI2_HS_SELEX_M5809_1	pwm	0.450962	0.556256	0.105294
ENCFF460ZFL	lung-microvascular-endothelial-cell	FOX	kmer	0.53099	0.636276	0.105286
ENCFF807SXP	H1	GLI	kmer	0.423392	0.528656	0.105264
ENCFF743UIM	common-myeloid-progenitor_-CD34-positive	ZBTB18_HS_SELEX_M5968_1	pwm	0.47644	0.5817	0.10526
ENCFF358VDV	heart	MEF2A_HS_SELEX_M5615_1	pwm	0.489792	0.59504	0.105248
ENCFF541GPX	Caco-2	ZNF202_MM_PBM_M0404_1	pwm	0.525822	0.631054	0.105232
11	iPS-DF-19	GLI	kmer	0.426944	0.532166	0.105222
ENCFF743UIM	common-myeloid-progenitor_-CD34-positive	GATA	kmer	0.51387	0.619076	0.105206
ENCFF523TKA	muscle-of-arm	NFIX_HS_SELEX_M5665_1	pwm	0.589004	0.694152	0.105148
ENCFF358VDV	heart	TALE_zfC2H2	kmer	0.566842	0.671986	0.105144
ENCFF959FMP	thymus	TCF7_HS_SELEX_M6099_1	pwm	0.487676	0.592736	0.10506
ENCFF422GYH	heart	NFIX_HS_SELEX_M5665_1	pwm	0.566378	0.671426	0.105048
ENCFF199RXV	stomach	SNAI2_HS_SELEX_M5809_1	pwm	0.39055	0.49553	0.10498
ENCFF520HKD	heart-left-ventricle	GATA	kmer	0.497902	0.602858	0.104956
ENCFF142WAA	transverse-colon	GLI	kmer	0.45383	0.55868	0.10485
ENCFF223UWR	skeletal-muscle-myoblast	MYF6_MM_PBM_M0210_1	pwm	0.574426	0.679258	0.104832
ENCFF196VQQ	large-intestine	GATA	kmer	0.485896	0.590724	0.104828
ENCFF366UHV	dermis-microvascular-lymphatic-vessel-endothelial-cell	NEUROG2_HS_SELEX_M5653_1	pwm	0.478612	0.58328	0.104668
ENCFF308QOO	AG04449	TEAD1_HS_SELEX_M5904_1	pwm	0.584172	0.688796	0.104624
ENCFF836DBU	cardiovascular-progenitor-cell	FOX	kmer	0.479156	0.583766	0.10461
ENCFF272AFT	fibroblast-of-the-conjunctiva	NEUROG2_HS_SELEX_M5653_1	pwm	0.488268	0.59287	0.104602
ENCFF588SBI	muscle-of-arm	NFIX_HS_SELEX_M5665_1	pwm	0.580752	0.685326	0.104574
ENCFF528GDM	brain	MEIS2_MM_PBM_M0965_1	pwm	0.540822	0.64536	0.104538
ENCFF055ZSF	Peyers-patch	HIC2_HS_SELEX_M5512_1	pwm	0.452506	0.557008	0.104502
ENCFF794AMB	left-lung	OLIG1_HS_SELEX_M5690_1	pwm	0.483626	0.58812	0.104494
ENCFF903ULR	hindlimb-muscle	ZBTB18_HS_SELEX_M5968_1	pwm	0.483884	0.588376	0.104492
ENCFF161NFM	transverse-colon	GLI	kmer	0.432726	0.537138	0.104412
ENCFF925ZDU	NB4	GLI	kmer	0.416484	0.520884	0.1044
ENCFF304GVP	Jurkat-clone-E61	ELF1_HS_SELEX_M5373_1	pwm	0.55267	0.65706	0.10439
ENCFF474QAJ	fibroblast-of-skin-of-left-quadriceps	ZBTB18_HS_SELEX_M5968_1	pwm	0.470952	0.575278	0.104326
ENCFF012QTD	testis	NFIX_HS_SELEX_M5665_1	pwm	0.558562	0.662828	0.104266
ENCFF437IAA	CMK	FLI1_HS_SELEX_M5431_1	pwm	0.606786	0.711026	0.10424
ENCFF233TRB	left-lung	NEUROG2_HS_SELEX_M5653_1	pwm	0.512472	0.616664	0.104192
ENCFF053SED	heart	HIC2_HS_SELEX_M5512_1	pwm	0.45891	0.563076	0.104166
ENCFF036PGY	right-lung	OLIG1_HS_SELEX_M5690_1	pwm	0.477666	0.58182	0.104154
ENCFF599BMR	small-intestine	RXRG_MM_PBM_M1440_1	pwm	0.482008	0.58615	0.104142
ENCFF782LZX	L1-S8R	SOX	kmer	0.526602	0.630716	0.104114
ENCFF086KUU	heart	TALE_zfC2H2	kmer	0.55534	0.659424	0.104084
ENCFF110CYC	common-myeloid-progenitor_-CD34-positive	NEUROG2_HS_SELEX_M5653_1	pwm	0.51709	0.621126	0.104036
ENCFF012QDX	T-helper-1-cell	ETS	kmer	0.636488	0.740508	0.10402
ENCFF338NUC	muscle-of-arm	ZBTB18_HS_SELEX_M5968_1	pwm	0.490992	0.595008	0.104016
ENCFF097IKA	GM12864	ZNF354C_HS_SELEX_M1950_1	pwm	0.449584	0.553542	0.103958
ENCFF611CTG	muscle-of-arm	NFATC2_HS_PBM_M1518_1	pwm	0.54599	0.649944	0.103954
ENCFF713OZX	L1-S8R	SOX	kmer	0.518586	0.62249	0.103904
ENCFF391OGO	prostate-gland	GRHL1_HS_SELEX_M5498_1	pwm	0.496094	0.599988	0.103894
ENCFF718CUQ	renal-cortex-interstitium	zfC2H2_RHD	kmer	0.524186	0.628052	0.103866
ENCFF854EJY	common-myeloid-progenitor_-CD34-positive	ELF1_HS_SELEX_M5373_1	pwm	0.59772	0.701572	0.103852
ENCFF579QTP	muscle-of-leg	NFAT	kmer	0.517722	0.62149	0.103768
ENCFF552CWN	bronchial-epithelial-cell	SNAI2_HS_SELEX_M5809_1	pwm	0.48247	0.586206	0.103736
ENCFF767JPZ	HepG2	GLI	kmer	0.450242	0.553964	0.103722
ENCFF090WJW	cardiovascular-progenitor-cell	TEA	kmer	0.504516	0.608214	0.103698
ENCFF250FRA	heart-right-ventricle	TALE_zfC2H2	kmer	0.515754	0.619424	0.10367
7	iPS-DF-19	SOX4_HS_PBM_M1578_1	pwm	0.513578	0.617246	0.103668
ENCFF732XMH	Peyers-patch	SNAI2_HS_SELEX_M5809_1	pwm	0.455334	0.558984	0.10365
ENCFF284MUO	muscle-of-back	NFIX_HS_SELEX_M5665_1	pwm	0.582584	0.686214	0.10363
ENCFF063IUG	CD14-positive-monocyte	RUNX3_HS_SELEX_M5792_1	pwm	0.474994	0.578566	0.103572
ENCFF424GPY	CD14-positive-monocyte	SFPI1_HS_SELEX_M5863_1	pwm	0.561948	0.66552	0.103572
ENCFF061UBG	thymus	ZNF354C_HS_SELEX_M1950_1	pwm	0.46712	0.57066	0.10354
ENCFF134ZJK	right-lung	OLIG1_HS_SELEX_M5690_1	pwm	0.492674	0.59619	0.103516
ENCFF272LQP	iris-pigment-epithelial-cell	RUNX3_HS_SELEX_M5792_1	pwm	0.533754	0.63723	0.103476
ENCFF805JKJ	large-intestine	HNF4	kmer	0.529144	0.63258	0.103436
ENCFF523ZGF	large-intestine	GLI	kmer	0.420616	0.524036	0.10342
ENCFF984RKH	thymus	PLAGL1	kmer	0.465162	0.568562	0.1034
ENCFF687FIQ	heart-right-ventricle	GATA	kmer	0.506412	0.60981	0.103398
ENCFF097IKA	GM12864	IRF4-6	kmer	0.508166	0.611454	0.103288
ENCFF925ZDU	NB4	CEBPB_HS_SELEX_M5314_1	pwm	0.580528	0.683778	0.10325
ENCFF711VFJ	muscle-of-arm	OLIG1_HS_SELEX_M5690_1	pwm	0.489138	0.592356	0.103218
ENCFF711IJR	thymus	FLI1_HS_SELEX_M5431_1	pwm	0.584528	0.687734	0.103206
ENCFF830NSD	heart	NFIX_HS_SELEX_M5665_1	pwm	0.58745	0.69062	0.10317
ENCFF479KXR	foreskin-fibroblast	ZBTB18_HS_SELEX_M5968_1	pwm	0.498148	0.601318	0.10317
ENCFF713OZX	L1-S8R	POU3F4_HS_SELEX_M5739_1	pwm	0.48787	0.591	0.10313
ENCFF321LTV	small-intestine	TBX5_MM_PBM_M1627_1	pwm	0.45145	0.554524	0.103074
ENCFF495SEM	hematopoietic-multipotent-progenitor-cell	SFPI1_HS_SELEX_M5863_1	pwm	0.522288	0.625348	0.10306
ENCFF369ALL	WI38	FOXB1_HS_SELEX_M5438_1	pwm	0.516492	0.619538	0.103046
ENCFF259KDP	tongue	NFIX_HS_SELEX_M5665_1	pwm	0.548156	0.65117	0.103014
ENCFF193PBQ	heart	MAFB_MM_PBM_M0321_1	pwm	0.545908	0.648906	0.102998
ENCFF304GVP	Jurkat-clone-E61	SNAI2_HS_SELEX_M5809_1	pwm	0.502836	0.605802	0.102966
ENCFF221FND	Daoy	NR2E	kmer	0.523178	0.626138	0.10296
ENCFF984RUT	eye	Hbox-III	kmer	0.509108	0.612062	0.102954
ENCFF452EGS	LNCaP-clone-FGC	NFIX_HS_SELEX_M5665_1	pwm	0.633524	0.736444	0.10292
ENCFF024DAR	common-myeloid-progenitor_-CD34-positive	GATA	kmer	0.50866	0.611512	0.102852
ENCFF409QXF	heart-left-ventricle	GATA6_MM_PBM_M0782_1	pwm	0.571934	0.674754	0.10282
ENCFF984RKH	thymus	Tbox	kmer	0.448992	0.551802	0.10281
ENCFF874KUM	heart	MEF2B_HS_SELEX_M5616_1	pwm	0.525296	0.6281	0.102804
ENCFF564SMU	small-intestine	THRA_HS_HOKOMOKO_M6521_1	pwm	0.457022	0.559812	0.10279
ENCFF911OBG	AG04450	ZBTB18_HS_SELEX_M5968_1	pwm	0.481174	0.583956	0.102782
ENCFF336MQK	fibroblast-of-skin-of-left-biceps	RUNX3_HS_SELEX_M5792_1	pwm	0.528008	0.630678	0.10267
ENCFF602XCK	naive-thymus-derived-CD4-positive_-alpha-beta-T-cell	TCF7_HS_SELEX_M6099_1	pwm	0.488288	0.59093	0.102642
ENCFF523ZGF	large-intestine	HNF4	kmer	0.481044	0.58368	0.102636
ENCFF494EIC	large-intestine	HNF4	kmer	0.515896	0.618528	0.102632
ENCFF260PQV	OCI-LY7	TBX5_MM_PBM_M1627_1	pwm	0.445466	0.548076	0.10261
ENCFF215RET	kidney	GLI	kmer	0.467246	0.569784	0.102538
ENCFF818WPF	lung	OLIG1_HS_SELEX_M5690_1	pwm	0.49008	0.592586	0.102506
ENCFF665WNI	thyroid-gland	SNAI2_HS_SELEX_M5809_1	pwm	0.43996	0.542458	0.102498
ENCFF910QEB	HepG2	TCF7_HS_SELEX_M6099_1	pwm	0.474228	0.576724	0.102496
ENCFF920DDN	large-intestine	TBX5_MM_PBM_M1627_1	pwm	0.464084	0.566522	0.102438
ENCFF469AJE	fibroblast-of-skin-of-upper-back	TEAD1_HS_SELEX_M5904_1	pwm	0.56872	0.671158	0.102438
ENCFF045UNP	dermis-blood-vessel-endothelial-cell	FOX	kmer	0.490596	0.593028	0.102432
ENCFF805BEX	heart	MEF2A_HS_SELEX_M5615_1	pwm	0.49582	0.598222	0.102402
ENCFF788MXD	smooth-muscle-cell-of-the-brain-vasculature	FOX	kmer	0.503188	0.605558	0.10237
ENCFF692AJW	small-intestine	GLI	kmer	0.42483	0.52719	0.10236
ENCFF710SFP	NAMALWA	EBF1_HS_SELEX_M5364_1	pwm	0.460136	0.56249	0.102354
ENCFF352HSZ	adrenal-gland	ESRR-II	kmer	0.495448	0.5978	0.102352
ENCFF259KDP	tongue	OLIG1_HS_SELEX_M5690_1	pwm	0.481008	0.583346	0.102338
ENCFF564SMU	small-intestine	SNAI2_HS_SELEX_M5809_1	pwm	0.40695	0.509266	0.102316
ENCFF917YWY	small-intestine	SNAI2_HS_SELEX_M5809_1	pwm	0.440198	0.542496	0.102298
ENCFF512IPA	choroid-plexus-epithelial-cell	AR_MM_PBM_M1456_1	pwm	0.468064	0.570358	0.102294
ENCFF289XNF	left-lung	NEUROG2_HS_SELEX_M5653_1	pwm	0.489208	0.591466	0.102258
ENCFF679MSO	retina	SOX4_HS_PBM_M1578_1	pwm	0.476854	0.579104	0.10225
ENCFF307VFD	muscle-of-arm	OLIG1_HS_SELEX_M5690_1	pwm	0.478292	0.580536	0.102244
ENCFF059VUS	common-myeloid-progenitor_-CD34-positive	ZBTB18_HS_SELEX_M5968_1	pwm	0.49675	0.598988	0.102238
ENCFF110CYC	common-myeloid-progenitor_-CD34-positive	MYF6_MM_PBM_M0210_1	pwm	0.517762	0.619968	0.102206
ENCFF321LTV	small-intestine	TCF7_HS_SELEX_M6099_1	pwm	0.49712	0.59932	0.1022
7	iPS-DF-4	TEAD1_HS_SELEX_M5904_1	pwm	0.51195	0.614094	0.102144
ENCFF870MCD	H7	PLAGL1	kmer	0.489628	0.59175	0.102122
ENCFF481KKG	T-helper-2-cell	TBX5_MM_PBM_M1627_1	pwm	0.464072	0.566128	0.102056
ENCFF659BCP	muscle-of-leg	OLIG1_HS_SELEX_M5690_1	pwm	0.474832	0.576876	0.102044
11	iPS-DF-19	POU	kmer	0.515276	0.617298	0.102022
ENCFF719FAT	foreskin-keratinocyte	P53_HS_SELEX_M6105_1	pwm	0.558854	0.660872	0.102018
ENCFF308QOO	AG04449	TEA	kmer	0.567202	0.669214	0.102012
ENCFF012QDX	T-helper-1-cell	GLI2_HS_SELEX_M5489_1	pwm	0.4868	0.588806	0.102006
ENCFF862ZMZ	cardiac-muscle-cell	TEAD1_HS_SELEX_M5904_1	pwm	0.508816	0.610812	0.101996
ENCFF261BTV	muscle-of-back	NEUROG2_HS_SELEX_M5653_1	pwm	0.48114	0.583134	0.101994
ENCFF267VKD	CD1c-positive-myeloid-dendritic-cell	FLI1_HS_SELEX_M5431_1	pwm	0.59836	0.70035	0.10199
ENCFF286LYP	liver	GATA	kmer	0.504882	0.606864	0.101982
ENCFF413NVW	large-intestine	TCF7_HS_SELEX_M6099_1	pwm	0.475792	0.57772	0.101928
ENCFF099MBG	muscle-of-arm	NEUROG2_HS_SELEX_M5653_1	pwm	0.480628	0.58252	0.101892
ENCFF260PQV	OCI-LY7	ETSIII	kmer	0.513006	0.614894	0.101888
ENCFF850STV	forelimb-muscle	OLIG1_HS_SELEX_M5690_1	pwm	0.490758	0.592628	0.10187
ENCFF870MCD	H7	GLI	kmer	0.43784	0.539672	0.101832
ENCFF972QQK	brain-pericyte	zfC4	kmer	0.454184	0.556014	0.10183
ENCFF972QQK	brain-pericyte	ZBTB18_HS_SELEX_M5968_1	pwm	0.477824	0.579632	0.101808
ENCFF250FRA	heart-right-ventricle	MEIS2_MM_PBM_M0965_1	pwm	0.53167	0.633476	0.101806
ENCFF061UBG	thymus	Tbox	kmer	0.468296	0.570088	0.101792
ENCFF871GML	heart	MEF2A_HS_SELEX_M5615_1	pwm	0.497476	0.599248	0.101772
ENCFF587YNA	spleen	ELF1_HS_SELEX_M5373_1	pwm	0.575362	0.6771	0.101738
ENCFF042ALK	fibroblast-of-mammary-gland	NEUROG2_HS_SELEX_M5653_1	pwm	0.510872	0.61261	0.101738
ENCFF751OEX	small-intestine	SNAI2_HS_SELEX_M5809_1	pwm	0.442156	0.54389	0.101734
ENCFF780DOD	dermis-blood-vessel-endothelial-cell	ETS	kmer	0.688384	0.790114	0.10173
ENCFF601PAY	thymus	ZIC1_HS_SELEX_M5963_1	pwm	0.4647	0.566396	0.101696
ENCFF286LYP	liver	zfCXXC_SAND	kmer	0.440956	0.54262	0.101664
ENCFF915CHV	retinal-pigment-epithelial-cell	PITX	kmer	0.600802	0.702456	0.101654
ENCFF165ZIA	lung-microvascular-endothelial-cell	NFATC2_HS_PBM_M1518_1	pwm	0.569056	0.670672	0.101616
ENCFF732XMH	Peyers-patch	HNF4	kmer	0.496436	0.59802	0.101584
ENCFF674LBB	astrocyte-of-the-spinal-cord	JUND_HS_SELEX_M0320_1	pwm	0.609106	0.71069	0.101584
ENCFF050XEY	kidney	zfCXXC_SAND	kmer	0.44469	0.54627	0.10158
ENCFF961JXL	thymus	ZNF354C_HS_SELEX_M1950_1	pwm	0.437374	0.538916	0.101542
ENCFF986DGM	hematopoietic-multipotent-progenitor-cell	ETSIII	kmer	0.541056	0.64258	0.101524
ENCFF701IYS	stomach	GRHL1_HS_SELEX_M5498_1	pwm	0.538402	0.639858	0.101456
ENCFF880KWE	thymus	ZIC1_HS_SELEX_M5963_1	pwm	0.476036	0.577488	0.101452
ENCFF926OPP	CD8-positive_-alpha-beta-T-cell	FLI1_HS_SELEX_M5431_1	pwm	0.597172	0.698566	0.101394
ENCFF344IND	right-lung	NEUROG2_HS_SELEX_M5653_1	pwm	0.497112	0.598456	0.101344
ENCFF165ZIA	lung-microvascular-endothelial-cell	FOX	kmer	0.508524	0.609866	0.101342
ENCFF507FBF	AG09319	RUNX3_HS_SELEX_M5792_1	pwm	0.490422	0.59172	0.101298
ENCFF855CMV	trophoblast-cell	ESR2_HS_HOCOMOCO_M6219_1	pwm	0.474256	0.575522	0.101266
ENCFF287SCA	GM04504	TEAD1_HS_SELEX_M5904_1	pwm	0.509816	0.611044	0.101228
ENCFF502POZ	placenta	GRHL1_HS_SELEX_M5498_1	pwm	0.53761	0.638752	0.101142
ENCFF059VUS	common-myeloid-progenitor_-CD34-positive	GATA	kmer	0.514312	0.615418	0.101106
ENCFF020LII	muscle-of-leg	NEUROG2_HS_SELEX_M5653_1	pwm	0.48004	0.581128	0.101088
ENCFF888JLF	SK-N-MC	TFAP2A_HS_SELEX_M5912_1	pwm	0.52681	0.627862	0.101052
ENCFF086KUU	heart	HIC1	kmer	0.463256	0.564252	0.100996
ENCFF828VUZ	retina	zfCXXC_SAND	kmer	0.47608	0.577064	0.100984
ENCFF996VLV	muscle-of-arm	NFIX_HS_SELEX_M5665_1	pwm	0.600342	0.701322	0.10098
ENCFF063MTX	fibroblast-of-gingiva	CEBPB_HS_SELEX_M5314_1	pwm	0.598636	0.69961	0.100974
ENCFF744IAP	kidney	EGR	kmer	0.453618	0.55456	0.100942
ENCFF199RXV	stomach	FOX	kmer	0.496148	0.597022	0.100874
ENCFF797QID	muscle-of-back	OLIG1_HS_SELEX_M5690_1	pwm	0.487058	0.587928	0.10087
ENCFF358VDV	heart	MEF2B_HS_SELEX_M5616_1	pwm	0.49404	0.594766	0.100726
ENCFF870MCD	H7	SOX4_HS_PBM_M1578_1	pwm	0.503558	0.604238	0.10068
ENCFF362PAJ	WERI-Rb-1	OTX1_HS_SELEX_M5699_1	pwm	0.72886	0.829484	0.100624
ENCFF854EJY	common-myeloid-progenitor_-CD34-positive	ETS	kmer	0.660486	0.761074	0.100588
ENCFF399UZY	astrocyte	RUNX3_HS_SELEX_M5792_1	pwm	0.619692	0.72023	0.100538
ENCFF165ZIA	lung-microvascular-endothelial-cell	SOX4_HS_PBM_M1578_1	pwm	0.482422	0.582892	0.10047
ENCFF674LBB	astrocyte-of-the-spinal-cord	bZIP	kmer	0.557166	0.657588	0.100422
ENCFF330HEK	endothelial-cell-of-umbilical-vein	ETS	kmer	0.654546	0.754884	0.100338
ENCFF032LRL	foreskin-fibroblast	ZBTB18_HS_SELEX_M5968_1	pwm	0.499392	0.599724	0.100332
ENCFF272AFT	fibroblast-of-the-conjunctiva	NFIX_HS_SELEX_M5665_1	pwm	0.54403	0.64436	0.10033
ENCFF953MDZ	HAP-1	SOX4_HS_PBM_M1578_1	pwm	0.55344	0.653738	0.100298
ENCFF445GCV	fibroblast-of-dermis	NEUROG2_HS_SELEX_M5653_1	pwm	0.55936	0.659642	0.100282
ENCFF358VDV	heart	MEIS2_MM_PBM_M0965_1	pwm	0.58669	0.686966	0.100276
ENCFF094AUJ	adrenal-gland	zfC4	kmer	0.472262	0.572504	0.100242
ENCFF664QUB	right-lung	NFIX_HS_SELEX_M5665_1	pwm	0.582842	0.683036	0.100194
ENCFF959FMP	thymus	TCF7	kmer	0.492744	0.592914	0.10017
ENCFF706BCL	body-of-pancreas	ZBTB18_HS_SELEX_M5968_1	pwm	0.479316	0.579486	0.10017
ENCFF941HUI	stomach	NFIX_HS_SELEX_M5665_1	pwm	0.569576	0.669722	0.100146
ENCFF562ESR	transverse-colon	HNF4A_HS_SELEX_M5524_1	pwm	0.494008	0.594136	0.100128
ENCFF199RXV	stomach	FOXA2_MM_PBM_M0729_1	pwm	0.511758	0.611812	0.100054
ENCFF268UJI	smooth-muscle-cell-of-the-brain-vasculature	ZBTB18_HS_SELEX_M5968_1	pwm	0.476336	0.576374	0.100038
ENCFF823QRP	dermis-blood-vessel-endothelial-cell	FOX	kmer	0.492574	0.592536	0.099962
ENCFF719FXT	choroid-plexus-epithelial-cell	FOX	kmer	0.481454	0.581412	0.099958
ENCFF679MSO	retina	TALE_zfC2H2	kmer	0.500516	0.60047	0.099954
ENCFF768WKW	SK-N-DZ	NEUROG2_HS_SELEX_M5653_1	pwm	0.50973	0.60968	0.09995
ENCFF336MQK	fibroblast-of-skin-of-left-biceps	ZBTB18_HS_SELEX_M5968_1	pwm	0.473918	0.573784	0.099866
ENCFF402DMO	retina	VENTXselex_HS_SELEX_M5947_1	pwm	0.511264	0.611086	0.099822
ENCFF308QOO	AG04449	RUNX3_HS_SELEX_M5792_1	pwm	0.528736	0.628526	0.09979
ENCFF414BFO	muscle-of-back	NFIX_HS_SELEX_M5665_1	pwm	0.592998	0.692758	0.09976
ENCFF837KHA	muscle-of-arm	NFAT	kmer	0.523216	0.622936	0.09972
ENCFF004PBJ	GM12865	IRF4-6	kmer	0.516262	0.615888	0.099626
ENCFF289XSM	CD14-positive-monocyte	ETS	kmer	0.629216	0.728776	0.09956
ENCFF672BMB	mammary-epithelial-cell	SNAI2_HS_SELEX_M5809_1	pwm	0.438342	0.537884	0.099542
ENCFF559HGO	small-intestine	TBX5_MM_PBM_M1627_1	pwm	0.464966	0.56449	0.099524
ENCFF929VDK	common-myeloid-progenitor_-CD34-positive	ELF1_HS_SELEX_M5373_1	pwm	0.629536	0.729048	0.099512
ENCFF837VPM	fibroblast-of-skin-of-left-biceps	ZBTB18_HS_SELEX_M5968_1	pwm	0.462848	0.56235	0.099502
ENCFF823QRP	dermis-blood-vessel-endothelial-cell	NFAT	kmer	0.518054	0.61754	0.099486
ENCFF914GVC	omental-fat-pad	zfCXXC_SAND	kmer	0.453544	0.553022	0.099478
ENCFF084LGH	dermis-blood-vessel-endothelial-cell	FOX	kmer	0.50011	0.599466	0.099356
ENCFF959RZS	GM23248	bZIP	kmer	0.588178	0.687506	0.099328
ENCFF452EGS	LNCaP-clone-FGC	HIC2_HS_SELEX_M5512_1	pwm	0.518076	0.61735	0.099274
ENCFF836DBU	cardiovascular-progenitor-cell	ZIC	kmer	0.48099	0.580232	0.099242
11	iPS-DF-19	TEA	kmer	0.487458	0.586676	0.099218
ENCFF276FKY	large-intestine	TBX5_MM_PBM_M1627_1	pwm	0.455494	0.554702	0.099208
ENCFF715BDS	muscle-of-arm	NFIX_HS_SELEX_M5665_1	pwm	0.561984	0.661166	0.099182
7	iPS-DF-19	SOXC	kmer	0.49924	0.59839	0.09915
ENCFF189LKP	thymus	FLI1_HS_SELEX_M5431_1	pwm	0.61468	0.713794	0.099114
ENCFF382GKE	MCF-7	TBX5_MM_PBM_M1627_1	pwm	0.4472	0.546264	0.099064
ENCFF062LRW	AG10803	RUNX3_HS_SELEX_M5792_1	pwm	0.527004	0.626064	0.09906
ENCFF993TCA	glomerular-endothelial-cell	ELF1_HS_SELEX_M5373_1	pwm	0.636092	0.735146	0.099054
ENCFF807SXP	H1	PLAGL1	kmer	0.462156	0.561186	0.09903
ENCFF564VUG	placenta	GRHL1_HS_SELEX_M5498_1	pwm	0.52824	0.627256	0.099016
ENCFF623AFX	K562	ZIC1_HS_SELEX_M5963_1	pwm	0.483772	0.582772	0.099
ENCFF228YKV	HCT116	NR2E	kmer	0.550824	0.64982	0.098996
ENCFF419NYS	dermis-blood-vessel-endothelial-cell	FOX	kmer	0.508896	0.607856	0.09896
ENCFF241GBQ	hematopoietic-multipotent-progenitor-cell	GATA	kmer	0.4945	0.593418	0.098918
ENCFF457XYZ	brain	MEIS2_MM_PBM_M0965_1	pwm	0.518668	0.617582	0.098914
ENCFF623AFX	K562	AP2	kmer	0.474912	0.573788	0.098876
ENCFF947RDC	thymus	FLI1_HS_SELEX_M5431_1	pwm	0.578838	0.67771	0.098872
ENCFF166VSZ	placenta	EBF1_HS_SELEX_M5364_1	pwm	0.459906	0.558776	0.09887
ENCFF833JBU	heart	MEIS2_MM_PBM_M0965_1	pwm	0.542016	0.640886	0.09887
ENCFF961JXL	thymus	ZIC1_HS_SELEX_M5963_1	pwm	0.464176	0.562994	0.098818
ENCFF288VDM	kidney	EGR	kmer	0.496044	0.594826	0.098782
ENCFF663DTX	large-intestine	RXRG_MM_PBM_M1440_1	pwm	0.471924	0.570706	0.098782
ENCFF805BEX	heart	MEF2B_HS_SELEX_M5616_1	pwm	0.49608	0.59485	0.09877
ENCFF952FSO	AG09309	RUNX3_HS_SELEX_M5792_1	pwm	0.53069	0.629436	0.098746
ENCFF984RKH	thymus	ZIC1_HS_SELEX_M5963_1	pwm	0.466284	0.565016	0.098732
ENCFF666SXY	thyroid-gland	HIC1	kmer	0.508518	0.6072	0.098682
ENCFF195KNE	T-helper-1-cell	ZNF354C_HS_SELEX_M1950_1	pwm	0.462806	0.561454	0.098648
ENCFF782LZX	L1-S8R	ZIC1_HS_SELEX_M5963_1	pwm	0.46568	0.564324	0.098644
ENCFF687UQV	neural-stem-progenitor-cell	SOX	kmer	0.495858	0.5945	0.098642
ENCFF162HDT	spinal-cord	NFIX_HS_SELEX_M5665_1	pwm	0.561816	0.660452	0.098636
ENCFF110CYC	common-myeloid-progenitor_-CD34-positive	ETSIII	kmer	0.537114	0.635724	0.09861
ENCFF097RTD	cardiac-muscle-cell	GATA	kmer	0.511812	0.610414	0.098602
ENCFF248RWN	retinal-pigment-epithelial-cell	OTX1_HS_SELEX_M5699_1	pwm	0.62207	0.720666	0.098596
11	iPS-DF-19	ZIC1_HS_SELEX_M5963_1	pwm	0.480942	0.579536	0.098594
ENCFF357EZI	lung	FOX	kmer	0.486908	0.585454	0.098546
ENCFF961JXL	thymus	ZBTB18_HS_SELEX_M5968_1	pwm	0.47832	0.576814	0.098494
ENCFF712AKP	lung	OLIG1_HS_SELEX_M5690_1	pwm	0.49174	0.590168	0.098428
ENCFF110CYC	common-myeloid-progenitor_-CD34-positive	ZNF354C_HS_SELEX_M1950_1	pwm	0.467686	0.566014	0.098328
ENCFF109VIJ	CD8-positive_-alpha-beta-T-cell	TBX5_MM_PBM_M1627_1	pwm	0.443042	0.541346	0.098304
ENCFF159HJV	B-cell	FLI1_HS_SELEX_M5431_1	pwm	0.592642	0.690944	0.098302
ENCFF530CGM	brain	MEIS2_MM_PBM_M0965_1	pwm	0.532376	0.630662	0.098286
ENCFF837KHA	muscle-of-arm	NFIX_HS_SELEX_M5665_1	pwm	0.56135	0.65963	0.09828
ENCFF562ESR	transverse-colon	ZFP959	kmer	0.471486	0.569742	0.098256
ENCFF623AFX	K562	TFAP2A_HS_SELEX_M5912_1	pwm	0.480598	0.57885	0.098252
ENCFF712AKP	lung	NFIA_HS_SELEX_M5661_1	pwm	0.516674	0.614922	0.098248
ENCFF722CYJ	small-intestine	TBX5_MM_PBM_M1627_1	pwm	0.438932	0.537164	0.098232
ENCFF355JBS	muscle-of-back	NFAT	kmer	0.531218	0.629414	0.098196
ENCFF073TCP	endodermal-cell	GLI	kmer	0.454526	0.552682	0.098156
ENCFF172LKJ	muscle-of-arm	NFAT	kmer	0.5364	0.63452	0.09812
ENCFF284QST	muscle-of-back	NFAT	kmer	0.52858	0.626678	0.098098
ENCFF954RNY	BE2C	TFAP2A_HS_SELEX_M5912_1	pwm	0.482388	0.580478	0.09809
ENCFF248RWN	retinal-pigment-epithelial-cell	PITX	kmer	0.59659	0.69457	0.09798
ENCFF084LGH	dermis-blood-vessel-endothelial-cell	TEAD1_HS_SELEX_M5904_1	pwm	0.505998	0.603972	0.097974
ENCFF153SDP	EL	TEA	kmer	0.55416	0.652122	0.097962
ENCFF941FIK	small-intestine	SNAI2_HS_SELEX_M5809_1	pwm	0.455022	0.552978	0.097956
ENCFF063IUG	CD14-positive-monocyte	SFPI1_HS_SELEX_M5863_1	pwm	0.551016	0.648966	0.09795
ENCFF221FPW	fibroblast-of-villous-mesenchyme	TEAD1_HS_SELEX_M5904_1	pwm	0.516092	0.614042	0.09795
ENCFF751OEX	small-intestine	HNF4	kmer	0.524248	0.622074	0.097826
ENCFF023ZMS	CD4-positive_-alpha-beta-T-cell	ZNF354C_HS_SELEX_M1950_1	pwm	0.444452	0.542272	0.09782
ENCFF483RJF	T-helper-17-cell	ETS	kmer	0.652048	0.749828	0.09778
ENCFF452EGS	LNCaP-clone-FGC	GRHL1_HS_SELEX_M5498_1	pwm	0.53658	0.634358	0.097778
ENCFF735APJ	lung	NFIX_HS_SELEX_M5665_1	pwm	0.58771	0.685456	0.097746
ENCFF984RUT	eye	TALE_zfC2H2	kmer	0.515586	0.613328	0.097742
ENCFF417VBX	fibroblast-of-pulmonary-artery	TEAD1_HS_SELEX_M5904_1	pwm	0.495264	0.593006	0.097742
ENCFF929UQL	Caco-2	EGR	kmer	0.485546	0.583244	0.097698
ENCFF097LEF	GM12878	ZNF354C_HS_SELEX_M1950_1	pwm	0.434106	0.53178	0.097674
ENCFF663INK	CD8-positive_-alpha-beta-T-cell	ETS	kmer	0.604374	0.702038	0.097664
ENCFF805BEX	heart	HIC2_HS_SELEX_M5512_1	pwm	0.454456	0.552074	0.097618
ENCFF512IML	CD8-positive_-alpha-beta-T-cell	ELF1_HS_SELEX_M5373_1	pwm	0.565346	0.662892	0.097546
ENCFF687FIQ	heart-right-ventricle	AR_MM_PBM_M1456_1	pwm	0.467212	0.564736	0.097524
ENCFF041CSB	NB4	EBF1_HS_SELEX_M5364_1	pwm	0.485664	0.583184	0.09752
ENCFF287SCA	GM04504	NEUROG2_HS_SELEX_M5653_1	pwm	0.499764	0.59727	0.097506
ENCFF215RET	kidney	EGR	kmer	0.511346	0.608792	0.097446
ENCFF862XVF	SK-MEL-5	SOX4_HS_PBM_M1578_1	pwm	0.555598	0.65303	0.097432
ENCFF880KWE	thymus	PLAGL1	kmer	0.479944	0.5773	0.097356
ENCFF764ODA	fibroblast-of-the-conjunctiva	NEUROG2_HS_SELEX_M5653_1	pwm	0.503066	0.600412	0.097346
ENCFF499HUD	KBM-7	ETSIII	kmer	0.629436	0.726778	0.097342
ENCFF768WKW	SK-N-DZ	PHOX2B_HS_SELEX_M5715_1	pwm	0.62464	0.721976	0.097336
ENCFF414BFO	muscle-of-back	NFATC2_HS_PBM_M1518_1	pwm	0.581724	0.679052	0.097328
ENCFF917YWY	small-intestine	THRA_HS_HOKOMOKO_M6521_1	pwm	0.465888	0.563174	0.097286
ENCFF972QQK	brain-pericyte	FOX	kmer	0.528746	0.625976	0.09723
ENCFF133ILP	T-cell	FLI1_HS_SELEX_M5431_1	pwm	0.61443	0.711652	0.097222
ENCFF904WZA	fibroblast-of-the-aortic-adventitia	TEAD1_HS_SELEX_M5904_1	pwm	0.511556	0.608776	0.09722
ENCFF365IGK	common-myeloid-progenitor_-CD34-positive	ETS	kmer	0.684758	0.781868	0.09711
ENCFF959FMP	thymus	MYBL1_HS_SELEX_M5645_1	pwm	0.516224	0.613284	0.09706
ENCFF058ACJ	large-intestine	RXRG_MM_PBM_M1440_1	pwm	0.473656	0.570694	0.097038
ENCFF842ESG	HFF-Myc	MYF6_MM_PBM_M0210_1	pwm	0.543508	0.640458	0.09695
ENCFF562ESR	transverse-colon	SNAI	kmer	0.460066	0.556982	0.096916
ENCFF925ZDU	NB4	EGR	kmer	0.448594	0.545456	0.096862
ENCFF104PLB	stomach	zfCXXC_SAND	kmer	0.435368	0.532184	0.096816
ENCFF484TLE	transverse-colon	ZFP959	kmer	0.470708	0.56748	0.096772
ENCFF964MRO	AG10803	RUNX3_HS_SELEX_M5792_1	pwm	0.5243	0.621052	0.096752
ENCFF701IYS	stomach	NFIA_HS_SELEX_M5661_1	pwm	0.504002	0.600748	0.096746
ENCFF954RNY	BE2C	AP2	kmer	0.515816	0.612502	0.096686
ENCFF541GPX	Caco-2	TFAP2A_HS_SELEX_M5912_1	pwm	0.515532	0.612152	0.09662
ENCFF168YQF	T-cell	ELF1_HS_SELEX_M5373_1	pwm	0.579456	0.676006	0.09655
ENCFF168YQF	T-cell	ZNF354C_HS_SELEX_M1950_1	pwm	0.474526	0.57107	0.096544
ENCFF222SCR	endodermal-cell	GLI	kmer	0.475398	0.571932	0.096534
ENCFF336OGZ	breast-epithelium	HIC1	kmer	0.48891	0.585382	0.096472
ENCFF484TLE	transverse-colon	TBX5_MM_PBM_M1627_1	pwm	0.496334	0.592778	0.096444
ENCFF559HGO	small-intestine	RXRG_MM_PBM_M1440_1	pwm	0.45829	0.554662	0.096372
ENCFF090WJW	cardiovascular-progenitor-cell	TEAD1_HS_SELEX_M5904_1	pwm	0.511244	0.607498	0.096254
ENCFF663DTX	large-intestine	GATA	kmer	0.49568	0.591892	0.096212
ENCFF696LIK	OCI-LY7	NEUROG2_HS_SELEX_M5653_1	pwm	0.50542	0.601622	0.096202
ENCFF533MFM	trophoblast-cell	TEA	kmer	0.51573	0.611926	0.096196
ENCFF331SYD	fibroblast-of-lung	RUNX3_HS_SELEX_M5792_1	pwm	0.617948	0.714054	0.096106
ENCFF701IYS	stomach	HIC1	kmer	0.464372	0.560458	0.096086
ENCFF954RNY	BE2C	NEUROG2_HS_SELEX_M5653_1	pwm	0.527208	0.623278	0.09607
ENCFF287SCA	GM04504	TEA	kmer	0.492946	0.58899	0.096044
ENCFF679HWR	large-intestine	RXRG_MM_PBM_M1440_1	pwm	0.46884	0.56483	0.09599
ENCFF711IJR	thymus	ZNF354C_HS_SELEX_M1950_1	pwm	0.455108	0.551092	0.095984
ENCFF523TKA	muscle-of-arm	NFATC2_HS_PBM_M1518_1	pwm	0.571034	0.66701	0.095976
ENCFF715BDS	muscle-of-arm	NFATC2_HS_PBM_M1518_1	pwm	0.550808	0.646774	0.095966
ENCFF810YLL	H1	ZIC	kmer	0.457404	0.553368	0.095964
ENCFF450BGX	common-myeloid-progenitor_-CD34-positive	ELF1_HS_SELEX_M5373_1	pwm	0.61473	0.71068	0.09595
ENCFF599BMR	small-intestine	HNF4	kmer	0.52603	0.621978	0.095948
ENCFF964MRO	AG10803	TEAD1_HS_SELEX_M5904_1	pwm	0.57308	0.669008	0.095928
ENCFF450BGX	common-myeloid-progenitor_-CD34-positive	NEUROG2_HS_SELEX_M5653_1	pwm	0.50736	0.603282	0.095922
ENCFF811USD	large-intestine	HNF4	kmer	0.498706	0.59462	0.095914
ENCFF947RDC	thymus	ELF1_HS_SELEX_M5373_1	pwm	0.563164	0.659036	0.095872
ENCFF165ZIA	lung-microvascular-endothelial-cell	NFAT	kmer	0.539386	0.63525	0.095864
ENCFF086KUU	heart	MEF2A_HS_SELEX_M5615_1	pwm	0.49079	0.58664	0.09585
ENCFF332PPZ	muscle-of-arm	NFATC2_HS_PBM_M1518_1	pwm	0.5905	0.68632	0.09582
ENCFF623AFX	K562	ZFX	kmer	0.520404	0.616202	0.095798
ENCFF764ODA	fibroblast-of-the-conjunctiva	AR_MM_PBM_M1456_1	pwm	0.467364	0.563122	0.095758
ENCFF171LSI	common-myeloid-progenitor_-CD34-positive	GATA	kmer	0.510112	0.605848	0.095736
ENCFF929VDK	common-myeloid-progenitor_-CD34-positive	NEUROG2_HS_SELEX_M5653_1	pwm	0.522696	0.61841	0.095714
ENCFF758SYE	gastrocnemius-medialis	HIC1	kmer	0.498754	0.594462	0.095708
ENCFF196VQQ	large-intestine	zfC4	kmer	0.486706	0.582376	0.09567
ENCFF218ZFS	brain	RFX4secondary_MM_PBM	pwm	0.508236	0.603902	0.095666
ENCFF338UFC	CD4-positive_-alpha-beta-T-cell	ZNF354C_HS_SELEX_M1950_1	pwm	0.45405	0.54971	0.09566
ENCFF856BCY	common-myeloid-progenitor_-CD34-positive	ZBTB18_HS_SELEX_M5968_1	pwm	0.503806	0.599382	0.095576
ENCFF541GPX	Caco-2	ZIC1_HS_SELEX_M5963_1	pwm	0.490966	0.58644	0.095474
ENCFF664QUB	right-lung	FOX	kmer	0.490708	0.586172	0.095464
ENCFF941ZRQ	trophoblast-cell	TFAP2A_HS_SELEX_M5912_1	pwm	0.503342	0.598766	0.095424
ENCFF566SXQ	CD8-positive_-alpha-beta-T-cell	FLI1_HS_SELEX_M5431_1	pwm	0.603052	0.698464	0.095412
ENCFF322ZNH	brain	HIC1	kmer	0.476274	0.571632	0.095358
ENCFF687FIQ	heart-right-ventricle	MEIS2_MM_PBM_M0965_1	pwm	0.530062	0.625356	0.095294
ENCFF142WAA	transverse-colon	ZFP959	kmer	0.486148	0.581394	0.095246
ENCFF230WVU	muscle-of-leg	OLIG1_HS_SELEX_M5690_1	pwm	0.474334	0.569572	0.095238
ENCFF393CAW	HFF-Myc	TEAD1_HS_SELEX_M5904_1	pwm	0.50135	0.596564	0.095214
ENCFF945DQY	left-lung	NFIX_HS_SELEX_M5665_1	pwm	0.554776	0.649976	0.0952
ENCFF718CUQ	renal-cortex-interstitium	zfCXXC_SAND	kmer	0.45754	0.55274	0.0952
ENCFF870MCD	H7	POU	kmer	0.511694	0.606882	0.095188
ENCFF267VKD	CD1c-positive-myeloid-dendritic-cell	PRDM1_HS_SELEX_M5749_1	pwm	0.530616	0.6258	0.095184
ENCFF181GIN	placenta	GCM	kmer	0.474884	0.57005	0.095166
ENCFF768WKW	SK-N-DZ	OTX1_HS_SELEX_M5699_1	pwm	0.520604	0.61574	0.095136
ENCFF805JKJ	large-intestine	TCF7_HS_SELEX_M6099_1	pwm	0.508524	0.60365	0.095126
ENCFF109RSW	CD4-positive_-alpha-beta-T-cell	FLI1_HS_SELEX_M5431_1	pwm	0.61399	0.709112	0.095122
ENCFF084LGH	dermis-blood-vessel-endothelial-cell	SOX4_HS_PBM_M1578_1	pwm	0.491884	0.587	0.095116
ENCFF984RKH	thymus	GLI	kmer	0.427282	0.522374	0.095092
ENCFF475BVB	A549	FOXB1_HS_SELEX_M5438_1	pwm	0.508574	0.60363	0.095056
ENCFF722OVO	brain	NFIA_HS_SELEX_M5661_1	pwm	0.507808	0.602864	0.095056
ENCFF474MZJ	muscle-of-back	NFATC2_HS_PBM_M1518_1	pwm	0.574792	0.669806	0.095014
ENCFF488SRU	fibroblast-of-skin-of-left-quadriceps	TEAD1_HS_SELEX_M5904_1	pwm	0.573546	0.66852	0.094974
ENCFF223UWR	skeletal-muscle-myoblast	RUNX3_HS_SELEX_M5792_1	pwm	0.583882	0.678844	0.094962
ENCFF564VUG	placenta	SNAI2_HS_SELEX_M5809_1	pwm	0.427778	0.522654	0.094876
ENCFF021ZDC	coronary-artery	EBF1_HS_SELEX_M5364_1	pwm	0.461712	0.556584	0.094872
ENCFF272AFT	fibroblast-of-the-conjunctiva	ZBTB18_HS_SELEX_M5968_1	pwm	0.472584	0.56741	0.094826
ENCFF764ODA	fibroblast-of-the-conjunctiva	CEBP	kmer	0.538764	0.63358	0.094816
ENCFF878LVP	dermis-microvascular-lymphatic-vessel-endothelial-cell	NFAT	kmer	0.553876	0.64866	0.094784
ENCFF221FND	Daoy	bZIP	kmer	0.588184	0.68296	0.094776
ENCFF541GPX	Caco-2	ZBTB1_MM_PBM_M0413_1	pwm	0.493072	0.587832	0.09476
ENCFF911OBG	AG04450	OLIG1_HS_SELEX_M5690_1	pwm	0.491516	0.586258	0.094742
ENCFF403PJS	B-cell	NFkBp50	kmer	0.466476	0.561156	0.09468
ENCFF109RSW	CD4-positive_-alpha-beta-T-cell	TALE_zfC2H2	kmer	0.488568	0.583244	0.094676
ENCFF640UDN	stomach	GRHL1_HS_SELEX_M5498_1	pwm	0.515476	0.610118	0.094642
ENCFF941FIK	small-intestine	GLI	kmer	0.433766	0.528406	0.09464
ENCFF303THQ	brain	RFX4secondary_MM_PBM	pwm	0.510544	0.605154	0.09461
ENCFF725QIG	common-myeloid-progenitor_-CD34-positive	GATA	kmer	0.52043	0.615032	0.094602
ENCFF243LFH	lung	OLIG1_HS_SELEX_M5690_1	pwm	0.487768	0.582352	0.094584
ENCFF528GDM	brain	TALE_zfC2H2	kmer	0.521022	0.615574	0.094552
ENCFF450BGX	common-myeloid-progenitor_-CD34-positive	ETS	kmer	0.669748	0.764292	0.094544
7	iPS-DF-4	SOX4_HS_PBM_M1578_1	pwm	0.49799	0.592534	0.094544
ENCFF810YLL	H1	GLI	kmer	0.445168	0.539688	0.09452
ENCFF732XMH	Peyers-patch	Tbox	kmer	0.48098	0.575438	0.094458
ENCFF474QAJ	fibroblast-of-skin-of-left-quadriceps	TEAD1_HS_SELEX_M5904_1	pwm	0.558812	0.65323	0.094418
ENCFF840ZTK	natural-killer-cell	FLI1_HS_SELEX_M5431_1	pwm	0.580496	0.674902	0.094406
ENCFF221FPW	fibroblast-of-villous-mesenchyme	CEBP	kmer	0.52671	0.62099	0.09428
ENCFF025CIA	H9	SOX4_HS_PBM_M1578_1	pwm	0.490778	0.585002	0.094224
ENCFF877XCF	stomach	zfCXXC_SAND	kmer	0.4595	0.553712	0.094212
ENCFF599BMR	small-intestine	FOXA2_MM_PBM_M0729_1	pwm	0.515904	0.610106	0.094202
ENCFF263YRO	B-cell	SFPI1_HS_SELEX_M5863_1	pwm	0.525684	0.619856	0.094172
ENCFF941FIK	small-intestine	ZFP959	kmer	0.44473	0.538902	0.094172
ENCFF336MQK	fibroblast-of-skin-of-left-biceps	TEAD1_HS_SELEX_M5904_1	pwm	0.562624	0.656778	0.094154
ENCFF196VQQ	large-intestine	TCF7_HS_SELEX_M6099_1	pwm	0.492602	0.586746	0.094144
ENCFF579QTP	muscle-of-leg	NEUROG2_HS_SELEX_M5653_1	pwm	0.493996	0.588134	0.094138
ENCFF452EGS	LNCaP-clone-FGC	HIC1	kmer	0.522908	0.616988	0.09408
ENCFF758SYE	gastrocnemius-medialis	NFIX_HS_SELEX_M5665_1	pwm	0.588462	0.682534	0.094072
ENCFF338NUC	muscle-of-arm	NFAT	kmer	0.491978	0.586036	0.094058
ENCFF185LPE	HL-60	RUNX3_HS_SELEX_M5792_1	pwm	0.554156	0.648208	0.094052
ENCFF061UBG	thymus	FLI1_HS_SELEX_M5431_1	pwm	0.594818	0.688848	0.09403
ENCFF917YWY	small-intestine	RXRG_MM_PBM_M1440_1	pwm	0.477604	0.571634	0.09403
ENCFF933ABR	stomach	zfCXXC_SAND	kmer	0.446408	0.540428	0.09402
ENCFF169QJZ	lung	ZBTB18_HS_SELEX_M5968_1	pwm	0.475036	0.569036	0.094
ENCFF512IPA	choroid-plexus-epithelial-cell	TEA	kmer	0.499304	0.5933	0.093996
ENCFF366XFZ	NT2_D1	SOXC	kmer	0.523556	0.61755	0.093994
ENCFF329APP	foreskin-fibroblast	NEUROG2_HS_SELEX_M5653_1	pwm	0.532444	0.626416	0.093972
ENCFF215RET	kidney	zfC2H2_RHD	kmer	0.605294	0.699264	0.09397
ENCFF230SPN	neural-progenitor-cell	SOXC	kmer	0.49327	0.587214	0.093944
ENCFF883WWT	ovary	NFIX_HS_SELEX_M5665_1	pwm	0.589254	0.68318	0.093926
ENCFF446FTN	lung-microvascular-endothelial-cell	FOX	kmer	0.500506	0.594416	0.09391
ENCFF941ZRQ	trophoblast-cell	MH1	kmer	0.542548	0.636432	0.093884
ENCFF862ZMZ	cardiac-muscle-cell	CEBP	kmer	0.541544	0.635408	0.093864
ENCFF196VQQ	large-intestine	ESRR-II	kmer	0.513652	0.607474	0.093822
ENCFF817OHQ	spinal-cord	HIC1	kmer	0.446904	0.540712	0.093808
ENCFF559HGO	small-intestine	ESRR-II	kmer	0.484768	0.578526	0.093758
ENCFF358VDV	heart	NFIX_HS_SELEX_M5665_1	pwm	0.589548	0.6833	0.093752
ENCFF081UUE	muscle-of-back	STAT1_HS_CHIPSEQ_M1955_1	pwm	0.509708	0.60346	0.093752
ENCFF741BMK	fibroblast-of-gingiva	CEBPB_HS_SELEX_M5314_1	pwm	0.58057	0.674314	0.093744
ENCFF751OEX	small-intestine	TBX5_MM_PBM_M1627_1	pwm	0.450876	0.544618	0.093742
ENCFF865LCY	SK-N-DZ	NEUROG2_HS_SELEX_M5653_1	pwm	0.517494	0.611228	0.093734
ENCFF223UWR	skeletal-muscle-myoblast	ID4_HS_SELEX_M5571_1	pwm	0.485344	0.579062	0.093718
ENCFF939RCS	heart-left-ventricle	GLI	kmer	0.453558	0.547258	0.0937
ENCFF105ETE	non-pigmented-ciliary-epithelial-cell	TEAD1_HS_SELEX_M5904_1	pwm	0.568514	0.662108	0.093594
ENCFF329APP	foreskin-fibroblast	ZBTB18_HS_SELEX_M5968_1	pwm	0.496282	0.589876	0.093594
ENCFF745COY	GM12865	FLI1_HS_SELEX_M5431_1	pwm	0.560996	0.65452	0.093524
ENCFF161NFM	transverse-colon	HIC2_HS_SELEX_M5512_1	pwm	0.455616	0.549064	0.093448
ENCFF097RTD	cardiac-muscle-cell	NKX-II	kmer	0.520486	0.613916	0.09343
[truncated: 5,020 more rows]
